# Supplementary material for: The close interaction between hypoxia-related proteins and metastasis in pancarcinomas
Source: Sci Rep. 2022 Jun 30;12:11100. doi: 10.1038/s41598-022-15246-y (PMC9246854; doi:10.1038/s41598-022-15246-y)
Supplement: Supplementary file 1 — Supplementary Information. [file 41598_2022_15246_MOESM1_ESM.xlsx]

## Sheet: ST_1
Supplementary Table 1. (UP) Frequency of genetic alterations in the hypoxia-related genes of 6343 individuals across 17 cancer types. (DOWN) Bonferroni correction per alteration type.
GENE	mRNA HIGH (1)	CNV: AMPLIFICATION (2)	MUTATION (3)	CNV: DEEP DELETION (4)	mRNA LOW (5)	FUSION GENE (6)	ALL
TP53	0.0362604	0.000472962	0.39114	0.0121394	0.0342109	0.00189185	0.476115
PIK3CA	0.135425	0.0641652	0.133848	0.00126123	0.00520259	0.000630616	0.340533
COPS5	0.203689	0.0316885	0	0.000157654	0.0104052	0.000472962	0.246413
ELOC	0.174523	0.0368911	0.000315308	0.000157654	0.000472962	0.000157654	0.212518
ARNT	0.137001	0.0488728	0	0.000157654	0.0115087	0.000630616	0.198171
TFRC	0.116822	0.0536024	0	0.00346839	0	0.000945925	0.174838
SMAD4	0.0365758	0.000788271	0.0288507	0.0211257	0.0813495	0.000315308	0.169005
ERBB2	0.091597	0.0457197	0.0162384	0.000788271	0.0058332	0.00646382	0.16664
NDRG1	0.100741	0.0586473	0	0.00126123	0.00126123	0.00126123	0.163172
USF1	0.104209	0.0461927	0	0.000472962	0.000945925	0.000157654	0.151979
EIF4EBP1	0.083399	0.0485575	0	0.0135583	0.000157654	0.00141889	0.147091
RPS6KB1	0.100583	0.0269589	0	0.000630616	0.0160807	0.000945925	0.145199
PSEN2	0.10957	0.0252247	0	0.00141889	0.00457197	0	0.140785
PRKAA1	0.091597	0.0313732	0	0.000472962	0.00804036	0.000315308	0.131799
EGFR	0.0851332	0.0307426	0.01277	0.00157654	0	0.00157654	0.131799
MAPK1	0.0692102	0.00977455	0.00346839	0.00141889	0.0441431	0.00157654	0.129592
EGLN1	0.0898628	0.0277471	0	0.00141889	0.00614851	0.000788271	0.125966
PLCG1	0.106732	0.0132429	0	0.000945925	0.00283777	0.000630616	0.124389
MDM4	0.0936465	0.0280624	0	0	0.000630616	0.000157654	0.122497
ATP1B1	0.0867098	0.0343686	0	0.000472962	0.000157654	0.000315308	0.122024
E2F1	0.101529	0.0189185	0	0.000788271	0.000157654	0	0.121394
AKT2	0.0835567	0.0148195	0.000788271	0.000472962	0.0182879	0.000472962	0.118398
SHC1	0.0733092	0.0420936	0	0.000472962	0.0017342	0.000630616	0.118241
AKT1	0.0638499	0.00725209	0.00835567	0.00441431	0.0305849	0	0.114457
PIK3CB	0.0829261	0.0182879	0.00252247	0.000945925	0.00472962	0.000788271	0.1102
ACTN4	0.0810342	0.0186032	0	0.000315308	0.00819801	0.0017342	0.109885
AKT3	0.0728362	0.0316885	0.000157654	0.0017342	0.00220716	0.00110358	0.109727
CREBBP	0.0594356	0.00851332	0.0187608	0.00551789	0.0141889	0.00189185	0.108308
MDM2	0.0769352	0.0268012	0	0.000157654	0.00157654	0.000630616	0.106101
RELA	0.0605392	0.0100899	0	0.00157654	0.0305849	0	0.10279
RPS6KB2	0.0737821	0.0253823	0	0.000315308	0.0017342	0.000788271	0.102002
VHL	0.0376793	0.00945925	0.0261706	0.00362604	0.0233328	0.000630616	0.100899
ANGPT1	0.0463503	0.0528141	0	0.00110358	0	0.000472962	0.100741
LMNA	0.0611698	0.0370487	0	0.00110358	0.00126123	0	0.100583
IL6R	0.0584897	0.0413054	0	0.000315308	0	0.000157654	0.100268
CUL2	0.0681066	0.00788271	0	0.00126123	0.0227022	0.000315308	0.100268
LTBR	0.0758316	0.0118241	0	0.0017342	0.00677913	0	0.096169
TSC2	0.062904	0.0096169	0.00662147	0.00252247	0.01277	0.000472962	0.0949078
EP300	0.0398865	0.00425666	0.0184455	0.0017342	0.0272742	0.00110358	0.0927006
NPEPPS	0.0717326	0.00804036	0	0.000945925	0.00977455	0.00141889	0.0919123
LDHB	0.0726785	0.0140312	0	0.00236481	0.0017342	0.000157654	0.0909664
CDH1	0.045562	0.00362604	0.0234905	0.00693678	0.00930159	0.00110358	0.0900205
PLOD2	0.0647958	0.0236481	0	0.000788271	0.000315308	0.000157654	0.0897052
SLC29A1	0.0681066	0.0189185	0	0.000630616	0.00157654	0.000315308	0.0895475
GAPDH	0.0736245	0.0115087	0	0.0017342	0.000157654	0.000945925	0.087971
PRKCA	0.0540754	0.0236481	0	0.00110358	0.000157654	0.00362604	0.0826108
OS9	0.0595933	0.0118241	0	0.000157654	0.00898628	0.00141889	0.0819801
SFRP1	0.0321614	0.0370487	0	0.0119817	0	0.000315308	0.0815072
HMOX2	0.0662147	0.00930159	0	0.00283777	0.00236481	0.000315308	0.0810342
PKLR	0.0403595	0.0394135	0	0.000315308	0	0.000315308	0.0804036
PFKP	0.0616428	0.0102475	0	0.00472962	0.00315308	0.000315308	0.0800883
ALDOA	0.0657418	0.0118241	0	0.000315308	0.000945925	0.000630616	0.0794577
CIAO3	0.0602239	0.00930159	0	0.00488728	0.00425666	0.000157654	0.0788271
VEGFA	0.0550213	0.0220716	0	0.000788271	0	0.000472962	0.0783541
MTOR	0.0422513	0.00331074	0.00599086	0.00394135	0.0206527	0.000788271	0.0769352
MAPK3	0.0589626	0.0118241	0	0.000315308	0.00409901	0.000157654	0.0753587
ITPR2	0.0474539	0.0230175	0	0.00220716	0.000157654	0.00157654	0.0744127
NOTCH1	0.0461927	0.00693678	0.0157654	0.00457197	0.000157654	0.000788271	0.0744127
ANGPT2	0.0353145	0.00504493	0	0.033738	0	0.000157654	0.0742551
ADORA1	0.0479268	0.02554	0	0.000315308	0	0	0.0737821
PFKL	0.0526565	0.00362604	0	0.0037837	0.01277	0.000472962	0.0733092
ATP1A2	0.0299543	0.0420936	0	0.000472962	0	0.000157654	0.0726785
IGF1R	0.0528141	0.0156078	0	0.00236481	0.000315308	0.000945925	0.0720479
CDKN1B	0.0427243	0.00630616	0.00520259	0.00804036	0.00930159	0.000157654	0.0717326
CHRNB2	0.0307426	0.0403595	0	0.000472962	0	0	0.071575
STAT5B	0.0433549	0.00677913	0	0.00220716	0.016869	0.00110358	0.0703137
RYR1	0.0512376	0.0186032	0	0.000157654	0	0.000315308	0.0703137
TGFB2	0.0450891	0.0228598	0	0.0017342	0	0.000157654	0.0698408
ELF2	0.033265	0.00268012	0	0.00189185	0.0310579	0.000630616	0.0695255
ALDOC	0.0551789	0.0137159	0	0.000157654	0	0	0.0690525
UCP2	0.0482422	0.0190761	0	0.00157654	0	0	0.0688948
UBE2B	0.0461927	0.00441431	0	0.0037837	0.0138736	0.000157654	0.0684219
PDHA1	0.0558096	0.00567555	0	0.00599086	0.000472962	0.000315308	0.0682642
STC1	0.0323191	0.000630616	0	0.0348416	0	0	0.0677913
PSMC3	0.0594356	0.0037837	0	0.00110358	0.00283777	0.000157654	0.0673183
VLDLR	0.046035	0.00930159	0	0.0115087	0	0.000315308	0.0671606
EGLN2	0.0531294	0.00914394	0	0.000630616	0.00346839	0.000472962	0.0668453
EIF4E2	0.0436702	0.00220716	0	0.00693678	0.0134006	0.000630616	0.0668453
STAT3	0.041936	0.00693678	0.0020495	0.00220716	0.0113511	0.0017342	0.0662147
MAP2K1	0.0430396	0.00268012	0.00599086	0.000315308	0.0134006	0.000472962	0.0658994
ENO1	0.050607	0.00520259	0	0.00536024	0.00457197	0	0.0657418
GATA6	0.0443008	0.0190761	0	0.000945925	0.000788271	0.000472962	0.0655841
ADA	0.0466656	0.017342	0	0.000472962	0	0.000157654	0.0646382
HK1	0.0413054	0.00488728	0	0.00252247	0.0145042	0.00110358	0.0643229
ENO2	0.0499764	0.0116664	0	0.00189185	0	0.000315308	0.0638499
CAV1	0.050607	0.00993221	0	0.00189185	0	0.000157654	0.0625887
PDHB	0.0365758	0.00236481	0	0.00520259	0.0181302	0.000157654	0.062431
EGLN3	0.0480845	0.0118241	0	0.000945925	0.000630616	0.000630616	0.0621157
CAMK2G	0.0428819	0.00835567	0	0.00268012	0.00725209	0.000788271	0.0619581
IFNG	0.0409901	0.0201797	0	0.000157654	0	0	0.0613274
HSP90B1	0.0558096	0.00220716	0	0.000945925	0.00157654	0.000157654	0.0606968
HYOU1	0.0510799	0.00268012	0	0.00567555	0.000945925	0	0.0603815
PPARA	0.0476115	0.00236481	0	0.00536024	0.00425666	0.000315308	0.0599086
MKNK1	0.0403595	0.00441431	0	0.000472962	0.0135583	0	0.058805
PIK3R2	0.0466656	0.0058332	0.00157654	0.00126123	0.00346839	0	0.058805
PDK1	0.0499764	0.00614851	0	0.00157654	0.000630616	0.000157654	0.0584897
SERPINE1	0.0406748	0.016396	0	0.00126123	0	0.000157654	0.0584897
IFNGR2	0.0466656	0.0037837	0	0.000157654	0.00693678	0.000472962	0.0580167
PFKFB3	0.0413054	0.0130853	0	0.00346839	0	0	0.0578591
MAP2K2	0.0457197	0.00299543	0.000630616	0.00472962	0.00315308	0.000472962	0.0577014
TEK	0.0364181	0.00567555	0	0.0154501	0	0.000157654	0.0577014
ATP1A1	0.0413054	0.00472962	0	0.00740974	0.00252247	0.00110358	0.0570708
EDN1	0.0446161	0.0102475	0	0.00220716	0	0	0.0570708
CLDN3	0.0471386	0.00867098	0	0.000945925	0	0	0.0567555
HMBS	0.0469809	0.00268012	0	0.0058332	0.000630616	0.000315308	0.0564402
EPO	0.0367334	0.0186032	0	0.000630616	0	0	0.0559672
SMAD3	0.0422513	0.00268012	0.00394135	0.00299543	0.00315308	0.000945925	0.0559672
RBX1	0.0487151	0.0037837	0	0.000945925	0.00141889	0.000945925	0.0558096
TGFA	0.0499764	0.00472962	0	0.000630616	0	0.000315308	0.0556519
PFKM	0.0479268	0.00362604	0	0.000945925	0.00315308	0	0.0556519
LDHA	0.0488728	0.0037837	0	0.000315308	0.00236481	0.000157654	0.0554942
PMAIP1	0.0402018	0.00157654	0.000157654	0.0135583	0	0	0.0554942
PIK3R1	0.0321614	0.000472962	0.01277	0.00914394	0.000472962	0.000472962	0.0554942
PGK1	0.0480845	0.00315308	0	0.00189185	0.0020495	0.000157654	0.0553366
ELOB	0.0444585	0.00835567	0	0.0020495	0.000157654	0.000157654	0.0551789
NRP2	0.0447738	0.00457197	0	0.00441431	0	0.00110358	0.0548636
SPRY2	0.042409	0.00409901	0	0.00725209	0.00110358	0	0.0548636
PML	0.0457197	0.0037837	0	0.000630616	0.00472962	0	0.0548636
ADAM8	0.0435125	0.00283777	0	0.00835567	0	0	0.054706
VEGFC	0.0368911	0.0017342	0	0.0149771	0.000945925	0	0.0545483
DDIT4	0.0447738	0.00740974	0	0.00220716	0	0	0.0543907
LDHC	0.050134	0.0037837	0	0.000315308	0	0.000157654	0.0543907
BBC3	0.0498187	0.0020495	0.000472962	0.00141889	0	0	0.0537601
KCNMA1	0.0398865	0.00851332	0	0.00362604	0	0.00157654	0.0536024
BCL2	0.0364181	0.00346839	0	0.0124547	0.000788271	0.000157654	0.0532871
STC2	0.0409901	0.00930159	0	0.00283777	0	0	0.0531294
MMP14	0.0427243	0.00772505	0	0.00189185	0	0.000472962	0.0528141
PRKAA2	0.045562	0.00551789	0	0.000945925	0.000157654	0.000315308	0.0524988
RPS6	0.0444585	0.00409901	0	0.00362604	0.000315308	0	0.0524988
PDGFB	0.0471386	0.00346839	0	0.00157654	0	0.000157654	0.0523412
SLC2A1	0.0431972	0.00772505	0	0.000157654	0.000630616	0.000472962	0.0521835
CDKN1A	0.0375217	0.00709443	0.00646382	0.00110358	0	0	0.0521835
HK3	0.0381523	0.0105628	0	0.00346839	0	0	0.0521835
PIK3R3	0.0436702	0.00488728	0.00126123	0.000472962	0.000472962	0.00110358	0.0518682
ITPR1	0.0351569	0.00662147	0	0.0096169	0	0.000472962	0.0518682
FLT1	0.0403595	0.00835567	0.000472962	0.00268012	0	0	0.0518682
BACH1	0.0428819	0.0017342	0	0.00299543	0.00346839	0.000630616	0.0517105
BAD	0.0446161	0.00299543	0	0.00126123	0.00126123	0.000945925	0.0510799
EIF4E	0.0384676	0.00126123	0	0.00110358	0.0100899	0.000157654	0.0510799
IFNGR1	0.0400441	0.00551789	0	0.00283777	0.00236481	0.000157654	0.0509223
EDNRB	0.0390982	0.00504493	0	0.00646382	0	0.000157654	0.0507646
NOS3	0.0403595	0.00646382	0	0.00362604	0	0.000157654	0.050607
AQP1	0.041463	0.00819801	0	0.000945925	0	0	0.050607
NFKB1	0.0301119	0.00110358	0	0.00126123	0.0176573	0.000157654	0.0502917
INSR	0.0406748	0.00346839	0	0.00394135	0.00126123	0.000788271	0.050134
HIF3A	0.0446161	0.00441431	0	0.000788271	0	0.000157654	0.0499764
BNIP3	0.0400441	0.00236481	0	0.00567555	0.00189185	0	0.0499764
NRP1	0.0402018	0.0058332	0	0.000945925	0.00236481	0.000472962	0.0498187
ANGPTL4	0.0431972	0.00394135	0	0.00252247	0	0.000157654	0.0498187
HK2	0.0458773	0.00283777	0	0.000630616	0	0.000315308	0.049661
PLOD1	0.0431972	0.00315308	0	0.00268012	0.000315308	0.000157654	0.0495034
DPP4	0.0427243	0.00299543	0	0.00299543	0	0.000157654	0.0488728
TGFBR1	0.0384676	0.00189185	0.00331074	0.00394135	0.000945925	0.000157654	0.0487151
PAM	0.0365758	0.00157654	0	0.0096169	0.000945925	0	0.0487151
PGK2	0.0359451	0.0113511	0	0.00126123	0	0	0.0485575
HIF1A	0.0422513	0.00394135	0	0.000945925	0.000945925	0.000157654	0.0482422
CYBB	0.0368911	0.0037837	0	0.00740974	0	0	0.0480845
EDNRA	0.0409901	0.00441431	0	0.00220716	0	0	0.0476115
SLC8A1	0.0409901	0.00409901	0	0.00189185	0	0.000472962	0.0474539
HKDC1	0.0402018	0.00472962	0	0.0020495	0	0.000315308	0.0472962
TGFB1	0.0398865	0.00520259	0	0.000788271	0.000788271	0.000472962	0.0471386
NR4A2	0.0406748	0.00252247	0	0.00346839	0	0.000315308	0.0469809
ANG	0.037837	0.00725209	0	0.00189185	0	0	0.0469809
TNC	0.0408324	0.00362604	0	0.00141889	0	0.000788271	0.0466656
PIK3CG	0.0334227	0.0119817	0	0.00110358	0	0.000157654	0.0466656
SOD2	0.0390982	0.0020495	0	0.00520259	0	0	0.0463503
CCL2	0.033738	0.00993221	0	0.00252247	0	0.000157654	0.0463503
TIMP1	0.0335803	0.00614851	0	0.00630616	0	0	0.046035
IL6	0.0320038	0.0126123	0	0.00126123	0	0	0.0458773
POLR2A	0.0228598	0.000630616	0	0.0104052	0.0115087	0.000472962	0.0458773
CHRNA7	0.0345262	0.00236481	0	0.00867098	0	0.000157654	0.0457197
ARNT2	0.0381523	0.00646382	0	0.000630616	0	0.000472962	0.0457197
ETS1	0.0329497	0.00346839	0	0.00930159	0	0	0.0457197
ENG	0.0381523	0.00520259	0	0.00141889	0	0.000630616	0.0454044
MMP3	0.0271165	0.0130853	0	0.00520259	0	0	0.0454044
TGFB3	0.0397288	0.00315308	0	0.00236481	0	0	0.0452467
TNF	0.0329497	0.0105628	0	0.0017342	0	0	0.0452467
LDHAL6B	0.0402018	0.00141889	0	0.00346839	0	0	0.0450891
THBS1	0.0365758	0.00110358	0	0.00725209	0	0.000157654	0.0450891
MKNK2	0.0334227	0.0017342	0	0.00662147	0.00268012	0.000315308	0.0447738
TF	0.0294813	0.0138736	0	0.000472962	0	0.000788271	0.0446161
IGFBP2	0.037837	0.00236481	0	0.00409901	0	0.000315308	0.0446161
CITED2	0.0362604	0.00551789	0	0.00268012	0	0.000157654	0.0446161
SCNN1B	0.0348416	0.00835567	0	0.000472962	0	0.000315308	0.0439855
ARG2	0.0390982	0.00220716	0	0.0017342	0	0.000472962	0.0435125
EPAS1	0.0364181	0.00536024	0	0.000945925	0.000315308	0.000472962	0.0435125
MMP2	0.0353145	0.00299543	0	0.00457197	0	0.000315308	0.0431972
CAMK2D	0.0354722	0.0017342	0	0.00189185	0.0037837	0.000315308	0.0431972
TLR4	0.0376793	0.0037837	0	0.00157654	0	0	0.0430396
SNAI3	0.0266435	0.00331074	0	0.012297	0	0	0.0422513
IL1B	0.0372064	0.0037837	0	0.000945925	0	0.000315308	0.0422513
ASCL2	0.0376793	0.00141889	0	0.00315308	0	0	0.0422513
PIK3CD	0.0327921	0.00362604	0.000472962	0.00488728	0	0.000157654	0.041936
CAMK2B	0.0323191	0.00835567	0	0.000630616	0	0.000472962	0.0417783
PGF	0.0364181	0.00331074	0	0.0020495	0	0	0.0417783
PRKCB	0.0307426	0.00977455	0	0.000788271	0	0.000315308	0.0416207
CXCR4	0.0346839	0.0017342	0.000157654	0.00394135	0	0.000157654	0.0406748
ADM	0.0357875	0.00189185	0	0.00236481	0	0	0.0400441
KCNK3	0.0348416	0.00457197	0	0.000630616	0	0	0.0400441
PRKCG	0.0313732	0.0075674	0	0.000630616	0	0.000157654	0.0397288
ADRA1B	0.0297966	0.00693678	0	0.00220716	0	0	0.0389406
SATB1	0.0299543	0.00362604	0	0.00362604	0.000788271	0.000157654	0.0381523
EIF4E1B	0.024594	0.0100899	0	0.00346839	0	0	0.0381523
TH	0.0316885	0.00315308	0	0.00315308	0	0	0.0379946
IGFBP1	0.029639	0.00740974	0	0.000788271	0	0	0.037837
NOS2	0.0225445	0.0138736	0	0.000315308	0	0.000472962	0.0372064
EGF	0.0338956	0.00220716	0	0.000157654	0	0.000315308	0.0365758
MT3	0.0297966	0.0020495	0	0.00441431	0	0	0.0362604
NPPA	0.0299543	0.00299543	0	0.00283777	0	0	0.0357875
VCAM1	0.0302696	0.00283777	0	0.00268012	0	0	0.0357875
IGF1	0.0316885	0.00268012	0	0.00110358	0	0.000157654	0.0356298
PDIA2	0.020968	0.00898628	0	0.00551789	0	0	0.0354722
CASR	0.020968	0.0118241	0	0.000945925	0	0.000788271	0.0345262
PDHA2	0.0312155	0.00126123	0	0.00189185	0	0	0.0343686
PLCG2	0.0227022	0.0017342	0	0.00930159	0	0.000472962	0.0342109
PDE5A	0.0294813	0.00141889	0	0.00315308	0	0.000157654	0.0342109
HMOX1	0.0285354	0.00409901	0	0.00110358	0	0.000157654	0.0338956
SOD3	0.0280624	0.00189185	0	0.00283777	0	0	0.0327921
ANGPT4	0.0266435	0.0037837	0	0.0017342	0	0	0.0321614
IL1A	0.0272742	0.0037837	0	0.000945925	0	0	0.0320038
CAMK2A	0.0220716	0.00709443	0	0.00157654	0	0.000315308	0.0310579
ENO3	0.0219139	0.00157654	0	0.00740974	0	0.000157654	0.0310579
NOS1	0.0249093	0.00472962	0	0.00110358	0	0	0.0307426
ALAS2	0.0200221	0.00520259	0	0.00472962	0	0.000157654	0.0301119
NPPB	0.0228598	0.00299543	0	0.00283777	0	0	0.028693
LDHAL6A	0.0234905	0.00331074	0	0.000157654	0	0	0.0269589
ALDOB	0.0184455	0.00236481	0	0.00268012	0	0.000315308	0.0238058
HBB	0.0206527	0.000472962	0	0.00236481	0	0	0.0234905
CYP1A1	0.0171843	0.00409901	0	0.000945925	0	0.000157654	0.0223869
HBG2	0.0186032	0.000472962	0	0.0017342	0	0.000157654	0.020968
INS	0.00867098	0.00315308	0	0.00315308	0	0	0.0149771
ENO4	0	0.00141889	0	0.00236481	0	0.000157654	0.00394135
CD24	0	0	0	0	0	0.000472962	0.000472962
Multiple Comparisons
Dependent Variable: FREQ
Bonferroni
(I) GROUP	(J) GROUP	Mean Difference (I-J)	Std. Error	Sig.	95% Confidence Interval
					Lower Bound	Upper Bound
1.00	2.00	.0369*	.00150	.000	.0325	.0413
	3.00	.0441*	.00150	.000	.0396	.0485
	4.00	.0441*	.00150	.000	.0397	.0485
	5.00	.0439*	.00150	.000	.0394	.0483
	6.00	.0469*	.00150	.000	.0425	.0514
2.00	1.00	-.0369*	.00150	.000	-.0413	-.0325
	3.00	.0072*	.00150	.000	.0028	.0116
	4.00	.0072*	.00150	.000	.0028	.0117
	5.00	.0070*	.00150	.000	.0026	.0114
	6.00	.0101*	.00150	.000	.0056	.0145
3.00	1.00	-.0441*	.00150	.000	-.0485	-.0396
	2.00	-.0072*	.00150	.000	-.0116	-.0028
	4.00	.0000	.00150	1000	-.0044	.0045
	5.00	-.0002	.00150	1000	-.0046	.0042
	6.00	.0029	.00150	.851	-.0016	.0073
4.00	1.00	-.0441*	.00150	.000	-.0485	-.0397
	2.00	-.0072*	.00150	.000	-.0117	-.0028
	3.00	.0000	.00150	1000	-.0045	.0044
	5.00	-.0002	.00150	1000	-.0047	.0042
	6.00	.0028	.00150	.901	-.0016	.0073
5.00	1.00	-.0439*	.00150	.000	-.0483	-.0394
	2.00	-.0070*	.00150	.000	-.0114	-.0026
	3.00	.0002	.00150	1000	-.0042	.0046
	4.00	.0002	.00150	1000	-.0042	.0047
	6.00	.0031	.00150	.612	-.0013	.0075
6.00	1.00	-.0469*	.00150	.000	-.0514	-.0425
	2.00	-.0101*	.00150	.000	-.0145	-.0056
	3.00	-.0029	.00150	.851	-.0073	.0016
	4.00	-.0028	.00150	.901	-.0073	.0016
	5.00	-.0031	.00150	.612	-.0075	.0013

## Sheet: ST_2
Supplementary Table 2. Frequency of genetic alterations in the hypoxia-related genes of 991 individuals with breast invasive carcinoma from the TCGA Pan-Cancer Atlas project (TCGA-BRCA-PanCancer).
GENE	TYPE	TOTAL	FREQUENCY	TYPE	TOTAL	FREQUENCY	TYPE	TOTAL	FREQUENCY	TYPE	TOTAL	FREQUENCY	TYPE	TOTAL	FREQUENCY	TYPE	TOTAL	FREQUENCY	TYPE	TOTAL	FREQUENCY
ACTN4	ALL	111	0.112008	AMPLIFICATION	18	0.0181635	DEEP DELETION	0	0	mRNA HIGH	86	0.086781	mRNA LOW	3	0.00302725	FUSION	4	0.00403633	MISSENSE, INFRAME, TRUNCATING MUTATIONS (PUTATIVE DRIVER)	0	0
ADA	ALL	68	0.0686176	AMPLIFICATION	15	0.0151362	DEEP DELETION	0	0	mRNA HIGH	52	0.0524723	mRNA LOW	0	0	FUSION	1	0.00100908	MISSENSE, INFRAME, TRUNCATING MUTATIONS (PUTATIVE DRIVER)	0	0
ADAM8	ALL	67	0.0676085	AMPLIFICATION	5	0.00504541	DEEP DELETION	9	0.00908174	mRNA HIGH	53	0.0534813	mRNA LOW	0	0	FUSION	0	0	MISSENSE, INFRAME, TRUNCATING MUTATIONS (PUTATIVE DRIVER)	0	0
ADM	ALL	31	0.0312815	AMPLIFICATION	3	0.00302725	DEEP DELETION	3	0.00302725	mRNA HIGH	25	0.025227	mRNA LOW	0	0	FUSION	0	0	MISSENSE, INFRAME, TRUNCATING MUTATIONS (PUTATIVE DRIVER)	0	0
ADORA1	ALL	131	0.13219	AMPLIFICATION	83	0.0837538	DEEP DELETION	0	0	mRNA HIGH	48	0.0484359	mRNA LOW	0	0	FUSION	0	0	MISSENSE, INFRAME, TRUNCATING MUTATIONS (PUTATIVE DRIVER)	0	0
ADRA1B	ALL	28	0.0282543	AMPLIFICATION	4	0.00403633	DEEP DELETION	3	0.00302725	mRNA HIGH	21	0.0211907	mRNA LOW	0	0	FUSION	0	0	MISSENSE, INFRAME, TRUNCATING MUTATIONS (PUTATIVE DRIVER)	0	0
AKT1	ALL	120	0.12109	AMPLIFICATION	12	0.012109	DEEP DELETION	2	0.00201816	mRNA HIGH	72	0.0726539	mRNA LOW	8	0.00807265	FUSION	0	0	MISSENSE, INFRAME, TRUNCATING MUTATIONS (PUTATIVE DRIVER)	26	0.0262361
AKT2	ALL	107	0.107972	AMPLIFICATION	15	0.0151362	DEEP DELETION	1	0.00100908	mRNA HIGH	73	0.073663	mRNA LOW	16	0.0161453	FUSION	1	0.00100908	MISSENSE, INFRAME, TRUNCATING MUTATIONS (PUTATIVE DRIVER)	1	0.00100908
AKT3	ALL	189	0.190716	AMPLIFICATION	99	0.0998991	DEEP DELETION	2	0.00201816	mRNA HIGH	88	0.0887992	mRNA LOW	0	0	FUSION	0	0	MISSENSE, INFRAME, TRUNCATING MUTATIONS (PUTATIVE DRIVER)	0	0
ALAS2	ALL	31	0.0312815	AMPLIFICATION	12	0.012109	DEEP DELETION	1	0.00100908	mRNA HIGH	18	0.0181635	mRNA LOW	0	0	FUSION	0	0	MISSENSE, INFRAME, TRUNCATING MUTATIONS (PUTATIVE DRIVER)	0	0
ALDOA	ALL	127	0.128153	AMPLIFICATION	42	0.0423814	DEEP DELETION	0	0	mRNA HIGH	83	0.0837538	mRNA LOW	0	0	FUSION	2	0.00201816	MISSENSE, INFRAME, TRUNCATING MUTATIONS (PUTATIVE DRIVER)	0	0
ALDOB	ALL	2	0.00201816	AMPLIFICATION	0	0	DEEP DELETION	1	0.00100908	mRNA HIGH	1	0.00100908	mRNA LOW	0	0	FUSION	0	0	MISSENSE, INFRAME, TRUNCATING MUTATIONS (PUTATIVE DRIVER)	0	0
ALDOC	ALL	97	0.0978809	AMPLIFICATION	37	0.037336	DEEP DELETION	1	0.00100908	mRNA HIGH	59	0.0595358	mRNA LOW	0	0	FUSION	0	0	MISSENSE, INFRAME, TRUNCATING MUTATIONS (PUTATIVE DRIVER)	0	0
ANG	ALL	46	0.0464178	AMPLIFICATION	5	0.00504541	DEEP DELETION	1	0.00100908	mRNA HIGH	40	0.0403633	mRNA LOW	0	0	FUSION	0	0	MISSENSE, INFRAME, TRUNCATING MUTATIONS (PUTATIVE DRIVER)	0	0
ANGPT1	ALL	182	0.183653	AMPLIFICATION	113	0.114026	DEEP DELETION	1	0.00100908	mRNA HIGH	66	0.0665994	mRNA LOW	0	0	FUSION	2	0.00201816	MISSENSE, INFRAME, TRUNCATING MUTATIONS (PUTATIVE DRIVER)	0	0
ANGPT2	ALL	99	0.0998991	AMPLIFICATION	6	0.00605449	DEEP DELETION	41	0.0413724	mRNA HIGH	51	0.0514632	mRNA LOW	0	0	FUSION	1	0.00100908	MISSENSE, INFRAME, TRUNCATING MUTATIONS (PUTATIVE DRIVER)	0	0
ANGPT4	ALL	18	0.0181635	AMPLIFICATION	2	0.00201816	DEEP DELETION	2	0.00201816	mRNA HIGH	14	0.0141271	mRNA LOW	0	0	FUSION	0	0	MISSENSE, INFRAME, TRUNCATING MUTATIONS (PUTATIVE DRIVER)	0	0
ANGPTL4	ALL	49	0.049445	AMPLIFICATION	9	0.00908174	DEEP DELETION	1	0.00100908	mRNA HIGH	39	0.0393542	mRNA LOW	0	0	FUSION	0	0	MISSENSE, INFRAME, TRUNCATING MUTATIONS (PUTATIVE DRIVER)	0	0
AQP1	ALL	42	0.0423814	AMPLIFICATION	8	0.00807265	DEEP DELETION	0	0	mRNA HIGH	34	0.0343088	mRNA LOW	0	0	FUSION	0	0	MISSENSE, INFRAME, TRUNCATING MUTATIONS (PUTATIVE DRIVER)	0	0
ARG2	ALL	41	0.0413724	AMPLIFICATION	3	0.00302725	DEEP DELETION	1	0.00100908	mRNA HIGH	37	0.037336	mRNA LOW	0	0	FUSION	0	0	MISSENSE, INFRAME, TRUNCATING MUTATIONS (PUTATIVE DRIVER)	0	0
ARNT	ALL	302	0.304743	AMPLIFICATION	99	0.0998991	DEEP DELETION	0	0	mRNA HIGH	190	0.191726	mRNA LOW	11	0.0110999	FUSION	2	0.00201816	MISSENSE, INFRAME, TRUNCATING MUTATIONS (PUTATIVE DRIVER)	0	0
ARNT2	ALL	36	0.0363269	AMPLIFICATION	12	0.012109	DEEP DELETION	1	0.00100908	mRNA HIGH	21	0.0211907	mRNA LOW	0	0	FUSION	2	0.00201816	MISSENSE, INFRAME, TRUNCATING MUTATIONS (PUTATIVE DRIVER)	0	0
ASCL2	ALL	50	0.0504541	AMPLIFICATION	2	0.00201816	DEEP DELETION	8	0.00807265	mRNA HIGH	40	0.0403633	mRNA LOW	0	0	FUSION	0	0	MISSENSE, INFRAME, TRUNCATING MUTATIONS (PUTATIVE DRIVER)	0	0
ATP1A1	ALL	69	0.0696266	AMPLIFICATION	7	0.00706357	DEEP DELETION	3	0.00302725	mRNA HIGH	55	0.0554995	mRNA LOW	0	0	FUSION	4	0.00403633	MISSENSE, INFRAME, TRUNCATING MUTATIONS (PUTATIVE DRIVER)	0	0
ATP1A2	ALL	113	0.114026	AMPLIFICATION	93	0.0938446	DEEP DELETION	0	0	mRNA HIGH	19	0.0191726	mRNA LOW	0	0	FUSION	1	0.00100908	MISSENSE, INFRAME, TRUNCATING MUTATIONS (PUTATIVE DRIVER)	0	0
ATP1B1	ALL	201	0.202825	AMPLIFICATION	73	0.073663	DEEP DELETION	0	0	mRNA HIGH	127	0.128153	mRNA LOW	0	0	FUSION	1	0.00100908	MISSENSE, INFRAME, TRUNCATING MUTATIONS (PUTATIVE DRIVER)	0	0
BACH1	ALL	63	0.0635721	AMPLIFICATION	4	0.00403633	DEEP DELETION	3	0.00302725	mRNA HIGH	54	0.0544904	mRNA LOW	0	0	FUSION	2	0.00201816	MISSENSE, INFRAME, TRUNCATING MUTATIONS (PUTATIVE DRIVER)	0	0
BAD	ALL	44	0.0443996	AMPLIFICATION	3	0.00302725	DEEP DELETION	2	0.00201816	mRNA HIGH	38	0.0383451	mRNA LOW	0	0	FUSION	1	0.00100908	MISSENSE, INFRAME, TRUNCATING MUTATIONS (PUTATIVE DRIVER)	0	0
BBC3	ALL	39	0.0393542	AMPLIFICATION	3	0.00302725	DEEP DELETION	2	0.00201816	mRNA HIGH	34	0.0343088	mRNA LOW	0	0	FUSION	0	0	MISSENSE, INFRAME, TRUNCATING MUTATIONS (PUTATIVE DRIVER)	0	0
BCL2	ALL	57	0.0575177	AMPLIFICATION	12	0.012109	DEEP DELETION	5	0.00504541	mRNA HIGH	40	0.0403633	mRNA LOW	0	0	FUSION	0	0	MISSENSE, INFRAME, TRUNCATING MUTATIONS (PUTATIVE DRIVER)	0	0
BNIP3	ALL	68	0.0686176	AMPLIFICATION	5	0.00504541	DEEP DELETION	9	0.00908174	mRNA HIGH	54	0.0544904	mRNA LOW	0	0	FUSION	0	0	MISSENSE, INFRAME, TRUNCATING MUTATIONS (PUTATIVE DRIVER)	0	0
CAMK2A	ALL	17	0.0171544	AMPLIFICATION	4	0.00403633	DEEP DELETION	2	0.00201816	mRNA HIGH	10	0.0100908	mRNA LOW	0	0	FUSION	1	0.00100908	MISSENSE, INFRAME, TRUNCATING MUTATIONS (PUTATIVE DRIVER)	0	0
CAMK2B	ALL	44	0.0443996	AMPLIFICATION	10	0.0100908	DEEP DELETION	0	0	mRNA HIGH	34	0.0343088	mRNA LOW	0	0	FUSION	0	0	MISSENSE, INFRAME, TRUNCATING MUTATIONS (PUTATIVE DRIVER)	0	0
CAMK2D	ALL	41	0.0413724	AMPLIFICATION	5	0.00504541	DEEP DELETION	1	0.00100908	mRNA HIGH	35	0.0353179	mRNA LOW	0	0	FUSION	0	0	MISSENSE, INFRAME, TRUNCATING MUTATIONS (PUTATIVE DRIVER)	0	0
CAMK2G	ALL	84	0.0847629	AMPLIFICATION	16	0.0161453	DEEP DELETION	0	0	mRNA HIGH	61	0.061554	mRNA LOW	4	0.00403633	FUSION	3	0.00302725	MISSENSE, INFRAME, TRUNCATING MUTATIONS (PUTATIVE DRIVER)	0	0
CASR	ALL	25	0.025227	AMPLIFICATION	4	0.00403633	DEEP DELETION	1	0.00100908	mRNA HIGH	20	0.0201816	mRNA LOW	0	0	FUSION	0	0	MISSENSE, INFRAME, TRUNCATING MUTATIONS (PUTATIVE DRIVER)	0	0
CAV1	ALL	51	0.0514632	AMPLIFICATION	4	0.00403633	DEEP DELETION	1	0.00100908	mRNA HIGH	46	0.0464178	mRNA LOW	0	0	FUSION	0	0	MISSENSE, INFRAME, TRUNCATING MUTATIONS (PUTATIVE DRIVER)	0	0
CCL2	ALL	46	0.0464178	AMPLIFICATION	17	0.0171544	DEEP DELETION	3	0.00302725	mRNA HIGH	25	0.025227	mRNA LOW	0	0	FUSION	1	0.00100908	MISSENSE, INFRAME, TRUNCATING MUTATIONS (PUTATIVE DRIVER)	0	0
CD24	ALL	1	0.00100908	AMPLIFICATION	0	0	DEEP DELETION	0	0	mRNA HIGH	0	0	mRNA LOW	0	0	FUSION	1	0.00100908	MISSENSE, INFRAME, TRUNCATING MUTATIONS (PUTATIVE DRIVER)	0	0
CDH1	ALL	160	0.161453	AMPLIFICATION	3	0.00302725	DEEP DELETION	15	0.0151362	mRNA HIGH	27	0.0272452	mRNA LOW	0	0	FUSION	2	0.00201816	MISSENSE, INFRAME, TRUNCATING MUTATIONS (PUTATIVE DRIVER)	113	0.114026
CDKN1A	ALL	46	0.0464178	AMPLIFICATION	11	0.0110999	DEEP DELETION	1	0.00100908	mRNA HIGH	32	0.0322906	mRNA LOW	0	0	FUSION	0	0	MISSENSE, INFRAME, TRUNCATING MUTATIONS (PUTATIVE DRIVER)	2	0.00201816
CDKN1B	ALL	61	0.061554	AMPLIFICATION	10	0.0100908	DEEP DELETION	6	0.00605449	mRNA HIGH	34	0.0343088	mRNA LOW	0	0	FUSION	1	0.00100908	MISSENSE, INFRAME, TRUNCATING MUTATIONS (PUTATIVE DRIVER)	10	0.0100908
CHRNA7	ALL	36	0.0363269	AMPLIFICATION	3	0.00302725	DEEP DELETION	13	0.0131181	mRNA HIGH	20	0.0201816	mRNA LOW	0	0	FUSION	0	0	MISSENSE, INFRAME, TRUNCATING MUTATIONS (PUTATIVE DRIVER)	0	0
CHRNB2	ALL	120	0.12109	AMPLIFICATION	87	0.0877901	DEEP DELETION	0	0	mRNA HIGH	33	0.0332997	mRNA LOW	0	0	FUSION	0	0	MISSENSE, INFRAME, TRUNCATING MUTATIONS (PUTATIVE DRIVER)	0	0
CIAO3	ALL	133	0.134208	AMPLIFICATION	40	0.0403633	DEEP DELETION	2	0.00201816	mRNA HIGH	90	0.0908174	mRNA LOW	0	0	FUSION	1	0.00100908	MISSENSE, INFRAME, TRUNCATING MUTATIONS (PUTATIVE DRIVER)	0	0
CITED2	ALL	46	0.0464178	AMPLIFICATION	14	0.0141271	DEEP DELETION	2	0.00201816	mRNA HIGH	30	0.0302725	mRNA LOW	0	0	FUSION	0	0	MISSENSE, INFRAME, TRUNCATING MUTATIONS (PUTATIVE DRIVER)	0	0
CLDN3	ALL	51	0.0514632	AMPLIFICATION	6	0.00605449	DEEP DELETION	0	0	mRNA HIGH	45	0.0454087	mRNA LOW	0	0	FUSION	0	0	MISSENSE, INFRAME, TRUNCATING MUTATIONS (PUTATIVE DRIVER)	0	0
COPS5	ALL	396	0.399596	AMPLIFICATION	62	0.0625631	DEEP DELETION	0	0	mRNA HIGH	324	0.326942	mRNA LOW	8	0.00807265	FUSION	2	0.00201816	MISSENSE, INFRAME, TRUNCATING MUTATIONS (PUTATIVE DRIVER)	0	0
CREBBP	ALL	209	0.210898	AMPLIFICATION	41	0.0413724	DEEP DELETION	6	0.00605449	mRNA HIGH	130	0.131181	mRNA LOW	23	0.0232089	FUSION	2	0.00201816	MISSENSE, INFRAME, TRUNCATING MUTATIONS (PUTATIVE DRIVER)	7	0.00706357
CUL2	ALL	110	0.110999	AMPLIFICATION	6	0.00605449	DEEP DELETION	1	0.00100908	mRNA HIGH	90	0.0908174	mRNA LOW	13	0.0131181	FUSION	0	0	MISSENSE, INFRAME, TRUNCATING MUTATIONS (PUTATIVE DRIVER)	0	0
CXCR4	ALL	38	0.0383451	AMPLIFICATION	2	0.00201816	DEEP DELETION	1	0.00100908	mRNA HIGH	35	0.0353179	mRNA LOW	0	0	FUSION	0	0	MISSENSE, INFRAME, TRUNCATING MUTATIONS (PUTATIVE DRIVER)	0	0
CYBB	ALL	49	0.049445	AMPLIFICATION	3	0.00302725	DEEP DELETION	2	0.00201816	mRNA HIGH	44	0.0443996	mRNA LOW	0	0	FUSION	0	0	MISSENSE, INFRAME, TRUNCATING MUTATIONS (PUTATIVE DRIVER)	0	0
CYP1A1	ALL	27	0.0272452	AMPLIFICATION	9	0.00908174	DEEP DELETION	3	0.00302725	mRNA HIGH	15	0.0151362	mRNA LOW	0	0	FUSION	0	0	MISSENSE, INFRAME, TRUNCATING MUTATIONS (PUTATIVE DRIVER)	0	0
DDIT4	ALL	68	0.0686176	AMPLIFICATION	14	0.0141271	DEEP DELETION	0	0	mRNA HIGH	54	0.0544904	mRNA LOW	0	0	FUSION	0	0	MISSENSE, INFRAME, TRUNCATING MUTATIONS (PUTATIVE DRIVER)	0	0
DPP4	ALL	25	0.025227	AMPLIFICATION	0	0	DEEP DELETION	0	0	mRNA HIGH	25	0.025227	mRNA LOW	0	0	FUSION	0	0	MISSENSE, INFRAME, TRUNCATING MUTATIONS (PUTATIVE DRIVER)	0	0
E2F1	ALL	115	0.116044	AMPLIFICATION	8	0.00807265	DEEP DELETION	1	0.00100908	mRNA HIGH	106	0.106963	mRNA LOW	0	0	FUSION	0	0	MISSENSE, INFRAME, TRUNCATING MUTATIONS (PUTATIVE DRIVER)	0	0
EDN1	ALL	67	0.0676085	AMPLIFICATION	14	0.0141271	DEEP DELETION	2	0.00201816	mRNA HIGH	51	0.0514632	mRNA LOW	0	0	FUSION	0	0	MISSENSE, INFRAME, TRUNCATING MUTATIONS (PUTATIVE DRIVER)	0	0
EDNRA	ALL	53	0.0534813	AMPLIFICATION	7	0.00706357	DEEP DELETION	0	0	mRNA HIGH	46	0.0464178	mRNA LOW	0	0	FUSION	0	0	MISSENSE, INFRAME, TRUNCATING MUTATIONS (PUTATIVE DRIVER)	0	0
EDNRB	ALL	43	0.0433905	AMPLIFICATION	3	0.00302725	DEEP DELETION	5	0.00504541	mRNA HIGH	35	0.0353179	mRNA LOW	0	0	FUSION	0	0	MISSENSE, INFRAME, TRUNCATING MUTATIONS (PUTATIVE DRIVER)	0	0
EGF	ALL	26	0.0262361	AMPLIFICATION	5	0.00504541	DEEP DELETION	0	0	mRNA HIGH	20	0.0201816	mRNA LOW	0	0	FUSION	1	0.00100908	MISSENSE, INFRAME, TRUNCATING MUTATIONS (PUTATIVE DRIVER)	0	0
EGFR	ALL	69	0.0696266	AMPLIFICATION	17	0.0171544	DEEP DELETION	1	0.00100908	mRNA HIGH	48	0.0484359	mRNA LOW	0	0	FUSION	0	0	MISSENSE, INFRAME, TRUNCATING MUTATIONS (PUTATIVE DRIVER)	3	0.00302725
EGLN1	ALL	263	0.265388	AMPLIFICATION	95	0.0958628	DEEP DELETION	0	0	mRNA HIGH	161	0.162462	mRNA LOW	6	0.00605449	FUSION	1	0.00100908	MISSENSE, INFRAME, TRUNCATING MUTATIONS (PUTATIVE DRIVER)	0	0
EGLN2	ALL	40	0.0403633	AMPLIFICATION	11	0.0110999	DEEP DELETION	1	0.00100908	mRNA HIGH	28	0.0282543	mRNA LOW	0	0	FUSION	0	0	MISSENSE, INFRAME, TRUNCATING MUTATIONS (PUTATIVE DRIVER)	0	0
EGLN3	ALL	68	0.0686176	AMPLIFICATION	14	0.0141271	DEEP DELETION	0	0	mRNA HIGH	54	0.0544904	mRNA LOW	0	0	FUSION	0	0	MISSENSE, INFRAME, TRUNCATING MUTATIONS (PUTATIVE DRIVER)	0	0
EIF4E	ALL	62	0.0625631	AMPLIFICATION	4	0.00403633	DEEP DELETION	1	0.00100908	mRNA HIGH	51	0.0514632	mRNA LOW	5	0.00504541	FUSION	1	0.00100908	MISSENSE, INFRAME, TRUNCATING MUTATIONS (PUTATIVE DRIVER)	0	0
EIF4E1B	ALL	32	0.0322906	AMPLIFICATION	11	0.0110999	DEEP DELETION	2	0.00201816	mRNA HIGH	19	0.0191726	mRNA LOW	0	0	FUSION	0	0	MISSENSE, INFRAME, TRUNCATING MUTATIONS (PUTATIVE DRIVER)	0	0
EIF4E2	ALL	83	0.0837538	AMPLIFICATION	1	0.00100908	DEEP DELETION	5	0.00504541	mRNA HIGH	52	0.0524723	mRNA LOW	21	0.0211907	FUSION	4	0.00403633	MISSENSE, INFRAME, TRUNCATING MUTATIONS (PUTATIVE DRIVER)	0	0
EIF4EBP1	ALL	252	0.254289	AMPLIFICATION	114	0.115035	DEEP DELETION	9	0.00908174	mRNA HIGH	125	0.126135	mRNA LOW	0	0	FUSION	4	0.00403633	MISSENSE, INFRAME, TRUNCATING MUTATIONS (PUTATIVE DRIVER)	0	0
ELF2	ALL	94	0.0948537	AMPLIFICATION	2	0.00201816	DEEP DELETION	0	0	mRNA HIGH	30	0.0302725	mRNA LOW	60	0.0605449	FUSION	2	0.00201816	MISSENSE, INFRAME, TRUNCATING MUTATIONS (PUTATIVE DRIVER)	0	0
ELOB	ALL	112	0.113017	AMPLIFICATION	40	0.0403633	DEEP DELETION	0	0	mRNA HIGH	72	0.0726539	mRNA LOW	0	0	FUSION	0	0	MISSENSE, INFRAME, TRUNCATING MUTATIONS (PUTATIVE DRIVER)	0	0
ELOC	ALL	376	0.379415	AMPLIFICATION	71	0.0716448	DEEP DELETION	0	0	mRNA HIGH	305	0.30777	mRNA LOW	0	0	FUSION	0	0	MISSENSE, INFRAME, TRUNCATING MUTATIONS (PUTATIVE DRIVER)	0	0
ENG	ALL	40	0.0403633	AMPLIFICATION	9	0.00908174	DEEP DELETION	2	0.00201816	mRNA HIGH	27	0.0272452	mRNA LOW	0	0	FUSION	2	0.00201816	MISSENSE, INFRAME, TRUNCATING MUTATIONS (PUTATIVE DRIVER)	0	0
ENO1	ALL	69	0.0696266	AMPLIFICATION	4	0.00403633	DEEP DELETION	5	0.00504541	mRNA HIGH	60	0.0605449	mRNA LOW	0	0	FUSION	0	0	MISSENSE, INFRAME, TRUNCATING MUTATIONS (PUTATIVE DRIVER)	0	0
ENO2	ALL	61	0.061554	AMPLIFICATION	18	0.0181635	DEEP DELETION	1	0.00100908	mRNA HIGH	42	0.0423814	mRNA LOW	0	0	FUSION	0	0	MISSENSE, INFRAME, TRUNCATING MUTATIONS (PUTATIVE DRIVER)	0	0
ENO3	ALL	14	0.0141271	AMPLIFICATION	3	0.00302725	DEEP DELETION	4	0.00403633	mRNA HIGH	7	0.00706357	mRNA LOW	0	0	FUSION	0	0	MISSENSE, INFRAME, TRUNCATING MUTATIONS (PUTATIVE DRIVER)	0	0
ENO4	ALL	2	0.00201816	AMPLIFICATION	1	0.00100908	DEEP DELETION	1	0.00100908	mRNA HIGH	0	0	mRNA LOW	0	0	FUSION	0	0	MISSENSE, INFRAME, TRUNCATING MUTATIONS (PUTATIVE DRIVER)	0	0
EP300	ALL	101	0.101917	AMPLIFICATION	1	0.00100908	DEEP DELETION	2	0.00201816	mRNA HIGH	26	0.0262361	mRNA LOW	62	0.0625631	FUSION	1	0.00100908	MISSENSE, INFRAME, TRUNCATING MUTATIONS (PUTATIVE DRIVER)	9	0.00908174
EPAS1	ALL	43	0.0433905	AMPLIFICATION	6	0.00605449	DEEP DELETION	1	0.00100908	mRNA HIGH	36	0.0363269	mRNA LOW	0	0	FUSION	0	0	MISSENSE, INFRAME, TRUNCATING MUTATIONS (PUTATIVE DRIVER)	0	0
EPO	ALL	37	0.037336	AMPLIFICATION	9	0.00908174	DEEP DELETION	1	0.00100908	mRNA HIGH	27	0.0272452	mRNA LOW	0	0	FUSION	0	0	MISSENSE, INFRAME, TRUNCATING MUTATIONS (PUTATIVE DRIVER)	0	0
ERBB2	ALL	308	0.310797	AMPLIFICATION	117	0.118063	DEEP DELETION	0	0	mRNA HIGH	150	0.151362	mRNA LOW	8	0.00807265	FUSION	15	0.0151362	MISSENSE, INFRAME, TRUNCATING MUTATIONS (PUTATIVE DRIVER)	18	0.0181635
ETS1	ALL	40	0.0403633	AMPLIFICATION	1	0.00100908	DEEP DELETION	10	0.0100908	mRNA HIGH	29	0.0292634	mRNA LOW	0	0	FUSION	0	0	MISSENSE, INFRAME, TRUNCATING MUTATIONS (PUTATIVE DRIVER)	0	0
FLT1	ALL	54	0.0544904	AMPLIFICATION	9	0.00908174	DEEP DELETION	4	0.00403633	mRNA HIGH	40	0.0403633	mRNA LOW	0	0	FUSION	0	0	MISSENSE, INFRAME, TRUNCATING MUTATIONS (PUTATIVE DRIVER)	1	0.00100908
GAPDH	ALL	110	0.110999	AMPLIFICATION	17	0.0171544	DEEP DELETION	1	0.00100908	mRNA HIGH	92	0.0928355	mRNA LOW	0	0	FUSION	0	0	MISSENSE, INFRAME, TRUNCATING MUTATIONS (PUTATIVE DRIVER)	0	0
GATA6	ALL	37	0.037336	AMPLIFICATION	1	0.00100908	DEEP DELETION	1	0.00100908	mRNA HIGH	35	0.0353179	mRNA LOW	0	0	FUSION	0	0	MISSENSE, INFRAME, TRUNCATING MUTATIONS (PUTATIVE DRIVER)	0	0
HBB	ALL	28	0.0282543	AMPLIFICATION	2	0.00201816	DEEP DELETION	6	0.00605449	mRNA HIGH	20	0.0201816	mRNA LOW	0	0	FUSION	0	0	MISSENSE, INFRAME, TRUNCATING MUTATIONS (PUTATIVE DRIVER)	0	0
HBG2	ALL	19	0.0191726	AMPLIFICATION	2	0.00201816	DEEP DELETION	5	0.00504541	mRNA HIGH	12	0.012109	mRNA LOW	0	0	FUSION	0	0	MISSENSE, INFRAME, TRUNCATING MUTATIONS (PUTATIVE DRIVER)	0	0
HIF1A	ALL	59	0.0595358	AMPLIFICATION	6	0.00605449	DEEP DELETION	1	0.00100908	mRNA HIGH	52	0.0524723	mRNA LOW	0	0	FUSION	0	0	MISSENSE, INFRAME, TRUNCATING MUTATIONS (PUTATIVE DRIVER)	0	0
HIF3A	ALL	39	0.0393542	AMPLIFICATION	5	0.00504541	DEEP DELETION	2	0.00201816	mRNA HIGH	32	0.0322906	mRNA LOW	0	0	FUSION	0	0	MISSENSE, INFRAME, TRUNCATING MUTATIONS (PUTATIVE DRIVER)	0	0
HK1	ALL	78	0.0787084	AMPLIFICATION	8	0.00807265	DEEP DELETION	0	0	mRNA HIGH	41	0.0413724	mRNA LOW	26	0.0262361	FUSION	3	0.00302725	MISSENSE, INFRAME, TRUNCATING MUTATIONS (PUTATIVE DRIVER)	0	0
HK2	ALL	46	0.0464178	AMPLIFICATION	1	0.00100908	DEEP DELETION	1	0.00100908	mRNA HIGH	43	0.0433905	mRNA LOW	0	0	FUSION	1	0.00100908	MISSENSE, INFRAME, TRUNCATING MUTATIONS (PUTATIVE DRIVER)	0	0
HK3	ALL	55	0.0554995	AMPLIFICATION	11	0.0110999	DEEP DELETION	2	0.00201816	mRNA HIGH	42	0.0423814	mRNA LOW	0	0	FUSION	0	0	MISSENSE, INFRAME, TRUNCATING MUTATIONS (PUTATIVE DRIVER)	0	0
HKDC1	ALL	32	0.0322906	AMPLIFICATION	8	0.00807265	DEEP DELETION	0	0	mRNA HIGH	24	0.024218	mRNA LOW	0	0	FUSION	0	0	MISSENSE, INFRAME, TRUNCATING MUTATIONS (PUTATIVE DRIVER)	0	0
HMBS	ALL	46	0.0464178	AMPLIFICATION	1	0.00100908	DEEP DELETION	7	0.00706357	mRNA HIGH	37	0.037336	mRNA LOW	0	0	FUSION	1	0.00100908	MISSENSE, INFRAME, TRUNCATING MUTATIONS (PUTATIVE DRIVER)	0	0
HMOX1	ALL	17	0.0171544	AMPLIFICATION	4	0.00403633	DEEP DELETION	0	0	mRNA HIGH	12	0.012109	mRNA LOW	0	0	FUSION	1	0.00100908	MISSENSE, INFRAME, TRUNCATING MUTATIONS (PUTATIVE DRIVER)	0	0
HMOX2	ALL	148	0.149344	AMPLIFICATION	43	0.0433905	DEEP DELETION	0	0	mRNA HIGH	105	0.105954	mRNA LOW	0	0	FUSION	0	0	MISSENSE, INFRAME, TRUNCATING MUTATIONS (PUTATIVE DRIVER)	0	0
HSP90B1	ALL	59	0.0595358	AMPLIFICATION	1	0.00100908	DEEP DELETION	3	0.00302725	mRNA HIGH	55	0.0554995	mRNA LOW	0	0	FUSION	0	0	MISSENSE, INFRAME, TRUNCATING MUTATIONS (PUTATIVE DRIVER)	0	0
HYOU1	ALL	43	0.0433905	AMPLIFICATION	1	0.00100908	DEEP DELETION	6	0.00605449	mRNA HIGH	36	0.0363269	mRNA LOW	0	0	FUSION	0	0	MISSENSE, INFRAME, TRUNCATING MUTATIONS (PUTATIVE DRIVER)	0	0
IFNG	ALL	54	0.0544904	AMPLIFICATION	22	0.0221998	DEEP DELETION	0	0	mRNA HIGH	32	0.0322906	mRNA LOW	0	0	FUSION	0	0	MISSENSE, INFRAME, TRUNCATING MUTATIONS (PUTATIVE DRIVER)	0	0
IFNGR1	ALL	60	0.0605449	AMPLIFICATION	13	0.0131181	DEEP DELETION	2	0.00201816	mRNA HIGH	45	0.0454087	mRNA LOW	0	0	FUSION	0	0	MISSENSE, INFRAME, TRUNCATING MUTATIONS (PUTATIVE DRIVER)	0	0
IFNGR2	ALL	69	0.0696266	AMPLIFICATION	9	0.00908174	DEEP DELETION	0	0	mRNA HIGH	51	0.0514632	mRNA LOW	9	0.00908174	FUSION	0	0	MISSENSE, INFRAME, TRUNCATING MUTATIONS (PUTATIVE DRIVER)	0	0
IGF1	ALL	35	0.0353179	AMPLIFICATION	1	0.00100908	DEEP DELETION	2	0.00201816	mRNA HIGH	32	0.0322906	mRNA LOW	0	0	FUSION	0	0	MISSENSE, INFRAME, TRUNCATING MUTATIONS (PUTATIVE DRIVER)	0	0
IGF1R	ALL	98	0.09889	AMPLIFICATION	37	0.037336	DEEP DELETION	3	0.00302725	mRNA HIGH	55	0.0554995	mRNA LOW	0	0	FUSION	3	0.00302725	MISSENSE, INFRAME, TRUNCATING MUTATIONS (PUTATIVE DRIVER)	0	0
IGFBP1	ALL	9	0.00908174	AMPLIFICATION	4	0.00403633	DEEP DELETION	1	0.00100908	mRNA HIGH	4	0.00403633	mRNA LOW	0	0	FUSION	0	0	MISSENSE, INFRAME, TRUNCATING MUTATIONS (PUTATIVE DRIVER)	0	0
IGFBP2	ALL	27	0.0272452	AMPLIFICATION	5	0.00504541	DEEP DELETION	5	0.00504541	mRNA HIGH	17	0.0171544	mRNA LOW	0	0	FUSION	0	0	MISSENSE, INFRAME, TRUNCATING MUTATIONS (PUTATIVE DRIVER)	0	0
IL1A	ALL	7	0.00706357	AMPLIFICATION	1	0.00100908	DEEP DELETION	0	0	mRNA HIGH	6	0.00605449	mRNA LOW	0	0	FUSION	0	0	MISSENSE, INFRAME, TRUNCATING MUTATIONS (PUTATIVE DRIVER)	0	0
IL1B	ALL	41	0.0413724	AMPLIFICATION	2	0.00201816	DEEP DELETION	0	0	mRNA HIGH	39	0.0393542	mRNA LOW	0	0	FUSION	0	0	MISSENSE, INFRAME, TRUNCATING MUTATIONS (PUTATIVE DRIVER)	0	0
IL6	ALL	25	0.025227	AMPLIFICATION	9	0.00908174	DEEP DELETION	1	0.00100908	mRNA HIGH	15	0.0151362	mRNA LOW	0	0	FUSION	0	0	MISSENSE, INFRAME, TRUNCATING MUTATIONS (PUTATIVE DRIVER)	0	0
IL6R	ALL	131	0.13219	AMPLIFICATION	90	0.0908174	DEEP DELETION	0	0	mRNA HIGH	41	0.0413724	mRNA LOW	0	0	FUSION	0	0	MISSENSE, INFRAME, TRUNCATING MUTATIONS (PUTATIVE DRIVER)	0	0
INS	ALL	14	0.0141271	AMPLIFICATION	2	0.00201816	DEEP DELETION	7	0.00706357	mRNA HIGH	5	0.00504541	mRNA LOW	0	0	FUSION	0	0	MISSENSE, INFRAME, TRUNCATING MUTATIONS (PUTATIVE DRIVER)	0	0
INSR	ALL	66	0.0665994	AMPLIFICATION	8	0.00807265	DEEP DELETION	5	0.00504541	mRNA HIGH	51	0.0514632	mRNA LOW	0	0	FUSION	2	0.00201816	MISSENSE, INFRAME, TRUNCATING MUTATIONS (PUTATIVE DRIVER)	0	0
ITPR1	ALL	54	0.0544904	AMPLIFICATION	18	0.0181635	DEEP DELETION	7	0.00706357	mRNA HIGH	28	0.0282543	mRNA LOW	0	0	FUSION	1	0.00100908	MISSENSE, INFRAME, TRUNCATING MUTATIONS (PUTATIVE DRIVER)	0	0
ITPR2	ALL	55	0.0554995	AMPLIFICATION	21	0.0211907	DEEP DELETION	5	0.00504541	mRNA HIGH	27	0.0272452	mRNA LOW	0	0	FUSION	2	0.00201816	MISSENSE, INFRAME, TRUNCATING MUTATIONS (PUTATIVE DRIVER)	0	0
KCNK3	ALL	31	0.0312815	AMPLIFICATION	3	0.00302725	DEEP DELETION	0	0	mRNA HIGH	28	0.0282543	mRNA LOW	0	0	FUSION	0	0	MISSENSE, INFRAME, TRUNCATING MUTATIONS (PUTATIVE DRIVER)	0	0
KCNMA1	ALL	65	0.0655903	AMPLIFICATION	17	0.0171544	DEEP DELETION	2	0.00201816	mRNA HIGH	40	0.0403633	mRNA LOW	0	0	FUSION	6	0.00605449	MISSENSE, INFRAME, TRUNCATING MUTATIONS (PUTATIVE DRIVER)	0	0
LDHA	ALL	72	0.0726539	AMPLIFICATION	8	0.00807265	DEEP DELETION	0	0	mRNA HIGH	64	0.0645812	mRNA LOW	0	0	FUSION	0	0	MISSENSE, INFRAME, TRUNCATING MUTATIONS (PUTATIVE DRIVER)	0	0
LDHAL6A	ALL	17	0.0171544	AMPLIFICATION	7	0.00706357	DEEP DELETION	0	0	mRNA HIGH	10	0.0100908	mRNA LOW	0	0	FUSION	0	0	MISSENSE, INFRAME, TRUNCATING MUTATIONS (PUTATIVE DRIVER)	0	0
LDHAL6B	ALL	55	0.0554995	AMPLIFICATION	2	0.00201816	DEEP DELETION	4	0.00403633	mRNA HIGH	49	0.049445	mRNA LOW	0	0	FUSION	0	0	MISSENSE, INFRAME, TRUNCATING MUTATIONS (PUTATIVE DRIVER)	0	0
LDHB	ALL	100	0.100908	AMPLIFICATION	8	0.00807265	DEEP DELETION	3	0.00302725	mRNA HIGH	89	0.0898083	mRNA LOW	0	0	FUSION	0	0	MISSENSE, INFRAME, TRUNCATING MUTATIONS (PUTATIVE DRIVER)	0	0
LDHC	ALL	61	0.061554	AMPLIFICATION	8	0.00807265	DEEP DELETION	0	0	mRNA HIGH	53	0.0534813	mRNA LOW	0	0	FUSION	0	0	MISSENSE, INFRAME, TRUNCATING MUTATIONS (PUTATIVE DRIVER)	0	0
LMNA	ALL	160	0.161453	AMPLIFICATION	80	0.0807265	DEEP DELETION	0	0	mRNA HIGH	80	0.0807265	mRNA LOW	0	0	FUSION	0	0	MISSENSE, INFRAME, TRUNCATING MUTATIONS (PUTATIVE DRIVER)	0	0
LTBR	ALL	107	0.107972	AMPLIFICATION	16	0.0161453	DEEP DELETION	1	0.00100908	mRNA HIGH	90	0.0908174	mRNA LOW	0	0	FUSION	0	0	MISSENSE, INFRAME, TRUNCATING MUTATIONS (PUTATIVE DRIVER)	0	0
MAP2K1	ALL	64	0.0645812	AMPLIFICATION	6	0.00605449	DEEP DELETION	0	0	mRNA HIGH	50	0.0504541	mRNA LOW	6	0.00605449	FUSION	1	0.00100908	MISSENSE, INFRAME, TRUNCATING MUTATIONS (PUTATIVE DRIVER)	1	0.00100908
MAP2K2	ALL	58	0.0585267	AMPLIFICATION	7	0.00706357	DEEP DELETION	3	0.00302725	mRNA HIGH	47	0.0474268	mRNA LOW	0	0	FUSION	1	0.00100908	MISSENSE, INFRAME, TRUNCATING MUTATIONS (PUTATIVE DRIVER)	0	0
MAPK1	ALL	125	0.126135	AMPLIFICATION	5	0.00504541	DEEP DELETION	1	0.00100908	mRNA HIGH	53	0.0534813	mRNA LOW	63	0.0635721	FUSION	2	0.00201816	MISSENSE, INFRAME, TRUNCATING MUTATIONS (PUTATIVE DRIVER)	1	0.00100908
MAPK3	ALL	149	0.150353	AMPLIFICATION	42	0.0423814	DEEP DELETION	0	0	mRNA HIGH	104	0.104945	mRNA LOW	3	0.00302725	FUSION	0	0	MISSENSE, INFRAME, TRUNCATING MUTATIONS (PUTATIVE DRIVER)	0	0
MDM2	ALL	104	0.104945	AMPLIFICATION	28	0.0282543	DEEP DELETION	0	0	mRNA HIGH	75	0.0756811	mRNA LOW	0	0	FUSION	1	0.00100908	MISSENSE, INFRAME, TRUNCATING MUTATIONS (PUTATIVE DRIVER)	0	0
MDM4	ALL	268	0.270434	AMPLIFICATION	89	0.0898083	DEEP DELETION	0	0	mRNA HIGH	178	0.179617	mRNA LOW	0	0	FUSION	1	0.00100908	MISSENSE, INFRAME, TRUNCATING MUTATIONS (PUTATIVE DRIVER)	0	0
MKNK1	ALL	64	0.0645812	AMPLIFICATION	7	0.00706357	DEEP DELETION	0	0	mRNA HIGH	33	0.0332997	mRNA LOW	24	0.024218	FUSION	0	0	MISSENSE, INFRAME, TRUNCATING MUTATIONS (PUTATIVE DRIVER)	0	0
MKNK2	ALL	36	0.0363269	AMPLIFICATION	0	0	DEEP DELETION	10	0.0100908	mRNA HIGH	24	0.024218	mRNA LOW	0	0	FUSION	2	0.00201816	MISSENSE, INFRAME, TRUNCATING MUTATIONS (PUTATIVE DRIVER)	0	0
MMP14	ALL	53	0.0534813	AMPLIFICATION	15	0.0151362	DEEP DELETION	0	0	mRNA HIGH	37	0.037336	mRNA LOW	0	0	FUSION	1	0.00100908	MISSENSE, INFRAME, TRUNCATING MUTATIONS (PUTATIVE DRIVER)	0	0
MMP2	ALL	51	0.0514632	AMPLIFICATION	9	0.00908174	DEEP DELETION	12	0.012109	mRNA HIGH	29	0.0292634	mRNA LOW	0	0	FUSION	1	0.00100908	MISSENSE, INFRAME, TRUNCATING MUTATIONS (PUTATIVE DRIVER)	0	0
MMP3	ALL	36	0.0363269	AMPLIFICATION	3	0.00302725	DEEP DELETION	11	0.0110999	mRNA HIGH	22	0.0221998	mRNA LOW	0	0	FUSION	0	0	MISSENSE, INFRAME, TRUNCATING MUTATIONS (PUTATIVE DRIVER)	0	0
MT3	ALL	36	0.0363269	AMPLIFICATION	3	0.00302725	DEEP DELETION	11	0.0110999	mRNA HIGH	22	0.0221998	mRNA LOW	0	0	FUSION	0	0	MISSENSE, INFRAME, TRUNCATING MUTATIONS (PUTATIVE DRIVER)	0	0
MTOR	ALL	74	0.074672	AMPLIFICATION	1	0.00100908	DEEP DELETION	4	0.00403633	mRNA HIGH	27	0.0272452	mRNA LOW	38	0.0383451	FUSION	2	0.00201816	MISSENSE, INFRAME, TRUNCATING MUTATIONS (PUTATIVE DRIVER)	2	0.00201816
NDRG1	ALL	235	0.237134	AMPLIFICATION	118	0.119072	DEEP DELETION	2	0.00201816	mRNA HIGH	115	0.116044	mRNA LOW	0	0	FUSION	0	0	MISSENSE, INFRAME, TRUNCATING MUTATIONS (PUTATIVE DRIVER)	0	0
NFKB1	ALL	42	0.0423814	AMPLIFICATION	4	0.00403633	DEEP DELETION	1	0.00100908	mRNA HIGH	34	0.0343088	mRNA LOW	3	0.00302725	FUSION	0	0	MISSENSE, INFRAME, TRUNCATING MUTATIONS (PUTATIVE DRIVER)	0	0
NOS1	ALL	6	0.00605449	AMPLIFICATION	2	0.00201816	DEEP DELETION	2	0.00201816	mRNA HIGH	2	0.00201816	mRNA LOW	0	0	FUSION	0	0	MISSENSE, INFRAME, TRUNCATING MUTATIONS (PUTATIVE DRIVER)	0	0
NOS2	ALL	36	0.0363269	AMPLIFICATION	32	0.0322906	DEEP DELETION	1	0.00100908	mRNA HIGH	3	0.00302725	mRNA LOW	0	0	FUSION	0	0	MISSENSE, INFRAME, TRUNCATING MUTATIONS (PUTATIVE DRIVER)	0	0
NOS3	ALL	44	0.0443996	AMPLIFICATION	5	0.00504541	DEEP DELETION	3	0.00302725	mRNA HIGH	36	0.0363269	mRNA LOW	0	0	FUSION	0	0	MISSENSE, INFRAME, TRUNCATING MUTATIONS (PUTATIVE DRIVER)	0	0
NOTCH1	ALL	73	0.073663	AMPLIFICATION	8	0.00807265	DEEP DELETION	3	0.00302725	mRNA HIGH	60	0.0605449	mRNA LOW	0	0	FUSION	0	0	MISSENSE, INFRAME, TRUNCATING MUTATIONS (PUTATIVE DRIVER)	2	0.00201816
NPEPPS	ALL	108	0.108981	AMPLIFICATION	23	0.0232089	DEEP DELETION	2	0.00201816	mRNA HIGH	78	0.0787084	mRNA LOW	0	0	FUSION	5	0.00504541	MISSENSE, INFRAME, TRUNCATING MUTATIONS (PUTATIVE DRIVER)	0	0
NPPA	ALL	31	0.0312815	AMPLIFICATION	1	0.00100908	DEEP DELETION	3	0.00302725	mRNA HIGH	27	0.0272452	mRNA LOW	0	0	FUSION	0	0	MISSENSE, INFRAME, TRUNCATING MUTATIONS (PUTATIVE DRIVER)	0	0
NPPB	ALL	10	0.0100908	AMPLIFICATION	1	0.00100908	DEEP DELETION	3	0.00302725	mRNA HIGH	6	0.00605449	mRNA LOW	0	0	FUSION	0	0	MISSENSE, INFRAME, TRUNCATING MUTATIONS (PUTATIVE DRIVER)	0	0
NR4A2	ALL	36	0.0363269	AMPLIFICATION	0	0	DEEP DELETION	2	0.00201816	mRNA HIGH	34	0.0343088	mRNA LOW	0	0	FUSION	0	0	MISSENSE, INFRAME, TRUNCATING MUTATIONS (PUTATIVE DRIVER)	0	0
NRP1	ALL	43	0.0433905	AMPLIFICATION	5	0.00504541	DEEP DELETION	0	0	mRNA HIGH	37	0.037336	mRNA LOW	0	0	FUSION	1	0.00100908	MISSENSE, INFRAME, TRUNCATING MUTATIONS (PUTATIVE DRIVER)	0	0
NRP2	ALL	58	0.0585267	AMPLIFICATION	4	0.00403633	DEEP DELETION	5	0.00504541	mRNA HIGH	48	0.0484359	mRNA LOW	0	0	FUSION	1	0.00100908	MISSENSE, INFRAME, TRUNCATING MUTATIONS (PUTATIVE DRIVER)	0	0
OS9	ALL	87	0.0877901	AMPLIFICATION	14	0.0141271	DEEP DELETION	0	0	mRNA HIGH	60	0.0605449	mRNA LOW	11	0.0110999	FUSION	2	0.00201816	MISSENSE, INFRAME, TRUNCATING MUTATIONS (PUTATIVE DRIVER)	0	0
PAM	ALL	34	0.0343088	AMPLIFICATION	1	0.00100908	DEEP DELETION	6	0.00605449	mRNA HIGH	27	0.0272452	mRNA LOW	0	0	FUSION	0	0	MISSENSE, INFRAME, TRUNCATING MUTATIONS (PUTATIVE DRIVER)	0	0
PDE5A	ALL	32	0.0322906	AMPLIFICATION	6	0.00605449	DEEP DELETION	0	0	mRNA HIGH	26	0.0262361	mRNA LOW	0	0	FUSION	0	0	MISSENSE, INFRAME, TRUNCATING MUTATIONS (PUTATIVE DRIVER)	0	0
PDGFB	ALL	47	0.0474268	AMPLIFICATION	2	0.00201816	DEEP DELETION	2	0.00201816	mRNA HIGH	42	0.0423814	mRNA LOW	0	0	FUSION	1	0.00100908	MISSENSE, INFRAME, TRUNCATING MUTATIONS (PUTATIVE DRIVER)	0	0
PDHA1	ALL	86	0.086781	AMPLIFICATION	8	0.00807265	DEEP DELETION	1	0.00100908	mRNA HIGH	76	0.0766902	mRNA LOW	0	0	FUSION	1	0.00100908	MISSENSE, INFRAME, TRUNCATING MUTATIONS (PUTATIVE DRIVER)	0	0
PDHA2	ALL	28	0.0282543	AMPLIFICATION	4	0.00403633	DEEP DELETION	1	0.00100908	mRNA HIGH	23	0.0232089	mRNA LOW	0	0	FUSION	0	0	MISSENSE, INFRAME, TRUNCATING MUTATIONS (PUTATIVE DRIVER)	0	0
PDHB	ALL	44	0.0443996	AMPLIFICATION	0	0	DEEP DELETION	4	0.00403633	mRNA HIGH	33	0.0332997	mRNA LOW	7	0.00706357	FUSION	0	0	MISSENSE, INFRAME, TRUNCATING MUTATIONS (PUTATIVE DRIVER)	0	0
PDIA2	ALL	53	0.0534813	AMPLIFICATION	39	0.0393542	DEEP DELETION	2	0.00201816	mRNA HIGH	12	0.012109	mRNA LOW	0	0	FUSION	0	0	MISSENSE, INFRAME, TRUNCATING MUTATIONS (PUTATIVE DRIVER)	0	0
PDK1	ALL	63	0.0635721	AMPLIFICATION	3	0.00302725	DEEP DELETION	1	0.00100908	mRNA HIGH	59	0.0595358	mRNA LOW	0	0	FUSION	0	0	MISSENSE, INFRAME, TRUNCATING MUTATIONS (PUTATIVE DRIVER)	0	0
PFKFB3	ALL	66	0.0665994	AMPLIFICATION	31	0.0312815	DEEP DELETION	0	0	mRNA HIGH	35	0.0353179	mRNA LOW	0	0	FUSION	0	0	MISSENSE, INFRAME, TRUNCATING MUTATIONS (PUTATIVE DRIVER)	0	0
PFKL	ALL	91	0.0918264	AMPLIFICATION	9	0.00908174	DEEP DELETION	1	0.00100908	mRNA HIGH	76	0.0766902	mRNA LOW	4	0.00403633	FUSION	1	0.00100908	MISSENSE, INFRAME, TRUNCATING MUTATIONS (PUTATIVE DRIVER)	0	0
PFKM	ALL	54	0.0544904	AMPLIFICATION	3	0.00302725	DEEP DELETION	0	0	mRNA HIGH	51	0.0514632	mRNA LOW	0	0	FUSION	0	0	MISSENSE, INFRAME, TRUNCATING MUTATIONS (PUTATIVE DRIVER)	0	0
PFKP	ALL	150	0.151362	AMPLIFICATION	26	0.0262361	DEEP DELETION	4	0.00403633	mRNA HIGH	120	0.12109	mRNA LOW	0	0	FUSION	0	0	MISSENSE, INFRAME, TRUNCATING MUTATIONS (PUTATIVE DRIVER)	0	0
PGF	ALL	39	0.0393542	AMPLIFICATION	2	0.00201816	DEEP DELETION	1	0.00100908	mRNA HIGH	36	0.0363269	mRNA LOW	0	0	FUSION	0	0	MISSENSE, INFRAME, TRUNCATING MUTATIONS (PUTATIVE DRIVER)	0	0
PGK1	ALL	60	0.0605449	AMPLIFICATION	3	0.00302725	DEEP DELETION	1	0.00100908	mRNA HIGH	55	0.0554995	mRNA LOW	0	0	FUSION	1	0.00100908	MISSENSE, INFRAME, TRUNCATING MUTATIONS (PUTATIVE DRIVER)	0	0
PGK2	ALL	61	0.061554	AMPLIFICATION	11	0.0110999	DEEP DELETION	4	0.00403633	mRNA HIGH	46	0.0464178	mRNA LOW	0	0	FUSION	0	0	MISSENSE, INFRAME, TRUNCATING MUTATIONS (PUTATIVE DRIVER)	0	0
PIK3CA	ALL	437	0.440969	AMPLIFICATION	33	0.0332997	DEEP DELETION	0	0	mRNA HIGH	64	0.0645812	mRNA LOW	0	0	FUSION	2	0.00201816	MISSENSE, INFRAME, TRUNCATING MUTATIONS (PUTATIVE DRIVER)	338	0.34107
PIK3CB	ALL	78	0.0787084	AMPLIFICATION	6	0.00605449	DEEP DELETION	0	0	mRNA HIGH	64	0.0645812	mRNA LOW	3	0.00302725	FUSION	2	0.00201816	MISSENSE, INFRAME, TRUNCATING MUTATIONS (PUTATIVE DRIVER)	3	0.00302725
PIK3CD	ALL	44	0.0443996	AMPLIFICATION	4	0.00403633	DEEP DELETION	5	0.00504541	mRNA HIGH	35	0.0353179	mRNA LOW	0	0	FUSION	0	0	MISSENSE, INFRAME, TRUNCATING MUTATIONS (PUTATIVE DRIVER)	0	0
PIK3CG	ALL	39	0.0393542	AMPLIFICATION	6	0.00605449	DEEP DELETION	1	0.00100908	mRNA HIGH	31	0.0312815	mRNA LOW	0	0	FUSION	1	0.00100908	MISSENSE, INFRAME, TRUNCATING MUTATIONS (PUTATIVE DRIVER)	0	0
PIK3R1	ALL	66	0.0665994	AMPLIFICATION	0	0	DEEP DELETION	10	0.0100908	mRNA HIGH	35	0.0353179	mRNA LOW	0	0	FUSION	1	0.00100908	MISSENSE, INFRAME, TRUNCATING MUTATIONS (PUTATIVE DRIVER)	20	0.0201816
PIK3R2	ALL	74	0.074672	AMPLIFICATION	13	0.0131181	DEEP DELETION	0	0	mRNA HIGH	61	0.061554	mRNA LOW	0	0	FUSION	0	0	MISSENSE, INFRAME, TRUNCATING MUTATIONS (PUTATIVE DRIVER)	0	0
PIK3R3	ALL	51	0.0514632	AMPLIFICATION	6	0.00605449	DEEP DELETION	0	0	mRNA HIGH	40	0.0403633	mRNA LOW	0	0	FUSION	2	0.00201816	MISSENSE, INFRAME, TRUNCATING MUTATIONS (PUTATIVE DRIVER)	3	0.00302725
PKLR	ALL	114	0.115035	AMPLIFICATION	90	0.0908174	DEEP DELETION	0	0	mRNA HIGH	24	0.024218	mRNA LOW	0	0	FUSION	0	0	MISSENSE, INFRAME, TRUNCATING MUTATIONS (PUTATIVE DRIVER)	0	0
PLCG1	ALL	99	0.0998991	AMPLIFICATION	12	0.012109	DEEP DELETION	0	0	mRNA HIGH	83	0.0837538	mRNA LOW	1	0.00100908	FUSION	3	0.00302725	MISSENSE, INFRAME, TRUNCATING MUTATIONS (PUTATIVE DRIVER)	0	0
PLCG2	ALL	35	0.0353179	AMPLIFICATION	2	0.00201816	DEEP DELETION	18	0.0181635	mRNA HIGH	15	0.0151362	mRNA LOW	0	0	FUSION	0	0	MISSENSE, INFRAME, TRUNCATING MUTATIONS (PUTATIVE DRIVER)	0	0
PLOD1	ALL	48	0.0484359	AMPLIFICATION	1	0.00100908	DEEP DELETION	3	0.00302725	mRNA HIGH	44	0.0443996	mRNA LOW	0	0	FUSION	0	0	MISSENSE, INFRAME, TRUNCATING MUTATIONS (PUTATIVE DRIVER)	0	0
PLOD2	ALL	84	0.0847629	AMPLIFICATION	9	0.00908174	DEEP DELETION	0	0	mRNA HIGH	74	0.074672	mRNA LOW	0	0	FUSION	1	0.00100908	MISSENSE, INFRAME, TRUNCATING MUTATIONS (PUTATIVE DRIVER)	0	0
PMAIP1	ALL	53	0.0534813	AMPLIFICATION	5	0.00504541	DEEP DELETION	6	0.00605449	mRNA HIGH	42	0.0423814	mRNA LOW	0	0	FUSION	0	0	MISSENSE, INFRAME, TRUNCATING MUTATIONS (PUTATIVE DRIVER)	0	0
PML	ALL	76	0.0766902	AMPLIFICATION	9	0.00908174	DEEP DELETION	1	0.00100908	mRNA HIGH	66	0.0665994	mRNA LOW	0	0	FUSION	0	0	MISSENSE, INFRAME, TRUNCATING MUTATIONS (PUTATIVE DRIVER)	0	0
POLR2A	ALL	40	0.0403633	AMPLIFICATION	0	0	DEEP DELETION	5	0.00504541	mRNA HIGH	13	0.0131181	mRNA LOW	20	0.0201816	FUSION	2	0.00201816	MISSENSE, INFRAME, TRUNCATING MUTATIONS (PUTATIVE DRIVER)	0	0
PPARA	ALL	64	0.0645812	AMPLIFICATION	2	0.00201816	DEEP DELETION	4	0.00403633	mRNA HIGH	58	0.0585267	mRNA LOW	0	0	FUSION	0	0	MISSENSE, INFRAME, TRUNCATING MUTATIONS (PUTATIVE DRIVER)	0	0
PRKAA1	ALL	69	0.0696266	AMPLIFICATION	8	0.00807265	DEEP DELETION	2	0.00201816	mRNA HIGH	58	0.0585267	mRNA LOW	0	0	FUSION	1	0.00100908	MISSENSE, INFRAME, TRUNCATING MUTATIONS (PUTATIVE DRIVER)	0	0
PRKAA2	ALL	58	0.0585267	AMPLIFICATION	14	0.0141271	DEEP DELETION	0	0	mRNA HIGH	43	0.0433905	mRNA LOW	0	0	FUSION	1	0.00100908	MISSENSE, INFRAME, TRUNCATING MUTATIONS (PUTATIVE DRIVER)	0	0
PRKCA	ALL	132	0.133199	AMPLIFICATION	71	0.0716448	DEEP DELETION	1	0.00100908	mRNA HIGH	49	0.049445	mRNA LOW	0	0	FUSION	11	0.0110999	MISSENSE, INFRAME, TRUNCATING MUTATIONS (PUTATIVE DRIVER)	0	0
PRKCB	ALL	59	0.0595358	AMPLIFICATION	37	0.037336	DEEP DELETION	0	0	mRNA HIGH	22	0.0221998	mRNA LOW	0	0	FUSION	0	0	MISSENSE, INFRAME, TRUNCATING MUTATIONS (PUTATIVE DRIVER)	0	0
PRKCG	ALL	47	0.0474268	AMPLIFICATION	14	0.0141271	DEEP DELETION	1	0.00100908	mRNA HIGH	32	0.0322906	mRNA LOW	0	0	FUSION	0	0	MISSENSE, INFRAME, TRUNCATING MUTATIONS (PUTATIVE DRIVER)	0	0
PSEN2	ALL	344	0.347124	AMPLIFICATION	90	0.0908174	DEEP DELETION	0	0	mRNA HIGH	248	0.250252	mRNA LOW	6	0.00605449	FUSION	0	0	MISSENSE, INFRAME, TRUNCATING MUTATIONS (PUTATIVE DRIVER)	0	0
PSMC3	ALL	82	0.0827447	AMPLIFICATION	7	0.00706357	DEEP DELETION	1	0.00100908	mRNA HIGH	72	0.0726539	mRNA LOW	2	0.00201816	FUSION	0	0	MISSENSE, INFRAME, TRUNCATING MUTATIONS (PUTATIVE DRIVER)	0	0
RBX1	ALL	45	0.0454087	AMPLIFICATION	1	0.00100908	DEEP DELETION	2	0.00201816	mRNA HIGH	42	0.0423814	mRNA LOW	0	0	FUSION	0	0	MISSENSE, INFRAME, TRUNCATING MUTATIONS (PUTATIVE DRIVER)	0	0
RELA	ALL	157	0.158426	AMPLIFICATION	15	0.0151362	DEEP DELETION	1	0.00100908	mRNA HIGH	84	0.0847629	mRNA LOW	57	0.0575177	FUSION	0	0	MISSENSE, INFRAME, TRUNCATING MUTATIONS (PUTATIVE DRIVER)	0	0
RPS6	ALL	63	0.0635721	AMPLIFICATION	7	0.00706357	DEEP DELETION	0	0	mRNA HIGH	56	0.0565086	mRNA LOW	0	0	FUSION	0	0	MISSENSE, INFRAME, TRUNCATING MUTATIONS (PUTATIVE DRIVER)	0	0
RPS6KB1	ALL	329	0.331988	AMPLIFICATION	88	0.0887992	DEEP DELETION	0	0	mRNA HIGH	219	0.220989	mRNA LOW	18	0.0181635	FUSION	4	0.00403633	MISSENSE, INFRAME, TRUNCATING MUTATIONS (PUTATIVE DRIVER)	0	0
RPS6KB2	ALL	163	0.16448	AMPLIFICATION	63	0.0635721	DEEP DELETION	0	0	mRNA HIGH	97	0.0978809	mRNA LOW	0	0	FUSION	3	0.00302725	MISSENSE, INFRAME, TRUNCATING MUTATIONS (PUTATIVE DRIVER)	0	0
RYR1	ALL	60	0.0605449	AMPLIFICATION	19	0.0191726	DEEP DELETION	0	0	mRNA HIGH	41	0.0413724	mRNA LOW	0	0	FUSION	0	0	MISSENSE, INFRAME, TRUNCATING MUTATIONS (PUTATIVE DRIVER)	0	0
SATB1	ALL	18	0.0181635	AMPLIFICATION	7	0.00706357	DEEP DELETION	1	0.00100908	mRNA HIGH	10	0.0100908	mRNA LOW	0	0	FUSION	0	0	MISSENSE, INFRAME, TRUNCATING MUTATIONS (PUTATIVE DRIVER)	0	0
SCNN1B	ALL	78	0.0787084	AMPLIFICATION	36	0.0363269	DEEP DELETION	0	0	mRNA HIGH	42	0.0423814	mRNA LOW	0	0	FUSION	0	0	MISSENSE, INFRAME, TRUNCATING MUTATIONS (PUTATIVE DRIVER)	0	0
SERPINE1	ALL	28	0.0282543	AMPLIFICATION	5	0.00504541	DEEP DELETION	1	0.00100908	mRNA HIGH	22	0.0221998	mRNA LOW	0	0	FUSION	0	0	MISSENSE, INFRAME, TRUNCATING MUTATIONS (PUTATIVE DRIVER)	0	0
SFRP1	ALL	138	0.139253	AMPLIFICATION	83	0.0837538	DEEP DELETION	9	0.00908174	mRNA HIGH	45	0.0454087	mRNA LOW	0	0	FUSION	1	0.00100908	MISSENSE, INFRAME, TRUNCATING MUTATIONS (PUTATIVE DRIVER)	0	0
SHC1	ALL	171	0.172553	AMPLIFICATION	96	0.0968718	DEEP DELETION	0	0	mRNA HIGH	74	0.074672	mRNA LOW	0	0	FUSION	1	0.00100908	MISSENSE, INFRAME, TRUNCATING MUTATIONS (PUTATIVE DRIVER)	0	0
SLC29A1	ALL	74	0.074672	AMPLIFICATION	14	0.0141271	DEEP DELETION	3	0.00302725	mRNA HIGH	57	0.0575177	mRNA LOW	0	0	FUSION	0	0	MISSENSE, INFRAME, TRUNCATING MUTATIONS (PUTATIVE DRIVER)	0	0
SLC2A1	ALL	59	0.0595358	AMPLIFICATION	12	0.012109	DEEP DELETION	0	0	mRNA HIGH	46	0.0464178	mRNA LOW	0	0	FUSION	1	0.00100908	MISSENSE, INFRAME, TRUNCATING MUTATIONS (PUTATIVE DRIVER)	0	0
SLC8A1	ALL	49	0.049445	AMPLIFICATION	3	0.00302725	DEEP DELETION	1	0.00100908	mRNA HIGH	45	0.0454087	mRNA LOW	0	0	FUSION	0	0	MISSENSE, INFRAME, TRUNCATING MUTATIONS (PUTATIVE DRIVER)	0	0
SMAD3	ALL	37	0.037336	AMPLIFICATION	4	0.00403633	DEEP DELETION	0	0	mRNA HIGH	30	0.0302725	mRNA LOW	0	0	FUSION	3	0.00302725	MISSENSE, INFRAME, TRUNCATING MUTATIONS (PUTATIVE DRIVER)	0	0
SMAD4	ALL	141	0.142281	AMPLIFICATION	2	0.00201816	DEEP DELETION	7	0.00706357	mRNA HIGH	56	0.0565086	mRNA LOW	67	0.0676085	FUSION	0	0	MISSENSE, INFRAME, TRUNCATING MUTATIONS (PUTATIVE DRIVER)	9	0.00908174
SNAI3	ALL	54	0.0544904	AMPLIFICATION	4	0.00403633	DEEP DELETION	24	0.024218	mRNA HIGH	26	0.0262361	mRNA LOW	0	0	FUSION	0	0	MISSENSE, INFRAME, TRUNCATING MUTATIONS (PUTATIVE DRIVER)	0	0
SOD2	ALL	47	0.0474268	AMPLIFICATION	4	0.00403633	DEEP DELETION	9	0.00908174	mRNA HIGH	34	0.0343088	mRNA LOW	0	0	FUSION	0	0	MISSENSE, INFRAME, TRUNCATING MUTATIONS (PUTATIVE DRIVER)	0	0
SOD3	ALL	37	0.037336	AMPLIFICATION	1	0.00100908	DEEP DELETION	4	0.00403633	mRNA HIGH	32	0.0322906	mRNA LOW	0	0	FUSION	0	0	MISSENSE, INFRAME, TRUNCATING MUTATIONS (PUTATIVE DRIVER)	0	0
SPRY2	ALL	45	0.0454087	AMPLIFICATION	4	0.00403633	DEEP DELETION	5	0.00504541	mRNA HIGH	36	0.0363269	mRNA LOW	0	0	FUSION	0	0	MISSENSE, INFRAME, TRUNCATING MUTATIONS (PUTATIVE DRIVER)	0	0
STAT3	ALL	83	0.0837538	AMPLIFICATION	11	0.0110999	DEEP DELETION	2	0.00201816	mRNA HIGH	40	0.0403633	mRNA LOW	25	0.025227	FUSION	3	0.00302725	MISSENSE, INFRAME, TRUNCATING MUTATIONS (PUTATIVE DRIVER)	2	0.00201816
STAT5B	ALL	74	0.074672	AMPLIFICATION	10	0.0100908	DEEP DELETION	2	0.00201816	mRNA HIGH	33	0.0332997	mRNA LOW	27	0.0272452	FUSION	2	0.00201816	MISSENSE, INFRAME, TRUNCATING MUTATIONS (PUTATIVE DRIVER)	0	0
STC1	ALL	58	0.0585267	AMPLIFICATION	1	0.00100908	DEEP DELETION	43	0.0433905	mRNA HIGH	14	0.0141271	mRNA LOW	0	0	FUSION	0	0	MISSENSE, INFRAME, TRUNCATING MUTATIONS (PUTATIVE DRIVER)	0	0
STC2	ALL	58	0.0585267	AMPLIFICATION	10	0.0100908	DEEP DELETION	2	0.00201816	mRNA HIGH	46	0.0464178	mRNA LOW	0	0	FUSION	0	0	MISSENSE, INFRAME, TRUNCATING MUTATIONS (PUTATIVE DRIVER)	0	0
TEK	ALL	42	0.0423814	AMPLIFICATION	10	0.0100908	DEEP DELETION	5	0.00504541	mRNA HIGH	27	0.0272452	mRNA LOW	0	0	FUSION	0	0	MISSENSE, INFRAME, TRUNCATING MUTATIONS (PUTATIVE DRIVER)	0	0
TF	ALL	20	0.0201816	AMPLIFICATION	3	0.00302725	DEEP DELETION	0	0	mRNA HIGH	17	0.0171544	mRNA LOW	0	0	FUSION	0	0	MISSENSE, INFRAME, TRUNCATING MUTATIONS (PUTATIVE DRIVER)	0	0
TFRC	ALL	138	0.139253	AMPLIFICATION	23	0.0232089	DEEP DELETION	1	0.00100908	mRNA HIGH	114	0.115035	mRNA LOW	0	0	FUSION	0	0	MISSENSE, INFRAME, TRUNCATING MUTATIONS (PUTATIVE DRIVER)	0	0
TGFA	ALL	63	0.0635721	AMPLIFICATION	4	0.00403633	DEEP DELETION	0	0	mRNA HIGH	58	0.0585267	mRNA LOW	0	0	FUSION	1	0.00100908	MISSENSE, INFRAME, TRUNCATING MUTATIONS (PUTATIVE DRIVER)	0	0
TGFB1	ALL	25	0.025227	AMPLIFICATION	7	0.00706357	DEEP DELETION	3	0.00302725	mRNA HIGH	15	0.0151362	mRNA LOW	0	0	FUSION	0	0	MISSENSE, INFRAME, TRUNCATING MUTATIONS (PUTATIVE DRIVER)	0	0
TGFB2	ALL	110	0.110999	AMPLIFICATION	78	0.0787084	DEEP DELETION	0	0	mRNA HIGH	31	0.0312815	mRNA LOW	0	0	FUSION	1	0.00100908	MISSENSE, INFRAME, TRUNCATING MUTATIONS (PUTATIVE DRIVER)	0	0
TGFB3	ALL	32	0.0322906	AMPLIFICATION	3	0.00302725	DEEP DELETION	2	0.00201816	mRNA HIGH	27	0.0272452	mRNA LOW	0	0	FUSION	0	0	MISSENSE, INFRAME, TRUNCATING MUTATIONS (PUTATIVE DRIVER)	0	0
TGFBR1	ALL	29	0.0292634	AMPLIFICATION	2	0.00201816	DEEP DELETION	3	0.00302725	mRNA HIGH	24	0.024218	mRNA LOW	0	0	FUSION	0	0	MISSENSE, INFRAME, TRUNCATING MUTATIONS (PUTATIVE DRIVER)	0	0
TH	ALL	29	0.0292634	AMPLIFICATION	2	0.00201816	DEEP DELETION	7	0.00706357	mRNA HIGH	20	0.0201816	mRNA LOW	0	0	FUSION	0	0	MISSENSE, INFRAME, TRUNCATING MUTATIONS (PUTATIVE DRIVER)	0	0
THBS1	ALL	50	0.0504541	AMPLIFICATION	2	0.00201816	DEEP DELETION	6	0.00605449	mRNA HIGH	42	0.0423814	mRNA LOW	0	0	FUSION	0	0	MISSENSE, INFRAME, TRUNCATING MUTATIONS (PUTATIVE DRIVER)	0	0
TIMP1	ALL	34	0.0343088	AMPLIFICATION	11	0.0110999	DEEP DELETION	2	0.00201816	mRNA HIGH	21	0.0211907	mRNA LOW	0	0	FUSION	0	0	MISSENSE, INFRAME, TRUNCATING MUTATIONS (PUTATIVE DRIVER)	0	0
TLR4	ALL	38	0.0383451	AMPLIFICATION	6	0.00605449	DEEP DELETION	1	0.00100908	mRNA HIGH	31	0.0312815	mRNA LOW	0	0	FUSION	0	0	MISSENSE, INFRAME, TRUNCATING MUTATIONS (PUTATIVE DRIVER)	0	0
TNC	ALL	31	0.0312815	AMPLIFICATION	7	0.00706357	DEEP DELETION	0	0	mRNA HIGH	22	0.0221998	mRNA LOW	0	0	FUSION	2	0.00201816	MISSENSE, INFRAME, TRUNCATING MUTATIONS (PUTATIVE DRIVER)	0	0
TNF	ALL	65	0.0655903	AMPLIFICATION	12	0.012109	DEEP DELETION	1	0.00100908	mRNA HIGH	52	0.0524723	mRNA LOW	0	0	FUSION	0	0	MISSENSE, INFRAME, TRUNCATING MUTATIONS (PUTATIVE DRIVER)	0	0
TP53	ALL	437	0.440969	AMPLIFICATION	0	0	DEEP DELETION	9	0.00908174	mRNA HIGH	54	0.0544904	mRNA LOW	31	0.0312815	FUSION	2	0.00201816	MISSENSE, INFRAME, TRUNCATING MUTATIONS (PUTATIVE DRIVER)	341	0.344097
TSC2	ALL	201	0.202825	AMPLIFICATION	44	0.0443996	DEEP DELETION	0	0	mRNA HIGH	148	0.149344	mRNA LOW	7	0.00706357	FUSION	1	0.00100908	MISSENSE, INFRAME, TRUNCATING MUTATIONS (PUTATIVE DRIVER)	1	0.00100908
UBE2B	ALL	51	0.0514632	AMPLIFICATION	2	0.00201816	DEEP DELETION	2	0.00201816	mRNA HIGH	42	0.0423814	mRNA LOW	5	0.00504541	FUSION	0	0	MISSENSE, INFRAME, TRUNCATING MUTATIONS (PUTATIVE DRIVER)	0	0
UCP2	ALL	102	0.102926	AMPLIFICATION	37	0.037336	DEEP DELETION	2	0.00201816	mRNA HIGH	63	0.0635721	mRNA LOW	0	0	FUSION	0	0	MISSENSE, INFRAME, TRUNCATING MUTATIONS (PUTATIVE DRIVER)	0	0
USF1	ALL	287	0.289606	AMPLIFICATION	97	0.0978809	DEEP DELETION	0	0	mRNA HIGH	190	0.191726	mRNA LOW	0	0	FUSION	0	0	MISSENSE, INFRAME, TRUNCATING MUTATIONS (PUTATIVE DRIVER)	0	0
VCAM1	ALL	12	0.012109	AMPLIFICATION	3	0.00302725	DEEP DELETION	3	0.00302725	mRNA HIGH	6	0.00605449	mRNA LOW	0	0	FUSION	0	0	MISSENSE, INFRAME, TRUNCATING MUTATIONS (PUTATIVE DRIVER)	0	0
VEGFA	ALL	78	0.0787084	AMPLIFICATION	14	0.0141271	DEEP DELETION	4	0.00403633	mRNA HIGH	59	0.0595358	mRNA LOW	0	0	FUSION	1	0.00100908	MISSENSE, INFRAME, TRUNCATING MUTATIONS (PUTATIVE DRIVER)	0	0
VEGFC	ALL	29	0.0292634	AMPLIFICATION	2	0.00201816	DEEP DELETION	10	0.0100908	mRNA HIGH	17	0.0171544	mRNA LOW	0	0	FUSION	0	0	MISSENSE, INFRAME, TRUNCATING MUTATIONS (PUTATIVE DRIVER)	0	0
VHL	ALL	87	0.0877901	AMPLIFICATION	12	0.012109	DEEP DELETION	1	0.00100908	mRNA HIGH	54	0.0544904	mRNA LOW	20	0.0201816	FUSION	0	0	MISSENSE, INFRAME, TRUNCATING MUTATIONS (PUTATIVE DRIVER)	0	0
VLDLR	ALL	88	0.0887992	AMPLIFICATION	16	0.0161453	DEEP DELETION	5	0.00504541	mRNA HIGH	67	0.0676085	mRNA LOW	0	0	FUSION	0	0	MISSENSE, INFRAME, TRUNCATING MUTATIONS (PUTATIVE DRIVER)	0	0

## Sheet: ST_3
Supplementary Table 3. Frequency of genetic alterations in the hypoxia-related genes of 369 individuals with bladder urothelial carcinoma from the TCGA Pan-Cancer Atlas project (TCGA-BLCA-PanCancer).
GENE	TYPE	TOTAL	FREQUENCY	TYPE	TOTAL	FREQUENCY	TYPE	TOTAL	FREQUENCY	TYPE	TOTAL	FREQUENCY	TYPE	TOTAL	FREQUENCY	TYPE	TOTAL	FREQUENCY	TYPE	TOTAL	FREQUENCY
ACTN4	ALL	65	0.176152	AMPLIFICATION	18	0.0487805	DEEP DELETION	0	0	mRNA HIGH	45	0.122	mRNA LOW	2	0.00542005	FUSION	0	0	MISSENSE, INFRAME, TRUNCATING MUTATIONS (PUTATIVE DRIVER)	0	0
ADA	ALL	40	0.108401	AMPLIFICATION	12	0.0325203	DEEP DELETION	0	0	mRNA HIGH	28	0.076	mRNA LOW	0	0	FUSION	0	0	MISSENSE, INFRAME, TRUNCATING MUTATIONS (PUTATIVE DRIVER)	0	0
ADAM8	ALL	27	0.0731707	AMPLIFICATION	1	0.00271003	DEEP DELETION	5	0.0135501	mRNA HIGH	21	0.057	mRNA LOW	0	0	FUSION	0	0	MISSENSE, INFRAME, TRUNCATING MUTATIONS (PUTATIVE DRIVER)	0	0
ADM	ALL	9	0.0243902	AMPLIFICATION	0	0	DEEP DELETION	2	0.00542005	mRNA HIGH	7	0.019	mRNA LOW	0	0	FUSION	0	0	MISSENSE, INFRAME, TRUNCATING MUTATIONS (PUTATIVE DRIVER)	0	0
ADORA1	ALL	10	0.0271003	AMPLIFICATION	2	0.00542005	DEEP DELETION	1	0.00271003	mRNA HIGH	7	0.019	mRNA LOW	0	0	FUSION	0	0	MISSENSE, INFRAME, TRUNCATING MUTATIONS (PUTATIVE DRIVER)	0	0
ADRA1B	ALL	4	0.0108401	AMPLIFICATION	2	0.00542005	DEEP DELETION	1	0.00271003	mRNA HIGH	1	0.003	mRNA LOW	0	0	FUSION	0	0	MISSENSE, INFRAME, TRUNCATING MUTATIONS (PUTATIVE DRIVER)	0	0
AKT1	ALL	34	0.0921409	AMPLIFICATION	2	0.00542005	DEEP DELETION	5	0.0135501	mRNA HIGH	16	0.043	mRNA LOW	10	0.0271003	FUSION	0	0	MISSENSE, INFRAME, TRUNCATING MUTATIONS (PUTATIVE DRIVER)	1	0.00271003
AKT2	ALL	86	0.233062	AMPLIFICATION	10	0.0271003	DEEP DELETION	0	0	mRNA HIGH	67	0.182	mRNA LOW	9	0.0243902	FUSION	0	0	MISSENSE, INFRAME, TRUNCATING MUTATIONS (PUTATIVE DRIVER)	0	0
AKT3	ALL	36	0.097561	AMPLIFICATION	4	0.0108401	DEEP DELETION	1	0.00271003	mRNA HIGH	31	0.084	mRNA LOW	0	0	FUSION	0	0	MISSENSE, INFRAME, TRUNCATING MUTATIONS (PUTATIVE DRIVER)	0	0
ALAS2	ALL	9	0.0243902	AMPLIFICATION	0	0	DEEP DELETION	1	0.00271003	mRNA HIGH	8	0.022	mRNA LOW	0	0	FUSION	0	0	MISSENSE, INFRAME, TRUNCATING MUTATIONS (PUTATIVE DRIVER)	0	0
ALDOA	ALL	28	0.0758808	AMPLIFICATION	10	0.0271003	DEEP DELETION	0	0	mRNA HIGH	17	0.046	mRNA LOW	0	0	FUSION	1	0.00271003	MISSENSE, INFRAME, TRUNCATING MUTATIONS (PUTATIVE DRIVER)	0	0
ALDOB	ALL	16	0.0433604	AMPLIFICATION	3	0.00813008	DEEP DELETION	5	0.0135501	mRNA HIGH	8	0.022	mRNA LOW	0	0	FUSION	0	0	MISSENSE, INFRAME, TRUNCATING MUTATIONS (PUTATIVE DRIVER)	0	0
ALDOC	ALL	36	0.097561	AMPLIFICATION	15	0.0406504	DEEP DELETION	0	0	mRNA HIGH	21	0.057	mRNA LOW	0	0	FUSION	0	0	MISSENSE, INFRAME, TRUNCATING MUTATIONS (PUTATIVE DRIVER)	0	0
ANG	ALL	27	0.0731707	AMPLIFICATION	5	0.0135501	DEEP DELETION	4	0.0108401	mRNA HIGH	18	0.049	mRNA LOW	0	0	FUSION	0	0	MISSENSE, INFRAME, TRUNCATING MUTATIONS (PUTATIVE DRIVER)	0	0
ANGPT1	ALL	37	0.100271	AMPLIFICATION	26	0.0704607	DEEP DELETION	0	0	mRNA HIGH	11	0.03	mRNA LOW	0	0	FUSION	0	0	MISSENSE, INFRAME, TRUNCATING MUTATIONS (PUTATIVE DRIVER)	0	0
ANGPT2	ALL	32	0.0867209	AMPLIFICATION	1	0.00271003	DEEP DELETION	21	0.0569106	mRNA HIGH	10	0.027	mRNA LOW	0	0	FUSION	0	0	MISSENSE, INFRAME, TRUNCATING MUTATIONS (PUTATIVE DRIVER)	0	0
ANGPT4	ALL	5	0.0135501	AMPLIFICATION	1	0.00271003	DEEP DELETION	0	0	mRNA HIGH	4	0.011	mRNA LOW	0	0	FUSION	0	0	MISSENSE, INFRAME, TRUNCATING MUTATIONS (PUTATIVE DRIVER)	0	0
ANGPTL4	ALL	12	0.0325203	AMPLIFICATION	1	0.00271003	DEEP DELETION	1	0.00271003	mRNA HIGH	10	0.027	mRNA LOW	0	0	FUSION	0	0	MISSENSE, INFRAME, TRUNCATING MUTATIONS (PUTATIVE DRIVER)	0	0
AQP1	ALL	22	0.0596206	AMPLIFICATION	7	0.0189702	DEEP DELETION	2	0.00542005	mRNA HIGH	13	0.035	mRNA LOW	0	0	FUSION	0	0	MISSENSE, INFRAME, TRUNCATING MUTATIONS (PUTATIVE DRIVER)	0	0
ARG2	ALL	12	0.0325203	AMPLIFICATION	0	0	DEEP DELETION	2	0.00542005	mRNA HIGH	10	0.027	mRNA LOW	0	0	FUSION	0	0	MISSENSE, INFRAME, TRUNCATING MUTATIONS (PUTATIVE DRIVER)	0	0
ARNT	ALL	103	0.279133	AMPLIFICATION	40	0.108401	DEEP DELETION	0	0	mRNA HIGH	63	0.171	mRNA LOW	0	0	FUSION	0	0	MISSENSE, INFRAME, TRUNCATING MUTATIONS (PUTATIVE DRIVER)	0	0
ARNT2	ALL	8	0.0216802	AMPLIFICATION	1	0.00271003	DEEP DELETION	1	0.00271003	mRNA HIGH	6	0.016	mRNA LOW	0	0	FUSION	0	0	MISSENSE, INFRAME, TRUNCATING MUTATIONS (PUTATIVE DRIVER)	0	0
ASCL2	ALL	15	0.0406504	AMPLIFICATION	0	0	DEEP DELETION	0	0	mRNA HIGH	15	0.041	mRNA LOW	0	0	FUSION	0	0	MISSENSE, INFRAME, TRUNCATING MUTATIONS (PUTATIVE DRIVER)	0	0
ATP1A1	ALL	27	0.0731707	AMPLIFICATION	3	0.00813008	DEEP DELETION	0	0	mRNA HIGH	24	0.065	mRNA LOW	0	0	FUSION	0	0	MISSENSE, INFRAME, TRUNCATING MUTATIONS (PUTATIVE DRIVER)	0	0
ATP1A2	ALL	57	0.154472	AMPLIFICATION	47	0.127371	DEEP DELETION	0	0	mRNA HIGH	10	0.027	mRNA LOW	0	0	FUSION	0	0	MISSENSE, INFRAME, TRUNCATING MUTATIONS (PUTATIVE DRIVER)	0	0
ATP1B1	ALL	56	0.151762	AMPLIFICATION	31	0.0840108	DEEP DELETION	0	0	mRNA HIGH	25	0.068	mRNA LOW	0	0	FUSION	0	0	MISSENSE, INFRAME, TRUNCATING MUTATIONS (PUTATIVE DRIVER)	0	0
BACH1	ALL	22	0.0596206	AMPLIFICATION	2	0.00542005	DEEP DELETION	2	0.00542005	mRNA HIGH	18	0.049	mRNA LOW	0	0	FUSION	0	0	MISSENSE, INFRAME, TRUNCATING MUTATIONS (PUTATIVE DRIVER)	0	0
BAD	ALL	23	0.0623306	AMPLIFICATION	4	0.0108401	DEEP DELETION	0	0	mRNA HIGH	19	0.051	mRNA LOW	0	0	FUSION	0	0	MISSENSE, INFRAME, TRUNCATING MUTATIONS (PUTATIVE DRIVER)	0	0
BBC3	ALL	25	0.0677507	AMPLIFICATION	2	0.00542005	DEEP DELETION	0	0	mRNA HIGH	22	0.06	mRNA LOW	0	0	FUSION	0	0	MISSENSE, INFRAME, TRUNCATING MUTATIONS (PUTATIVE DRIVER)	1	0.00271003
BCL2	ALL	16	0.0433604	AMPLIFICATION	0	0	DEEP DELETION	6	0.0162602	mRNA HIGH	10	0.027	mRNA LOW	0	0	FUSION	0	0	MISSENSE, INFRAME, TRUNCATING MUTATIONS (PUTATIVE DRIVER)	0	0
BNIP3	ALL	14	0.0379404	AMPLIFICATION	0	0	DEEP DELETION	3	0.00813008	mRNA HIGH	11	0.03	mRNA LOW	0	0	FUSION	0	0	MISSENSE, INFRAME, TRUNCATING MUTATIONS (PUTATIVE DRIVER)	0	0
CAMK2A	ALL	14	0.0379404	AMPLIFICATION	3	0.00813008	DEEP DELETION	0	0	mRNA HIGH	11	0.03	mRNA LOW	0	0	FUSION	0	0	MISSENSE, INFRAME, TRUNCATING MUTATIONS (PUTATIVE DRIVER)	0	0
CAMK2B	ALL	16	0.0433604	AMPLIFICATION	4	0.0108401	DEEP DELETION	0	0	mRNA HIGH	11	0.03	mRNA LOW	0	0	FUSION	1	0.00271003	MISSENSE, INFRAME, TRUNCATING MUTATIONS (PUTATIVE DRIVER)	0	0
CAMK2D	ALL	18	0.0487805	AMPLIFICATION	1	0.00271003	DEEP DELETION	2	0.00542005	mRNA HIGH	15	0.041	mRNA LOW	0	0	FUSION	0	0	MISSENSE, INFRAME, TRUNCATING MUTATIONS (PUTATIVE DRIVER)	0	0
CAMK2G	ALL	33	0.0894309	AMPLIFICATION	6	0.0162602	DEEP DELETION	1	0.00271003	mRNA HIGH	25	0.068	mRNA LOW	0	0	FUSION	1	0.00271003	MISSENSE, INFRAME, TRUNCATING MUTATIONS (PUTATIVE DRIVER)	0	0
CASR	ALL	14	0.0379404	AMPLIFICATION	4	0.0108401	DEEP DELETION	1	0.00271003	mRNA HIGH	8	0.022	mRNA LOW	0	0	FUSION	1	0.00271003	MISSENSE, INFRAME, TRUNCATING MUTATIONS (PUTATIVE DRIVER)	0	0
CAV1	ALL	24	0.0650407	AMPLIFICATION	7	0.0189702	DEEP DELETION	1	0.00271003	mRNA HIGH	16	0.043	mRNA LOW	0	0	FUSION	0	0	MISSENSE, INFRAME, TRUNCATING MUTATIONS (PUTATIVE DRIVER)	0	0
CCL2	ALL	23	0.0623306	AMPLIFICATION	10	0.0271003	DEEP DELETION	0	0	mRNA HIGH	13	0.035	mRNA LOW	0	0	FUSION	0	0	MISSENSE, INFRAME, TRUNCATING MUTATIONS (PUTATIVE DRIVER)	0	0
CD24	ALL	0	0	AMPLIFICATION	0	0	DEEP DELETION	0	0	mRNA HIGH	0	0	mRNA LOW	0	0	FUSION	0	0	MISSENSE, INFRAME, TRUNCATING MUTATIONS (PUTATIVE DRIVER)	0	0
CDH1	ALL	39	0.105691	AMPLIFICATION	8	0.0216802	DEEP DELETION	3	0.00813008	mRNA HIGH	23	0.062	mRNA LOW	0	0	FUSION	0	0	MISSENSE, INFRAME, TRUNCATING MUTATIONS (PUTATIVE DRIVER)	5	0.0135501
CDKN1A	ALL	47	0.127371	AMPLIFICATION	3	0.00813008	DEEP DELETION	0	0	mRNA HIGH	16	0.043	mRNA LOW	0	0	FUSION	0	0	MISSENSE, INFRAME, TRUNCATING MUTATIONS (PUTATIVE DRIVER)	28	0.0758808
CDKN1B	ALL	27	0.0731707	AMPLIFICATION	3	0.00813008	DEEP DELETION	5	0.0135501	mRNA HIGH	15	0.041	mRNA LOW	0	0	FUSION	0	0	MISSENSE, INFRAME, TRUNCATING MUTATIONS (PUTATIVE DRIVER)	4	0.0108401
CHRNA7	ALL	14	0.0379404	AMPLIFICATION	0	0	DEEP DELETION	3	0.00813008	mRNA HIGH	11	0.03	mRNA LOW	0	0	FUSION	0	0	MISSENSE, INFRAME, TRUNCATING MUTATIONS (PUTATIVE DRIVER)	0	0
CHRNB2	ALL	22	0.0596206	AMPLIFICATION	17	0.0460705	DEEP DELETION	1	0.00271003	mRNA HIGH	4	0.011	mRNA LOW	0	0	FUSION	0	0	MISSENSE, INFRAME, TRUNCATING MUTATIONS (PUTATIVE DRIVER)	0	0
CIAO3	ALL	20	0.0542005	AMPLIFICATION	1	0.00271003	DEEP DELETION	6	0.0162602	mRNA HIGH	13	0.035	mRNA LOW	0	0	FUSION	0	0	MISSENSE, INFRAME, TRUNCATING MUTATIONS (PUTATIVE DRIVER)	0	0
CITED2	ALL	15	0.0406504	AMPLIFICATION	6	0.0162602	DEEP DELETION	1	0.00271003	mRNA HIGH	8	0.022	mRNA LOW	0	0	FUSION	0	0	MISSENSE, INFRAME, TRUNCATING MUTATIONS (PUTATIVE DRIVER)	0	0
CLDN3	ALL	17	0.0460705	AMPLIFICATION	3	0.00813008	DEEP DELETION	0	0	mRNA HIGH	14	0.038	mRNA LOW	0	0	FUSION	0	0	MISSENSE, INFRAME, TRUNCATING MUTATIONS (PUTATIVE DRIVER)	0	0
COPS5	ALL	95	0.257453	AMPLIFICATION	9	0.0243902	DEEP DELETION	0	0	mRNA HIGH	82	0.222	mRNA LOW	4	0.0108401	FUSION	0	0	MISSENSE, INFRAME, TRUNCATING MUTATIONS (PUTATIVE DRIVER)	0	0
CREBBP	ALL	65	0.176152	AMPLIFICATION	0	0	DEEP DELETION	12	0.0325203	mRNA HIGH	11	0.03	mRNA LOW	9	0.0243902	FUSION	3	0.00813008	MISSENSE, INFRAME, TRUNCATING MUTATIONS (PUTATIVE DRIVER)	30	0.0813008
CUL2	ALL	71	0.192412	AMPLIFICATION	4	0.0108401	DEEP DELETION	2	0.00542005	mRNA HIGH	54	0.146	mRNA LOW	11	0.0298103	FUSION	0	0	MISSENSE, INFRAME, TRUNCATING MUTATIONS (PUTATIVE DRIVER)	0	0
CXCR4	ALL	11	0.0298103	AMPLIFICATION	1	0.00271003	DEEP DELETION	1	0.00271003	mRNA HIGH	9	0.024	mRNA LOW	0	0	FUSION	0	0	MISSENSE, INFRAME, TRUNCATING MUTATIONS (PUTATIVE DRIVER)	0	0
CYBB	ALL	19	0.0514905	AMPLIFICATION	2	0.00542005	DEEP DELETION	2	0.00542005	mRNA HIGH	15	0.041	mRNA LOW	0	0	FUSION	0	0	MISSENSE, INFRAME, TRUNCATING MUTATIONS (PUTATIVE DRIVER)	0	0
CYP1A1	ALL	15	0.0406504	AMPLIFICATION	1	0.00271003	DEEP DELETION	0	0	mRNA HIGH	14	0.038	mRNA LOW	0	0	FUSION	0	0	MISSENSE, INFRAME, TRUNCATING MUTATIONS (PUTATIVE DRIVER)	0	0
DDIT4	ALL	23	0.0623306	AMPLIFICATION	4	0.0108401	DEEP DELETION	2	0.00542005	mRNA HIGH	17	0.046	mRNA LOW	0	0	FUSION	0	0	MISSENSE, INFRAME, TRUNCATING MUTATIONS (PUTATIVE DRIVER)	0	0
DPP4	ALL	17	0.0460705	AMPLIFICATION	3	0.00813008	DEEP DELETION	0	0	mRNA HIGH	14	0.038	mRNA LOW	0	0	FUSION	0	0	MISSENSE, INFRAME, TRUNCATING MUTATIONS (PUTATIVE DRIVER)	0	0
E2F1	ALL	70	0.189702	AMPLIFICATION	17	0.0460705	DEEP DELETION	0	0	mRNA HIGH	53	0.144	mRNA LOW	0	0	FUSION	0	0	MISSENSE, INFRAME, TRUNCATING MUTATIONS (PUTATIVE DRIVER)	0	0
EDN1	ALL	44	0.119241	AMPLIFICATION	15	0.0406504	DEEP DELETION	1	0.00271003	mRNA HIGH	28	0.076	mRNA LOW	0	0	FUSION	0	0	MISSENSE, INFRAME, TRUNCATING MUTATIONS (PUTATIVE DRIVER)	0	0
EDNRA	ALL	28	0.0758808	AMPLIFICATION	6	0.0162602	DEEP DELETION	1	0.00271003	mRNA HIGH	21	0.057	mRNA LOW	0	0	FUSION	0	0	MISSENSE, INFRAME, TRUNCATING MUTATIONS (PUTATIVE DRIVER)	0	0
EDNRB	ALL	22	0.0596206	AMPLIFICATION	7	0.0189702	DEEP DELETION	5	0.0135501	mRNA HIGH	10	0.027	mRNA LOW	0	0	FUSION	0	0	MISSENSE, INFRAME, TRUNCATING MUTATIONS (PUTATIVE DRIVER)	0	0
EGF	ALL	19	0.0514905	AMPLIFICATION	3	0.00813008	DEEP DELETION	0	0	mRNA HIGH	16	0.043	mRNA LOW	0	0	FUSION	0	0	MISSENSE, INFRAME, TRUNCATING MUTATIONS (PUTATIVE DRIVER)	0	0
EGFR	ALL	76	0.205962	AMPLIFICATION	19	0.0514905	DEEP DELETION	0	0	mRNA HIGH	53	0.144	mRNA LOW	0	0	FUSION	3	0.00813008	MISSENSE, INFRAME, TRUNCATING MUTATIONS (PUTATIVE DRIVER)	1	0.00271003
EGLN1	ALL	24	0.0650407	AMPLIFICATION	5	0.0135501	DEEP DELETION	0	0	mRNA HIGH	18	0.049	mRNA LOW	1	0.00271003	FUSION	0	0	MISSENSE, INFRAME, TRUNCATING MUTATIONS (PUTATIVE DRIVER)	0	0
EGLN2	ALL	33	0.0894309	AMPLIFICATION	6	0.0162602	DEEP DELETION	0	0	mRNA HIGH	27	0.073	mRNA LOW	0	0	FUSION	0	0	MISSENSE, INFRAME, TRUNCATING MUTATIONS (PUTATIVE DRIVER)	0	0
EGLN3	ALL	20	0.0542005	AMPLIFICATION	1	0.00271003	DEEP DELETION	3	0.00813008	mRNA HIGH	16	0.043	mRNA LOW	0	0	FUSION	0	0	MISSENSE, INFRAME, TRUNCATING MUTATIONS (PUTATIVE DRIVER)	0	0
EIF4E	ALL	17	0.0460705	AMPLIFICATION	2	0.00542005	DEEP DELETION	1	0.00271003	mRNA HIGH	14	0.038	mRNA LOW	0	0	FUSION	0	0	MISSENSE, INFRAME, TRUNCATING MUTATIONS (PUTATIVE DRIVER)	0	0
EIF4E1B	ALL	28	0.0758808	AMPLIFICATION	2	0.00542005	DEEP DELETION	3	0.00813008	mRNA HIGH	23	0.062	mRNA LOW	0	0	FUSION	0	0	MISSENSE, INFRAME, TRUNCATING MUTATIONS (PUTATIVE DRIVER)	0	0
EIF4E2	ALL	21	0.0569106	AMPLIFICATION	0	0	DEEP DELETION	10	0.0271003	mRNA HIGH	7	0.019	mRNA LOW	4	0.0108401	FUSION	0	0	MISSENSE, INFRAME, TRUNCATING MUTATIONS (PUTATIVE DRIVER)	0	0
EIF4EBP1	ALL	72	0.195122	AMPLIFICATION	33	0.0894309	DEEP DELETION	8	0.0216802	mRNA HIGH	31	0.084	mRNA LOW	0	0	FUSION	0	0	MISSENSE, INFRAME, TRUNCATING MUTATIONS (PUTATIVE DRIVER)	0	0
ELF2	ALL	30	0.0813008	AMPLIFICATION	3	0.00813008	DEEP DELETION	1	0.00271003	mRNA HIGH	16	0.043	mRNA LOW	10	0.0271003	FUSION	0	0	MISSENSE, INFRAME, TRUNCATING MUTATIONS (PUTATIVE DRIVER)	0	0
ELOB	ALL	16	0.0433604	AMPLIFICATION	0	0	DEEP DELETION	5	0.0135501	mRNA HIGH	11	0.03	mRNA LOW	0	0	FUSION	0	0	MISSENSE, INFRAME, TRUNCATING MUTATIONS (PUTATIVE DRIVER)	0	0
ELOC	ALL	86	0.233062	AMPLIFICATION	12	0.0325203	DEEP DELETION	0	0	mRNA HIGH	72	0.195	mRNA LOW	1	0.00271003	FUSION	1	0.00271003	MISSENSE, INFRAME, TRUNCATING MUTATIONS (PUTATIVE DRIVER)	0	0
ENG	ALL	15	0.0406504	AMPLIFICATION	1	0.00271003	DEEP DELETION	1	0.00271003	mRNA HIGH	13	0.035	mRNA LOW	0	0	FUSION	0	0	MISSENSE, INFRAME, TRUNCATING MUTATIONS (PUTATIVE DRIVER)	0	0
ENO1	ALL	14	0.0379404	AMPLIFICATION	1	0.00271003	DEEP DELETION	0	0	mRNA HIGH	13	0.035	mRNA LOW	0	0	FUSION	0	0	MISSENSE, INFRAME, TRUNCATING MUTATIONS (PUTATIVE DRIVER)	0	0
ENO2	ALL	18	0.0487805	AMPLIFICATION	7	0.0189702	DEEP DELETION	2	0.00542005	mRNA HIGH	9	0.024	mRNA LOW	0	0	FUSION	0	0	MISSENSE, INFRAME, TRUNCATING MUTATIONS (PUTATIVE DRIVER)	0	0
ENO3	ALL	9	0.0243902	AMPLIFICATION	2	0.00542005	DEEP DELETION	4	0.0108401	mRNA HIGH	3	0.008	mRNA LOW	0	0	FUSION	0	0	MISSENSE, INFRAME, TRUNCATING MUTATIONS (PUTATIVE DRIVER)	0	0
ENO4	ALL	5	0.0135501	AMPLIFICATION	0	0	DEEP DELETION	5	0.0135501	mRNA HIGH	0	0	mRNA LOW	0	0	FUSION	0	0	MISSENSE, INFRAME, TRUNCATING MUTATIONS (PUTATIVE DRIVER)	0	0
EP300	ALL	51	0.138211	AMPLIFICATION	0	0	DEEP DELETION	4	0.0108401	mRNA HIGH	7	0.019	mRNA LOW	7	0.0189702	FUSION	2	0.00542005	MISSENSE, INFRAME, TRUNCATING MUTATIONS (PUTATIVE DRIVER)	31	0.0840108
EPAS1	ALL	32	0.0867209	AMPLIFICATION	8	0.0216802	DEEP DELETION	0	0	mRNA HIGH	24	0.065	mRNA LOW	0	0	FUSION	0	0	MISSENSE, INFRAME, TRUNCATING MUTATIONS (PUTATIVE DRIVER)	0	0
EPO	ALL	20	0.0542005	AMPLIFICATION	6	0.0162602	DEEP DELETION	0	0	mRNA HIGH	14	0.038	mRNA LOW	0	0	FUSION	0	0	MISSENSE, INFRAME, TRUNCATING MUTATIONS (PUTATIVE DRIVER)	0	0
ERBB2	ALL	101	0.273713	AMPLIFICATION	20	0.0542005	DEEP DELETION	0	0	mRNA HIGH	41	0.111	mRNA LOW	0	0	FUSION	5	0.0135501	MISSENSE, INFRAME, TRUNCATING MUTATIONS (PUTATIVE DRIVER)	35	0.0948509
ETS1	ALL	14	0.0379404	AMPLIFICATION	0	0	DEEP DELETION	3	0.00813008	mRNA HIGH	11	0.03	mRNA LOW	0	0	FUSION	0	0	MISSENSE, INFRAME, TRUNCATING MUTATIONS (PUTATIVE DRIVER)	0	0
FLT1	ALL	15	0.0406504	AMPLIFICATION	4	0.0108401	DEEP DELETION	0	0	mRNA HIGH	11	0.03	mRNA LOW	0	0	FUSION	0	0	MISSENSE, INFRAME, TRUNCATING MUTATIONS (PUTATIVE DRIVER)	0	0
GAPDH	ALL	32	0.0867209	AMPLIFICATION	7	0.0189702	DEEP DELETION	2	0.00542005	mRNA HIGH	22	0.06	mRNA LOW	0	0	FUSION	1	0.00271003	MISSENSE, INFRAME, TRUNCATING MUTATIONS (PUTATIVE DRIVER)	0	0
GATA6	ALL	22	0.0596206	AMPLIFICATION	7	0.0189702	DEEP DELETION	0	0	mRNA HIGH	15	0.041	mRNA LOW	0	0	FUSION	0	0	MISSENSE, INFRAME, TRUNCATING MUTATIONS (PUTATIVE DRIVER)	0	0
HBB	ALL	7	0.0189702	AMPLIFICATION	0	0	DEEP DELETION	0	0	mRNA HIGH	7	0.019	mRNA LOW	0	0	FUSION	0	0	MISSENSE, INFRAME, TRUNCATING MUTATIONS (PUTATIVE DRIVER)	0	0
HBG2	ALL	7	0.0189702	AMPLIFICATION	0	0	DEEP DELETION	0	0	mRNA HIGH	7	0.019	mRNA LOW	0	0	FUSION	0	0	MISSENSE, INFRAME, TRUNCATING MUTATIONS (PUTATIVE DRIVER)	0	0
HIF1A	ALL	6	0.0162602	AMPLIFICATION	1	0.00271003	DEEP DELETION	0	0	mRNA HIGH	5	0.014	mRNA LOW	0	0	FUSION	0	0	MISSENSE, INFRAME, TRUNCATING MUTATIONS (PUTATIVE DRIVER)	0	0
HIF3A	ALL	16	0.0433604	AMPLIFICATION	3	0.00813008	DEEP DELETION	0	0	mRNA HIGH	13	0.035	mRNA LOW	0	0	FUSION	0	0	MISSENSE, INFRAME, TRUNCATING MUTATIONS (PUTATIVE DRIVER)	0	0
HK1	ALL	29	0.0785908	AMPLIFICATION	3	0.00813008	DEEP DELETION	3	0.00813008	mRNA HIGH	14	0.038	mRNA LOW	8	0.0216802	FUSION	1	0.00271003	MISSENSE, INFRAME, TRUNCATING MUTATIONS (PUTATIVE DRIVER)	0	0
HK2	ALL	18	0.0487805	AMPLIFICATION	5	0.0135501	DEEP DELETION	0	0	mRNA HIGH	13	0.035	mRNA LOW	0	0	FUSION	0	0	MISSENSE, INFRAME, TRUNCATING MUTATIONS (PUTATIVE DRIVER)	0	0
HK3	ALL	15	0.0406504	AMPLIFICATION	2	0.00542005	DEEP DELETION	3	0.00813008	mRNA HIGH	10	0.027	mRNA LOW	0	0	FUSION	0	0	MISSENSE, INFRAME, TRUNCATING MUTATIONS (PUTATIVE DRIVER)	0	0
HKDC1	ALL	18	0.0487805	AMPLIFICATION	3	0.00813008	DEEP DELETION	3	0.00813008	mRNA HIGH	11	0.03	mRNA LOW	0	0	FUSION	1	0.00271003	MISSENSE, INFRAME, TRUNCATING MUTATIONS (PUTATIVE DRIVER)	0	0
HMBS	ALL	26	0.0704607	AMPLIFICATION	1	0.00271003	DEEP DELETION	1	0.00271003	mRNA HIGH	24	0.065	mRNA LOW	0	0	FUSION	0	0	MISSENSE, INFRAME, TRUNCATING MUTATIONS (PUTATIVE DRIVER)	0	0
HMOX1	ALL	20	0.0542005	AMPLIFICATION	6	0.0162602	DEEP DELETION	3	0.00813008	mRNA HIGH	11	0.03	mRNA LOW	0	0	FUSION	0	0	MISSENSE, INFRAME, TRUNCATING MUTATIONS (PUTATIVE DRIVER)	0	0
HMOX2	ALL	25	0.0677507	AMPLIFICATION	0	0	DEEP DELETION	7	0.0189702	mRNA HIGH	16	0.043	mRNA LOW	2	0.00542005	FUSION	0	0	MISSENSE, INFRAME, TRUNCATING MUTATIONS (PUTATIVE DRIVER)	0	0
HSP90B1	ALL	18	0.0487805	AMPLIFICATION	3	0.00813008	DEEP DELETION	0	0	mRNA HIGH	15	0.041	mRNA LOW	0	0	FUSION	0	0	MISSENSE, INFRAME, TRUNCATING MUTATIONS (PUTATIVE DRIVER)	0	0
HYOU1	ALL	25	0.0677507	AMPLIFICATION	1	0.00271003	DEEP DELETION	1	0.00271003	mRNA HIGH	21	0.057	mRNA LOW	2	0.00542005	FUSION	0	0	MISSENSE, INFRAME, TRUNCATING MUTATIONS (PUTATIVE DRIVER)	0	0
IFNG	ALL	31	0.0840108	AMPLIFICATION	19	0.0514905	DEEP DELETION	0	0	mRNA HIGH	12	0.033	mRNA LOW	0	0	FUSION	0	0	MISSENSE, INFRAME, TRUNCATING MUTATIONS (PUTATIVE DRIVER)	0	0
IFNGR1	ALL	17	0.0460705	AMPLIFICATION	3	0.00813008	DEEP DELETION	3	0.00813008	mRNA HIGH	11	0.03	mRNA LOW	0	0	FUSION	0	0	MISSENSE, INFRAME, TRUNCATING MUTATIONS (PUTATIVE DRIVER)	0	0
IFNGR2	ALL	41	0.111111	AMPLIFICATION	3	0.00813008	DEEP DELETION	0	0	mRNA HIGH	34	0.092	mRNA LOW	3	0.00813008	FUSION	1	0.00271003	MISSENSE, INFRAME, TRUNCATING MUTATIONS (PUTATIVE DRIVER)	0	0
IGF1	ALL	16	0.0433604	AMPLIFICATION	5	0.0135501	DEEP DELETION	0	0	mRNA HIGH	11	0.03	mRNA LOW	0	0	FUSION	0	0	MISSENSE, INFRAME, TRUNCATING MUTATIONS (PUTATIVE DRIVER)	0	0
IGF1R	ALL	15	0.0406504	AMPLIFICATION	1	0.00271003	DEEP DELETION	1	0.00271003	mRNA HIGH	13	0.035	mRNA LOW	0	0	FUSION	0	0	MISSENSE, INFRAME, TRUNCATING MUTATIONS (PUTATIVE DRIVER)	0	0
IGFBP1	ALL	16	0.0433604	AMPLIFICATION	3	0.00813008	DEEP DELETION	0	0	mRNA HIGH	13	0.035	mRNA LOW	0	0	FUSION	0	0	MISSENSE, INFRAME, TRUNCATING MUTATIONS (PUTATIVE DRIVER)	0	0
IGFBP2	ALL	16	0.0433604	AMPLIFICATION	0	0	DEEP DELETION	5	0.0135501	mRNA HIGH	11	0.03	mRNA LOW	0	0	FUSION	0	0	MISSENSE, INFRAME, TRUNCATING MUTATIONS (PUTATIVE DRIVER)	0	0
IL1A	ALL	27	0.0731707	AMPLIFICATION	4	0.0108401	DEEP DELETION	1	0.00271003	mRNA HIGH	22	0.06	mRNA LOW	0	0	FUSION	0	0	MISSENSE, INFRAME, TRUNCATING MUTATIONS (PUTATIVE DRIVER)	0	0
IL1B	ALL	29	0.0785908	AMPLIFICATION	4	0.0108401	DEEP DELETION	1	0.00271003	mRNA HIGH	24	0.065	mRNA LOW	0	0	FUSION	0	0	MISSENSE, INFRAME, TRUNCATING MUTATIONS (PUTATIVE DRIVER)	0	0
IL6	ALL	18	0.0487805	AMPLIFICATION	9	0.0243902	DEEP DELETION	2	0.00542005	mRNA HIGH	7	0.019	mRNA LOW	0	0	FUSION	0	0	MISSENSE, INFRAME, TRUNCATING MUTATIONS (PUTATIVE DRIVER)	0	0
IL6R	ALL	33	0.0894309	AMPLIFICATION	17	0.0460705	DEEP DELETION	1	0.00271003	mRNA HIGH	15	0.041	mRNA LOW	0	0	FUSION	0	0	MISSENSE, INFRAME, TRUNCATING MUTATIONS (PUTATIVE DRIVER)	0	0
INS	ALL	6	0.0162602	AMPLIFICATION	0	0	DEEP DELETION	0	0	mRNA HIGH	6	0.016	mRNA LOW	0	0	FUSION	0	0	MISSENSE, INFRAME, TRUNCATING MUTATIONS (PUTATIVE DRIVER)	0	0
INSR	ALL	15	0.0406504	AMPLIFICATION	2	0.00542005	DEEP DELETION	0	0	mRNA HIGH	13	0.035	mRNA LOW	0	0	FUSION	0	0	MISSENSE, INFRAME, TRUNCATING MUTATIONS (PUTATIVE DRIVER)	0	0
ITPR1	ALL	43	0.116531	AMPLIFICATION	17	0.0460705	DEEP DELETION	2	0.00542005	mRNA HIGH	24	0.065	mRNA LOW	0	0	FUSION	0	0	MISSENSE, INFRAME, TRUNCATING MUTATIONS (PUTATIVE DRIVER)	0	0
ITPR2	ALL	30	0.0813008	AMPLIFICATION	12	0.0325203	DEEP DELETION	2	0.00542005	mRNA HIGH	16	0.043	mRNA LOW	0	0	FUSION	0	0	MISSENSE, INFRAME, TRUNCATING MUTATIONS (PUTATIVE DRIVER)	0	0
KCNK3	ALL	15	0.0406504	AMPLIFICATION	5	0.0135501	DEEP DELETION	2	0.00542005	mRNA HIGH	8	0.022	mRNA LOW	0	0	FUSION	0	0	MISSENSE, INFRAME, TRUNCATING MUTATIONS (PUTATIVE DRIVER)	0	0
KCNMA1	ALL	18	0.0487805	AMPLIFICATION	6	0.0162602	DEEP DELETION	1	0.00271003	mRNA HIGH	11	0.03	mRNA LOW	0	0	FUSION	0	0	MISSENSE, INFRAME, TRUNCATING MUTATIONS (PUTATIVE DRIVER)	0	0
LDHA	ALL	11	0.0298103	AMPLIFICATION	2	0.00542005	DEEP DELETION	0	0	mRNA HIGH	9	0.024	mRNA LOW	0	0	FUSION	0	0	MISSENSE, INFRAME, TRUNCATING MUTATIONS (PUTATIVE DRIVER)	0	0
LDHAL6A	ALL	17	0.0460705	AMPLIFICATION	2	0.00542005	DEEP DELETION	0	0	mRNA HIGH	15	0.041	mRNA LOW	0	0	FUSION	0	0	MISSENSE, INFRAME, TRUNCATING MUTATIONS (PUTATIVE DRIVER)	0	0
LDHAL6B	ALL	22	0.0596206	AMPLIFICATION	1	0.00271003	DEEP DELETION	2	0.00542005	mRNA HIGH	19	0.051	mRNA LOW	0	0	FUSION	0	0	MISSENSE, INFRAME, TRUNCATING MUTATIONS (PUTATIVE DRIVER)	0	0
LDHB	ALL	31	0.0840108	AMPLIFICATION	7	0.0189702	DEEP DELETION	1	0.00271003	mRNA HIGH	23	0.062	mRNA LOW	0	0	FUSION	0	0	MISSENSE, INFRAME, TRUNCATING MUTATIONS (PUTATIVE DRIVER)	0	0
LDHC	ALL	25	0.0677507	AMPLIFICATION	2	0.00542005	DEEP DELETION	0	0	mRNA HIGH	22	0.06	mRNA LOW	0	0	FUSION	1	0.00271003	MISSENSE, INFRAME, TRUNCATING MUTATIONS (PUTATIVE DRIVER)	0	0
LMNA	ALL	39	0.105691	AMPLIFICATION	20	0.0542005	DEEP DELETION	1	0.00271003	mRNA HIGH	18	0.049	mRNA LOW	0	0	FUSION	0	0	MISSENSE, INFRAME, TRUNCATING MUTATIONS (PUTATIVE DRIVER)	0	0
LTBR	ALL	44	0.119241	AMPLIFICATION	6	0.0162602	DEEP DELETION	2	0.00542005	mRNA HIGH	33	0.089	mRNA LOW	3	0.00813008	FUSION	0	0	MISSENSE, INFRAME, TRUNCATING MUTATIONS (PUTATIVE DRIVER)	0	0
MAP2K1	ALL	18	0.0487805	AMPLIFICATION	1	0.00271003	DEEP DELETION	0	0	mRNA HIGH	15	0.041	mRNA LOW	2	0.00542005	FUSION	0	0	MISSENSE, INFRAME, TRUNCATING MUTATIONS (PUTATIVE DRIVER)	0	0
MAP2K2	ALL	16	0.0433604	AMPLIFICATION	1	0.00271003	DEEP DELETION	1	0.00271003	mRNA HIGH	13	0.035	mRNA LOW	0	0	FUSION	0	0	MISSENSE, INFRAME, TRUNCATING MUTATIONS (PUTATIVE DRIVER)	1	0.00271003
MAPK1	ALL	42	0.113821	AMPLIFICATION	9	0.0243902	DEEP DELETION	2	0.00542005	mRNA HIGH	22	0.06	mRNA LOW	8	0.0216802	FUSION	0	0	MISSENSE, INFRAME, TRUNCATING MUTATIONS (PUTATIVE DRIVER)	1	0.00271003
MAPK3	ALL	34	0.0921409	AMPLIFICATION	10	0.0271003	DEEP DELETION	0	0	mRNA HIGH	23	0.062	mRNA LOW	0	0	FUSION	1	0.00271003	MISSENSE, INFRAME, TRUNCATING MUTATIONS (PUTATIVE DRIVER)	0	0
MDM2	ALL	74	0.200542	AMPLIFICATION	32	0.0867209	DEEP DELETION	0	0	mRNA HIGH	42	0.114	mRNA LOW	0	0	FUSION	0	0	MISSENSE, INFRAME, TRUNCATING MUTATIONS (PUTATIVE DRIVER)	0	0
MDM4	ALL	23	0.0623306	AMPLIFICATION	2	0.00542005	DEEP DELETION	0	0	mRNA HIGH	21	0.057	mRNA LOW	0	0	FUSION	0	0	MISSENSE, INFRAME, TRUNCATING MUTATIONS (PUTATIVE DRIVER)	0	0
MKNK1	ALL	25	0.0677507	AMPLIFICATION	9	0.0243902	DEEP DELETION	0	0	mRNA HIGH	15	0.041	mRNA LOW	1	0.00271003	FUSION	0	0	MISSENSE, INFRAME, TRUNCATING MUTATIONS (PUTATIVE DRIVER)	0	0
MKNK2	ALL	12	0.0325203	AMPLIFICATION	3	0.00813008	DEEP DELETION	0	0	mRNA HIGH	9	0.024	mRNA LOW	0	0	FUSION	0	0	MISSENSE, INFRAME, TRUNCATING MUTATIONS (PUTATIVE DRIVER)	0	0
MMP14	ALL	36	0.097561	AMPLIFICATION	7	0.0189702	DEEP DELETION	3	0.00813008	mRNA HIGH	25	0.068	mRNA LOW	0	0	FUSION	1	0.00271003	MISSENSE, INFRAME, TRUNCATING MUTATIONS (PUTATIVE DRIVER)	0	0
MMP2	ALL	15	0.0406504	AMPLIFICATION	1	0.00271003	DEEP DELETION	4	0.0108401	mRNA HIGH	10	0.027	mRNA LOW	0	0	FUSION	0	0	MISSENSE, INFRAME, TRUNCATING MUTATIONS (PUTATIVE DRIVER)	0	0
MMP3	ALL	23	0.0623306	AMPLIFICATION	11	0.0298103	DEEP DELETION	1	0.00271003	mRNA HIGH	11	0.03	mRNA LOW	0	0	FUSION	0	0	MISSENSE, INFRAME, TRUNCATING MUTATIONS (PUTATIVE DRIVER)	0	0
MT3	ALL	10	0.0271003	AMPLIFICATION	1	0.00271003	DEEP DELETION	2	0.00542005	mRNA HIGH	7	0.019	mRNA LOW	0	0	FUSION	0	0	MISSENSE, INFRAME, TRUNCATING MUTATIONS (PUTATIVE DRIVER)	0	0
MTOR	ALL	31	0.0840108	AMPLIFICATION	2	0.00542005	DEEP DELETION	0	0	mRNA HIGH	26	0.07	mRNA LOW	2	0.00542005	FUSION	0	0	MISSENSE, INFRAME, TRUNCATING MUTATIONS (PUTATIVE DRIVER)	1	0.00271003
NDRG1	ALL	49	0.132791	AMPLIFICATION	17	0.0460705	DEEP DELETION	0	0	mRNA HIGH	32	0.087	mRNA LOW	0	0	FUSION	0	0	MISSENSE, INFRAME, TRUNCATING MUTATIONS (PUTATIVE DRIVER)	0	0
NFKB1	ALL	14	0.0379404	AMPLIFICATION	1	0.00271003	DEEP DELETION	0	0	mRNA HIGH	11	0.03	mRNA LOW	2	0.00542005	FUSION	0	0	MISSENSE, INFRAME, TRUNCATING MUTATIONS (PUTATIVE DRIVER)	0	0
NOS1	ALL	10	0.0271003	AMPLIFICATION	6	0.0162602	DEEP DELETION	0	0	mRNA HIGH	4	0.011	mRNA LOW	0	0	FUSION	0	0	MISSENSE, INFRAME, TRUNCATING MUTATIONS (PUTATIVE DRIVER)	0	0
NOS2	ALL	15	0.0406504	AMPLIFICATION	12	0.0325203	DEEP DELETION	0	0	mRNA HIGH	3	0.008	mRNA LOW	0	0	FUSION	0	0	MISSENSE, INFRAME, TRUNCATING MUTATIONS (PUTATIVE DRIVER)	0	0
NOS3	ALL	7	0.0189702	AMPLIFICATION	2	0.00542005	DEEP DELETION	2	0.00542005	mRNA HIGH	3	0.008	mRNA LOW	0	0	FUSION	0	0	MISSENSE, INFRAME, TRUNCATING MUTATIONS (PUTATIVE DRIVER)	0	0
NOTCH1	ALL	27	0.0731707	AMPLIFICATION	4	0.0108401	DEEP DELETION	4	0.0108401	mRNA HIGH	18	0.049	mRNA LOW	0	0	FUSION	0	0	MISSENSE, INFRAME, TRUNCATING MUTATIONS (PUTATIVE DRIVER)	1	0.00271003
NPEPPS	ALL	35	0.0948509	AMPLIFICATION	5	0.0135501	DEEP DELETION	0	0	mRNA HIGH	29	0.079	mRNA LOW	0	0	FUSION	1	0.00271003	MISSENSE, INFRAME, TRUNCATING MUTATIONS (PUTATIVE DRIVER)	0	0
NPPA	ALL	19	0.0514905	AMPLIFICATION	3	0.00813008	DEEP DELETION	0	0	mRNA HIGH	16	0.043	mRNA LOW	0	0	FUSION	0	0	MISSENSE, INFRAME, TRUNCATING MUTATIONS (PUTATIVE DRIVER)	0	0
NPPB	ALL	20	0.0542005	AMPLIFICATION	3	0.00813008	DEEP DELETION	0	0	mRNA HIGH	17	0.046	mRNA LOW	0	0	FUSION	0	0	MISSENSE, INFRAME, TRUNCATING MUTATIONS (PUTATIVE DRIVER)	0	0
NR4A2	ALL	9	0.0243902	AMPLIFICATION	0	0	DEEP DELETION	0	0	mRNA HIGH	9	0.024	mRNA LOW	0	0	FUSION	0	0	MISSENSE, INFRAME, TRUNCATING MUTATIONS (PUTATIVE DRIVER)	0	0
NRP1	ALL	26	0.0704607	AMPLIFICATION	4	0.0108401	DEEP DELETION	2	0.00542005	mRNA HIGH	20	0.054	mRNA LOW	0	0	FUSION	0	0	MISSENSE, INFRAME, TRUNCATING MUTATIONS (PUTATIVE DRIVER)	0	0
NRP2	ALL	16	0.0433604	AMPLIFICATION	1	0.00271003	DEEP DELETION	3	0.00813008	mRNA HIGH	12	0.033	mRNA LOW	0	0	FUSION	0	0	MISSENSE, INFRAME, TRUNCATING MUTATIONS (PUTATIVE DRIVER)	0	0
OS9	ALL	29	0.0785908	AMPLIFICATION	5	0.0135501	DEEP DELETION	0	0	mRNA HIGH	22	0.06	mRNA LOW	1	0.00271003	FUSION	1	0.00271003	MISSENSE, INFRAME, TRUNCATING MUTATIONS (PUTATIVE DRIVER)	0	0
PAM	ALL	14	0.0379404	AMPLIFICATION	1	0.00271003	DEEP DELETION	2	0.00542005	mRNA HIGH	11	0.03	mRNA LOW	0	0	FUSION	0	0	MISSENSE, INFRAME, TRUNCATING MUTATIONS (PUTATIVE DRIVER)	0	0
PDE5A	ALL	7	0.0189702	AMPLIFICATION	2	0.00542005	DEEP DELETION	0	0	mRNA HIGH	5	0.014	mRNA LOW	0	0	FUSION	0	0	MISSENSE, INFRAME, TRUNCATING MUTATIONS (PUTATIVE DRIVER)	0	0
PDGFB	ALL	22	0.0596206	AMPLIFICATION	2	0.00542005	DEEP DELETION	4	0.0108401	mRNA HIGH	16	0.043	mRNA LOW	0	0	FUSION	0	0	MISSENSE, INFRAME, TRUNCATING MUTATIONS (PUTATIVE DRIVER)	0	0
PDHA1	ALL	22	0.0596206	AMPLIFICATION	4	0.0108401	DEEP DELETION	2	0.00542005	mRNA HIGH	16	0.043	mRNA LOW	0	0	FUSION	0	0	MISSENSE, INFRAME, TRUNCATING MUTATIONS (PUTATIVE DRIVER)	0	0
PDHA2	ALL	5	0.0135501	AMPLIFICATION	0	0	DEEP DELETION	2	0.00542005	mRNA HIGH	3	0.008	mRNA LOW	0	0	FUSION	0	0	MISSENSE, INFRAME, TRUNCATING MUTATIONS (PUTATIVE DRIVER)	0	0
PDHB	ALL	35	0.0948509	AMPLIFICATION	1	0.00271003	DEEP DELETION	4	0.0108401	mRNA HIGH	17	0.046	mRNA LOW	13	0.0352304	FUSION	0	0	MISSENSE, INFRAME, TRUNCATING MUTATIONS (PUTATIVE DRIVER)	0	0
PDIA2	ALL	14	0.0379404	AMPLIFICATION	1	0.00271003	DEEP DELETION	6	0.0162602	mRNA HIGH	7	0.019	mRNA LOW	0	0	FUSION	0	0	MISSENSE, INFRAME, TRUNCATING MUTATIONS (PUTATIVE DRIVER)	0	0
PDK1	ALL	17	0.0460705	AMPLIFICATION	3	0.00813008	DEEP DELETION	0	0	mRNA HIGH	14	0.038	mRNA LOW	0	0	FUSION	0	0	MISSENSE, INFRAME, TRUNCATING MUTATIONS (PUTATIVE DRIVER)	0	0
PFKFB3	ALL	45	0.121951	AMPLIFICATION	27	0.0731707	DEEP DELETION	1	0.00271003	mRNA HIGH	17	0.046	mRNA LOW	0	0	FUSION	0	0	MISSENSE, INFRAME, TRUNCATING MUTATIONS (PUTATIVE DRIVER)	0	0
PFKL	ALL	30	0.0813008	AMPLIFICATION	2	0.00542005	DEEP DELETION	2	0.00542005	mRNA HIGH	26	0.07	mRNA LOW	0	0	FUSION	0	0	MISSENSE, INFRAME, TRUNCATING MUTATIONS (PUTATIVE DRIVER)	0	0
PFKM	ALL	20	0.0542005	AMPLIFICATION	4	0.0108401	DEEP DELETION	0	0	mRNA HIGH	16	0.043	mRNA LOW	0	0	FUSION	0	0	MISSENSE, INFRAME, TRUNCATING MUTATIONS (PUTATIVE DRIVER)	0	0
PFKP	ALL	45	0.121951	AMPLIFICATION	20	0.0542005	DEEP DELETION	1	0.00271003	mRNA HIGH	23	0.062	mRNA LOW	0	0	FUSION	1	0.00271003	MISSENSE, INFRAME, TRUNCATING MUTATIONS (PUTATIVE DRIVER)	0	0
PGF	ALL	23	0.0623306	AMPLIFICATION	3	0.00813008	DEEP DELETION	1	0.00271003	mRNA HIGH	19	0.051	mRNA LOW	0	0	FUSION	0	0	MISSENSE, INFRAME, TRUNCATING MUTATIONS (PUTATIVE DRIVER)	0	0
PGK1	ALL	18	0.0487805	AMPLIFICATION	1	0.00271003	DEEP DELETION	2	0.00542005	mRNA HIGH	15	0.041	mRNA LOW	0	0	FUSION	0	0	MISSENSE, INFRAME, TRUNCATING MUTATIONS (PUTATIVE DRIVER)	0	0
PGK2	ALL	21	0.0569106	AMPLIFICATION	1	0.00271003	DEEP DELETION	0	0	mRNA HIGH	20	0.054	mRNA LOW	0	0	FUSION	0	0	MISSENSE, INFRAME, TRUNCATING MUTATIONS (PUTATIVE DRIVER)	0	0
PIK3CA	ALL	121	0.327913	AMPLIFICATION	13	0.0352304	DEEP DELETION	0	0	mRNA HIGH	35	0.095	mRNA LOW	3	0.00813008	FUSION	0	0	MISSENSE, INFRAME, TRUNCATING MUTATIONS (PUTATIVE DRIVER)	70	0.189702
PIK3CB	ALL	30	0.0813008	AMPLIFICATION	3	0.00813008	DEEP DELETION	1	0.00271003	mRNA HIGH	24	0.065	mRNA LOW	0	0	FUSION	0	0	MISSENSE, INFRAME, TRUNCATING MUTATIONS (PUTATIVE DRIVER)	2	0.00542005
PIK3CD	ALL	12	0.0325203	AMPLIFICATION	1	0.00271003	DEEP DELETION	0	0	mRNA HIGH	11	0.03	mRNA LOW	0	0	FUSION	0	0	MISSENSE, INFRAME, TRUNCATING MUTATIONS (PUTATIVE DRIVER)	0	0
PIK3CG	ALL	15	0.0406504	AMPLIFICATION	4	0.0108401	DEEP DELETION	1	0.00271003	mRNA HIGH	10	0.027	mRNA LOW	0	0	FUSION	0	0	MISSENSE, INFRAME, TRUNCATING MUTATIONS (PUTATIVE DRIVER)	0	0
PIK3R1	ALL	18	0.0487805	AMPLIFICATION	0	0	DEEP DELETION	5	0.0135501	mRNA HIGH	10	0.027	mRNA LOW	0	0	FUSION	0	0	MISSENSE, INFRAME, TRUNCATING MUTATIONS (PUTATIVE DRIVER)	3	0.00813008
PIK3R2	ALL	18	0.0487805	AMPLIFICATION	0	0	DEEP DELETION	0	0	mRNA HIGH	17	0.046	mRNA LOW	0	0	FUSION	0	0	MISSENSE, INFRAME, TRUNCATING MUTATIONS (PUTATIVE DRIVER)	1	0.00271003
PIK3R3	ALL	30	0.0813008	AMPLIFICATION	10	0.0271003	DEEP DELETION	0	0	mRNA HIGH	20	0.054	mRNA LOW	0	0	FUSION	0	0	MISSENSE, INFRAME, TRUNCATING MUTATIONS (PUTATIVE DRIVER)	0	0
PKLR	ALL	35	0.0948509	AMPLIFICATION	17	0.0460705	DEEP DELETION	1	0.00271003	mRNA HIGH	16	0.043	mRNA LOW	0	0	FUSION	1	0.00271003	MISSENSE, INFRAME, TRUNCATING MUTATIONS (PUTATIVE DRIVER)	0	0
PLCG1	ALL	51	0.138211	AMPLIFICATION	5	0.0135501	DEEP DELETION	0	0	mRNA HIGH	46	0.125	mRNA LOW	0	0	FUSION	0	0	MISSENSE, INFRAME, TRUNCATING MUTATIONS (PUTATIVE DRIVER)	0	0
PLCG2	ALL	7	0.0189702	AMPLIFICATION	5	0.0135501	DEEP DELETION	1	0.00271003	mRNA HIGH	1	0.003	mRNA LOW	0	0	FUSION	0	0	MISSENSE, INFRAME, TRUNCATING MUTATIONS (PUTATIVE DRIVER)	0	0
PLOD1	ALL	20	0.0542005	AMPLIFICATION	3	0.00813008	DEEP DELETION	0	0	mRNA HIGH	17	0.046	mRNA LOW	0	0	FUSION	0	0	MISSENSE, INFRAME, TRUNCATING MUTATIONS (PUTATIVE DRIVER)	0	0
PLOD2	ALL	28	0.0758808	AMPLIFICATION	7	0.0189702	DEEP DELETION	0	0	mRNA HIGH	21	0.057	mRNA LOW	0	0	FUSION	0	0	MISSENSE, INFRAME, TRUNCATING MUTATIONS (PUTATIVE DRIVER)	0	0
PMAIP1	ALL	23	0.0623306	AMPLIFICATION	0	0	DEEP DELETION	5	0.0135501	mRNA HIGH	18	0.049	mRNA LOW	0	0	FUSION	0	0	MISSENSE, INFRAME, TRUNCATING MUTATIONS (PUTATIVE DRIVER)	0	0
PML	ALL	16	0.0433604	AMPLIFICATION	1	0.00271003	DEEP DELETION	0	0	mRNA HIGH	15	0.041	mRNA LOW	0	0	FUSION	0	0	MISSENSE, INFRAME, TRUNCATING MUTATIONS (PUTATIVE DRIVER)	0	0
POLR2A	ALL	10	0.0271003	AMPLIFICATION	0	0	DEEP DELETION	4	0.0108401	mRNA HIGH	6	0.016	mRNA LOW	0	0	FUSION	0	0	MISSENSE, INFRAME, TRUNCATING MUTATIONS (PUTATIVE DRIVER)	0	0
PPARA	ALL	17	0.0460705	AMPLIFICATION	0	0	DEEP DELETION	6	0.0162602	mRNA HIGH	11	0.03	mRNA LOW	0	0	FUSION	0	0	MISSENSE, INFRAME, TRUNCATING MUTATIONS (PUTATIVE DRIVER)	0	0
PRKAA1	ALL	57	0.154472	AMPLIFICATION	21	0.0569106	DEEP DELETION	0	0	mRNA HIGH	36	0.098	mRNA LOW	0	0	FUSION	0	0	MISSENSE, INFRAME, TRUNCATING MUTATIONS (PUTATIVE DRIVER)	0	0
PRKAA2	ALL	27	0.0731707	AMPLIFICATION	8	0.0216802	DEEP DELETION	0	0	mRNA HIGH	19	0.051	mRNA LOW	0	0	FUSION	0	0	MISSENSE, INFRAME, TRUNCATING MUTATIONS (PUTATIVE DRIVER)	0	0
PRKCA	ALL	33	0.0894309	AMPLIFICATION	9	0.0243902	DEEP DELETION	1	0.00271003	mRNA HIGH	22	0.06	mRNA LOW	0	0	FUSION	1	0.00271003	MISSENSE, INFRAME, TRUNCATING MUTATIONS (PUTATIVE DRIVER)	0	0
PRKCB	ALL	18	0.0487805	AMPLIFICATION	10	0.0271003	DEEP DELETION	0	0	mRNA HIGH	7	0.019	mRNA LOW	0	0	FUSION	1	0.00271003	MISSENSE, INFRAME, TRUNCATING MUTATIONS (PUTATIVE DRIVER)	0	0
PRKCG	ALL	23	0.0623306	AMPLIFICATION	9	0.0243902	DEEP DELETION	0	0	mRNA HIGH	14	0.038	mRNA LOW	0	0	FUSION	0	0	MISSENSE, INFRAME, TRUNCATING MUTATIONS (PUTATIVE DRIVER)	0	0
PSEN2	ALL	19	0.0514905	AMPLIFICATION	1	0.00271003	DEEP DELETION	1	0.00271003	mRNA HIGH	17	0.046	mRNA LOW	0	0	FUSION	0	0	MISSENSE, INFRAME, TRUNCATING MUTATIONS (PUTATIVE DRIVER)	0	0
PSMC3	ALL	23	0.0623306	AMPLIFICATION	3	0.00813008	DEEP DELETION	1	0.00271003	mRNA HIGH	19	0.051	mRNA LOW	0	0	FUSION	0	0	MISSENSE, INFRAME, TRUNCATING MUTATIONS (PUTATIVE DRIVER)	0	0
RBX1	ALL	18	0.0487805	AMPLIFICATION	0	0	DEEP DELETION	2	0.00542005	mRNA HIGH	14	0.038	mRNA LOW	2	0.00542005	FUSION	0	0	MISSENSE, INFRAME, TRUNCATING MUTATIONS (PUTATIVE DRIVER)	0	0
RELA	ALL	55	0.149051	AMPLIFICATION	9	0.0243902	DEEP DELETION	0	0	mRNA HIGH	34	0.092	mRNA LOW	12	0.0325203	FUSION	0	0	MISSENSE, INFRAME, TRUNCATING MUTATIONS (PUTATIVE DRIVER)	0	0
RPS6	ALL	20	0.0542005	AMPLIFICATION	3	0.00813008	DEEP DELETION	3	0.00813008	mRNA HIGH	14	0.038	mRNA LOW	0	0	FUSION	0	0	MISSENSE, INFRAME, TRUNCATING MUTATIONS (PUTATIVE DRIVER)	0	0
RPS6KB1	ALL	61	0.165312	AMPLIFICATION	10	0.0271003	DEEP DELETION	0	0	mRNA HIGH	47	0.127	mRNA LOW	4	0.0108401	FUSION	0	0	MISSENSE, INFRAME, TRUNCATING MUTATIONS (PUTATIVE DRIVER)	0	0
RPS6KB2	ALL	40	0.108401	AMPLIFICATION	11	0.0298103	DEEP DELETION	0	0	mRNA HIGH	28	0.076	mRNA LOW	0	0	FUSION	1	0.00271003	MISSENSE, INFRAME, TRUNCATING MUTATIONS (PUTATIVE DRIVER)	0	0
RYR1	ALL	57	0.154472	AMPLIFICATION	19	0.0514905	DEEP DELETION	0	0	mRNA HIGH	38	0.103	mRNA LOW	0	0	FUSION	0	0	MISSENSE, INFRAME, TRUNCATING MUTATIONS (PUTATIVE DRIVER)	0	0
SATB1	ALL	50	0.135501	AMPLIFICATION	11	0.0298103	DEEP DELETION	2	0.00542005	mRNA HIGH	37	0.1	mRNA LOW	0	0	FUSION	0	0	MISSENSE, INFRAME, TRUNCATING MUTATIONS (PUTATIVE DRIVER)	0	0
SCNN1B	ALL	39	0.105691	AMPLIFICATION	9	0.0243902	DEEP DELETION	0	0	mRNA HIGH	30	0.081	mRNA LOW	0	0	FUSION	0	0	MISSENSE, INFRAME, TRUNCATING MUTATIONS (PUTATIVE DRIVER)	0	0
SERPINE1	ALL	18	0.0487805	AMPLIFICATION	7	0.0189702	DEEP DELETION	1	0.00271003	mRNA HIGH	10	0.027	mRNA LOW	0	0	FUSION	0	0	MISSENSE, INFRAME, TRUNCATING MUTATIONS (PUTATIVE DRIVER)	0	0
SFRP1	ALL	47	0.127371	AMPLIFICATION	21	0.0569106	DEEP DELETION	7	0.0189702	mRNA HIGH	19	0.051	mRNA LOW	0	0	FUSION	0	0	MISSENSE, INFRAME, TRUNCATING MUTATIONS (PUTATIVE DRIVER)	0	0
SHC1	ALL	41	0.111111	AMPLIFICATION	18	0.0487805	DEEP DELETION	1	0.00271003	mRNA HIGH	22	0.06	mRNA LOW	0	0	FUSION	0	0	MISSENSE, INFRAME, TRUNCATING MUTATIONS (PUTATIVE DRIVER)	0	0
SLC29A1	ALL	27	0.0731707	AMPLIFICATION	11	0.0298103	DEEP DELETION	0	0	mRNA HIGH	16	0.043	mRNA LOW	0	0	FUSION	0	0	MISSENSE, INFRAME, TRUNCATING MUTATIONS (PUTATIVE DRIVER)	0	0
SLC2A1	ALL	32	0.0867209	AMPLIFICATION	15	0.0406504	DEEP DELETION	0	0	mRNA HIGH	17	0.046	mRNA LOW	0	0	FUSION	0	0	MISSENSE, INFRAME, TRUNCATING MUTATIONS (PUTATIVE DRIVER)	0	0
SLC8A1	ALL	29	0.0785908	AMPLIFICATION	4	0.0108401	DEEP DELETION	0	0	mRNA HIGH	25	0.068	mRNA LOW	0	0	FUSION	0	0	MISSENSE, INFRAME, TRUNCATING MUTATIONS (PUTATIVE DRIVER)	0	0
SMAD3	ALL	23	0.0623306	AMPLIFICATION	0	0	DEEP DELETION	1	0.00271003	mRNA HIGH	20	0.054	mRNA LOW	0	0	FUSION	0	0	MISSENSE, INFRAME, TRUNCATING MUTATIONS (PUTATIVE DRIVER)	2	0.00542005
SMAD4	ALL	59	0.159892	AMPLIFICATION	0	0	DEEP DELETION	4	0.0108401	mRNA HIGH	18	0.049	mRNA LOW	35	0.0948509	FUSION	0	0	MISSENSE, INFRAME, TRUNCATING MUTATIONS (PUTATIVE DRIVER)	2	0.00542005
SNAI3	ALL	11	0.0298103	AMPLIFICATION	6	0.0162602	DEEP DELETION	1	0.00271003	mRNA HIGH	4	0.011	mRNA LOW	0	0	FUSION	0	0	MISSENSE, INFRAME, TRUNCATING MUTATIONS (PUTATIVE DRIVER)	0	0
SOD2	ALL	18	0.0487805	AMPLIFICATION	0	0	DEEP DELETION	2	0.00542005	mRNA HIGH	16	0.043	mRNA LOW	0	0	FUSION	0	0	MISSENSE, INFRAME, TRUNCATING MUTATIONS (PUTATIVE DRIVER)	0	0
SOD3	ALL	16	0.0433604	AMPLIFICATION	0	0	DEEP DELETION	2	0.00542005	mRNA HIGH	14	0.038	mRNA LOW	0	0	FUSION	0	0	MISSENSE, INFRAME, TRUNCATING MUTATIONS (PUTATIVE DRIVER)	0	0
SPRY2	ALL	19	0.0514905	AMPLIFICATION	6	0.0162602	DEEP DELETION	5	0.0135501	mRNA HIGH	8	0.022	mRNA LOW	0	0	FUSION	0	0	MISSENSE, INFRAME, TRUNCATING MUTATIONS (PUTATIVE DRIVER)	0	0
STAT3	ALL	21	0.0569106	AMPLIFICATION	3	0.00813008	DEEP DELETION	0	0	mRNA HIGH	18	0.049	mRNA LOW	0	0	FUSION	0	0	MISSENSE, INFRAME, TRUNCATING MUTATIONS (PUTATIVE DRIVER)	0	0
STAT5B	ALL	24	0.0650407	AMPLIFICATION	2	0.00542005	DEEP DELETION	0	0	mRNA HIGH	21	0.057	mRNA LOW	0	0	FUSION	1	0.00271003	MISSENSE, INFRAME, TRUNCATING MUTATIONS (PUTATIVE DRIVER)	0	0
STC1	ALL	35	0.0948509	AMPLIFICATION	0	0	DEEP DELETION	20	0.0542005	mRNA HIGH	15	0.041	mRNA LOW	0	0	FUSION	0	0	MISSENSE, INFRAME, TRUNCATING MUTATIONS (PUTATIVE DRIVER)	0	0
STC2	ALL	11	0.0298103	AMPLIFICATION	2	0.00542005	DEEP DELETION	2	0.00542005	mRNA HIGH	7	0.019	mRNA LOW	0	0	FUSION	0	0	MISSENSE, INFRAME, TRUNCATING MUTATIONS (PUTATIVE DRIVER)	0	0
TEK	ALL	26	0.0704607	AMPLIFICATION	3	0.00813008	DEEP DELETION	6	0.0162602	mRNA HIGH	16	0.043	mRNA LOW	0	0	FUSION	1	0.00271003	MISSENSE, INFRAME, TRUNCATING MUTATIONS (PUTATIVE DRIVER)	0	0
TF	ALL	5	0.0135501	AMPLIFICATION	2	0.00542005	DEEP DELETION	1	0.00271003	mRNA HIGH	2	0.005	mRNA LOW	0	0	FUSION	0	0	MISSENSE, INFRAME, TRUNCATING MUTATIONS (PUTATIVE DRIVER)	0	0
TFRC	ALL	59	0.159892	AMPLIFICATION	12	0.0325203	DEEP DELETION	1	0.00271003	mRNA HIGH	45	0.122	mRNA LOW	0	0	FUSION	1	0.00271003	MISSENSE, INFRAME, TRUNCATING MUTATIONS (PUTATIVE DRIVER)	0	0
TGFA	ALL	29	0.0785908	AMPLIFICATION	9	0.0243902	DEEP DELETION	0	0	mRNA HIGH	20	0.054	mRNA LOW	0	0	FUSION	0	0	MISSENSE, INFRAME, TRUNCATING MUTATIONS (PUTATIVE DRIVER)	0	0
TGFB1	ALL	13	0.0352304	AMPLIFICATION	3	0.00813008	DEEP DELETION	0	0	mRNA HIGH	9	0.024	mRNA LOW	0	0	FUSION	1	0.00271003	MISSENSE, INFRAME, TRUNCATING MUTATIONS (PUTATIVE DRIVER)	0	0
TGFB2	ALL	12	0.0325203	AMPLIFICATION	3	0.00813008	DEEP DELETION	2	0.00542005	mRNA HIGH	7	0.019	mRNA LOW	0	0	FUSION	0	0	MISSENSE, INFRAME, TRUNCATING MUTATIONS (PUTATIVE DRIVER)	0	0
TGFB3	ALL	30	0.0813008	AMPLIFICATION	3	0.00813008	DEEP DELETION	2	0.00542005	mRNA HIGH	25	0.068	mRNA LOW	0	0	FUSION	0	0	MISSENSE, INFRAME, TRUNCATING MUTATIONS (PUTATIVE DRIVER)	0	0
TGFBR1	ALL	27	0.0731707	AMPLIFICATION	1	0.00271003	DEEP DELETION	8	0.0216802	mRNA HIGH	14	0.038	mRNA LOW	0	0	FUSION	0	0	MISSENSE, INFRAME, TRUNCATING MUTATIONS (PUTATIVE DRIVER)	4	0.0108401
TH	ALL	9	0.0243902	AMPLIFICATION	0	0	DEEP DELETION	0	0	mRNA HIGH	9	0.024	mRNA LOW	0	0	FUSION	0	0	MISSENSE, INFRAME, TRUNCATING MUTATIONS (PUTATIVE DRIVER)	0	0
THBS1	ALL	13	0.0352304	AMPLIFICATION	1	0.00271003	DEEP DELETION	2	0.00542005	mRNA HIGH	10	0.027	mRNA LOW	0	0	FUSION	0	0	MISSENSE, INFRAME, TRUNCATING MUTATIONS (PUTATIVE DRIVER)	0	0
TIMP1	ALL	17	0.0460705	AMPLIFICATION	2	0.00542005	DEEP DELETION	3	0.00813008	mRNA HIGH	12	0.033	mRNA LOW	0	0	FUSION	0	0	MISSENSE, INFRAME, TRUNCATING MUTATIONS (PUTATIVE DRIVER)	0	0
TLR4	ALL	13	0.0352304	AMPLIFICATION	0	0	DEEP DELETION	2	0.00542005	mRNA HIGH	11	0.03	mRNA LOW	0	0	FUSION	0	0	MISSENSE, INFRAME, TRUNCATING MUTATIONS (PUTATIVE DRIVER)	0	0
TNC	ALL	17	0.0460705	AMPLIFICATION	1	0.00271003	DEEP DELETION	2	0.00542005	mRNA HIGH	14	0.038	mRNA LOW	0	0	FUSION	0	0	MISSENSE, INFRAME, TRUNCATING MUTATIONS (PUTATIVE DRIVER)	0	0
TNF	ALL	15	0.0406504	AMPLIFICATION	5	0.0135501	DEEP DELETION	2	0.00542005	mRNA HIGH	8	0.022	mRNA LOW	0	0	FUSION	0	0	MISSENSE, INFRAME, TRUNCATING MUTATIONS (PUTATIVE DRIVER)	0	0
TP53	ALL	197	0.533875	AMPLIFICATION	0	0	DEEP DELETION	6	0.0162602	mRNA HIGH	9	0.024	mRNA LOW	5	0.0135501	FUSION	1	0.00271003	MISSENSE, INFRAME, TRUNCATING MUTATIONS (PUTATIVE DRIVER)	176	0.476965
TSC2	ALL	26	0.0704607	AMPLIFICATION	1	0.00271003	DEEP DELETION	5	0.0135501	mRNA HIGH	6	0.016	mRNA LOW	12	0.0325203	FUSION	0	0	MISSENSE, INFRAME, TRUNCATING MUTATIONS (PUTATIVE DRIVER)	2	0.00542005
UBE2B	ALL	28	0.0758808	AMPLIFICATION	0	0	DEEP DELETION	1	0.00271003	mRNA HIGH	12	0.033	mRNA LOW	15	0.0406504	FUSION	0	0	MISSENSE, INFRAME, TRUNCATING MUTATIONS (PUTATIVE DRIVER)	0	0
UCP2	ALL	25	0.0677507	AMPLIFICATION	9	0.0243902	DEEP DELETION	0	0	mRNA HIGH	16	0.043	mRNA LOW	0	0	FUSION	0	0	MISSENSE, INFRAME, TRUNCATING MUTATIONS (PUTATIVE DRIVER)	0	0
USF1	ALL	130	0.352304	AMPLIFICATION	67	0.181572	DEEP DELETION	0	0	mRNA HIGH	63	0.171	mRNA LOW	0	0	FUSION	0	0	MISSENSE, INFRAME, TRUNCATING MUTATIONS (PUTATIVE DRIVER)	0	0
VCAM1	ALL	14	0.0379404	AMPLIFICATION	1	0.00271003	DEEP DELETION	0	0	mRNA HIGH	13	0.035	mRNA LOW	0	0	FUSION	0	0	MISSENSE, INFRAME, TRUNCATING MUTATIONS (PUTATIVE DRIVER)	0	0
VEGFA	ALL	26	0.0704607	AMPLIFICATION	11	0.0298103	DEEP DELETION	0	0	mRNA HIGH	14	0.038	mRNA LOW	0	0	FUSION	1	0.00271003	MISSENSE, INFRAME, TRUNCATING MUTATIONS (PUTATIVE DRIVER)	0	0
VEGFC	ALL	26	0.0704607	AMPLIFICATION	1	0.00271003	DEEP DELETION	10	0.0271003	mRNA HIGH	15	0.041	mRNA LOW	0	0	FUSION	0	0	MISSENSE, INFRAME, TRUNCATING MUTATIONS (PUTATIVE DRIVER)	0	0
VHL	ALL	79	0.214092	AMPLIFICATION	29	0.0785908	DEEP DELETION	0	0	mRNA HIGH	47	0.127	mRNA LOW	3	0.00813008	FUSION	0	0	MISSENSE, INFRAME, TRUNCATING MUTATIONS (PUTATIVE DRIVER)	0	0
VLDLR	ALL	23	0.0623306	AMPLIFICATION	9	0.0243902	DEEP DELETION	3	0.00813008	mRNA HIGH	11	0.03	mRNA LOW	0	0	FUSION	0	0	MISSENSE, INFRAME, TRUNCATING MUTATIONS (PUTATIVE DRIVER)	0	0

## Sheet: ST_4
Supplementary Table 4. Frequency of genetic alterations in the hypoxia-related genes of 217 individuals with cervical squamous cell carcinoma from the TCGA Pan-Cancer Atlas project (TCGA-CESC-PanCancer).
GENE	TYPE	TOTAL	FREQUENCY	TYPE	TOTAL	FREQUENCY	TYPE	TOTAL	FREQUENCY	TYPE	TOTAL	FREQUENCY	TYPE	TOTAL	FREQUENCY	TYPE	TOTAL	FREQUENCY	TYPE	TOTAL	FREQUENCY
ACTN4	ALL	41	0.18894	AMPLIFICATION	5	0.0230415	DEEP DELETION	0	0	mRNA HIGH	34	0.156682	mRNA LOW	2	0.00921659	FUSION	0	0	MISSENSE, INFRAME, TRUNCATING MUTATIONS (PUTATIVE DRIVER)	0	0
ADA	ALL	16	0.0737327	AMPLIFICATION	3	0.0138249	DEEP DELETION	0	0	mRNA HIGH	13	0.0599078	mRNA LOW	0	0	FUSION	0	0	MISSENSE, INFRAME, TRUNCATING MUTATIONS (PUTATIVE DRIVER)	0	0
ADAM8	ALL	24	0.110599	AMPLIFICATION	0	0	DEEP DELETION	4	0.0184332	mRNA HIGH	20	0.0921659	mRNA LOW	0	0	FUSION	0	0	MISSENSE, INFRAME, TRUNCATING MUTATIONS (PUTATIVE DRIVER)	0	0
ADM	ALL	5	0.0230415	AMPLIFICATION	0	0	DEEP DELETION	0	0	mRNA HIGH	5	0.0230415	mRNA LOW	0	0	FUSION	0	0	MISSENSE, INFRAME, TRUNCATING MUTATIONS (PUTATIVE DRIVER)	0	0
ADORA1	ALL	16	0.0737327	AMPLIFICATION	1	0.00460829	DEEP DELETION	0	0	mRNA HIGH	15	0.0691244	mRNA LOW	0	0	FUSION	0	0	MISSENSE, INFRAME, TRUNCATING MUTATIONS (PUTATIVE DRIVER)	0	0
ADRA1B	ALL	10	0.0460829	AMPLIFICATION	2	0.00921659	DEEP DELETION	1	0.00460829	mRNA HIGH	7	0.0322581	mRNA LOW	0	0	FUSION	0	0	MISSENSE, INFRAME, TRUNCATING MUTATIONS (PUTATIVE DRIVER)	0	0
AKT1	ALL	31	0.142857	AMPLIFICATION	3	0.0138249	DEEP DELETION	2	0.00921659	mRNA HIGH	17	0.078341	mRNA LOW	6	0.0276498	FUSION	0	0	MISSENSE, INFRAME, TRUNCATING MUTATIONS (PUTATIVE DRIVER)	3	0.0138249
AKT2	ALL	42	0.193548	AMPLIFICATION	4	0.0184332	DEEP DELETION	0	0	mRNA HIGH	31	0.142857	mRNA LOW	6	0.0276498	FUSION	1	0.00460829	MISSENSE, INFRAME, TRUNCATING MUTATIONS (PUTATIVE DRIVER)	0	0
AKT3	ALL	15	0.0691244	AMPLIFICATION	1	0.00460829	DEEP DELETION	0	0	mRNA HIGH	14	0.0645161	mRNA LOW	0	0	FUSION	0	0	MISSENSE, INFRAME, TRUNCATING MUTATIONS (PUTATIVE DRIVER)	0	0
ALAS2	ALL	4	0.0184332	AMPLIFICATION	2	0.00921659	DEEP DELETION	1	0.00460829	mRNA HIGH	1	0.00460829	mRNA LOW	0	0	FUSION	0	0	MISSENSE, INFRAME, TRUNCATING MUTATIONS (PUTATIVE DRIVER)	0	0
ALDOA	ALL	11	0.0506912	AMPLIFICATION	0	0	DEEP DELETION	0	0	mRNA HIGH	11	0.0506912	mRNA LOW	0	0	FUSION	0	0	MISSENSE, INFRAME, TRUNCATING MUTATIONS (PUTATIVE DRIVER)	0	0
ALDOB	ALL	1	0.00460829	AMPLIFICATION	0	0	DEEP DELETION	0	0	mRNA HIGH	1	0.00460829	mRNA LOW	0	0	FUSION	0	0	MISSENSE, INFRAME, TRUNCATING MUTATIONS (PUTATIVE DRIVER)	0	0
ALDOC	ALL	9	0.0414747	AMPLIFICATION	0	0	DEEP DELETION	0	0	mRNA HIGH	9	0.0414747	mRNA LOW	0	0	FUSION	0	0	MISSENSE, INFRAME, TRUNCATING MUTATIONS (PUTATIVE DRIVER)	0	0
ANG	ALL	11	0.0506912	AMPLIFICATION	1	0.00460829	DEEP DELETION	0	0	mRNA HIGH	10	0.0460829	mRNA LOW	0	0	FUSION	0	0	MISSENSE, INFRAME, TRUNCATING MUTATIONS (PUTATIVE DRIVER)	0	0
ANGPT1	ALL	21	0.0967742	AMPLIFICATION	3	0.0138249	DEEP DELETION	0	0	mRNA HIGH	18	0.0829493	mRNA LOW	0	0	FUSION	0	0	MISSENSE, INFRAME, TRUNCATING MUTATIONS (PUTATIVE DRIVER)	0	0
ANGPT2	ALL	8	0.0368664	AMPLIFICATION	0	0	DEEP DELETION	1	0.00460829	mRNA HIGH	7	0.0322581	mRNA LOW	0	0	FUSION	0	0	MISSENSE, INFRAME, TRUNCATING MUTATIONS (PUTATIVE DRIVER)	0	0
ANGPT4	ALL	6	0.0276498	AMPLIFICATION	0	0	DEEP DELETION	1	0.00460829	mRNA HIGH	5	0.0230415	mRNA LOW	0	0	FUSION	0	0	MISSENSE, INFRAME, TRUNCATING MUTATIONS (PUTATIVE DRIVER)	0	0
ANGPTL4	ALL	22	0.101382	AMPLIFICATION	5	0.0230415	DEEP DELETION	3	0.0138249	mRNA HIGH	14	0.0645161	mRNA LOW	0	0	FUSION	0	0	MISSENSE, INFRAME, TRUNCATING MUTATIONS (PUTATIVE DRIVER)	0	0
AQP1	ALL	7	0.0322581	AMPLIFICATION	1	0.00460829	DEEP DELETION	0	0	mRNA HIGH	6	0.0276498	mRNA LOW	0	0	FUSION	0	0	MISSENSE, INFRAME, TRUNCATING MUTATIONS (PUTATIVE DRIVER)	0	0
ARG2	ALL	13	0.0599078	AMPLIFICATION	1	0.00460829	DEEP DELETION	0	0	mRNA HIGH	12	0.0552995	mRNA LOW	0	0	FUSION	0	0	MISSENSE, INFRAME, TRUNCATING MUTATIONS (PUTATIVE DRIVER)	0	0
ARNT	ALL	54	0.248848	AMPLIFICATION	4	0.0184332	DEEP DELETION	0	0	mRNA HIGH	47	0.21659	mRNA LOW	3	0.0138249	FUSION	0	0	MISSENSE, INFRAME, TRUNCATING MUTATIONS (PUTATIVE DRIVER)	0	0
ARNT2	ALL	13	0.0599078	AMPLIFICATION	1	0.00460829	DEEP DELETION	0	0	mRNA HIGH	12	0.0552995	mRNA LOW	0	0	FUSION	0	0	MISSENSE, INFRAME, TRUNCATING MUTATIONS (PUTATIVE DRIVER)	0	0
ASCL2	ALL	6	0.0276498	AMPLIFICATION	0	0	DEEP DELETION	0	0	mRNA HIGH	6	0.0276498	mRNA LOW	0	0	FUSION	0	0	MISSENSE, INFRAME, TRUNCATING MUTATIONS (PUTATIVE DRIVER)	0	0
ATP1A1	ALL	12	0.0552995	AMPLIFICATION	0	0	DEEP DELETION	1	0.00460829	mRNA HIGH	11	0.0506912	mRNA LOW	0	0	FUSION	0	0	MISSENSE, INFRAME, TRUNCATING MUTATIONS (PUTATIVE DRIVER)	0	0
ATP1A2	ALL	5	0.0230415	AMPLIFICATION	3	0.0138249	DEEP DELETION	0	0	mRNA HIGH	2	0.00921659	mRNA LOW	0	0	FUSION	0	0	MISSENSE, INFRAME, TRUNCATING MUTATIONS (PUTATIVE DRIVER)	0	0
ATP1B1	ALL	14	0.0645161	AMPLIFICATION	2	0.00921659	DEEP DELETION	0	0	mRNA HIGH	12	0.0552995	mRNA LOW	0	0	FUSION	0	0	MISSENSE, INFRAME, TRUNCATING MUTATIONS (PUTATIVE DRIVER)	0	0
BACH1	ALL	6	0.0276498	AMPLIFICATION	0	0	DEEP DELETION	0	0	mRNA HIGH	6	0.0276498	mRNA LOW	0	0	FUSION	0	0	MISSENSE, INFRAME, TRUNCATING MUTATIONS (PUTATIVE DRIVER)	0	0
BAD	ALL	12	0.0552995	AMPLIFICATION	1	0.00460829	DEEP DELETION	0	0	mRNA HIGH	10	0.0460829	mRNA LOW	0	0	FUSION	1	0.00460829	MISSENSE, INFRAME, TRUNCATING MUTATIONS (PUTATIVE DRIVER)	0	0
BBC3	ALL	21	0.0967742	AMPLIFICATION	2	0.00921659	DEEP DELETION	0	0	mRNA HIGH	19	0.0875576	mRNA LOW	0	0	FUSION	0	0	MISSENSE, INFRAME, TRUNCATING MUTATIONS (PUTATIVE DRIVER)	0	0
BCL2	ALL	18	0.0829493	AMPLIFICATION	1	0.00460829	DEEP DELETION	0	0	mRNA HIGH	17	0.078341	mRNA LOW	0	0	FUSION	0	0	MISSENSE, INFRAME, TRUNCATING MUTATIONS (PUTATIVE DRIVER)	0	0
BNIP3	ALL	13	0.0599078	AMPLIFICATION	0	0	DEEP DELETION	1	0.00460829	mRNA HIGH	12	0.0552995	mRNA LOW	0	0	FUSION	0	0	MISSENSE, INFRAME, TRUNCATING MUTATIONS (PUTATIVE DRIVER)	0	0
CAMK2A	ALL	11	0.0506912	AMPLIFICATION	0	0	DEEP DELETION	0	0	mRNA HIGH	11	0.0506912	mRNA LOW	0	0	FUSION	0	0	MISSENSE, INFRAME, TRUNCATING MUTATIONS (PUTATIVE DRIVER)	0	0
CAMK2B	ALL	6	0.0276498	AMPLIFICATION	0	0	DEEP DELETION	0	0	mRNA HIGH	6	0.0276498	mRNA LOW	0	0	FUSION	0	0	MISSENSE, INFRAME, TRUNCATING MUTATIONS (PUTATIVE DRIVER)	0	0
CAMK2D	ALL	8	0.0368664	AMPLIFICATION	0	0	DEEP DELETION	0	0	mRNA HIGH	8	0.0368664	mRNA LOW	0	0	FUSION	0	0	MISSENSE, INFRAME, TRUNCATING MUTATIONS (PUTATIVE DRIVER)	0	0
CAMK2G	ALL	7	0.0322581	AMPLIFICATION	0	0	DEEP DELETION	1	0.00460829	mRNA HIGH	5	0.0230415	mRNA LOW	1	0.00460829	FUSION	0	0	MISSENSE, INFRAME, TRUNCATING MUTATIONS (PUTATIVE DRIVER)	0	0
CASR	ALL	14	0.0645161	AMPLIFICATION	11	0.0506912	DEEP DELETION	0	0	mRNA HIGH	3	0.0138249	mRNA LOW	0	0	FUSION	0	0	MISSENSE, INFRAME, TRUNCATING MUTATIONS (PUTATIVE DRIVER)	0	0
CAV1	ALL	18	0.0829493	AMPLIFICATION	0	0	DEEP DELETION	0	0	mRNA HIGH	18	0.0829493	mRNA LOW	0	0	FUSION	0	0	MISSENSE, INFRAME, TRUNCATING MUTATIONS (PUTATIVE DRIVER)	0	0
CCL2	ALL	6	0.0276498	AMPLIFICATION	1	0.00460829	DEEP DELETION	1	0.00460829	mRNA HIGH	4	0.0184332	mRNA LOW	0	0	FUSION	0	0	MISSENSE, INFRAME, TRUNCATING MUTATIONS (PUTATIVE DRIVER)	0	0
CD24	ALL	0	0	AMPLIFICATION	0	0	DEEP DELETION	0	0	mRNA HIGH	0	0	mRNA LOW	0	0	FUSION	0	0	MISSENSE, INFRAME, TRUNCATING MUTATIONS (PUTATIVE DRIVER)	0	0
CDH1	ALL	9	0.0414747	AMPLIFICATION	0	0	DEEP DELETION	1	0.00460829	mRNA HIGH	8	0.0368664	mRNA LOW	0	0	FUSION	0	0	MISSENSE, INFRAME, TRUNCATING MUTATIONS (PUTATIVE DRIVER)	0	0
CDKN1A	ALL	11	0.0506912	AMPLIFICATION	0	0	DEEP DELETION	0	0	mRNA HIGH	11	0.0506912	mRNA LOW	0	0	FUSION	0	0	MISSENSE, INFRAME, TRUNCATING MUTATIONS (PUTATIVE DRIVER)	0	0
CDKN1B	ALL	12	0.0552995	AMPLIFICATION	0	0	DEEP DELETION	0	0	mRNA HIGH	12	0.0552995	mRNA LOW	0	0	FUSION	0	0	MISSENSE, INFRAME, TRUNCATING MUTATIONS (PUTATIVE DRIVER)	0	0
CHRNA7	ALL	12	0.0552995	AMPLIFICATION	0	0	DEEP DELETION	0	0	mRNA HIGH	12	0.0552995	mRNA LOW	0	0	FUSION	0	0	MISSENSE, INFRAME, TRUNCATING MUTATIONS (PUTATIVE DRIVER)	0	0
CHRNB2	ALL	16	0.0737327	AMPLIFICATION	4	0.0184332	DEEP DELETION	0	0	mRNA HIGH	12	0.0552995	mRNA LOW	0	0	FUSION	0	0	MISSENSE, INFRAME, TRUNCATING MUTATIONS (PUTATIVE DRIVER)	0	0
CIAO3	ALL	14	0.0645161	AMPLIFICATION	1	0.00460829	DEEP DELETION	1	0.00460829	mRNA HIGH	12	0.0552995	mRNA LOW	0	0	FUSION	0	0	MISSENSE, INFRAME, TRUNCATING MUTATIONS (PUTATIVE DRIVER)	0	0
CITED2	ALL	14	0.0645161	AMPLIFICATION	0	0	DEEP DELETION	1	0.00460829	mRNA HIGH	13	0.0599078	mRNA LOW	0	0	FUSION	0	0	MISSENSE, INFRAME, TRUNCATING MUTATIONS (PUTATIVE DRIVER)	0	0
CLDN3	ALL	13	0.0599078	AMPLIFICATION	2	0.00921659	DEEP DELETION	0	0	mRNA HIGH	11	0.0506912	mRNA LOW	0	0	FUSION	0	0	MISSENSE, INFRAME, TRUNCATING MUTATIONS (PUTATIVE DRIVER)	0	0
COPS5	ALL	28	0.129032	AMPLIFICATION	1	0.00460829	DEEP DELETION	0	0	mRNA HIGH	23	0.105991	mRNA LOW	4	0.0184332	FUSION	0	0	MISSENSE, INFRAME, TRUNCATING MUTATIONS (PUTATIVE DRIVER)	0	0
CREBBP	ALL	33	0.152074	AMPLIFICATION	2	0.00921659	DEEP DELETION	0	0	mRNA HIGH	22	0.101382	mRNA LOW	3	0.0138249	FUSION	0	0	MISSENSE, INFRAME, TRUNCATING MUTATIONS (PUTATIVE DRIVER)	6	0.0276498
CUL2	ALL	9	0.0414747	AMPLIFICATION	1	0.00460829	DEEP DELETION	0	0	mRNA HIGH	5	0.0230415	mRNA LOW	3	0.0138249	FUSION	0	0	MISSENSE, INFRAME, TRUNCATING MUTATIONS (PUTATIVE DRIVER)	0	0
CXCR4	ALL	6	0.0276498	AMPLIFICATION	0	0	DEEP DELETION	0	0	mRNA HIGH	6	0.0276498	mRNA LOW	0	0	FUSION	0	0	MISSENSE, INFRAME, TRUNCATING MUTATIONS (PUTATIVE DRIVER)	0	0
CYBB	ALL	9	0.0414747	AMPLIFICATION	2	0.00921659	DEEP DELETION	2	0.00921659	mRNA HIGH	5	0.0230415	mRNA LOW	0	0	FUSION	0	0	MISSENSE, INFRAME, TRUNCATING MUTATIONS (PUTATIVE DRIVER)	0	0
CYP1A1	ALL	5	0.0230415	AMPLIFICATION	0	0	DEEP DELETION	0	0	mRNA HIGH	5	0.0230415	mRNA LOW	0	0	FUSION	0	0	MISSENSE, INFRAME, TRUNCATING MUTATIONS (PUTATIVE DRIVER)	0	0
DDIT4	ALL	7	0.0322581	AMPLIFICATION	0	0	DEEP DELETION	0	0	mRNA HIGH	7	0.0322581	mRNA LOW	0	0	FUSION	0	0	MISSENSE, INFRAME, TRUNCATING MUTATIONS (PUTATIVE DRIVER)	0	0
DPP4	ALL	7	0.0322581	AMPLIFICATION	0	0	DEEP DELETION	0	0	mRNA HIGH	7	0.0322581	mRNA LOW	0	0	FUSION	0	0	MISSENSE, INFRAME, TRUNCATING MUTATIONS (PUTATIVE DRIVER)	0	0
E2F1	ALL	49	0.225806	AMPLIFICATION	7	0.0322581	DEEP DELETION	0	0	mRNA HIGH	42	0.193548	mRNA LOW	0	0	FUSION	0	0	MISSENSE, INFRAME, TRUNCATING MUTATIONS (PUTATIVE DRIVER)	0	0
EDN1	ALL	12	0.0552995	AMPLIFICATION	1	0.00460829	DEEP DELETION	2	0.00921659	mRNA HIGH	9	0.0414747	mRNA LOW	0	0	FUSION	0	0	MISSENSE, INFRAME, TRUNCATING MUTATIONS (PUTATIVE DRIVER)	0	0
EDNRA	ALL	9	0.0414747	AMPLIFICATION	0	0	DEEP DELETION	2	0.00921659	mRNA HIGH	7	0.0322581	mRNA LOW	0	0	FUSION	0	0	MISSENSE, INFRAME, TRUNCATING MUTATIONS (PUTATIVE DRIVER)	0	0
EDNRB	ALL	10	0.0460829	AMPLIFICATION	1	0.00460829	DEEP DELETION	1	0.00460829	mRNA HIGH	8	0.0368664	mRNA LOW	0	0	FUSION	0	0	MISSENSE, INFRAME, TRUNCATING MUTATIONS (PUTATIVE DRIVER)	0	0
EGF	ALL	5	0.0230415	AMPLIFICATION	0	0	DEEP DELETION	0	0	mRNA HIGH	5	0.0230415	mRNA LOW	0	0	FUSION	0	0	MISSENSE, INFRAME, TRUNCATING MUTATIONS (PUTATIVE DRIVER)	0	0
EGFR	ALL	23	0.105991	AMPLIFICATION	6	0.0276498	DEEP DELETION	0	0	mRNA HIGH	16	0.0737327	mRNA LOW	0	0	FUSION	0	0	MISSENSE, INFRAME, TRUNCATING MUTATIONS (PUTATIVE DRIVER)	1	0.00460829
EGLN1	ALL	22	0.101382	AMPLIFICATION	1	0.00460829	DEEP DELETION	1	0.00460829	mRNA HIGH	20	0.0921659	mRNA LOW	0	0	FUSION	0	0	MISSENSE, INFRAME, TRUNCATING MUTATIONS (PUTATIVE DRIVER)	0	0
EGLN2	ALL	18	0.0829493	AMPLIFICATION	2	0.00921659	DEEP DELETION	0	0	mRNA HIGH	16	0.0737327	mRNA LOW	0	0	FUSION	0	0	MISSENSE, INFRAME, TRUNCATING MUTATIONS (PUTATIVE DRIVER)	0	0
EGLN3	ALL	11	0.0506912	AMPLIFICATION	2	0.00921659	DEEP DELETION	0	0	mRNA HIGH	8	0.0368664	mRNA LOW	0	0	FUSION	1	0.00460829	MISSENSE, INFRAME, TRUNCATING MUTATIONS (PUTATIVE DRIVER)	0	0
EIF4E	ALL	17	0.078341	AMPLIFICATION	0	0	DEEP DELETION	0	0	mRNA HIGH	8	0.0368664	mRNA LOW	9	0.0414747	FUSION	0	0	MISSENSE, INFRAME, TRUNCATING MUTATIONS (PUTATIVE DRIVER)	0	0
EIF4E1B	ALL	6	0.0276498	AMPLIFICATION	1	0.00460829	DEEP DELETION	0	0	mRNA HIGH	5	0.0230415	mRNA LOW	0	0	FUSION	0	0	MISSENSE, INFRAME, TRUNCATING MUTATIONS (PUTATIVE DRIVER)	0	0
EIF4E2	ALL	15	0.0691244	AMPLIFICATION	0	0	DEEP DELETION	7	0.0322581	mRNA HIGH	8	0.0368664	mRNA LOW	0	0	FUSION	0	0	MISSENSE, INFRAME, TRUNCATING MUTATIONS (PUTATIVE DRIVER)	0	0
EIF4EBP1	ALL	12	0.0552995	AMPLIFICATION	2	0.00921659	DEEP DELETION	0	0	mRNA HIGH	10	0.0460829	mRNA LOW	0	0	FUSION	0	0	MISSENSE, INFRAME, TRUNCATING MUTATIONS (PUTATIVE DRIVER)	0	0
ELF2	ALL	27	0.124424	AMPLIFICATION	0	0	DEEP DELETION	1	0.00460829	mRNA HIGH	11	0.0506912	mRNA LOW	15	0.0691244	FUSION	0	0	MISSENSE, INFRAME, TRUNCATING MUTATIONS (PUTATIVE DRIVER)	0	0
ELOB	ALL	11	0.0506912	AMPLIFICATION	1	0.00460829	DEEP DELETION	0	0	mRNA HIGH	10	0.0460829	mRNA LOW	0	0	FUSION	0	0	MISSENSE, INFRAME, TRUNCATING MUTATIONS (PUTATIVE DRIVER)	0	0
ELOC	ALL	29	0.133641	AMPLIFICATION	2	0.00921659	DEEP DELETION	0	0	mRNA HIGH	27	0.124424	mRNA LOW	0	0	FUSION	0	0	MISSENSE, INFRAME, TRUNCATING MUTATIONS (PUTATIVE DRIVER)	0	0
ENG	ALL	9	0.0414747	AMPLIFICATION	0	0	DEEP DELETION	0	0	mRNA HIGH	9	0.0414747	mRNA LOW	0	0	FUSION	0	0	MISSENSE, INFRAME, TRUNCATING MUTATIONS (PUTATIVE DRIVER)	0	0
ENO1	ALL	16	0.0737327	AMPLIFICATION	0	0	DEEP DELETION	2	0.00921659	mRNA HIGH	14	0.0645161	mRNA LOW	0	0	FUSION	0	0	MISSENSE, INFRAME, TRUNCATING MUTATIONS (PUTATIVE DRIVER)	0	0
ENO2	ALL	12	0.0552995	AMPLIFICATION	1	0.00460829	DEEP DELETION	0	0	mRNA HIGH	11	0.0506912	mRNA LOW	0	0	FUSION	0	0	MISSENSE, INFRAME, TRUNCATING MUTATIONS (PUTATIVE DRIVER)	0	0
ENO3	ALL	19	0.0875576	AMPLIFICATION	0	0	DEEP DELETION	3	0.0138249	mRNA HIGH	16	0.0737327	mRNA LOW	0	0	FUSION	0	0	MISSENSE, INFRAME, TRUNCATING MUTATIONS (PUTATIVE DRIVER)	0	0
ENO4	ALL	0	0	AMPLIFICATION	0	0	DEEP DELETION	0	0	mRNA HIGH	0	0	mRNA LOW	0	0	FUSION	0	0	MISSENSE, INFRAME, TRUNCATING MUTATIONS (PUTATIVE DRIVER)	0	0
EP300	ALL	39	0.179724	AMPLIFICATION	2	0.00921659	DEEP DELETION	1	0.00460829	mRNA HIGH	10	0.0460829	mRNA LOW	6	0.0276498	FUSION	0	0	MISSENSE, INFRAME, TRUNCATING MUTATIONS (PUTATIVE DRIVER)	20	0.0921659
EPAS1	ALL	13	0.0599078	AMPLIFICATION	1	0.00460829	DEEP DELETION	0	0	mRNA HIGH	12	0.0552995	mRNA LOW	0	0	FUSION	0	0	MISSENSE, INFRAME, TRUNCATING MUTATIONS (PUTATIVE DRIVER)	0	0
EPO	ALL	3	0.0138249	AMPLIFICATION	1	0.00460829	DEEP DELETION	0	0	mRNA HIGH	2	0.00921659	mRNA LOW	0	0	FUSION	0	0	MISSENSE, INFRAME, TRUNCATING MUTATIONS (PUTATIVE DRIVER)	0	0
ERBB2	ALL	52	0.239631	AMPLIFICATION	13	0.0599078	DEEP DELETION	0	0	mRNA HIGH	28	0.129032	mRNA LOW	0	0	FUSION	3	0.0138249	MISSENSE, INFRAME, TRUNCATING MUTATIONS (PUTATIVE DRIVER)	8	0.0368664
ETS1	ALL	9	0.0414747	AMPLIFICATION	1	0.00460829	DEEP DELETION	5	0.0230415	mRNA HIGH	3	0.0138249	mRNA LOW	0	0	FUSION	0	0	MISSENSE, INFRAME, TRUNCATING MUTATIONS (PUTATIVE DRIVER)	0	0
FLT1	ALL	6	0.0276498	AMPLIFICATION	0	0	DEEP DELETION	0	0	mRNA HIGH	6	0.0276498	mRNA LOW	0	0	FUSION	0	0	MISSENSE, INFRAME, TRUNCATING MUTATIONS (PUTATIVE DRIVER)	0	0
GAPDH	ALL	21	0.0967742	AMPLIFICATION	1	0.00460829	DEEP DELETION	0	0	mRNA HIGH	19	0.0875576	mRNA LOW	0	0	FUSION	1	0.00460829	MISSENSE, INFRAME, TRUNCATING MUTATIONS (PUTATIVE DRIVER)	0	0
GATA6	ALL	14	0.0645161	AMPLIFICATION	1	0.00460829	DEEP DELETION	0	0	mRNA HIGH	13	0.0599078	mRNA LOW	0	0	FUSION	0	0	MISSENSE, INFRAME, TRUNCATING MUTATIONS (PUTATIVE DRIVER)	0	0
HBB	ALL	0	0	AMPLIFICATION	0	0	DEEP DELETION	0	0	mRNA HIGH	0	0	mRNA LOW	0	0	FUSION	0	0	MISSENSE, INFRAME, TRUNCATING MUTATIONS (PUTATIVE DRIVER)	0	0
HBG2	ALL	0	0	AMPLIFICATION	0	0	DEEP DELETION	0	0	mRNA HIGH	0	0	mRNA LOW	0	0	FUSION	0	0	MISSENSE, INFRAME, TRUNCATING MUTATIONS (PUTATIVE DRIVER)	0	0
HIF1A	ALL	12	0.0552995	AMPLIFICATION	1	0.00460829	DEEP DELETION	0	0	mRNA HIGH	11	0.0506912	mRNA LOW	0	0	FUSION	0	0	MISSENSE, INFRAME, TRUNCATING MUTATIONS (PUTATIVE DRIVER)	0	0
HIF3A	ALL	11	0.0506912	AMPLIFICATION	2	0.00921659	DEEP DELETION	0	0	mRNA HIGH	8	0.0368664	mRNA LOW	0	0	FUSION	1	0.00460829	MISSENSE, INFRAME, TRUNCATING MUTATIONS (PUTATIVE DRIVER)	0	0
HK1	ALL	7	0.0322581	AMPLIFICATION	0	0	DEEP DELETION	0	0	mRNA HIGH	3	0.0138249	mRNA LOW	4	0.0184332	FUSION	0	0	MISSENSE, INFRAME, TRUNCATING MUTATIONS (PUTATIVE DRIVER)	0	0
HK2	ALL	10	0.0460829	AMPLIFICATION	0	0	DEEP DELETION	0	0	mRNA HIGH	10	0.0460829	mRNA LOW	0	0	FUSION	0	0	MISSENSE, INFRAME, TRUNCATING MUTATIONS (PUTATIVE DRIVER)	0	0
HK3	ALL	12	0.0552995	AMPLIFICATION	1	0.00460829	DEEP DELETION	0	0	mRNA HIGH	11	0.0506912	mRNA LOW	0	0	FUSION	0	0	MISSENSE, INFRAME, TRUNCATING MUTATIONS (PUTATIVE DRIVER)	0	0
HKDC1	ALL	5	0.0230415	AMPLIFICATION	0	0	DEEP DELETION	0	0	mRNA HIGH	5	0.0230415	mRNA LOW	0	0	FUSION	0	0	MISSENSE, INFRAME, TRUNCATING MUTATIONS (PUTATIVE DRIVER)	0	0
HMBS	ALL	13	0.0599078	AMPLIFICATION	0	0	DEEP DELETION	5	0.0230415	mRNA HIGH	8	0.0368664	mRNA LOW	0	0	FUSION	0	0	MISSENSE, INFRAME, TRUNCATING MUTATIONS (PUTATIVE DRIVER)	0	0
HMOX1	ALL	8	0.0368664	AMPLIFICATION	1	0.00460829	DEEP DELETION	0	0	mRNA HIGH	7	0.0322581	mRNA LOW	0	0	FUSION	0	0	MISSENSE, INFRAME, TRUNCATING MUTATIONS (PUTATIVE DRIVER)	0	0
HMOX2	ALL	18	0.0829493	AMPLIFICATION	2	0.00921659	DEEP DELETION	0	0	mRNA HIGH	16	0.0737327	mRNA LOW	0	0	FUSION	0	0	MISSENSE, INFRAME, TRUNCATING MUTATIONS (PUTATIVE DRIVER)	0	0
HSP90B1	ALL	11	0.0506912	AMPLIFICATION	0	0	DEEP DELETION	0	0	mRNA HIGH	11	0.0506912	mRNA LOW	0	0	FUSION	0	0	MISSENSE, INFRAME, TRUNCATING MUTATIONS (PUTATIVE DRIVER)	0	0
HYOU1	ALL	10	0.0460829	AMPLIFICATION	0	0	DEEP DELETION	5	0.0230415	mRNA HIGH	5	0.0230415	mRNA LOW	0	0	FUSION	0	0	MISSENSE, INFRAME, TRUNCATING MUTATIONS (PUTATIVE DRIVER)	0	0
IFNG	ALL	13	0.0599078	AMPLIFICATION	1	0.00460829	DEEP DELETION	0	0	mRNA HIGH	12	0.0552995	mRNA LOW	0	0	FUSION	0	0	MISSENSE, INFRAME, TRUNCATING MUTATIONS (PUTATIVE DRIVER)	0	0
IFNGR1	ALL	8	0.0368664	AMPLIFICATION	0	0	DEEP DELETION	0	0	mRNA HIGH	8	0.0368664	mRNA LOW	0	0	FUSION	0	0	MISSENSE, INFRAME, TRUNCATING MUTATIONS (PUTATIVE DRIVER)	0	0
IFNGR2	ALL	14	0.0645161	AMPLIFICATION	0	0	DEEP DELETION	0	0	mRNA HIGH	11	0.0506912	mRNA LOW	3	0.0138249	FUSION	0	0	MISSENSE, INFRAME, TRUNCATING MUTATIONS (PUTATIVE DRIVER)	0	0
IGF1	ALL	4	0.0184332	AMPLIFICATION	0	0	DEEP DELETION	0	0	mRNA HIGH	4	0.0184332	mRNA LOW	0	0	FUSION	0	0	MISSENSE, INFRAME, TRUNCATING MUTATIONS (PUTATIVE DRIVER)	0	0
IGF1R	ALL	16	0.0737327	AMPLIFICATION	3	0.0138249	DEEP DELETION	0	0	mRNA HIGH	13	0.0599078	mRNA LOW	0	0	FUSION	0	0	MISSENSE, INFRAME, TRUNCATING MUTATIONS (PUTATIVE DRIVER)	0	0
IGFBP1	ALL	7	0.0322581	AMPLIFICATION	0	0	DEEP DELETION	0	0	mRNA HIGH	7	0.0322581	mRNA LOW	0	0	FUSION	0	0	MISSENSE, INFRAME, TRUNCATING MUTATIONS (PUTATIVE DRIVER)	0	0
IGFBP2	ALL	9	0.0414747	AMPLIFICATION	0	0	DEEP DELETION	6	0.0276498	mRNA HIGH	3	0.0138249	mRNA LOW	0	0	FUSION	0	0	MISSENSE, INFRAME, TRUNCATING MUTATIONS (PUTATIVE DRIVER)	0	0
IL1A	ALL	8	0.0368664	AMPLIFICATION	0	0	DEEP DELETION	0	0	mRNA HIGH	8	0.0368664	mRNA LOW	0	0	FUSION	0	0	MISSENSE, INFRAME, TRUNCATING MUTATIONS (PUTATIVE DRIVER)	0	0
IL1B	ALL	7	0.0322581	AMPLIFICATION	0	0	DEEP DELETION	0	0	mRNA HIGH	7	0.0322581	mRNA LOW	0	0	FUSION	0	0	MISSENSE, INFRAME, TRUNCATING MUTATIONS (PUTATIVE DRIVER)	0	0
IL6	ALL	9	0.0414747	AMPLIFICATION	1	0.00460829	DEEP DELETION	0	0	mRNA HIGH	8	0.0368664	mRNA LOW	0	0	FUSION	0	0	MISSENSE, INFRAME, TRUNCATING MUTATIONS (PUTATIVE DRIVER)	0	0
IL6R	ALL	12	0.0552995	AMPLIFICATION	4	0.0184332	DEEP DELETION	0	0	mRNA HIGH	8	0.0368664	mRNA LOW	0	0	FUSION	0	0	MISSENSE, INFRAME, TRUNCATING MUTATIONS (PUTATIVE DRIVER)	0	0
INS	ALL	1	0.00460829	AMPLIFICATION	0	0	DEEP DELETION	0	0	mRNA HIGH	1	0.00460829	mRNA LOW	0	0	FUSION	0	0	MISSENSE, INFRAME, TRUNCATING MUTATIONS (PUTATIVE DRIVER)	0	0
INSR	ALL	13	0.0599078	AMPLIFICATION	2	0.00921659	DEEP DELETION	4	0.0184332	mRNA HIGH	7	0.0322581	mRNA LOW	0	0	FUSION	0	0	MISSENSE, INFRAME, TRUNCATING MUTATIONS (PUTATIVE DRIVER)	0	0
ITPR1	ALL	11	0.0506912	AMPLIFICATION	0	0	DEEP DELETION	1	0.00460829	mRNA HIGH	9	0.0414747	mRNA LOW	0	0	FUSION	1	0.00460829	MISSENSE, INFRAME, TRUNCATING MUTATIONS (PUTATIVE DRIVER)	0	0
ITPR2	ALL	16	0.0737327	AMPLIFICATION	3	0.0138249	DEEP DELETION	0	0	mRNA HIGH	13	0.0599078	mRNA LOW	0	0	FUSION	0	0	MISSENSE, INFRAME, TRUNCATING MUTATIONS (PUTATIVE DRIVER)	0	0
KCNK3	ALL	16	0.0737327	AMPLIFICATION	3	0.0138249	DEEP DELETION	0	0	mRNA HIGH	13	0.0599078	mRNA LOW	0	0	FUSION	0	0	MISSENSE, INFRAME, TRUNCATING MUTATIONS (PUTATIVE DRIVER)	0	0
KCNMA1	ALL	10	0.0460829	AMPLIFICATION	0	0	DEEP DELETION	0	0	mRNA HIGH	10	0.0460829	mRNA LOW	0	0	FUSION	0	0	MISSENSE, INFRAME, TRUNCATING MUTATIONS (PUTATIVE DRIVER)	0	0
LDHA	ALL	7	0.0322581	AMPLIFICATION	0	0	DEEP DELETION	0	0	mRNA HIGH	7	0.0322581	mRNA LOW	0	0	FUSION	0	0	MISSENSE, INFRAME, TRUNCATING MUTATIONS (PUTATIVE DRIVER)	0	0
LDHAL6A	ALL	3	0.0138249	AMPLIFICATION	0	0	DEEP DELETION	0	0	mRNA HIGH	3	0.0138249	mRNA LOW	0	0	FUSION	0	0	MISSENSE, INFRAME, TRUNCATING MUTATIONS (PUTATIVE DRIVER)	0	0
LDHAL6B	ALL	13	0.0599078	AMPLIFICATION	0	0	DEEP DELETION	0	0	mRNA HIGH	13	0.0599078	mRNA LOW	0	0	FUSION	0	0	MISSENSE, INFRAME, TRUNCATING MUTATIONS (PUTATIVE DRIVER)	0	0
LDHB	ALL	13	0.0599078	AMPLIFICATION	0	0	DEEP DELETION	0	0	mRNA HIGH	13	0.0599078	mRNA LOW	0	0	FUSION	0	0	MISSENSE, INFRAME, TRUNCATING MUTATIONS (PUTATIVE DRIVER)	0	0
LDHC	ALL	8	0.0368664	AMPLIFICATION	0	0	DEEP DELETION	0	0	mRNA HIGH	8	0.0368664	mRNA LOW	0	0	FUSION	0	0	MISSENSE, INFRAME, TRUNCATING MUTATIONS (PUTATIVE DRIVER)	0	0
LMNA	ALL	27	0.124424	AMPLIFICATION	4	0.0184332	DEEP DELETION	0	0	mRNA HIGH	23	0.105991	mRNA LOW	0	0	FUSION	0	0	MISSENSE, INFRAME, TRUNCATING MUTATIONS (PUTATIVE DRIVER)	0	0
LTBR	ALL	21	0.0967742	AMPLIFICATION	3	0.0138249	DEEP DELETION	0	0	mRNA HIGH	15	0.0691244	mRNA LOW	3	0.0138249	FUSION	0	0	MISSENSE, INFRAME, TRUNCATING MUTATIONS (PUTATIVE DRIVER)	0	0
MAP2K1	ALL	14	0.0645161	AMPLIFICATION	0	0	DEEP DELETION	0	0	mRNA HIGH	10	0.0460829	mRNA LOW	1	0.00460829	FUSION	1	0.00460829	MISSENSE, INFRAME, TRUNCATING MUTATIONS (PUTATIVE DRIVER)	2	0.00921659
MAP2K2	ALL	18	0.0829493	AMPLIFICATION	1	0.00460829	DEEP DELETION	5	0.0230415	mRNA HIGH	12	0.0552995	mRNA LOW	0	0	FUSION	0	0	MISSENSE, INFRAME, TRUNCATING MUTATIONS (PUTATIVE DRIVER)	0	0
MAPK1	ALL	28	0.129032	AMPLIFICATION	0	0	DEEP DELETION	0	0	mRNA HIGH	9	0.0414747	mRNA LOW	10	0.0460829	FUSION	0	0	MISSENSE, INFRAME, TRUNCATING MUTATIONS (PUTATIVE DRIVER)	9	0.0414747
MAPK3	ALL	8	0.0368664	AMPLIFICATION	0	0	DEEP DELETION	0	0	mRNA HIGH	8	0.0368664	mRNA LOW	0	0	FUSION	0	0	MISSENSE, INFRAME, TRUNCATING MUTATIONS (PUTATIVE DRIVER)	0	0
MDM2	ALL	18	0.0829493	AMPLIFICATION	2	0.00921659	DEEP DELETION	0	0	mRNA HIGH	15	0.0691244	mRNA LOW	1	0.00460829	FUSION	0	0	MISSENSE, INFRAME, TRUNCATING MUTATIONS (PUTATIVE DRIVER)	0	0
MDM4	ALL	27	0.124424	AMPLIFICATION	1	0.00460829	DEEP DELETION	0	0	mRNA HIGH	26	0.119816	mRNA LOW	0	0	FUSION	0	0	MISSENSE, INFRAME, TRUNCATING MUTATIONS (PUTATIVE DRIVER)	0	0
MKNK1	ALL	14	0.0645161	AMPLIFICATION	1	0.00460829	DEEP DELETION	0	0	mRNA HIGH	11	0.0506912	mRNA LOW	2	0.00921659	FUSION	0	0	MISSENSE, INFRAME, TRUNCATING MUTATIONS (PUTATIVE DRIVER)	0	0
MKNK2	ALL	23	0.105991	AMPLIFICATION	4	0.0184332	DEEP DELETION	6	0.0276498	mRNA HIGH	13	0.0599078	mRNA LOW	0	0	FUSION	0	0	MISSENSE, INFRAME, TRUNCATING MUTATIONS (PUTATIVE DRIVER)	0	0
MMP14	ALL	12	0.0552995	AMPLIFICATION	1	0.00460829	DEEP DELETION	0	0	mRNA HIGH	11	0.0506912	mRNA LOW	0	0	FUSION	0	0	MISSENSE, INFRAME, TRUNCATING MUTATIONS (PUTATIVE DRIVER)	0	0
MMP2	ALL	12	0.0552995	AMPLIFICATION	0	0	DEEP DELETION	1	0.00460829	mRNA HIGH	11	0.0506912	mRNA LOW	0	0	FUSION	0	0	MISSENSE, INFRAME, TRUNCATING MUTATIONS (PUTATIVE DRIVER)	0	0
MMP3	ALL	28	0.129032	AMPLIFICATION	16	0.0737327	DEEP DELETION	2	0.00921659	mRNA HIGH	10	0.0460829	mRNA LOW	0	0	FUSION	0	0	MISSENSE, INFRAME, TRUNCATING MUTATIONS (PUTATIVE DRIVER)	0	0
MT3	ALL	11	0.0506912	AMPLIFICATION	0	0	DEEP DELETION	2	0.00921659	mRNA HIGH	9	0.0414747	mRNA LOW	0	0	FUSION	0	0	MISSENSE, INFRAME, TRUNCATING MUTATIONS (PUTATIVE DRIVER)	0	0
MTOR	ALL	28	0.129032	AMPLIFICATION	0	0	DEEP DELETION	1	0.00460829	mRNA HIGH	20	0.0921659	mRNA LOW	3	0.0138249	FUSION	0	0	MISSENSE, INFRAME, TRUNCATING MUTATIONS (PUTATIVE DRIVER)	4	0.0184332
NDRG1	ALL	19	0.0875576	AMPLIFICATION	5	0.0230415	DEEP DELETION	0	0	mRNA HIGH	14	0.0645161	mRNA LOW	0	0	FUSION	0	0	MISSENSE, INFRAME, TRUNCATING MUTATIONS (PUTATIVE DRIVER)	0	0
NFKB1	ALL	8	0.0368664	AMPLIFICATION	0	0	DEEP DELETION	0	0	mRNA HIGH	7	0.0322581	mRNA LOW	1	0.00460829	FUSION	0	0	MISSENSE, INFRAME, TRUNCATING MUTATIONS (PUTATIVE DRIVER)	0	0
NOS1	ALL	8	0.0368664	AMPLIFICATION	1	0.00460829	DEEP DELETION	0	0	mRNA HIGH	7	0.0322581	mRNA LOW	0	0	FUSION	0	0	MISSENSE, INFRAME, TRUNCATING MUTATIONS (PUTATIVE DRIVER)	0	0
NOS2	ALL	10	0.0460829	AMPLIFICATION	0	0	DEEP DELETION	0	0	mRNA HIGH	10	0.0460829	mRNA LOW	0	0	FUSION	0	0	MISSENSE, INFRAME, TRUNCATING MUTATIONS (PUTATIVE DRIVER)	0	0
NOS3	ALL	6	0.0276498	AMPLIFICATION	0	0	DEEP DELETION	0	0	mRNA HIGH	6	0.0276498	mRNA LOW	0	0	FUSION	0	0	MISSENSE, INFRAME, TRUNCATING MUTATIONS (PUTATIVE DRIVER)	0	0
NOTCH1	ALL	16	0.0737327	AMPLIFICATION	0	0	DEEP DELETION	1	0.00460829	mRNA HIGH	11	0.0506912	mRNA LOW	0	0	FUSION	0	0	MISSENSE, INFRAME, TRUNCATING MUTATIONS (PUTATIVE DRIVER)	4	0.0184332
NPEPPS	ALL	11	0.0506912	AMPLIFICATION	0	0	DEEP DELETION	0	0	mRNA HIGH	11	0.0506912	mRNA LOW	0	0	FUSION	0	0	MISSENSE, INFRAME, TRUNCATING MUTATIONS (PUTATIVE DRIVER)	0	0
NPPA	ALL	9	0.0414747	AMPLIFICATION	0	0	DEEP DELETION	1	0.00460829	mRNA HIGH	8	0.0368664	mRNA LOW	0	0	FUSION	0	0	MISSENSE, INFRAME, TRUNCATING MUTATIONS (PUTATIVE DRIVER)	0	0
NPPB	ALL	7	0.0322581	AMPLIFICATION	0	0	DEEP DELETION	1	0.00460829	mRNA HIGH	6	0.0276498	mRNA LOW	0	0	FUSION	0	0	MISSENSE, INFRAME, TRUNCATING MUTATIONS (PUTATIVE DRIVER)	0	0
NR4A2	ALL	10	0.0460829	AMPLIFICATION	0	0	DEEP DELETION	0	0	mRNA HIGH	10	0.0460829	mRNA LOW	0	0	FUSION	0	0	MISSENSE, INFRAME, TRUNCATING MUTATIONS (PUTATIVE DRIVER)	0	0
NRP1	ALL	8	0.0368664	AMPLIFICATION	0	0	DEEP DELETION	0	0	mRNA HIGH	8	0.0368664	mRNA LOW	0	0	FUSION	0	0	MISSENSE, INFRAME, TRUNCATING MUTATIONS (PUTATIVE DRIVER)	0	0
NRP2	ALL	13	0.0599078	AMPLIFICATION	0	0	DEEP DELETION	8	0.0368664	mRNA HIGH	5	0.0230415	mRNA LOW	0	0	FUSION	0	0	MISSENSE, INFRAME, TRUNCATING MUTATIONS (PUTATIVE DRIVER)	0	0
OS9	ALL	11	0.0506912	AMPLIFICATION	0	0	DEEP DELETION	0	0	mRNA HIGH	9	0.0414747	mRNA LOW	2	0.00921659	FUSION	0	0	MISSENSE, INFRAME, TRUNCATING MUTATIONS (PUTATIVE DRIVER)	0	0
PAM	ALL	11	0.0506912	AMPLIFICATION	0	0	DEEP DELETION	1	0.00460829	mRNA HIGH	10	0.0460829	mRNA LOW	0	0	FUSION	0	0	MISSENSE, INFRAME, TRUNCATING MUTATIONS (PUTATIVE DRIVER)	0	0
PDE5A	ALL	6	0.0276498	AMPLIFICATION	0	0	DEEP DELETION	0	0	mRNA HIGH	6	0.0276498	mRNA LOW	0	0	FUSION	0	0	MISSENSE, INFRAME, TRUNCATING MUTATIONS (PUTATIVE DRIVER)	0	0
PDGFB	ALL	17	0.078341	AMPLIFICATION	1	0.00460829	DEEP DELETION	0	0	mRNA HIGH	16	0.0737327	mRNA LOW	0	0	FUSION	0	0	MISSENSE, INFRAME, TRUNCATING MUTATIONS (PUTATIVE DRIVER)	0	0
PDHA1	ALL	22	0.101382	AMPLIFICATION	3	0.0138249	DEEP DELETION	0	0	mRNA HIGH	19	0.0875576	mRNA LOW	0	0	FUSION	0	0	MISSENSE, INFRAME, TRUNCATING MUTATIONS (PUTATIVE DRIVER)	0	0
PDHA2	ALL	8	0.0368664	AMPLIFICATION	0	0	DEEP DELETION	0	0	mRNA HIGH	8	0.0368664	mRNA LOW	0	0	FUSION	0	0	MISSENSE, INFRAME, TRUNCATING MUTATIONS (PUTATIVE DRIVER)	0	0
PDHB	ALL	43	0.198157	AMPLIFICATION	0	0	DEEP DELETION	1	0.00460829	mRNA HIGH	11	0.0506912	mRNA LOW	31	0.142857	FUSION	0	0	MISSENSE, INFRAME, TRUNCATING MUTATIONS (PUTATIVE DRIVER)	0	0
PDIA2	ALL	15	0.0691244	AMPLIFICATION	1	0.00460829	DEEP DELETION	1	0.00460829	mRNA HIGH	13	0.0599078	mRNA LOW	0	0	FUSION	0	0	MISSENSE, INFRAME, TRUNCATING MUTATIONS (PUTATIVE DRIVER)	0	0
PDK1	ALL	10	0.0460829	AMPLIFICATION	1	0.00460829	DEEP DELETION	0	0	mRNA HIGH	9	0.0414747	mRNA LOW	0	0	FUSION	0	0	MISSENSE, INFRAME, TRUNCATING MUTATIONS (PUTATIVE DRIVER)	0	0
PFKFB3	ALL	8	0.0368664	AMPLIFICATION	0	0	DEEP DELETION	0	0	mRNA HIGH	8	0.0368664	mRNA LOW	0	0	FUSION	0	0	MISSENSE, INFRAME, TRUNCATING MUTATIONS (PUTATIVE DRIVER)	0	0
PFKL	ALL	18	0.0829493	AMPLIFICATION	2	0.00921659	DEEP DELETION	0	0	mRNA HIGH	15	0.0691244	mRNA LOW	1	0.00460829	FUSION	0	0	MISSENSE, INFRAME, TRUNCATING MUTATIONS (PUTATIVE DRIVER)	0	0
PFKM	ALL	11	0.0506912	AMPLIFICATION	1	0.00460829	DEEP DELETION	0	0	mRNA HIGH	10	0.0460829	mRNA LOW	0	0	FUSION	0	0	MISSENSE, INFRAME, TRUNCATING MUTATIONS (PUTATIVE DRIVER)	0	0
PFKP	ALL	10	0.0460829	AMPLIFICATION	0	0	DEEP DELETION	1	0.00460829	mRNA HIGH	9	0.0414747	mRNA LOW	0	0	FUSION	0	0	MISSENSE, INFRAME, TRUNCATING MUTATIONS (PUTATIVE DRIVER)	0	0
PGF	ALL	12	0.0552995	AMPLIFICATION	2	0.00921659	DEEP DELETION	0	0	mRNA HIGH	10	0.0460829	mRNA LOW	0	0	FUSION	0	0	MISSENSE, INFRAME, TRUNCATING MUTATIONS (PUTATIVE DRIVER)	0	0
PGK1	ALL	12	0.0552995	AMPLIFICATION	1	0.00460829	DEEP DELETION	0	0	mRNA HIGH	11	0.0506912	mRNA LOW	0	0	FUSION	0	0	MISSENSE, INFRAME, TRUNCATING MUTATIONS (PUTATIVE DRIVER)	0	0
PGK2	ALL	10	0.0460829	AMPLIFICATION	1	0.00460829	DEEP DELETION	1	0.00460829	mRNA HIGH	8	0.0368664	mRNA LOW	0	0	FUSION	0	0	MISSENSE, INFRAME, TRUNCATING MUTATIONS (PUTATIVE DRIVER)	0	0
PIK3CA	ALL	176	0.81106	AMPLIFICATION	30	0.138249	DEEP DELETION	0	0	mRNA HIGH	81	0.373272	mRNA LOW	3	0.0138249	FUSION	0	0	MISSENSE, INFRAME, TRUNCATING MUTATIONS (PUTATIVE DRIVER)	62	0.285714
PIK3CB	ALL	56	0.258065	AMPLIFICATION	14	0.0645161	DEEP DELETION	0	0	mRNA HIGH	42	0.193548	mRNA LOW	0	0	FUSION	0	0	MISSENSE, INFRAME, TRUNCATING MUTATIONS (PUTATIVE DRIVER)	0	0
PIK3CD	ALL	9	0.0414747	AMPLIFICATION	0	0	DEEP DELETION	1	0.00460829	mRNA HIGH	8	0.0368664	mRNA LOW	0	0	FUSION	0	0	MISSENSE, INFRAME, TRUNCATING MUTATIONS (PUTATIVE DRIVER)	0	0
PIK3CG	ALL	6	0.0276498	AMPLIFICATION	0	0	DEEP DELETION	0	0	mRNA HIGH	6	0.0276498	mRNA LOW	0	0	FUSION	0	0	MISSENSE, INFRAME, TRUNCATING MUTATIONS (PUTATIVE DRIVER)	0	0
PIK3R1	ALL	8	0.0368664	AMPLIFICATION	0	0	DEEP DELETION	0	0	mRNA HIGH	4	0.0184332	mRNA LOW	0	0	FUSION	0	0	MISSENSE, INFRAME, TRUNCATING MUTATIONS (PUTATIVE DRIVER)	4	0.0184332
PIK3R2	ALL	14	0.0645161	AMPLIFICATION	0	0	DEEP DELETION	1	0.00460829	mRNA HIGH	10	0.0460829	mRNA LOW	2	0.00921659	FUSION	0	0	MISSENSE, INFRAME, TRUNCATING MUTATIONS (PUTATIVE DRIVER)	1	0.00460829
PIK3R3	ALL	20	0.0921659	AMPLIFICATION	0	0	DEEP DELETION	0	0	mRNA HIGH	19	0.0875576	mRNA LOW	0	0	FUSION	1	0.00460829	MISSENSE, INFRAME, TRUNCATING MUTATIONS (PUTATIVE DRIVER)	0	0
PKLR	ALL	12	0.0552995	AMPLIFICATION	4	0.0184332	DEEP DELETION	0	0	mRNA HIGH	8	0.0368664	mRNA LOW	0	0	FUSION	0	0	MISSENSE, INFRAME, TRUNCATING MUTATIONS (PUTATIVE DRIVER)	0	0
PLCG1	ALL	16	0.0737327	AMPLIFICATION	1	0.00460829	DEEP DELETION	1	0.00460829	mRNA HIGH	14	0.0645161	mRNA LOW	0	0	FUSION	0	0	MISSENSE, INFRAME, TRUNCATING MUTATIONS (PUTATIVE DRIVER)	0	0
PLCG2	ALL	7	0.0322581	AMPLIFICATION	0	0	DEEP DELETION	2	0.00921659	mRNA HIGH	4	0.0184332	mRNA LOW	0	0	FUSION	1	0.00460829	MISSENSE, INFRAME, TRUNCATING MUTATIONS (PUTATIVE DRIVER)	0	0
PLOD1	ALL	13	0.0599078	AMPLIFICATION	0	0	DEEP DELETION	1	0.00460829	mRNA HIGH	12	0.0552995	mRNA LOW	0	0	FUSION	0	0	MISSENSE, INFRAME, TRUNCATING MUTATIONS (PUTATIVE DRIVER)	0	0
PLOD2	ALL	41	0.18894	AMPLIFICATION	15	0.0691244	DEEP DELETION	0	0	mRNA HIGH	26	0.119816	mRNA LOW	0	0	FUSION	0	0	MISSENSE, INFRAME, TRUNCATING MUTATIONS (PUTATIVE DRIVER)	0	0
PMAIP1	ALL	10	0.0460829	AMPLIFICATION	0	0	DEEP DELETION	0	0	mRNA HIGH	10	0.0460829	mRNA LOW	0	0	FUSION	0	0	MISSENSE, INFRAME, TRUNCATING MUTATIONS (PUTATIVE DRIVER)	0	0
PML	ALL	16	0.0737327	AMPLIFICATION	0	0	DEEP DELETION	0	0	mRNA HIGH	16	0.0737327	mRNA LOW	0	0	FUSION	0	0	MISSENSE, INFRAME, TRUNCATING MUTATIONS (PUTATIVE DRIVER)	0	0
POLR2A	ALL	10	0.0460829	AMPLIFICATION	0	0	DEEP DELETION	3	0.0138249	mRNA HIGH	6	0.0276498	mRNA LOW	1	0.00460829	FUSION	0	0	MISSENSE, INFRAME, TRUNCATING MUTATIONS (PUTATIVE DRIVER)	0	0
PPARA	ALL	16	0.0737327	AMPLIFICATION	2	0.00921659	DEEP DELETION	2	0.00921659	mRNA HIGH	11	0.0506912	mRNA LOW	1	0.00460829	FUSION	0	0	MISSENSE, INFRAME, TRUNCATING MUTATIONS (PUTATIVE DRIVER)	0	0
PRKAA1	ALL	48	0.221198	AMPLIFICATION	11	0.0506912	DEEP DELETION	0	0	mRNA HIGH	37	0.170507	mRNA LOW	0	0	FUSION	0	0	MISSENSE, INFRAME, TRUNCATING MUTATIONS (PUTATIVE DRIVER)	0	0
PRKAA2	ALL	16	0.0737327	AMPLIFICATION	1	0.00460829	DEEP DELETION	0	0	mRNA HIGH	15	0.0691244	mRNA LOW	0	0	FUSION	0	0	MISSENSE, INFRAME, TRUNCATING MUTATIONS (PUTATIVE DRIVER)	0	0
PRKCA	ALL	13	0.0599078	AMPLIFICATION	3	0.0138249	DEEP DELETION	0	0	mRNA HIGH	10	0.0460829	mRNA LOW	0	0	FUSION	0	0	MISSENSE, INFRAME, TRUNCATING MUTATIONS (PUTATIVE DRIVER)	0	0
PRKCB	ALL	8	0.0368664	AMPLIFICATION	0	0	DEEP DELETION	0	0	mRNA HIGH	8	0.0368664	mRNA LOW	0	0	FUSION	0	0	MISSENSE, INFRAME, TRUNCATING MUTATIONS (PUTATIVE DRIVER)	0	0
PRKCG	ALL	10	0.0460829	AMPLIFICATION	3	0.0138249	DEEP DELETION	0	0	mRNA HIGH	7	0.0322581	mRNA LOW	0	0	FUSION	0	0	MISSENSE, INFRAME, TRUNCATING MUTATIONS (PUTATIVE DRIVER)	0	0
PSEN2	ALL	13	0.0599078	AMPLIFICATION	1	0.00460829	DEEP DELETION	1	0.00460829	mRNA HIGH	11	0.0506912	mRNA LOW	0	0	FUSION	0	0	MISSENSE, INFRAME, TRUNCATING MUTATIONS (PUTATIVE DRIVER)	0	0
PSMC3	ALL	16	0.0737327	AMPLIFICATION	1	0.00460829	DEEP DELETION	1	0.00460829	mRNA HIGH	14	0.0645161	mRNA LOW	0	0	FUSION	0	0	MISSENSE, INFRAME, TRUNCATING MUTATIONS (PUTATIVE DRIVER)	0	0
RBX1	ALL	17	0.078341	AMPLIFICATION	2	0.00921659	DEEP DELETION	0	0	mRNA HIGH	15	0.0691244	mRNA LOW	0	0	FUSION	0	0	MISSENSE, INFRAME, TRUNCATING MUTATIONS (PUTATIVE DRIVER)	0	0
RELA	ALL	24	0.110599	AMPLIFICATION	2	0.00921659	DEEP DELETION	0	0	mRNA HIGH	12	0.0552995	mRNA LOW	10	0.0460829	FUSION	0	0	MISSENSE, INFRAME, TRUNCATING MUTATIONS (PUTATIVE DRIVER)	0	0
RPS6	ALL	11	0.0506912	AMPLIFICATION	0	0	DEEP DELETION	0	0	mRNA HIGH	11	0.0506912	mRNA LOW	0	0	FUSION	0	0	MISSENSE, INFRAME, TRUNCATING MUTATIONS (PUTATIVE DRIVER)	0	0
RPS6KB1	ALL	17	0.078341	AMPLIFICATION	0	0	DEEP DELETION	0	0	mRNA HIGH	14	0.0645161	mRNA LOW	3	0.0138249	FUSION	0	0	MISSENSE, INFRAME, TRUNCATING MUTATIONS (PUTATIVE DRIVER)	0	0
RPS6KB2	ALL	19	0.0875576	AMPLIFICATION	3	0.0138249	DEEP DELETION	0	0	mRNA HIGH	15	0.0691244	mRNA LOW	1	0.00460829	FUSION	0	0	MISSENSE, INFRAME, TRUNCATING MUTATIONS (PUTATIVE DRIVER)	0	0
RYR1	ALL	26	0.119816	AMPLIFICATION	5	0.0230415	DEEP DELETION	0	0	mRNA HIGH	21	0.0967742	mRNA LOW	0	0	FUSION	0	0	MISSENSE, INFRAME, TRUNCATING MUTATIONS (PUTATIVE DRIVER)	0	0
SATB1	ALL	9	0.0414747	AMPLIFICATION	0	0	DEEP DELETION	0	0	mRNA HIGH	9	0.0414747	mRNA LOW	0	0	FUSION	0	0	MISSENSE, INFRAME, TRUNCATING MUTATIONS (PUTATIVE DRIVER)	0	0
SCNN1B	ALL	18	0.0829493	AMPLIFICATION	0	0	DEEP DELETION	0	0	mRNA HIGH	18	0.0829493	mRNA LOW	0	0	FUSION	0	0	MISSENSE, INFRAME, TRUNCATING MUTATIONS (PUTATIVE DRIVER)	0	0
SERPINE1	ALL	14	0.0645161	AMPLIFICATION	1	0.00460829	DEEP DELETION	0	0	mRNA HIGH	13	0.0599078	mRNA LOW	0	0	FUSION	0	0	MISSENSE, INFRAME, TRUNCATING MUTATIONS (PUTATIVE DRIVER)	0	0
SFRP1	ALL	10	0.0460829	AMPLIFICATION	3	0.0138249	DEEP DELETION	1	0.00460829	mRNA HIGH	6	0.0276498	mRNA LOW	0	0	FUSION	0	0	MISSENSE, INFRAME, TRUNCATING MUTATIONS (PUTATIVE DRIVER)	0	0
SHC1	ALL	22	0.101382	AMPLIFICATION	5	0.0230415	DEEP DELETION	0	0	mRNA HIGH	17	0.078341	mRNA LOW	0	0	FUSION	0	0	MISSENSE, INFRAME, TRUNCATING MUTATIONS (PUTATIVE DRIVER)	0	0
SLC29A1	ALL	15	0.0691244	AMPLIFICATION	2	0.00921659	DEEP DELETION	0	0	mRNA HIGH	13	0.0599078	mRNA LOW	0	0	FUSION	0	0	MISSENSE, INFRAME, TRUNCATING MUTATIONS (PUTATIVE DRIVER)	0	0
SLC2A1	ALL	5	0.0230415	AMPLIFICATION	0	0	DEEP DELETION	0	0	mRNA HIGH	4	0.0184332	mRNA LOW	0	0	FUSION	1	0.00460829	MISSENSE, INFRAME, TRUNCATING MUTATIONS (PUTATIVE DRIVER)	0	0
SLC8A1	ALL	8	0.0368664	AMPLIFICATION	1	0.00460829	DEEP DELETION	0	0	mRNA HIGH	7	0.0322581	mRNA LOW	0	0	FUSION	0	0	MISSENSE, INFRAME, TRUNCATING MUTATIONS (PUTATIVE DRIVER)	0	0
SMAD3	ALL	12	0.0552995	AMPLIFICATION	0	0	DEEP DELETION	0	0	mRNA HIGH	10	0.0460829	mRNA LOW	0	0	FUSION	0	0	MISSENSE, INFRAME, TRUNCATING MUTATIONS (PUTATIVE DRIVER)	2	0.00921659
SMAD4	ALL	36	0.165899	AMPLIFICATION	0	0	DEEP DELETION	4	0.0184332	mRNA HIGH	9	0.0414747	mRNA LOW	14	0.0645161	FUSION	0	0	MISSENSE, INFRAME, TRUNCATING MUTATIONS (PUTATIVE DRIVER)	9	0.0414747
SNAI3	ALL	4	0.0184332	AMPLIFICATION	0	0	DEEP DELETION	3	0.0138249	mRNA HIGH	1	0.00460829	mRNA LOW	0	0	FUSION	0	0	MISSENSE, INFRAME, TRUNCATING MUTATIONS (PUTATIVE DRIVER)	0	0
SOD2	ALL	14	0.0645161	AMPLIFICATION	0	0	DEEP DELETION	1	0.00460829	mRNA HIGH	13	0.0599078	mRNA LOW	0	0	FUSION	0	0	MISSENSE, INFRAME, TRUNCATING MUTATIONS (PUTATIVE DRIVER)	0	0
SOD3	ALL	5	0.0230415	AMPLIFICATION	0	0	DEEP DELETION	1	0.00460829	mRNA HIGH	4	0.0184332	mRNA LOW	0	0	FUSION	0	0	MISSENSE, INFRAME, TRUNCATING MUTATIONS (PUTATIVE DRIVER)	0	0
SPRY2	ALL	9	0.0414747	AMPLIFICATION	1	0.00460829	DEEP DELETION	1	0.00460829	mRNA HIGH	7	0.0322581	mRNA LOW	0	0	FUSION	0	0	MISSENSE, INFRAME, TRUNCATING MUTATIONS (PUTATIVE DRIVER)	0	0
STAT3	ALL	19	0.0875576	AMPLIFICATION	0	0	DEEP DELETION	1	0.00460829	mRNA HIGH	14	0.0645161	mRNA LOW	1	0.00460829	FUSION	1	0.00460829	MISSENSE, INFRAME, TRUNCATING MUTATIONS (PUTATIVE DRIVER)	2	0.00921659
STAT5B	ALL	15	0.0691244	AMPLIFICATION	0	0	DEEP DELETION	1	0.00460829	mRNA HIGH	13	0.0599078	mRNA LOW	1	0.00460829	FUSION	0	0	MISSENSE, INFRAME, TRUNCATING MUTATIONS (PUTATIVE DRIVER)	0	0
STC1	ALL	8	0.0368664	AMPLIFICATION	0	0	DEEP DELETION	2	0.00921659	mRNA HIGH	6	0.0276498	mRNA LOW	0	0	FUSION	0	0	MISSENSE, INFRAME, TRUNCATING MUTATIONS (PUTATIVE DRIVER)	0	0
STC2	ALL	6	0.0276498	AMPLIFICATION	1	0.00460829	DEEP DELETION	0	0	mRNA HIGH	5	0.0230415	mRNA LOW	0	0	FUSION	0	0	MISSENSE, INFRAME, TRUNCATING MUTATIONS (PUTATIVE DRIVER)	0	0
TEK	ALL	8	0.0368664	AMPLIFICATION	0	0	DEEP DELETION	0	0	mRNA HIGH	8	0.0368664	mRNA LOW	0	0	FUSION	0	0	MISSENSE, INFRAME, TRUNCATING MUTATIONS (PUTATIVE DRIVER)	0	0
TF	ALL	15	0.0691244	AMPLIFICATION	13	0.0599078	DEEP DELETION	0	0	mRNA HIGH	2	0.00921659	mRNA LOW	0	0	FUSION	0	0	MISSENSE, INFRAME, TRUNCATING MUTATIONS (PUTATIVE DRIVER)	0	0
TFRC	ALL	52	0.239631	AMPLIFICATION	29	0.133641	DEEP DELETION	0	0	mRNA HIGH	23	0.105991	mRNA LOW	0	0	FUSION	0	0	MISSENSE, INFRAME, TRUNCATING MUTATIONS (PUTATIVE DRIVER)	0	0
TGFA	ALL	15	0.0691244	AMPLIFICATION	0	0	DEEP DELETION	0	0	mRNA HIGH	15	0.0691244	mRNA LOW	0	0	FUSION	0	0	MISSENSE, INFRAME, TRUNCATING MUTATIONS (PUTATIVE DRIVER)	0	0
TGFB1	ALL	11	0.0506912	AMPLIFICATION	2	0.00921659	DEEP DELETION	0	0	mRNA HIGH	9	0.0414747	mRNA LOW	0	0	FUSION	0	0	MISSENSE, INFRAME, TRUNCATING MUTATIONS (PUTATIVE DRIVER)	0	0
TGFB2	ALL	15	0.0691244	AMPLIFICATION	1	0.00460829	DEEP DELETION	1	0.00460829	mRNA HIGH	13	0.0599078	mRNA LOW	0	0	FUSION	0	0	MISSENSE, INFRAME, TRUNCATING MUTATIONS (PUTATIVE DRIVER)	0	0
TGFB3	ALL	18	0.0829493	AMPLIFICATION	3	0.0138249	DEEP DELETION	1	0.00460829	mRNA HIGH	14	0.0645161	mRNA LOW	0	0	FUSION	0	0	MISSENSE, INFRAME, TRUNCATING MUTATIONS (PUTATIVE DRIVER)	0	0
TGFBR1	ALL	7	0.0322581	AMPLIFICATION	0	0	DEEP DELETION	0	0	mRNA HIGH	7	0.0322581	mRNA LOW	0	0	FUSION	0	0	MISSENSE, INFRAME, TRUNCATING MUTATIONS (PUTATIVE DRIVER)	0	0
TH	ALL	4	0.0184332	AMPLIFICATION	0	0	DEEP DELETION	0	0	mRNA HIGH	4	0.0184332	mRNA LOW	0	0	FUSION	0	0	MISSENSE, INFRAME, TRUNCATING MUTATIONS (PUTATIVE DRIVER)	0	0
THBS1	ALL	13	0.0599078	AMPLIFICATION	0	0	DEEP DELETION	1	0.00460829	mRNA HIGH	12	0.0552995	mRNA LOW	0	0	FUSION	0	0	MISSENSE, INFRAME, TRUNCATING MUTATIONS (PUTATIVE DRIVER)	0	0
TIMP1	ALL	15	0.0691244	AMPLIFICATION	3	0.0138249	DEEP DELETION	1	0.00460829	mRNA HIGH	11	0.0506912	mRNA LOW	0	0	FUSION	0	0	MISSENSE, INFRAME, TRUNCATING MUTATIONS (PUTATIVE DRIVER)	0	0
TLR4	ALL	14	0.0645161	AMPLIFICATION	1	0.00460829	DEEP DELETION	0	0	mRNA HIGH	13	0.0599078	mRNA LOW	0	0	FUSION	0	0	MISSENSE, INFRAME, TRUNCATING MUTATIONS (PUTATIVE DRIVER)	0	0
TNC	ALL	13	0.0599078	AMPLIFICATION	0	0	DEEP DELETION	0	0	mRNA HIGH	12	0.0552995	mRNA LOW	0	0	FUSION	1	0.00460829	MISSENSE, INFRAME, TRUNCATING MUTATIONS (PUTATIVE DRIVER)	0	0
TNF	ALL	8	0.0368664	AMPLIFICATION	4	0.0184332	DEEP DELETION	0	0	mRNA HIGH	4	0.0184332	mRNA LOW	0	0	FUSION	0	0	MISSENSE, INFRAME, TRUNCATING MUTATIONS (PUTATIVE DRIVER)	0	0
TP53	ALL	31	0.142857	AMPLIFICATION	0	0	DEEP DELETION	3	0.0138249	mRNA HIGH	6	0.0276498	mRNA LOW	6	0.0276498	FUSION	0	0	MISSENSE, INFRAME, TRUNCATING MUTATIONS (PUTATIVE DRIVER)	16	0.0737327
TSC2	ALL	26	0.119816	AMPLIFICATION	1	0.00460829	DEEP DELETION	0	0	mRNA HIGH	20	0.0921659	mRNA LOW	1	0.00460829	FUSION	0	0	MISSENSE, INFRAME, TRUNCATING MUTATIONS (PUTATIVE DRIVER)	4	0.0184332
UBE2B	ALL	9	0.0414747	AMPLIFICATION	0	0	DEEP DELETION	0	0	mRNA HIGH	9	0.0414747	mRNA LOW	0	0	FUSION	0	0	MISSENSE, INFRAME, TRUNCATING MUTATIONS (PUTATIVE DRIVER)	0	0
UCP2	ALL	10	0.0460829	AMPLIFICATION	1	0.00460829	DEEP DELETION	0	0	mRNA HIGH	9	0.0414747	mRNA LOW	0	0	FUSION	0	0	MISSENSE, INFRAME, TRUNCATING MUTATIONS (PUTATIVE DRIVER)	0	0
USF1	ALL	23	0.105991	AMPLIFICATION	3	0.0138249	DEEP DELETION	0	0	mRNA HIGH	20	0.0921659	mRNA LOW	0	0	FUSION	0	0	MISSENSE, INFRAME, TRUNCATING MUTATIONS (PUTATIVE DRIVER)	0	0
VCAM1	ALL	5	0.0230415	AMPLIFICATION	0	0	DEEP DELETION	1	0.00460829	mRNA HIGH	4	0.0184332	mRNA LOW	0	0	FUSION	0	0	MISSENSE, INFRAME, TRUNCATING MUTATIONS (PUTATIVE DRIVER)	0	0
VEGFA	ALL	9	0.0414747	AMPLIFICATION	2	0.00921659	DEEP DELETION	0	0	mRNA HIGH	7	0.0322581	mRNA LOW	0	0	FUSION	0	0	MISSENSE, INFRAME, TRUNCATING MUTATIONS (PUTATIVE DRIVER)	0	0
VEGFC	ALL	12	0.0552995	AMPLIFICATION	0	0	DEEP DELETION	2	0.00921659	mRNA HIGH	10	0.0460829	mRNA LOW	0	0	FUSION	0	0	MISSENSE, INFRAME, TRUNCATING MUTATIONS (PUTATIVE DRIVER)	0	0
VHL	ALL	5	0.0230415	AMPLIFICATION	0	0	DEEP DELETION	0	0	mRNA HIGH	5	0.0230415	mRNA LOW	0	0	FUSION	0	0	MISSENSE, INFRAME, TRUNCATING MUTATIONS (PUTATIVE DRIVER)	0	0
VLDLR	ALL	17	0.078341	AMPLIFICATION	1	0.00460829	DEEP DELETION	2	0.00921659	mRNA HIGH	14	0.0645161	mRNA LOW	0	0	FUSION	0	0	MISSENSE, INFRAME, TRUNCATING MUTATIONS (PUTATIVE DRIVER)	0	0

## Sheet: ST_5
Supplementary Table 5. Frequency of genetic alterations in the hypoxia-related genes of 521 individuals with colorectal adenocarcinma from the TCGA Pan-Cancer Atlas project (TCGA-CRC-PanCancer).
GENE	TYPE	TOTAL	FREQUENCY	TYPE	TOTAL	FREQUENCY	TYPE	TOTAL	FREQUENCY	TYPE	TOTAL	FREQUENCY	TYPE	TOTAL	FREQUENCY	TYPE	TOTAL	FREQUENCY	TYPE	TOTAL	FREQUENCY
ACTN4	ALL	51	0.0978887	AMPLIFICATION	4	0.00767754	DEEP DELETION	0	0	mRNA HIGH	43	0.0825336	mRNA LOW	4	0.00767754	FUSION	0	0	MISSENSE, INFRAME, TRUNCATING MUTATIONS (PUTATIVE DRIVER)	0	0
ADA	ALL	76	0.145873	AMPLIFICATION	38	0.0729367	DEEP DELETION	0	0	mRNA HIGH	38	0.0729367	mRNA LOW	0	0	FUSION	0	0	MISSENSE, INFRAME, TRUNCATING MUTATIONS (PUTATIVE DRIVER)	0	0
ADAM8	ALL	31	0.059501	AMPLIFICATION	1	0.00191939	DEEP DELETION	1	0.00191939	mRNA HIGH	29	0.0556622	mRNA LOW	0	0	FUSION	0	0	MISSENSE, INFRAME, TRUNCATING MUTATIONS (PUTATIVE DRIVER)	0	0
ADM	ALL	22	0.0422265	AMPLIFICATION	0	0	DEEP DELETION	1	0.00191939	mRNA HIGH	21	0.0403071	mRNA LOW	0	0	FUSION	0	0	MISSENSE, INFRAME, TRUNCATING MUTATIONS (PUTATIVE DRIVER)	0	0
ADORA1	ALL	27	0.0518234	AMPLIFICATION	4	0.00767754	DEEP DELETION	0	0	mRNA HIGH	23	0.0441459	mRNA LOW	0	0	FUSION	0	0	MISSENSE, INFRAME, TRUNCATING MUTATIONS (PUTATIVE DRIVER)	0	0
ADRA1B	ALL	14	0.0268714	AMPLIFICATION	0	0	DEEP DELETION	0	0	mRNA HIGH	14	0.0268714	mRNA LOW	0	0	FUSION	0	0	MISSENSE, INFRAME, TRUNCATING MUTATIONS (PUTATIVE DRIVER)	0	0
AKT1	ALL	52	0.0998081	AMPLIFICATION	1	0.00191939	DEEP DELETION	0	0	mRNA HIGH	23	0.0441459	mRNA LOW	23	0.0441459	FUSION	0	0	MISSENSE, INFRAME, TRUNCATING MUTATIONS (PUTATIVE DRIVER)	5	0.00959693
AKT2	ALL	36	0.0690979	AMPLIFICATION	4	0.00767754	DEEP DELETION	0	0	mRNA HIGH	31	0.059501	mRNA LOW	1	0.00191939	FUSION	0	0	MISSENSE, INFRAME, TRUNCATING MUTATIONS (PUTATIVE DRIVER)	0	0
AKT3	ALL	40	0.0767754	AMPLIFICATION	3	0.00575816	DEEP DELETION	2	0.00383877	mRNA HIGH	35	0.0671785	mRNA LOW	0	0	FUSION	0	0	MISSENSE, INFRAME, TRUNCATING MUTATIONS (PUTATIVE DRIVER)	0	0
ALAS2	ALL	14	0.0268714	AMPLIFICATION	2	0.00383877	DEEP DELETION	1	0.00191939	mRNA HIGH	11	0.0211132	mRNA LOW	0	0	FUSION	0	0	MISSENSE, INFRAME, TRUNCATING MUTATIONS (PUTATIVE DRIVER)	0	0
ALDOA	ALL	36	0.0690979	AMPLIFICATION	2	0.00383877	DEEP DELETION	0	0	mRNA HIGH	33	0.0633397	mRNA LOW	1	0.00191939	FUSION	0	0	MISSENSE, INFRAME, TRUNCATING MUTATIONS (PUTATIVE DRIVER)	0	0
ALDOB	ALL	25	0.0479846	AMPLIFICATION	1	0.00191939	DEEP DELETION	0	0	mRNA HIGH	24	0.0460653	mRNA LOW	0	0	FUSION	0	0	MISSENSE, INFRAME, TRUNCATING MUTATIONS (PUTATIVE DRIVER)	0	0
ALDOC	ALL	29	0.0556622	AMPLIFICATION	5	0.00959693	DEEP DELETION	0	0	mRNA HIGH	24	0.0460653	mRNA LOW	0	0	FUSION	0	0	MISSENSE, INFRAME, TRUNCATING MUTATIONS (PUTATIVE DRIVER)	0	0
ANG	ALL	24	0.0460653	AMPLIFICATION	0	0	DEEP DELETION	0	0	mRNA HIGH	24	0.0460653	mRNA LOW	0	0	FUSION	0	0	MISSENSE, INFRAME, TRUNCATING MUTATIONS (PUTATIVE DRIVER)	0	0
ANGPT1	ALL	53	0.101727	AMPLIFICATION	12	0.0230326	DEEP DELETION	0	0	mRNA HIGH	41	0.0786948	mRNA LOW	0	0	FUSION	0	0	MISSENSE, INFRAME, TRUNCATING MUTATIONS (PUTATIVE DRIVER)	0	0
ANGPT2	ALL	42	0.0806142	AMPLIFICATION	2	0.00383877	DEEP DELETION	25	0.0479846	mRNA HIGH	15	0.0287908	mRNA LOW	0	0	FUSION	0	0	MISSENSE, INFRAME, TRUNCATING MUTATIONS (PUTATIVE DRIVER)	0	0
ANGPT4	ALL	13	0.024952	AMPLIFICATION	3	0.00575816	DEEP DELETION	1	0.00191939	mRNA HIGH	9	0.0172745	mRNA LOW	0	0	FUSION	0	0	MISSENSE, INFRAME, TRUNCATING MUTATIONS (PUTATIVE DRIVER)	0	0
ANGPTL4	ALL	21	0.0403071	AMPLIFICATION	0	0	DEEP DELETION	3	0.00575816	mRNA HIGH	18	0.0345489	mRNA LOW	0	0	FUSION	0	0	MISSENSE, INFRAME, TRUNCATING MUTATIONS (PUTATIVE DRIVER)	0	0
AQP1	ALL	40	0.0767754	AMPLIFICATION	1	0.00191939	DEEP DELETION	0	0	mRNA HIGH	39	0.074856	mRNA LOW	0	0	FUSION	0	0	MISSENSE, INFRAME, TRUNCATING MUTATIONS (PUTATIVE DRIVER)	0	0
ARG2	ALL	25	0.0479846	AMPLIFICATION	0	0	DEEP DELETION	0	0	mRNA HIGH	24	0.0460653	mRNA LOW	0	0	FUSION	1	0.00191939	MISSENSE, INFRAME, TRUNCATING MUTATIONS (PUTATIVE DRIVER)	0	0
ARNT	ALL	54	0.103647	AMPLIFICATION	4	0.00767754	DEEP DELETION	0	0	mRNA HIGH	44	0.084453	mRNA LOW	6	0.0115163	FUSION	0	0	MISSENSE, INFRAME, TRUNCATING MUTATIONS (PUTATIVE DRIVER)	0	0
ARNT2	ALL	18	0.0345489	AMPLIFICATION	1	0.00191939	DEEP DELETION	0	0	mRNA HIGH	17	0.0326296	mRNA LOW	0	0	FUSION	0	0	MISSENSE, INFRAME, TRUNCATING MUTATIONS (PUTATIVE DRIVER)	0	0
ASCL2	ALL	30	0.0575816	AMPLIFICATION	2	0.00383877	DEEP DELETION	1	0.00191939	mRNA HIGH	27	0.0518234	mRNA LOW	0	0	FUSION	0	0	MISSENSE, INFRAME, TRUNCATING MUTATIONS (PUTATIVE DRIVER)	0	0
ATP1A1	ALL	21	0.0403071	AMPLIFICATION	0	0	DEEP DELETION	2	0.00383877	mRNA HIGH	19	0.0364683	mRNA LOW	0	0	FUSION	0	0	MISSENSE, INFRAME, TRUNCATING MUTATIONS (PUTATIVE DRIVER)	0	0
ATP1A2	ALL	26	0.049904	AMPLIFICATION	3	0.00575816	DEEP DELETION	0	0	mRNA HIGH	23	0.0441459	mRNA LOW	0	0	FUSION	0	0	MISSENSE, INFRAME, TRUNCATING MUTATIONS (PUTATIVE DRIVER)	0	0
ATP1B1	ALL	38	0.0729367	AMPLIFICATION	5	0.00959693	DEEP DELETION	0	0	mRNA HIGH	33	0.0633397	mRNA LOW	0	0	FUSION	0	0	MISSENSE, INFRAME, TRUNCATING MUTATIONS (PUTATIVE DRIVER)	0	0
BACH1	ALL	24	0.0460653	AMPLIFICATION	0	0	DEEP DELETION	0	0	mRNA HIGH	12	0.0230326	mRNA LOW	12	0.0230326	FUSION	0	0	MISSENSE, INFRAME, TRUNCATING MUTATIONS (PUTATIVE DRIVER)	0	0
BAD	ALL	21	0.0403071	AMPLIFICATION	0	0	DEEP DELETION	1	0.00191939	mRNA HIGH	18	0.0345489	mRNA LOW	2	0.00383877	FUSION	0	0	MISSENSE, INFRAME, TRUNCATING MUTATIONS (PUTATIVE DRIVER)	0	0
BBC3	ALL	29	0.0556622	AMPLIFICATION	0	0	DEEP DELETION	0	0	mRNA HIGH	27	0.0518234	mRNA LOW	0	0	FUSION	0	0	MISSENSE, INFRAME, TRUNCATING MUTATIONS (PUTATIVE DRIVER)	2	0.00383877
BCL2	ALL	19	0.0364683	AMPLIFICATION	0	0	DEEP DELETION	10	0.0191939	mRNA HIGH	9	0.0172745	mRNA LOW	0	0	FUSION	0	0	MISSENSE, INFRAME, TRUNCATING MUTATIONS (PUTATIVE DRIVER)	0	0
BNIP3	ALL	29	0.0556622	AMPLIFICATION	1	0.00191939	DEEP DELETION	1	0.00191939	mRNA HIGH	27	0.0518234	mRNA LOW	0	0	FUSION	0	0	MISSENSE, INFRAME, TRUNCATING MUTATIONS (PUTATIVE DRIVER)	0	0
CAMK2A	ALL	11	0.0211132	AMPLIFICATION	1	0.00191939	DEEP DELETION	1	0.00191939	mRNA HIGH	9	0.0172745	mRNA LOW	0	0	FUSION	0	0	MISSENSE, INFRAME, TRUNCATING MUTATIONS (PUTATIVE DRIVER)	0	0
CAMK2B	ALL	19	0.0364683	AMPLIFICATION	1	0.00191939	DEEP DELETION	0	0	mRNA HIGH	18	0.0345489	mRNA LOW	0	0	FUSION	0	0	MISSENSE, INFRAME, TRUNCATING MUTATIONS (PUTATIVE DRIVER)	0	0
CAMK2D	ALL	24	0.0460653	AMPLIFICATION	0	0	DEEP DELETION	1	0.00191939	mRNA HIGH	19	0.0364683	mRNA LOW	3	0.00575816	FUSION	1	0.00191939	MISSENSE, INFRAME, TRUNCATING MUTATIONS (PUTATIVE DRIVER)	0	0
CAMK2G	ALL	37	0.0710173	AMPLIFICATION	4	0.00767754	DEEP DELETION	0	0	mRNA HIGH	27	0.0518234	mRNA LOW	6	0.0115163	FUSION	0	0	MISSENSE, INFRAME, TRUNCATING MUTATIONS (PUTATIVE DRIVER)	0	0
CASR	ALL	9	0.0172745	AMPLIFICATION	0	0	DEEP DELETION	0	0	mRNA HIGH	9	0.0172745	mRNA LOW	0	0	FUSION	0	0	MISSENSE, INFRAME, TRUNCATING MUTATIONS (PUTATIVE DRIVER)	0	0
CAV1	ALL	14	0.0268714	AMPLIFICATION	0	0	DEEP DELETION	1	0.00191939	mRNA HIGH	13	0.024952	mRNA LOW	0	0	FUSION	0	0	MISSENSE, INFRAME, TRUNCATING MUTATIONS (PUTATIVE DRIVER)	0	0
CCL2	ALL	38	0.0729367	AMPLIFICATION	7	0.0134357	DEEP DELETION	1	0.00191939	mRNA HIGH	30	0.0575816	mRNA LOW	0	0	FUSION	0	0	MISSENSE, INFRAME, TRUNCATING MUTATIONS (PUTATIVE DRIVER)	0	0
CD24	ALL	0	0	AMPLIFICATION	0	0	DEEP DELETION	0	0	mRNA HIGH	0	0	mRNA LOW	0	0	FUSION	0	0	MISSENSE, INFRAME, TRUNCATING MUTATIONS (PUTATIVE DRIVER)	0	0
CDH1	ALL	59	0.113244	AMPLIFICATION	0	0	DEEP DELETION	1	0.00191939	mRNA HIGH	37	0.0710173	mRNA LOW	11	0.0211132	FUSION	0	0	MISSENSE, INFRAME, TRUNCATING MUTATIONS (PUTATIVE DRIVER)	10	0.0191939
CDKN1A	ALL	25	0.0479846	AMPLIFICATION	1	0.00191939	DEEP DELETION	1	0.00191939	mRNA HIGH	22	0.0422265	mRNA LOW	0	0	FUSION	0	0	MISSENSE, INFRAME, TRUNCATING MUTATIONS (PUTATIVE DRIVER)	1	0.00191939
CDKN1B	ALL	36	0.0690979	AMPLIFICATION	0	0	DEEP DELETION	2	0.00383877	mRNA HIGH	28	0.0537428	mRNA LOW	1	0.00191939	FUSION	0	0	MISSENSE, INFRAME, TRUNCATING MUTATIONS (PUTATIVE DRIVER)	5	0.00959693
CHRNA7	ALL	25	0.0479846	AMPLIFICATION	0	0	DEEP DELETION	7	0.0134357	mRNA HIGH	18	0.0345489	mRNA LOW	0	0	FUSION	0	0	MISSENSE, INFRAME, TRUNCATING MUTATIONS (PUTATIVE DRIVER)	0	0
CHRNB2	ALL	12	0.0230326	AMPLIFICATION	3	0.00575816	DEEP DELETION	0	0	mRNA HIGH	9	0.0172745	mRNA LOW	0	0	FUSION	0	0	MISSENSE, INFRAME, TRUNCATING MUTATIONS (PUTATIVE DRIVER)	0	0
CIAO3	ALL	35	0.0671785	AMPLIFICATION	2	0.00383877	DEEP DELETION	2	0.00383877	mRNA HIGH	28	0.0537428	mRNA LOW	3	0.00575816	FUSION	0	0	MISSENSE, INFRAME, TRUNCATING MUTATIONS (PUTATIVE DRIVER)	0	0
CITED2	ALL	34	0.0652591	AMPLIFICATION	3	0.00575816	DEEP DELETION	0	0	mRNA HIGH	31	0.059501	mRNA LOW	0	0	FUSION	0	0	MISSENSE, INFRAME, TRUNCATING MUTATIONS (PUTATIVE DRIVER)	0	0
CLDN3	ALL	29	0.0556622	AMPLIFICATION	2	0.00383877	DEEP DELETION	0	0	mRNA HIGH	27	0.0518234	mRNA LOW	0	0	FUSION	0	0	MISSENSE, INFRAME, TRUNCATING MUTATIONS (PUTATIVE DRIVER)	0	0
COPS5	ALL	121	0.232246	AMPLIFICATION	8	0.0153551	DEEP DELETION	0	0	mRNA HIGH	111	0.213052	mRNA LOW	2	0.00383877	FUSION	0	0	MISSENSE, INFRAME, TRUNCATING MUTATIONS (PUTATIVE DRIVER)	0	0
CREBBP	ALL	54	0.103647	AMPLIFICATION	0	0	DEEP DELETION	0	0	mRNA HIGH	32	0.0614203	mRNA LOW	4	0.00767754	FUSION	0	0	MISSENSE, INFRAME, TRUNCATING MUTATIONS (PUTATIVE DRIVER)	18	0.0345489
CUL2	ALL	41	0.0786948	AMPLIFICATION	0	0	DEEP DELETION	0	0	mRNA HIGH	30	0.0575816	mRNA LOW	11	0.0211132	FUSION	0	0	MISSENSE, INFRAME, TRUNCATING MUTATIONS (PUTATIVE DRIVER)	0	0
CXCR4	ALL	27	0.0518234	AMPLIFICATION	0	0	DEEP DELETION	1	0.00191939	mRNA HIGH	25	0.0479846	mRNA LOW	0	0	FUSION	0	0	MISSENSE, INFRAME, TRUNCATING MUTATIONS (PUTATIVE DRIVER)	1	0.00191939
CYBB	ALL	27	0.0518234	AMPLIFICATION	2	0.00383877	DEEP DELETION	2	0.00383877	mRNA HIGH	23	0.0441459	mRNA LOW	0	0	FUSION	0	0	MISSENSE, INFRAME, TRUNCATING MUTATIONS (PUTATIVE DRIVER)	0	0
CYP1A1	ALL	6	0.0115163	AMPLIFICATION	0	0	DEEP DELETION	0	0	mRNA HIGH	6	0.0115163	mRNA LOW	0	0	FUSION	0	0	MISSENSE, INFRAME, TRUNCATING MUTATIONS (PUTATIVE DRIVER)	0	0
DDIT4	ALL	27	0.0518234	AMPLIFICATION	3	0.00575816	DEEP DELETION	0	0	mRNA HIGH	24	0.0460653	mRNA LOW	0	0	FUSION	0	0	MISSENSE, INFRAME, TRUNCATING MUTATIONS (PUTATIVE DRIVER)	0	0
DPP4	ALL	31	0.059501	AMPLIFICATION	0	0	DEEP DELETION	2	0.00383877	mRNA HIGH	29	0.0556622	mRNA LOW	0	0	FUSION	0	0	MISSENSE, INFRAME, TRUNCATING MUTATIONS (PUTATIVE DRIVER)	0	0
E2F1	ALL	130	0.24952	AMPLIFICATION	36	0.0690979	DEEP DELETION	0	0	mRNA HIGH	94	0.180422	mRNA LOW	0	0	FUSION	0	0	MISSENSE, INFRAME, TRUNCATING MUTATIONS (PUTATIVE DRIVER)	0	0
EDN1	ALL	32	0.0614203	AMPLIFICATION	1	0.00191939	DEEP DELETION	1	0.00191939	mRNA HIGH	30	0.0575816	mRNA LOW	0	0	FUSION	0	0	MISSENSE, INFRAME, TRUNCATING MUTATIONS (PUTATIVE DRIVER)	0	0
EDNRA	ALL	12	0.0230326	AMPLIFICATION	0	0	DEEP DELETION	0	0	mRNA HIGH	12	0.0230326	mRNA LOW	0	0	FUSION	0	0	MISSENSE, INFRAME, TRUNCATING MUTATIONS (PUTATIVE DRIVER)	0	0
EDNRB	ALL	33	0.0633397	AMPLIFICATION	6	0.0115163	DEEP DELETION	0	0	mRNA HIGH	27	0.0518234	mRNA LOW	0	0	FUSION	0	0	MISSENSE, INFRAME, TRUNCATING MUTATIONS (PUTATIVE DRIVER)	0	0
EGF	ALL	23	0.0441459	AMPLIFICATION	0	0	DEEP DELETION	0	0	mRNA HIGH	23	0.0441459	mRNA LOW	0	0	FUSION	0	0	MISSENSE, INFRAME, TRUNCATING MUTATIONS (PUTATIVE DRIVER)	0	0
EGFR	ALL	68	0.130518	AMPLIFICATION	3	0.00575816	DEEP DELETION	0	0	mRNA HIGH	61	0.117083	mRNA LOW	0	0	FUSION	0	0	MISSENSE, INFRAME, TRUNCATING MUTATIONS (PUTATIVE DRIVER)	4	0.00767754
EGLN1	ALL	37	0.0710173	AMPLIFICATION	3	0.00575816	DEEP DELETION	0	0	mRNA HIGH	30	0.0575816	mRNA LOW	4	0.00767754	FUSION	0	0	MISSENSE, INFRAME, TRUNCATING MUTATIONS (PUTATIVE DRIVER)	0	0
EGLN2	ALL	22	0.0422265	AMPLIFICATION	1	0.00191939	DEEP DELETION	0	0	mRNA HIGH	20	0.0383877	mRNA LOW	1	0.00191939	FUSION	0	0	MISSENSE, INFRAME, TRUNCATING MUTATIONS (PUTATIVE DRIVER)	0	0
EGLN3	ALL	19	0.0364683	AMPLIFICATION	0	0	DEEP DELETION	0	0	mRNA HIGH	19	0.0364683	mRNA LOW	0	0	FUSION	0	0	MISSENSE, INFRAME, TRUNCATING MUTATIONS (PUTATIVE DRIVER)	0	0
EIF4E	ALL	26	0.049904	AMPLIFICATION	0	0	DEEP DELETION	0	0	mRNA HIGH	19	0.0364683	mRNA LOW	7	0.0134357	FUSION	0	0	MISSENSE, INFRAME, TRUNCATING MUTATIONS (PUTATIVE DRIVER)	0	0
EIF4E1B	ALL	8	0.0153551	AMPLIFICATION	0	0	DEEP DELETION	0	0	mRNA HIGH	8	0.0153551	mRNA LOW	0	0	FUSION	0	0	MISSENSE, INFRAME, TRUNCATING MUTATIONS (PUTATIVE DRIVER)	0	0
EIF4E2	ALL	34	0.0652591	AMPLIFICATION	0	0	DEEP DELETION	1	0.00191939	mRNA HIGH	29	0.0556622	mRNA LOW	4	0.00767754	FUSION	0	0	MISSENSE, INFRAME, TRUNCATING MUTATIONS (PUTATIVE DRIVER)	0	0
EIF4EBP1	ALL	71	0.136276	AMPLIFICATION	13	0.024952	DEEP DELETION	5	0.00959693	mRNA HIGH	52	0.0998081	mRNA LOW	1	0.00191939	FUSION	0	0	MISSENSE, INFRAME, TRUNCATING MUTATIONS (PUTATIVE DRIVER)	0	0
ELF2	ALL	30	0.0575816	AMPLIFICATION	0	0	DEEP DELETION	1	0.00191939	mRNA HIGH	19	0.0364683	mRNA LOW	10	0.0191939	FUSION	0	0	MISSENSE, INFRAME, TRUNCATING MUTATIONS (PUTATIVE DRIVER)	0	0
ELOB	ALL	21	0.0403071	AMPLIFICATION	0	0	DEEP DELETION	0	0	mRNA HIGH	21	0.0403071	mRNA LOW	0	0	FUSION	0	0	MISSENSE, INFRAME, TRUNCATING MUTATIONS (PUTATIVE DRIVER)	0	0
ELOC	ALL	99	0.190019	AMPLIFICATION	9	0.0172745	DEEP DELETION	0	0	mRNA HIGH	89	0.170825	mRNA LOW	1	0.00191939	FUSION	0	0	MISSENSE, INFRAME, TRUNCATING MUTATIONS (PUTATIVE DRIVER)	0	0
ENG	ALL	34	0.0652591	AMPLIFICATION	0	0	DEEP DELETION	0	0	mRNA HIGH	34	0.0652591	mRNA LOW	0	0	FUSION	0	0	MISSENSE, INFRAME, TRUNCATING MUTATIONS (PUTATIVE DRIVER)	0	0
ENO1	ALL	25	0.0479846	AMPLIFICATION	2	0.00383877	DEEP DELETION	4	0.00767754	mRNA HIGH	17	0.0326296	mRNA LOW	2	0.00383877	FUSION	0	0	MISSENSE, INFRAME, TRUNCATING MUTATIONS (PUTATIVE DRIVER)	0	0
ENO2	ALL	28	0.0537428	AMPLIFICATION	4	0.00767754	DEEP DELETION	0	0	mRNA HIGH	23	0.0441459	mRNA LOW	0	0	FUSION	1	0.00191939	MISSENSE, INFRAME, TRUNCATING MUTATIONS (PUTATIVE DRIVER)	0	0
ENO3	ALL	19	0.0364683	AMPLIFICATION	0	0	DEEP DELETION	6	0.0115163	mRNA HIGH	13	0.024952	mRNA LOW	0	0	FUSION	0	0	MISSENSE, INFRAME, TRUNCATING MUTATIONS (PUTATIVE DRIVER)	0	0
ENO4	ALL	2	0.00383877	AMPLIFICATION	1	0.00191939	DEEP DELETION	1	0.00191939	mRNA HIGH	0	0	mRNA LOW	0	0	FUSION	0	0	MISSENSE, INFRAME, TRUNCATING MUTATIONS (PUTATIVE DRIVER)	0	0
EP300	ALL	36	0.0690979	AMPLIFICATION	0	0	DEEP DELETION	1	0.00191939	mRNA HIGH	11	0.0211132	mRNA LOW	15	0.0287908	FUSION	0	0	MISSENSE, INFRAME, TRUNCATING MUTATIONS (PUTATIVE DRIVER)	9	0.0172745
EPAS1	ALL	17	0.0326296	AMPLIFICATION	0	0	DEEP DELETION	1	0.00191939	mRNA HIGH	15	0.0287908	mRNA LOW	1	0.00191939	FUSION	0	0	MISSENSE, INFRAME, TRUNCATING MUTATIONS (PUTATIVE DRIVER)	0	0
EPO	ALL	16	0.0307102	AMPLIFICATION	2	0.00383877	DEEP DELETION	0	0	mRNA HIGH	14	0.0268714	mRNA LOW	0	0	FUSION	0	0	MISSENSE, INFRAME, TRUNCATING MUTATIONS (PUTATIVE DRIVER)	0	0
ERBB2	ALL	73	0.140115	AMPLIFICATION	18	0.0345489	DEEP DELETION	0	0	mRNA HIGH	42	0.0806142	mRNA LOW	3	0.00575816	FUSION	1	0.00191939	MISSENSE, INFRAME, TRUNCATING MUTATIONS (PUTATIVE DRIVER)	9	0.0172745
ETS1	ALL	27	0.0518234	AMPLIFICATION	0	0	DEEP DELETION	0	0	mRNA HIGH	27	0.0518234	mRNA LOW	0	0	FUSION	0	0	MISSENSE, INFRAME, TRUNCATING MUTATIONS (PUTATIVE DRIVER)	0	0
FLT1	ALL	42	0.0806142	AMPLIFICATION	23	0.0441459	DEEP DELETION	0	0	mRNA HIGH	17	0.0326296	mRNA LOW	0	0	FUSION	0	0	MISSENSE, INFRAME, TRUNCATING MUTATIONS (PUTATIVE DRIVER)	2	0.00383877
GAPDH	ALL	43	0.0825336	AMPLIFICATION	5	0.00959693	DEEP DELETION	0	0	mRNA HIGH	38	0.0729367	mRNA LOW	0	0	FUSION	0	0	MISSENSE, INFRAME, TRUNCATING MUTATIONS (PUTATIVE DRIVER)	0	0
GATA6	ALL	16	0.0307102	AMPLIFICATION	1	0.00191939	DEEP DELETION	1	0.00191939	mRNA HIGH	11	0.0211132	mRNA LOW	3	0.00575816	FUSION	0	0	MISSENSE, INFRAME, TRUNCATING MUTATIONS (PUTATIVE DRIVER)	0	0
HBB	ALL	16	0.0307102	AMPLIFICATION	0	0	DEEP DELETION	0	0	mRNA HIGH	16	0.0307102	mRNA LOW	0	0	FUSION	0	0	MISSENSE, INFRAME, TRUNCATING MUTATIONS (PUTATIVE DRIVER)	0	0
HBG2	ALL	9	0.0172745	AMPLIFICATION	0	0	DEEP DELETION	0	0	mRNA HIGH	9	0.0172745	mRNA LOW	0	0	FUSION	0	0	MISSENSE, INFRAME, TRUNCATING MUTATIONS (PUTATIVE DRIVER)	0	0
HIF1A	ALL	18	0.0345489	AMPLIFICATION	0	0	DEEP DELETION	0	0	mRNA HIGH	18	0.0345489	mRNA LOW	0	0	FUSION	0	0	MISSENSE, INFRAME, TRUNCATING MUTATIONS (PUTATIVE DRIVER)	0	0
HIF3A	ALL	26	0.049904	AMPLIFICATION	0	0	DEEP DELETION	0	0	mRNA HIGH	26	0.049904	mRNA LOW	0	0	FUSION	0	0	MISSENSE, INFRAME, TRUNCATING MUTATIONS (PUTATIVE DRIVER)	0	0
HK1	ALL	27	0.0518234	AMPLIFICATION	2	0.00383877	DEEP DELETION	1	0.00191939	mRNA HIGH	19	0.0364683	mRNA LOW	4	0.00767754	FUSION	1	0.00191939	MISSENSE, INFRAME, TRUNCATING MUTATIONS (PUTATIVE DRIVER)	0	0
HK2	ALL	25	0.0479846	AMPLIFICATION	0	0	DEEP DELETION	0	0	mRNA HIGH	25	0.0479846	mRNA LOW	0	0	FUSION	0	0	MISSENSE, INFRAME, TRUNCATING MUTATIONS (PUTATIVE DRIVER)	0	0
HK3	ALL	28	0.0537428	AMPLIFICATION	1	0.00191939	DEEP DELETION	0	0	mRNA HIGH	27	0.0518234	mRNA LOW	0	0	FUSION	0	0	MISSENSE, INFRAME, TRUNCATING MUTATIONS (PUTATIVE DRIVER)	0	0
HKDC1	ALL	26	0.049904	AMPLIFICATION	1	0.00191939	DEEP DELETION	0	0	mRNA HIGH	25	0.0479846	mRNA LOW	0	0	FUSION	0	0	MISSENSE, INFRAME, TRUNCATING MUTATIONS (PUTATIVE DRIVER)	0	0
HMBS	ALL	26	0.049904	AMPLIFICATION	1	0.00191939	DEEP DELETION	0	0	mRNA HIGH	25	0.0479846	mRNA LOW	0	0	FUSION	0	0	MISSENSE, INFRAME, TRUNCATING MUTATIONS (PUTATIVE DRIVER)	0	0
HMOX1	ALL	22	0.0422265	AMPLIFICATION	1	0.00191939	DEEP DELETION	0	0	mRNA HIGH	21	0.0403071	mRNA LOW	0	0	FUSION	0	0	MISSENSE, INFRAME, TRUNCATING MUTATIONS (PUTATIVE DRIVER)	0	0
HMOX2	ALL	43	0.0825336	AMPLIFICATION	0	0	DEEP DELETION	0	0	mRNA HIGH	37	0.0710173	mRNA LOW	6	0.0115163	FUSION	0	0	MISSENSE, INFRAME, TRUNCATING MUTATIONS (PUTATIVE DRIVER)	0	0
HSP90B1	ALL	30	0.0575816	AMPLIFICATION	0	0	DEEP DELETION	0	0	mRNA HIGH	24	0.0460653	mRNA LOW	6	0.0115163	FUSION	0	0	MISSENSE, INFRAME, TRUNCATING MUTATIONS (PUTATIVE DRIVER)	0	0
HYOU1	ALL	33	0.0633397	AMPLIFICATION	1	0.00191939	DEEP DELETION	0	0	mRNA HIGH	29	0.0556622	mRNA LOW	3	0.00575816	FUSION	0	0	MISSENSE, INFRAME, TRUNCATING MUTATIONS (PUTATIVE DRIVER)	0	0
IFNG	ALL	32	0.0614203	AMPLIFICATION	1	0.00191939	DEEP DELETION	0	0	mRNA HIGH	31	0.059501	mRNA LOW	0	0	FUSION	0	0	MISSENSE, INFRAME, TRUNCATING MUTATIONS (PUTATIVE DRIVER)	0	0
IFNGR1	ALL	27	0.0518234	AMPLIFICATION	2	0.00383877	DEEP DELETION	0	0	mRNA HIGH	25	0.0479846	mRNA LOW	0	0	FUSION	0	0	MISSENSE, INFRAME, TRUNCATING MUTATIONS (PUTATIVE DRIVER)	0	0
IFNGR2	ALL	29	0.0556622	AMPLIFICATION	0	0	DEEP DELETION	0	0	mRNA HIGH	19	0.0364683	mRNA LOW	9	0.0172745	FUSION	1	0.00191939	MISSENSE, INFRAME, TRUNCATING MUTATIONS (PUTATIVE DRIVER)	0	0
IGF1	ALL	16	0.0307102	AMPLIFICATION	0	0	DEEP DELETION	0	0	mRNA HIGH	16	0.0307102	mRNA LOW	0	0	FUSION	0	0	MISSENSE, INFRAME, TRUNCATING MUTATIONS (PUTATIVE DRIVER)	0	0
IGF1R	ALL	22	0.0422265	AMPLIFICATION	2	0.00383877	DEEP DELETION	1	0.00191939	mRNA HIGH	19	0.0364683	mRNA LOW	0	0	FUSION	0	0	MISSENSE, INFRAME, TRUNCATING MUTATIONS (PUTATIVE DRIVER)	0	0
IGFBP1	ALL	20	0.0383877	AMPLIFICATION	1	0.00191939	DEEP DELETION	0	0	mRNA HIGH	19	0.0364683	mRNA LOW	0	0	FUSION	0	0	MISSENSE, INFRAME, TRUNCATING MUTATIONS (PUTATIVE DRIVER)	0	0
IGFBP2	ALL	22	0.0422265	AMPLIFICATION	0	0	DEEP DELETION	0	0	mRNA HIGH	22	0.0422265	mRNA LOW	0	0	FUSION	0	0	MISSENSE, INFRAME, TRUNCATING MUTATIONS (PUTATIVE DRIVER)	0	0
IL1A	ALL	21	0.0403071	AMPLIFICATION	0	0	DEEP DELETION	0	0	mRNA HIGH	21	0.0403071	mRNA LOW	0	0	FUSION	0	0	MISSENSE, INFRAME, TRUNCATING MUTATIONS (PUTATIVE DRIVER)	0	0
IL1B	ALL	7	0.0134357	AMPLIFICATION	0	0	DEEP DELETION	0	0	mRNA HIGH	7	0.0134357	mRNA LOW	0	0	FUSION	0	0	MISSENSE, INFRAME, TRUNCATING MUTATIONS (PUTATIVE DRIVER)	0	0
IL6	ALL	23	0.0441459	AMPLIFICATION	2	0.00383877	DEEP DELETION	0	0	mRNA HIGH	21	0.0403071	mRNA LOW	0	0	FUSION	0	0	MISSENSE, INFRAME, TRUNCATING MUTATIONS (PUTATIVE DRIVER)	0	0
IL6R	ALL	26	0.049904	AMPLIFICATION	3	0.00575816	DEEP DELETION	0	0	mRNA HIGH	23	0.0441459	mRNA LOW	0	0	FUSION	0	0	MISSENSE, INFRAME, TRUNCATING MUTATIONS (PUTATIVE DRIVER)	0	0
INS	ALL	17	0.0326296	AMPLIFICATION	12	0.0230326	DEEP DELETION	1	0.00191939	mRNA HIGH	4	0.00767754	mRNA LOW	0	0	FUSION	0	0	MISSENSE, INFRAME, TRUNCATING MUTATIONS (PUTATIVE DRIVER)	0	0
INSR	ALL	24	0.0460653	AMPLIFICATION	0	0	DEEP DELETION	3	0.00575816	mRNA HIGH	20	0.0383877	mRNA LOW	1	0.00191939	FUSION	0	0	MISSENSE, INFRAME, TRUNCATING MUTATIONS (PUTATIVE DRIVER)	0	0
ITPR1	ALL	24	0.0460653	AMPLIFICATION	0	0	DEEP DELETION	1	0.00191939	mRNA HIGH	23	0.0441459	mRNA LOW	0	0	FUSION	0	0	MISSENSE, INFRAME, TRUNCATING MUTATIONS (PUTATIVE DRIVER)	0	0
ITPR2	ALL	45	0.0863724	AMPLIFICATION	4	0.00767754	DEEP DELETION	1	0.00191939	mRNA HIGH	40	0.0767754	mRNA LOW	0	0	FUSION	0	0	MISSENSE, INFRAME, TRUNCATING MUTATIONS (PUTATIVE DRIVER)	0	0
KCNK3	ALL	15	0.0287908	AMPLIFICATION	0	0	DEEP DELETION	0	0	mRNA HIGH	15	0.0287908	mRNA LOW	0	0	FUSION	0	0	MISSENSE, INFRAME, TRUNCATING MUTATIONS (PUTATIVE DRIVER)	0	0
KCNMA1	ALL	22	0.0422265	AMPLIFICATION	4	0.00767754	DEEP DELETION	1	0.00191939	mRNA HIGH	17	0.0326296	mRNA LOW	0	0	FUSION	0	0	MISSENSE, INFRAME, TRUNCATING MUTATIONS (PUTATIVE DRIVER)	0	0
LDHA	ALL	33	0.0633397	AMPLIFICATION	1	0.00191939	DEEP DELETION	0	0	mRNA HIGH	30	0.0575816	mRNA LOW	2	0.00383877	FUSION	0	0	MISSENSE, INFRAME, TRUNCATING MUTATIONS (PUTATIVE DRIVER)	0	0
LDHAL6A	ALL	14	0.0268714	AMPLIFICATION	1	0.00191939	DEEP DELETION	0	0	mRNA HIGH	13	0.024952	mRNA LOW	0	0	FUSION	0	0	MISSENSE, INFRAME, TRUNCATING MUTATIONS (PUTATIVE DRIVER)	0	0
LDHAL6B	ALL	12	0.0230326	AMPLIFICATION	0	0	DEEP DELETION	3	0.00575816	mRNA HIGH	9	0.0172745	mRNA LOW	0	0	FUSION	0	0	MISSENSE, INFRAME, TRUNCATING MUTATIONS (PUTATIVE DRIVER)	0	0
LDHB	ALL	37	0.0710173	AMPLIFICATION	2	0.00383877	DEEP DELETION	1	0.00191939	mRNA HIGH	34	0.0652591	mRNA LOW	0	0	FUSION	0	0	MISSENSE, INFRAME, TRUNCATING MUTATIONS (PUTATIVE DRIVER)	0	0
LDHC	ALL	37	0.0710173	AMPLIFICATION	1	0.00191939	DEEP DELETION	0	0	mRNA HIGH	36	0.0690979	mRNA LOW	0	0	FUSION	0	0	MISSENSE, INFRAME, TRUNCATING MUTATIONS (PUTATIVE DRIVER)	0	0
LMNA	ALL	35	0.0671785	AMPLIFICATION	3	0.00575816	DEEP DELETION	0	0	mRNA HIGH	30	0.0575816	mRNA LOW	2	0.00383877	FUSION	0	0	MISSENSE, INFRAME, TRUNCATING MUTATIONS (PUTATIVE DRIVER)	0	0
LTBR	ALL	50	0.0959693	AMPLIFICATION	5	0.00959693	DEEP DELETION	0	0	mRNA HIGH	38	0.0729367	mRNA LOW	7	0.0134357	FUSION	0	0	MISSENSE, INFRAME, TRUNCATING MUTATIONS (PUTATIVE DRIVER)	0	0
MAP2K1	ALL	64	0.122841	AMPLIFICATION	0	0	DEEP DELETION	0	0	mRNA HIGH	12	0.0230326	mRNA LOW	43	0.0825336	FUSION	0	0	MISSENSE, INFRAME, TRUNCATING MUTATIONS (PUTATIVE DRIVER)	9	0.0172745
MAP2K2	ALL	34	0.0652591	AMPLIFICATION	0	0	DEEP DELETION	3	0.00575816	mRNA HIGH	30	0.0575816	mRNA LOW	1	0.00191939	FUSION	0	0	MISSENSE, INFRAME, TRUNCATING MUTATIONS (PUTATIVE DRIVER)	0	0
MAPK1	ALL	66	0.126679	AMPLIFICATION	1	0.00191939	DEEP DELETION	1	0.00191939	mRNA HIGH	15	0.0287908	mRNA LOW	49	0.0940499	FUSION	0	0	MISSENSE, INFRAME, TRUNCATING MUTATIONS (PUTATIVE DRIVER)	0	0
MAPK3	ALL	35	0.0671785	AMPLIFICATION	2	0.00383877	DEEP DELETION	0	0	mRNA HIGH	33	0.0633397	mRNA LOW	0	0	FUSION	0	0	MISSENSE, INFRAME, TRUNCATING MUTATIONS (PUTATIVE DRIVER)	0	0
MDM2	ALL	36	0.0690979	AMPLIFICATION	1	0.00191939	DEEP DELETION	0	0	mRNA HIGH	35	0.0671785	mRNA LOW	0	0	FUSION	0	0	MISSENSE, INFRAME, TRUNCATING MUTATIONS (PUTATIVE DRIVER)	0	0
MDM4	ALL	45	0.0863724	AMPLIFICATION	4	0.00767754	DEEP DELETION	0	0	mRNA HIGH	40	0.0767754	mRNA LOW	1	0.00191939	FUSION	0	0	MISSENSE, INFRAME, TRUNCATING MUTATIONS (PUTATIVE DRIVER)	0	0
MKNK1	ALL	41	0.0786948	AMPLIFICATION	0	0	DEEP DELETION	0	0	mRNA HIGH	22	0.0422265	mRNA LOW	19	0.0364683	FUSION	0	0	MISSENSE, INFRAME, TRUNCATING MUTATIONS (PUTATIVE DRIVER)	0	0
MKNK2	ALL	33	0.0633397	AMPLIFICATION	0	0	DEEP DELETION	4	0.00767754	mRNA HIGH	27	0.0518234	mRNA LOW	2	0.00383877	FUSION	0	0	MISSENSE, INFRAME, TRUNCATING MUTATIONS (PUTATIVE DRIVER)	0	0
MMP14	ALL	21	0.0403071	AMPLIFICATION	0	0	DEEP DELETION	0	0	mRNA HIGH	21	0.0403071	mRNA LOW	0	0	FUSION	0	0	MISSENSE, INFRAME, TRUNCATING MUTATIONS (PUTATIVE DRIVER)	0	0
MMP2	ALL	21	0.0403071	AMPLIFICATION	0	0	DEEP DELETION	0	0	mRNA HIGH	21	0.0403071	mRNA LOW	0	0	FUSION	0	0	MISSENSE, INFRAME, TRUNCATING MUTATIONS (PUTATIVE DRIVER)	0	0
MMP3	ALL	22	0.0422265	AMPLIFICATION	0	0	DEEP DELETION	1	0.00191939	mRNA HIGH	21	0.0403071	mRNA LOW	0	0	FUSION	0	0	MISSENSE, INFRAME, TRUNCATING MUTATIONS (PUTATIVE DRIVER)	0	0
MT3	ALL	20	0.0383877	AMPLIFICATION	1	0.00191939	DEEP DELETION	0	0	mRNA HIGH	19	0.0364683	mRNA LOW	0	0	FUSION	0	0	MISSENSE, INFRAME, TRUNCATING MUTATIONS (PUTATIVE DRIVER)	0	0
MTOR	ALL	36	0.0690979	AMPLIFICATION	0	0	DEEP DELETION	3	0.00575816	mRNA HIGH	11	0.0211132	mRNA LOW	16	0.0307102	FUSION	0	0	MISSENSE, INFRAME, TRUNCATING MUTATIONS (PUTATIVE DRIVER)	6	0.0115163
NDRG1	ALL	62	0.119002	AMPLIFICATION	14	0.0268714	DEEP DELETION	0	0	mRNA HIGH	48	0.0921305	mRNA LOW	0	0	FUSION	0	0	MISSENSE, INFRAME, TRUNCATING MUTATIONS (PUTATIVE DRIVER)	0	0
NFKB1	ALL	36	0.0690979	AMPLIFICATION	0	0	DEEP DELETION	1	0.00191939	mRNA HIGH	17	0.0326296	mRNA LOW	18	0.0345489	FUSION	0	0	MISSENSE, INFRAME, TRUNCATING MUTATIONS (PUTATIVE DRIVER)	0	0
NOS1	ALL	14	0.0268714	AMPLIFICATION	0	0	DEEP DELETION	0	0	mRNA HIGH	14	0.0268714	mRNA LOW	0	0	FUSION	0	0	MISSENSE, INFRAME, TRUNCATING MUTATIONS (PUTATIVE DRIVER)	0	0
NOS2	ALL	24	0.0460653	AMPLIFICATION	6	0.0115163	DEEP DELETION	0	0	mRNA HIGH	18	0.0345489	mRNA LOW	0	0	FUSION	0	0	MISSENSE, INFRAME, TRUNCATING MUTATIONS (PUTATIVE DRIVER)	0	0
NOS3	ALL	23	0.0441459	AMPLIFICATION	0	0	DEEP DELETION	1	0.00191939	mRNA HIGH	22	0.0422265	mRNA LOW	0	0	FUSION	0	0	MISSENSE, INFRAME, TRUNCATING MUTATIONS (PUTATIVE DRIVER)	0	0
NOTCH1	ALL	23	0.0441459	AMPLIFICATION	4	0.00767754	DEEP DELETION	0	0	mRNA HIGH	16	0.0307102	mRNA LOW	0	0	FUSION	0	0	MISSENSE, INFRAME, TRUNCATING MUTATIONS (PUTATIVE DRIVER)	3	0.00575816
NPEPPS	ALL	41	0.0786948	AMPLIFICATION	2	0.00383877	DEEP DELETION	0	0	mRNA HIGH	23	0.0441459	mRNA LOW	16	0.0307102	FUSION	0	0	MISSENSE, INFRAME, TRUNCATING MUTATIONS (PUTATIVE DRIVER)	0	0
NPPA	ALL	20	0.0383877	AMPLIFICATION	0	0	DEEP DELETION	3	0.00575816	mRNA HIGH	17	0.0326296	mRNA LOW	0	0	FUSION	0	0	MISSENSE, INFRAME, TRUNCATING MUTATIONS (PUTATIVE DRIVER)	0	0
NPPB	ALL	9	0.0172745	AMPLIFICATION	0	0	DEEP DELETION	3	0.00575816	mRNA HIGH	6	0.0115163	mRNA LOW	0	0	FUSION	0	0	MISSENSE, INFRAME, TRUNCATING MUTATIONS (PUTATIVE DRIVER)	0	0
NR4A2	ALL	27	0.0518234	AMPLIFICATION	0	0	DEEP DELETION	2	0.00383877	mRNA HIGH	25	0.0479846	mRNA LOW	0	0	FUSION	0	0	MISSENSE, INFRAME, TRUNCATING MUTATIONS (PUTATIVE DRIVER)	0	0
NRP1	ALL	30	0.0575816	AMPLIFICATION	2	0.00383877	DEEP DELETION	0	0	mRNA HIGH	28	0.0537428	mRNA LOW	0	0	FUSION	0	0	MISSENSE, INFRAME, TRUNCATING MUTATIONS (PUTATIVE DRIVER)	0	0
NRP2	ALL	23	0.0441459	AMPLIFICATION	0	0	DEEP DELETION	0	0	mRNA HIGH	23	0.0441459	mRNA LOW	0	0	FUSION	0	0	MISSENSE, INFRAME, TRUNCATING MUTATIONS (PUTATIVE DRIVER)	0	0
OS9	ALL	33	0.0633397	AMPLIFICATION	0	0	DEEP DELETION	0	0	mRNA HIGH	30	0.0575816	mRNA LOW	3	0.00575816	FUSION	0	0	MISSENSE, INFRAME, TRUNCATING MUTATIONS (PUTATIVE DRIVER)	0	0
PAM	ALL	34	0.0652591	AMPLIFICATION	0	0	DEEP DELETION	12	0.0230326	mRNA HIGH	22	0.0422265	mRNA LOW	0	0	FUSION	0	0	MISSENSE, INFRAME, TRUNCATING MUTATIONS (PUTATIVE DRIVER)	0	0
PDE5A	ALL	23	0.0441459	AMPLIFICATION	0	0	DEEP DELETION	2	0.00383877	mRNA HIGH	21	0.0403071	mRNA LOW	0	0	FUSION	0	0	MISSENSE, INFRAME, TRUNCATING MUTATIONS (PUTATIVE DRIVER)	0	0
PDGFB	ALL	27	0.0518234	AMPLIFICATION	0	0	DEEP DELETION	0	0	mRNA HIGH	27	0.0518234	mRNA LOW	0	0	FUSION	0	0	MISSENSE, INFRAME, TRUNCATING MUTATIONS (PUTATIVE DRIVER)	0	0
PDHA1	ALL	35	0.0671785	AMPLIFICATION	4	0.00767754	DEEP DELETION	2	0.00383877	mRNA HIGH	29	0.0556622	mRNA LOW	0	0	FUSION	0	0	MISSENSE, INFRAME, TRUNCATING MUTATIONS (PUTATIVE DRIVER)	0	0
PDHA2	ALL	20	0.0383877	AMPLIFICATION	0	0	DEEP DELETION	0	0	mRNA HIGH	20	0.0383877	mRNA LOW	0	0	FUSION	0	0	MISSENSE, INFRAME, TRUNCATING MUTATIONS (PUTATIVE DRIVER)	0	0
PDHB	ALL	40	0.0767754	AMPLIFICATION	0	0	DEEP DELETION	2	0.00383877	mRNA HIGH	26	0.049904	mRNA LOW	12	0.0230326	FUSION	0	0	MISSENSE, INFRAME, TRUNCATING MUTATIONS (PUTATIVE DRIVER)	0	0
PDIA2	ALL	13	0.024952	AMPLIFICATION	1	0.00191939	DEEP DELETION	2	0.00383877	mRNA HIGH	10	0.0191939	mRNA LOW	0	0	FUSION	0	0	MISSENSE, INFRAME, TRUNCATING MUTATIONS (PUTATIVE DRIVER)	0	0
PDK1	ALL	21	0.0403071	AMPLIFICATION	0	0	DEEP DELETION	0	0	mRNA HIGH	21	0.0403071	mRNA LOW	0	0	FUSION	0	0	MISSENSE, INFRAME, TRUNCATING MUTATIONS (PUTATIVE DRIVER)	0	0
PFKFB3	ALL	27	0.0518234	AMPLIFICATION	1	0.00191939	DEEP DELETION	0	0	mRNA HIGH	26	0.049904	mRNA LOW	0	0	FUSION	0	0	MISSENSE, INFRAME, TRUNCATING MUTATIONS (PUTATIVE DRIVER)	0	0
PFKL	ALL	23	0.0441459	AMPLIFICATION	0	0	DEEP DELETION	1	0.00191939	mRNA HIGH	17	0.0326296	mRNA LOW	5	0.00959693	FUSION	0	0	MISSENSE, INFRAME, TRUNCATING MUTATIONS (PUTATIVE DRIVER)	0	0
PFKM	ALL	40	0.0767754	AMPLIFICATION	0	0	DEEP DELETION	0	0	mRNA HIGH	31	0.059501	mRNA LOW	9	0.0172745	FUSION	0	0	MISSENSE, INFRAME, TRUNCATING MUTATIONS (PUTATIVE DRIVER)	0	0
PFKP	ALL	27	0.0518234	AMPLIFICATION	2	0.00383877	DEEP DELETION	1	0.00191939	mRNA HIGH	24	0.0460653	mRNA LOW	0	0	FUSION	0	0	MISSENSE, INFRAME, TRUNCATING MUTATIONS (PUTATIVE DRIVER)	0	0
PGF	ALL	18	0.0345489	AMPLIFICATION	0	0	DEEP DELETION	0	0	mRNA HIGH	18	0.0345489	mRNA LOW	0	0	FUSION	0	0	MISSENSE, INFRAME, TRUNCATING MUTATIONS (PUTATIVE DRIVER)	0	0
PGK1	ALL	26	0.049904	AMPLIFICATION	0	0	DEEP DELETION	2	0.00383877	mRNA HIGH	24	0.0460653	mRNA LOW	0	0	FUSION	0	0	MISSENSE, INFRAME, TRUNCATING MUTATIONS (PUTATIVE DRIVER)	0	0
PGK2	ALL	22	0.0422265	AMPLIFICATION	2	0.00383877	DEEP DELETION	0	0	mRNA HIGH	20	0.0383877	mRNA LOW	0	0	FUSION	0	0	MISSENSE, INFRAME, TRUNCATING MUTATIONS (PUTATIVE DRIVER)	0	0
PIK3CA	ALL	166	0.318618	AMPLIFICATION	0	0	DEEP DELETION	0	0	mRNA HIGH	24	0.0460653	mRNA LOW	8	0.0153551	FUSION	0	0	MISSENSE, INFRAME, TRUNCATING MUTATIONS (PUTATIVE DRIVER)	134	0.257198
PIK3CB	ALL	44	0.084453	AMPLIFICATION	0	0	DEEP DELETION	0	0	mRNA HIGH	24	0.0460653	mRNA LOW	18	0.0345489	FUSION	0	0	MISSENSE, INFRAME, TRUNCATING MUTATIONS (PUTATIVE DRIVER)	2	0.00383877
PIK3CD	ALL	23	0.0441459	AMPLIFICATION	0	0	DEEP DELETION	4	0.00767754	mRNA HIGH	19	0.0364683	mRNA LOW	0	0	FUSION	0	0	MISSENSE, INFRAME, TRUNCATING MUTATIONS (PUTATIVE DRIVER)	0	0
PIK3CG	ALL	19	0.0364683	AMPLIFICATION	1	0.00191939	DEEP DELETION	0	0	mRNA HIGH	18	0.0345489	mRNA LOW	0	0	FUSION	0	0	MISSENSE, INFRAME, TRUNCATING MUTATIONS (PUTATIVE DRIVER)	0	0
PIK3R1	ALL	51	0.0978887	AMPLIFICATION	0	0	DEEP DELETION	4	0.00767754	mRNA HIGH	21	0.0403071	mRNA LOW	0	0	FUSION	0	0	MISSENSE, INFRAME, TRUNCATING MUTATIONS (PUTATIVE DRIVER)	26	0.049904
PIK3R2	ALL	23	0.0441459	AMPLIFICATION	1	0.00191939	DEEP DELETION	3	0.00575816	mRNA HIGH	16	0.0307102	mRNA LOW	1	0.00191939	FUSION	0	0	MISSENSE, INFRAME, TRUNCATING MUTATIONS (PUTATIVE DRIVER)	2	0.00383877
PIK3R3	ALL	22	0.0422265	AMPLIFICATION	0	0	DEEP DELETION	0	0	mRNA HIGH	21	0.0403071	mRNA LOW	0	0	FUSION	0	0	MISSENSE, INFRAME, TRUNCATING MUTATIONS (PUTATIVE DRIVER)	1	0.00191939
PKLR	ALL	31	0.059501	AMPLIFICATION	3	0.00575816	DEEP DELETION	0	0	mRNA HIGH	28	0.0537428	mRNA LOW	0	0	FUSION	0	0	MISSENSE, INFRAME, TRUNCATING MUTATIONS (PUTATIVE DRIVER)	0	0
PLCG1	ALL	225	0.431862	AMPLIFICATION	30	0.0575816	DEEP DELETION	1	0.00191939	mRNA HIGH	193	0.370441	mRNA LOW	1	0.00191939	FUSION	0	0	MISSENSE, INFRAME, TRUNCATING MUTATIONS (PUTATIVE DRIVER)	0	0
PLCG2	ALL	20	0.0383877	AMPLIFICATION	0	0	DEEP DELETION	1	0.00191939	mRNA HIGH	19	0.0364683	mRNA LOW	0	0	FUSION	0	0	MISSENSE, INFRAME, TRUNCATING MUTATIONS (PUTATIVE DRIVER)	0	0
PLOD1	ALL	23	0.0441459	AMPLIFICATION	0	0	DEEP DELETION	3	0.00575816	mRNA HIGH	20	0.0383877	mRNA LOW	0	0	FUSION	0	0	MISSENSE, INFRAME, TRUNCATING MUTATIONS (PUTATIVE DRIVER)	0	0
PLOD2	ALL	21	0.0403071	AMPLIFICATION	0	0	DEEP DELETION	0	0	mRNA HIGH	21	0.0403071	mRNA LOW	0	0	FUSION	0	0	MISSENSE, INFRAME, TRUNCATING MUTATIONS (PUTATIVE DRIVER)	0	0
PMAIP1	ALL	12	0.0230326	AMPLIFICATION	0	0	DEEP DELETION	9	0.0172745	mRNA HIGH	3	0.00575816	mRNA LOW	0	0	FUSION	0	0	MISSENSE, INFRAME, TRUNCATING MUTATIONS (PUTATIVE DRIVER)	0	0
PML	ALL	19	0.0364683	AMPLIFICATION	0	0	DEEP DELETION	0	0	mRNA HIGH	19	0.0364683	mRNA LOW	0	0	FUSION	0	0	MISSENSE, INFRAME, TRUNCATING MUTATIONS (PUTATIVE DRIVER)	0	0
POLR2A	ALL	21	0.0403071	AMPLIFICATION	0	0	DEEP DELETION	6	0.0115163	mRNA HIGH	9	0.0172745	mRNA LOW	6	0.0115163	FUSION	0	0	MISSENSE, INFRAME, TRUNCATING MUTATIONS (PUTATIVE DRIVER)	0	0
PPARA	ALL	19	0.0364683	AMPLIFICATION	1	0.00191939	DEEP DELETION	2	0.00383877	mRNA HIGH	12	0.0230326	mRNA LOW	4	0.00767754	FUSION	0	0	MISSENSE, INFRAME, TRUNCATING MUTATIONS (PUTATIVE DRIVER)	0	0
PRKAA1	ALL	46	0.0882917	AMPLIFICATION	3	0.00575816	DEEP DELETION	0	0	mRNA HIGH	34	0.0652591	mRNA LOW	9	0.0172745	FUSION	0	0	MISSENSE, INFRAME, TRUNCATING MUTATIONS (PUTATIVE DRIVER)	0	0
PRKAA2	ALL	25	0.0479846	AMPLIFICATION	0	0	DEEP DELETION	0	0	mRNA HIGH	25	0.0479846	mRNA LOW	0	0	FUSION	0	0	MISSENSE, INFRAME, TRUNCATING MUTATIONS (PUTATIVE DRIVER)	0	0
PRKCA	ALL	39	0.074856	AMPLIFICATION	9	0.0172745	DEEP DELETION	1	0.00191939	mRNA HIGH	28	0.0537428	mRNA LOW	0	0	FUSION	1	0.00191939	MISSENSE, INFRAME, TRUNCATING MUTATIONS (PUTATIVE DRIVER)	0	0
PRKCB	ALL	21	0.0403071	AMPLIFICATION	2	0.00383877	DEEP DELETION	1	0.00191939	mRNA HIGH	18	0.0345489	mRNA LOW	0	0	FUSION	0	0	MISSENSE, INFRAME, TRUNCATING MUTATIONS (PUTATIVE DRIVER)	0	0
PRKCG	ALL	14	0.0268714	AMPLIFICATION	0	0	DEEP DELETION	0	0	mRNA HIGH	14	0.0268714	mRNA LOW	0	0	FUSION	0	0	MISSENSE, INFRAME, TRUNCATING MUTATIONS (PUTATIVE DRIVER)	0	0
PSEN2	ALL	61	0.117083	AMPLIFICATION	3	0.00575816	DEEP DELETION	0	0	mRNA HIGH	56	0.107486	mRNA LOW	2	0.00383877	FUSION	0	0	MISSENSE, INFRAME, TRUNCATING MUTATIONS (PUTATIVE DRIVER)	0	0
PSMC3	ALL	35	0.0671785	AMPLIFICATION	1	0.00191939	DEEP DELETION	0	0	mRNA HIGH	31	0.059501	mRNA LOW	3	0.00575816	FUSION	0	0	MISSENSE, INFRAME, TRUNCATING MUTATIONS (PUTATIVE DRIVER)	0	0
RBX1	ALL	24	0.0460653	AMPLIFICATION	0	0	DEEP DELETION	0	0	mRNA HIGH	23	0.0441459	mRNA LOW	1	0.00191939	FUSION	0	0	MISSENSE, INFRAME, TRUNCATING MUTATIONS (PUTATIVE DRIVER)	0	0
RELA	ALL	43	0.0825336	AMPLIFICATION	0	0	DEEP DELETION	1	0.00191939	mRNA HIGH	19	0.0364683	mRNA LOW	23	0.0441459	FUSION	0	0	MISSENSE, INFRAME, TRUNCATING MUTATIONS (PUTATIVE DRIVER)	0	0
RPS6	ALL	25	0.0479846	AMPLIFICATION	2	0.00383877	DEEP DELETION	1	0.00191939	mRNA HIGH	22	0.0422265	mRNA LOW	0	0	FUSION	0	0	MISSENSE, INFRAME, TRUNCATING MUTATIONS (PUTATIVE DRIVER)	0	0
RPS6KB1	ALL	50	0.0959693	AMPLIFICATION	6	0.0115163	DEEP DELETION	0	0	mRNA HIGH	26	0.049904	mRNA LOW	18	0.0345489	FUSION	0	0	MISSENSE, INFRAME, TRUNCATING MUTATIONS (PUTATIVE DRIVER)	0	0
RPS6KB2	ALL	27	0.0518234	AMPLIFICATION	1	0.00191939	DEEP DELETION	1	0.00191939	mRNA HIGH	24	0.0460653	mRNA LOW	1	0.00191939	FUSION	0	0	MISSENSE, INFRAME, TRUNCATING MUTATIONS (PUTATIVE DRIVER)	0	0
RYR1	ALL	18	0.0345489	AMPLIFICATION	4	0.00767754	DEEP DELETION	0	0	mRNA HIGH	14	0.0268714	mRNA LOW	0	0	FUSION	0	0	MISSENSE, INFRAME, TRUNCATING MUTATIONS (PUTATIVE DRIVER)	0	0
SATB1	ALL	18	0.0345489	AMPLIFICATION	1	0.00191939	DEEP DELETION	0	0	mRNA HIGH	17	0.0326296	mRNA LOW	0	0	FUSION	0	0	MISSENSE, INFRAME, TRUNCATING MUTATIONS (PUTATIVE DRIVER)	0	0
SCNN1B	ALL	21	0.0403071	AMPLIFICATION	2	0.00383877	DEEP DELETION	1	0.00191939	mRNA HIGH	18	0.0345489	mRNA LOW	0	0	FUSION	0	0	MISSENSE, INFRAME, TRUNCATING MUTATIONS (PUTATIVE DRIVER)	0	0
SERPINE1	ALL	26	0.049904	AMPLIFICATION	3	0.00575816	DEEP DELETION	0	0	mRNA HIGH	23	0.0441459	mRNA LOW	0	0	FUSION	0	0	MISSENSE, INFRAME, TRUNCATING MUTATIONS (PUTATIVE DRIVER)	0	0
SFRP1	ALL	37	0.0710173	AMPLIFICATION	18	0.0345489	DEEP DELETION	3	0.00575816	mRNA HIGH	16	0.0307102	mRNA LOW	0	0	FUSION	0	0	MISSENSE, INFRAME, TRUNCATING MUTATIONS (PUTATIVE DRIVER)	0	0
SHC1	ALL	43	0.0825336	AMPLIFICATION	3	0.00575816	DEEP DELETION	0	0	mRNA HIGH	39	0.074856	mRNA LOW	1	0.00191939	FUSION	0	0	MISSENSE, INFRAME, TRUNCATING MUTATIONS (PUTATIVE DRIVER)	0	0
SLC29A1	ALL	51	0.0978887	AMPLIFICATION	6	0.0115163	DEEP DELETION	0	0	mRNA HIGH	43	0.0825336	mRNA LOW	2	0.00383877	FUSION	0	0	MISSENSE, INFRAME, TRUNCATING MUTATIONS (PUTATIVE DRIVER)	0	0
SLC2A1	ALL	21	0.0403071	AMPLIFICATION	1	0.00191939	DEEP DELETION	0	0	mRNA HIGH	20	0.0383877	mRNA LOW	0	0	FUSION	0	0	MISSENSE, INFRAME, TRUNCATING MUTATIONS (PUTATIVE DRIVER)	0	0
SLC8A1	ALL	30	0.0575816	AMPLIFICATION	0	0	DEEP DELETION	0	0	mRNA HIGH	30	0.0575816	mRNA LOW	0	0	FUSION	0	0	MISSENSE, INFRAME, TRUNCATING MUTATIONS (PUTATIVE DRIVER)	0	0
SMAD3	ALL	50	0.0959693	AMPLIFICATION	0	0	DEEP DELETION	9	0.0172745	mRNA HIGH	17	0.0326296	mRNA LOW	11	0.0211132	FUSION	0	0	MISSENSE, INFRAME, TRUNCATING MUTATIONS (PUTATIVE DRIVER)	13	0.024952
SMAD4	ALL	179	0.34357	AMPLIFICATION	0	0	DEEP DELETION	22	0.0422265	mRNA HIGH	5	0.00959693	mRNA LOW	97	0.18618	FUSION	0	0	MISSENSE, INFRAME, TRUNCATING MUTATIONS (PUTATIVE DRIVER)	55	0.105566
SNAI3	ALL	16	0.0307102	AMPLIFICATION	0	0	DEEP DELETION	2	0.00383877	mRNA HIGH	14	0.0268714	mRNA LOW	0	0	FUSION	0	0	MISSENSE, INFRAME, TRUNCATING MUTATIONS (PUTATIVE DRIVER)	0	0
SOD2	ALL	24	0.0460653	AMPLIFICATION	3	0.00575816	DEEP DELETION	1	0.00191939	mRNA HIGH	20	0.0383877	mRNA LOW	0	0	FUSION	0	0	MISSENSE, INFRAME, TRUNCATING MUTATIONS (PUTATIVE DRIVER)	0	0
SOD3	ALL	16	0.0307102	AMPLIFICATION	0	0	DEEP DELETION	0	0	mRNA HIGH	16	0.0307102	mRNA LOW	0	0	FUSION	0	0	MISSENSE, INFRAME, TRUNCATING MUTATIONS (PUTATIVE DRIVER)	0	0
SPRY2	ALL	67	0.128599	AMPLIFICATION	5	0.00959693	DEEP DELETION	0	0	mRNA HIGH	61	0.117083	mRNA LOW	1	0.00191939	FUSION	0	0	MISSENSE, INFRAME, TRUNCATING MUTATIONS (PUTATIVE DRIVER)	0	0
STAT3	ALL	46	0.0882917	AMPLIFICATION	3	0.00575816	DEEP DELETION	0	0	mRNA HIGH	31	0.059501	mRNA LOW	11	0.0211132	FUSION	1	0.00191939	MISSENSE, INFRAME, TRUNCATING MUTATIONS (PUTATIVE DRIVER)	0	0
STAT5B	ALL	51	0.0978887	AMPLIFICATION	3	0.00575816	DEEP DELETION	0	0	mRNA HIGH	40	0.0767754	mRNA LOW	8	0.0153551	FUSION	0	0	MISSENSE, INFRAME, TRUNCATING MUTATIONS (PUTATIVE DRIVER)	0	0
STC1	ALL	55	0.105566	AMPLIFICATION	0	0	DEEP DELETION	22	0.0422265	mRNA HIGH	33	0.0633397	mRNA LOW	0	0	FUSION	0	0	MISSENSE, INFRAME, TRUNCATING MUTATIONS (PUTATIVE DRIVER)	0	0
STC2	ALL	30	0.0575816	AMPLIFICATION	0	0	DEEP DELETION	0	0	mRNA HIGH	30	0.0575816	mRNA LOW	0	0	FUSION	0	0	MISSENSE, INFRAME, TRUNCATING MUTATIONS (PUTATIVE DRIVER)	0	0
TEK	ALL	47	0.0902111	AMPLIFICATION	1	0.00191939	DEEP DELETION	1	0.00191939	mRNA HIGH	45	0.0863724	mRNA LOW	0	0	FUSION	0	0	MISSENSE, INFRAME, TRUNCATING MUTATIONS (PUTATIVE DRIVER)	0	0
TF	ALL	19	0.0364683	AMPLIFICATION	0	0	DEEP DELETION	0	0	mRNA HIGH	19	0.0364683	mRNA LOW	0	0	FUSION	0	0	MISSENSE, INFRAME, TRUNCATING MUTATIONS (PUTATIVE DRIVER)	0	0
TFRC	ALL	31	0.059501	AMPLIFICATION	1	0.00191939	DEEP DELETION	0	0	mRNA HIGH	30	0.0575816	mRNA LOW	0	0	FUSION	0	0	MISSENSE, INFRAME, TRUNCATING MUTATIONS (PUTATIVE DRIVER)	0	0
TGFA	ALL	20	0.0383877	AMPLIFICATION	0	0	DEEP DELETION	0	0	mRNA HIGH	20	0.0383877	mRNA LOW	0	0	FUSION	0	0	MISSENSE, INFRAME, TRUNCATING MUTATIONS (PUTATIVE DRIVER)	0	0
TGFB1	ALL	31	0.059501	AMPLIFICATION	1	0.00191939	DEEP DELETION	0	0	mRNA HIGH	30	0.0575816	mRNA LOW	0	0	FUSION	0	0	MISSENSE, INFRAME, TRUNCATING MUTATIONS (PUTATIVE DRIVER)	0	0
TGFB2	ALL	25	0.0479846	AMPLIFICATION	3	0.00575816	DEEP DELETION	0	0	mRNA HIGH	22	0.0422265	mRNA LOW	0	0	FUSION	0	0	MISSENSE, INFRAME, TRUNCATING MUTATIONS (PUTATIVE DRIVER)	0	0
TGFB3	ALL	24	0.0460653	AMPLIFICATION	0	0	DEEP DELETION	0	0	mRNA HIGH	24	0.0460653	mRNA LOW	0	0	FUSION	0	0	MISSENSE, INFRAME, TRUNCATING MUTATIONS (PUTATIVE DRIVER)	0	0
TGFBR1	ALL	39	0.074856	AMPLIFICATION	1	0.00191939	DEEP DELETION	0	0	mRNA HIGH	28	0.0537428	mRNA LOW	3	0.00575816	FUSION	0	0	MISSENSE, INFRAME, TRUNCATING MUTATIONS (PUTATIVE DRIVER)	7	0.0134357
TH	ALL	34	0.0652591	AMPLIFICATION	12	0.0230326	DEEP DELETION	1	0.00191939	mRNA HIGH	21	0.0403071	mRNA LOW	0	0	FUSION	0	0	MISSENSE, INFRAME, TRUNCATING MUTATIONS (PUTATIVE DRIVER)	0	0
THBS1	ALL	26	0.049904	AMPLIFICATION	0	0	DEEP DELETION	8	0.0153551	mRNA HIGH	18	0.0345489	mRNA LOW	0	0	FUSION	0	0	MISSENSE, INFRAME, TRUNCATING MUTATIONS (PUTATIVE DRIVER)	0	0
TIMP1	ALL	27	0.0518234	AMPLIFICATION	1	0.00191939	DEEP DELETION	2	0.00383877	mRNA HIGH	24	0.0460653	mRNA LOW	0	0	FUSION	0	0	MISSENSE, INFRAME, TRUNCATING MUTATIONS (PUTATIVE DRIVER)	0	0
TLR4	ALL	31	0.059501	AMPLIFICATION	0	0	DEEP DELETION	0	0	mRNA HIGH	31	0.059501	mRNA LOW	0	0	FUSION	0	0	MISSENSE, INFRAME, TRUNCATING MUTATIONS (PUTATIVE DRIVER)	0	0
TNC	ALL	21	0.0403071	AMPLIFICATION	0	0	DEEP DELETION	0	0	mRNA HIGH	21	0.0403071	mRNA LOW	0	0	FUSION	0	0	MISSENSE, INFRAME, TRUNCATING MUTATIONS (PUTATIVE DRIVER)	0	0
TNF	ALL	31	0.059501	AMPLIFICATION	3	0.00575816	DEEP DELETION	1	0.00191939	mRNA HIGH	27	0.0518234	mRNA LOW	0	0	FUSION	0	0	MISSENSE, INFRAME, TRUNCATING MUTATIONS (PUTATIVE DRIVER)	0	0
TP53	ALL	414	0.794626	AMPLIFICATION	0	0	DEEP DELETION	7	0.0134357	mRNA HIGH	12	0.0230326	mRNA LOW	85	0.163148	FUSION	0	0	MISSENSE, INFRAME, TRUNCATING MUTATIONS (PUTATIVE DRIVER)	310	0.59501
TSC2	ALL	38	0.0729367	AMPLIFICATION	0	0	DEEP DELETION	0	0	mRNA HIGH	34	0.0652591	mRNA LOW	1	0.00191939	FUSION	0	0	MISSENSE, INFRAME, TRUNCATING MUTATIONS (PUTATIVE DRIVER)	3	0.00575816
UBE2B	ALL	26	0.049904	AMPLIFICATION	0	0	DEEP DELETION	2	0.00383877	mRNA HIGH	20	0.0383877	mRNA LOW	4	0.00767754	FUSION	0	0	MISSENSE, INFRAME, TRUNCATING MUTATIONS (PUTATIVE DRIVER)	0	0
UCP2	ALL	30	0.0575816	AMPLIFICATION	1	0.00191939	DEEP DELETION	0	0	mRNA HIGH	29	0.0556622	mRNA LOW	0	0	FUSION	0	0	MISSENSE, INFRAME, TRUNCATING MUTATIONS (PUTATIVE DRIVER)	0	0
USF1	ALL	27	0.0518234	AMPLIFICATION	3	0.00575816	DEEP DELETION	0	0	mRNA HIGH	24	0.0460653	mRNA LOW	0	0	FUSION	0	0	MISSENSE, INFRAME, TRUNCATING MUTATIONS (PUTATIVE DRIVER)	0	0
VCAM1	ALL	27	0.0518234	AMPLIFICATION	0	0	DEEP DELETION	1	0.00191939	mRNA HIGH	26	0.049904	mRNA LOW	0	0	FUSION	0	0	MISSENSE, INFRAME, TRUNCATING MUTATIONS (PUTATIVE DRIVER)	0	0
VEGFA	ALL	31	0.059501	AMPLIFICATION	6	0.0115163	DEEP DELETION	0	0	mRNA HIGH	25	0.0479846	mRNA LOW	0	0	FUSION	0	0	MISSENSE, INFRAME, TRUNCATING MUTATIONS (PUTATIVE DRIVER)	0	0
VEGFC	ALL	35	0.0671785	AMPLIFICATION	0	0	DEEP DELETION	7	0.0134357	mRNA HIGH	28	0.0537428	mRNA LOW	0	0	FUSION	0	0	MISSENSE, INFRAME, TRUNCATING MUTATIONS (PUTATIVE DRIVER)	0	0
VHL	ALL	35	0.0671785	AMPLIFICATION	1	0.00191939	DEEP DELETION	0	0	mRNA HIGH	14	0.0268714	mRNA LOW	19	0.0364683	FUSION	0	0	MISSENSE, INFRAME, TRUNCATING MUTATIONS (PUTATIVE DRIVER)	1	0.00191939
VLDLR	ALL	33	0.0633397	AMPLIFICATION	2	0.00383877	DEEP DELETION	2	0.00383877	mRNA HIGH	29	0.0556622	mRNA LOW	0	0	FUSION	0	0	MISSENSE, INFRAME, TRUNCATING MUTATIONS (PUTATIVE DRIVER)	0	0

## Sheet: ST_6
Supplementary Table 6. Frequency of genetic alterations in the hypoxia-related genes of 163 individuals with esophageal adenocarcinma from the TCGA Pan-Cancer Atlas project (TCGA-ESCA-PanCancer).
GENE	TYPE	TOTAL	FREQUENCY	TYPE	TOTAL	FREQUENCY	TYPE	TOTAL	FREQUENCY	TYPE	TOTAL	FREQUENCY	TYPE	TOTAL	FREQUENCY	TYPE	TOTAL	FREQUENCY	TYPE	TOTAL	FREQUENCY
ACTN4	ALL	18	0.110429	AMPLIFICATION	7	0.0429448	DEEP DELETION	0	0	mRNA HIGH	9	0.0552147	mRNA LOW	1	0.00613497	FUSION	1	0.00613497	MISSENSE, INFRAME, TRUNCATING MUTATIONS (PUTATIVE DRIVER)	0	0
ADA	ALL	17	0.104294	AMPLIFICATION	8	0.0490798	DEEP DELETION	0	0	mRNA HIGH	9	0.0552147	mRNA LOW	0	0	FUSION	0	0	MISSENSE, INFRAME, TRUNCATING MUTATIONS (PUTATIVE DRIVER)	0	0
ADAM8	ALL	11	0.0674847	AMPLIFICATION	0	0	DEEP DELETION	2	0.0122699	mRNA HIGH	9	0.0552147	mRNA LOW	0	0	FUSION	0	0	MISSENSE, INFRAME, TRUNCATING MUTATIONS (PUTATIVE DRIVER)	0	0
ADM	ALL	9	0.0552147	AMPLIFICATION	1	0.00613497	DEEP DELETION	0	0	mRNA HIGH	8	0.0490798	mRNA LOW	0	0	FUSION	0	0	MISSENSE, INFRAME, TRUNCATING MUTATIONS (PUTATIVE DRIVER)	0	0
ADORA1	ALL	11	0.0674847	AMPLIFICATION	1	0.00613497	DEEP DELETION	0	0	mRNA HIGH	10	0.0613497	mRNA LOW	0	0	FUSION	0	0	MISSENSE, INFRAME, TRUNCATING MUTATIONS (PUTATIVE DRIVER)	0	0
ADRA1B	ALL	9	0.0552147	AMPLIFICATION	0	0	DEEP DELETION	0	0	mRNA HIGH	9	0.0552147	mRNA LOW	0	0	FUSION	0	0	MISSENSE, INFRAME, TRUNCATING MUTATIONS (PUTATIVE DRIVER)	0	0
AKT1	ALL	20	0.122699	AMPLIFICATION	2	0.0122699	DEEP DELETION	1	0.00613497	mRNA HIGH	13	0.0797546	mRNA LOW	4	0.0245399	FUSION	0	0	MISSENSE, INFRAME, TRUNCATING MUTATIONS (PUTATIVE DRIVER)	0	0
AKT2	ALL	18	0.110429	AMPLIFICATION	2	0.0122699	DEEP DELETION	0	0	mRNA HIGH	12	0.0736196	mRNA LOW	4	0.0245399	FUSION	0	0	MISSENSE, INFRAME, TRUNCATING MUTATIONS (PUTATIVE DRIVER)	0	0
AKT3	ALL	16	0.0981595	AMPLIFICATION	3	0.0184049	DEEP DELETION	0	0	mRNA HIGH	13	0.0797546	mRNA LOW	0	0	FUSION	0	0	MISSENSE, INFRAME, TRUNCATING MUTATIONS (PUTATIVE DRIVER)	0	0
ALAS2	ALL	5	0.0306748	AMPLIFICATION	0	0	DEEP DELETION	3	0.0184049	mRNA HIGH	2	0.0122699	mRNA LOW	0	0	FUSION	0	0	MISSENSE, INFRAME, TRUNCATING MUTATIONS (PUTATIVE DRIVER)	0	0
ALDOA	ALL	15	0.0920245	AMPLIFICATION	2	0.0122699	DEEP DELETION	0	0	mRNA HIGH	12	0.0736196	mRNA LOW	0	0	FUSION	1	0.00613497	MISSENSE, INFRAME, TRUNCATING MUTATIONS (PUTATIVE DRIVER)	0	0
ALDOB	ALL	6	0.0368098	AMPLIFICATION	1	0.00613497	DEEP DELETION	0	0	mRNA HIGH	5	0.0306748	mRNA LOW	0	0	FUSION	0	0	MISSENSE, INFRAME, TRUNCATING MUTATIONS (PUTATIVE DRIVER)	0	0
ALDOC	ALL	14	0.0858896	AMPLIFICATION	3	0.0184049	DEEP DELETION	0	0	mRNA HIGH	11	0.0674847	mRNA LOW	0	0	FUSION	0	0	MISSENSE, INFRAME, TRUNCATING MUTATIONS (PUTATIVE DRIVER)	0	0
ANG	ALL	11	0.0674847	AMPLIFICATION	2	0.0122699	DEEP DELETION	0	0	mRNA HIGH	9	0.0552147	mRNA LOW	0	0	FUSION	0	0	MISSENSE, INFRAME, TRUNCATING MUTATIONS (PUTATIVE DRIVER)	0	0
ANGPT1	ALL	17	0.104294	AMPLIFICATION	12	0.0736196	DEEP DELETION	0	0	mRNA HIGH	5	0.0306748	mRNA LOW	0	0	FUSION	0	0	MISSENSE, INFRAME, TRUNCATING MUTATIONS (PUTATIVE DRIVER)	0	0
ANGPT2	ALL	12	0.0736196	AMPLIFICATION	5	0.0306748	DEEP DELETION	5	0.0306748	mRNA HIGH	2	0.0122699	mRNA LOW	0	0	FUSION	0	0	MISSENSE, INFRAME, TRUNCATING MUTATIONS (PUTATIVE DRIVER)	0	0
ANGPT4	ALL	11	0.0674847	AMPLIFICATION	2	0.0122699	DEEP DELETION	0	0	mRNA HIGH	9	0.0552147	mRNA LOW	0	0	FUSION	0	0	MISSENSE, INFRAME, TRUNCATING MUTATIONS (PUTATIVE DRIVER)	0	0
ANGPTL4	ALL	9	0.0552147	AMPLIFICATION	1	0.00613497	DEEP DELETION	2	0.0122699	mRNA HIGH	6	0.0368098	mRNA LOW	0	0	FUSION	0	0	MISSENSE, INFRAME, TRUNCATING MUTATIONS (PUTATIVE DRIVER)	0	0
AQP1	ALL	6	0.0368098	AMPLIFICATION	4	0.0245399	DEEP DELETION	0	0	mRNA HIGH	2	0.0122699	mRNA LOW	0	0	FUSION	0	0	MISSENSE, INFRAME, TRUNCATING MUTATIONS (PUTATIVE DRIVER)	0	0
ARG2	ALL	8	0.0490798	AMPLIFICATION	2	0.0122699	DEEP DELETION	0	0	mRNA HIGH	6	0.0368098	mRNA LOW	0	0	FUSION	0	0	MISSENSE, INFRAME, TRUNCATING MUTATIONS (PUTATIVE DRIVER)	0	0
ARNT	ALL	33	0.202454	AMPLIFICATION	6	0.0368098	DEEP DELETION	1	0.00613497	mRNA HIGH	25	0.153374	mRNA LOW	1	0.00613497	FUSION	0	0	MISSENSE, INFRAME, TRUNCATING MUTATIONS (PUTATIVE DRIVER)	0	0
ARNT2	ALL	8	0.0490798	AMPLIFICATION	3	0.0184049	DEEP DELETION	1	0.00613497	mRNA HIGH	4	0.0245399	mRNA LOW	0	0	FUSION	0	0	MISSENSE, INFRAME, TRUNCATING MUTATIONS (PUTATIVE DRIVER)	0	0
ASCL2	ALL	7	0.0429448	AMPLIFICATION	0	0	DEEP DELETION	3	0.0184049	mRNA HIGH	4	0.0245399	mRNA LOW	0	0	FUSION	0	0	MISSENSE, INFRAME, TRUNCATING MUTATIONS (PUTATIVE DRIVER)	0	0
ATP1A1	ALL	17	0.104294	AMPLIFICATION	4	0.0245399	DEEP DELETION	4	0.0245399	mRNA HIGH	9	0.0552147	mRNA LOW	0	0	FUSION	0	0	MISSENSE, INFRAME, TRUNCATING MUTATIONS (PUTATIVE DRIVER)	0	0
ATP1A2	ALL	12	0.0736196	AMPLIFICATION	6	0.0368098	DEEP DELETION	0	0	mRNA HIGH	6	0.0368098	mRNA LOW	0	0	FUSION	0	0	MISSENSE, INFRAME, TRUNCATING MUTATIONS (PUTATIVE DRIVER)	0	0
ATP1B1	ALL	20	0.122699	AMPLIFICATION	9	0.0552147	DEEP DELETION	0	0	mRNA HIGH	11	0.0674847	mRNA LOW	0	0	FUSION	0	0	MISSENSE, INFRAME, TRUNCATING MUTATIONS (PUTATIVE DRIVER)	0	0
BACH1	ALL	5	0.0306748	AMPLIFICATION	0	0	DEEP DELETION	2	0.0122699	mRNA HIGH	3	0.0184049	mRNA LOW	0	0	FUSION	0	0	MISSENSE, INFRAME, TRUNCATING MUTATIONS (PUTATIVE DRIVER)	0	0
BAD	ALL	12	0.0736196	AMPLIFICATION	0	0	DEEP DELETION	0	0	mRNA HIGH	11	0.0674847	mRNA LOW	0	0	FUSION	1	0.00613497	MISSENSE, INFRAME, TRUNCATING MUTATIONS (PUTATIVE DRIVER)	0	0
BBC3	ALL	16	0.0981595	AMPLIFICATION	0	0	DEEP DELETION	0	0	mRNA HIGH	16	0.0981595	mRNA LOW	0	0	FUSION	0	0	MISSENSE, INFRAME, TRUNCATING MUTATIONS (PUTATIVE DRIVER)	0	0
BCL2	ALL	13	0.0797546	AMPLIFICATION	2	0.0122699	DEEP DELETION	7	0.0429448	mRNA HIGH	4	0.0245399	mRNA LOW	0	0	FUSION	0	0	MISSENSE, INFRAME, TRUNCATING MUTATIONS (PUTATIVE DRIVER)	0	0
BNIP3	ALL	8	0.0490798	AMPLIFICATION	0	0	DEEP DELETION	1	0.00613497	mRNA HIGH	7	0.0429448	mRNA LOW	0	0	FUSION	0	0	MISSENSE, INFRAME, TRUNCATING MUTATIONS (PUTATIVE DRIVER)	0	0
CAMK2A	ALL	12	0.0736196	AMPLIFICATION	1	0.00613497	DEEP DELETION	0	0	mRNA HIGH	11	0.0674847	mRNA LOW	0	0	FUSION	0	0	MISSENSE, INFRAME, TRUNCATING MUTATIONS (PUTATIVE DRIVER)	0	0
CAMK2B	ALL	12	0.0736196	AMPLIFICATION	4	0.0245399	DEEP DELETION	1	0.00613497	mRNA HIGH	7	0.0429448	mRNA LOW	0	0	FUSION	0	0	MISSENSE, INFRAME, TRUNCATING MUTATIONS (PUTATIVE DRIVER)	0	0
CAMK2D	ALL	16	0.0981595	AMPLIFICATION	1	0.00613497	DEEP DELETION	0	0	mRNA HIGH	7	0.0429448	mRNA LOW	8	0.0490798	FUSION	0	0	MISSENSE, INFRAME, TRUNCATING MUTATIONS (PUTATIVE DRIVER)	0	0
CAMK2G	ALL	8	0.0490798	AMPLIFICATION	1	0.00613497	DEEP DELETION	2	0.0122699	mRNA HIGH	5	0.0306748	mRNA LOW	0	0	FUSION	0	0	MISSENSE, INFRAME, TRUNCATING MUTATIONS (PUTATIVE DRIVER)	0	0
CASR	ALL	7	0.0429448	AMPLIFICATION	4	0.0245399	DEEP DELETION	1	0.00613497	mRNA HIGH	2	0.0122699	mRNA LOW	0	0	FUSION	0	0	MISSENSE, INFRAME, TRUNCATING MUTATIONS (PUTATIVE DRIVER)	0	0
CAV1	ALL	28	0.171779	AMPLIFICATION	5	0.0306748	DEEP DELETION	2	0.0122699	mRNA HIGH	21	0.128834	mRNA LOW	0	0	FUSION	0	0	MISSENSE, INFRAME, TRUNCATING MUTATIONS (PUTATIVE DRIVER)	0	0
CCL2	ALL	11	0.0674847	AMPLIFICATION	2	0.0122699	DEEP DELETION	2	0.0122699	mRNA HIGH	7	0.0429448	mRNA LOW	0	0	FUSION	0	0	MISSENSE, INFRAME, TRUNCATING MUTATIONS (PUTATIVE DRIVER)	0	0
CD24	ALL	0	0	AMPLIFICATION	0	0	DEEP DELETION	0	0	mRNA HIGH	0	0	mRNA LOW	0	0	FUSION	0	0	MISSENSE, INFRAME, TRUNCATING MUTATIONS (PUTATIVE DRIVER)	0	0
CDH1	ALL	18	0.110429	AMPLIFICATION	4	0.0245399	DEEP DELETION	3	0.0184049	mRNA HIGH	8	0.0490798	mRNA LOW	3	0.0184049	FUSION	0	0	MISSENSE, INFRAME, TRUNCATING MUTATIONS (PUTATIVE DRIVER)	0	0
CDKN1A	ALL	7	0.0429448	AMPLIFICATION	1	0.00613497	DEEP DELETION	0	0	mRNA HIGH	6	0.0368098	mRNA LOW	0	0	FUSION	0	0	MISSENSE, INFRAME, TRUNCATING MUTATIONS (PUTATIVE DRIVER)	0	0
CDKN1B	ALL	15	0.0920245	AMPLIFICATION	1	0.00613497	DEEP DELETION	2	0.0122699	mRNA HIGH	12	0.0736196	mRNA LOW	0	0	FUSION	0	0	MISSENSE, INFRAME, TRUNCATING MUTATIONS (PUTATIVE DRIVER)	0	0
CHRNA7	ALL	9	0.0552147	AMPLIFICATION	2	0.0122699	DEEP DELETION	0	0	mRNA HIGH	7	0.0429448	mRNA LOW	0	0	FUSION	0	0	MISSENSE, INFRAME, TRUNCATING MUTATIONS (PUTATIVE DRIVER)	0	0
CHRNB2	ALL	11	0.0674847	AMPLIFICATION	5	0.0306748	DEEP DELETION	1	0.00613497	mRNA HIGH	5	0.0306748	mRNA LOW	0	0	FUSION	0	0	MISSENSE, INFRAME, TRUNCATING MUTATIONS (PUTATIVE DRIVER)	0	0
CIAO3	ALL	17	0.104294	AMPLIFICATION	0	0	DEEP DELETION	5	0.0306748	mRNA HIGH	7	0.0429448	mRNA LOW	5	0.0306748	FUSION	0	0	MISSENSE, INFRAME, TRUNCATING MUTATIONS (PUTATIVE DRIVER)	0	0
CITED2	ALL	3	0.0184049	AMPLIFICATION	1	0.00613497	DEEP DELETION	0	0	mRNA HIGH	2	0.0122699	mRNA LOW	0	0	FUSION	0	0	MISSENSE, INFRAME, TRUNCATING MUTATIONS (PUTATIVE DRIVER)	0	0
CLDN3	ALL	9	0.0552147	AMPLIFICATION	3	0.0184049	DEEP DELETION	0	0	mRNA HIGH	6	0.0368098	mRNA LOW	0	0	FUSION	0	0	MISSENSE, INFRAME, TRUNCATING MUTATIONS (PUTATIVE DRIVER)	0	0
COPS5	ALL	36	0.220859	AMPLIFICATION	5	0.0306748	DEEP DELETION	0	0	mRNA HIGH	31	0.190184	mRNA LOW	0	0	FUSION	0	0	MISSENSE, INFRAME, TRUNCATING MUTATIONS (PUTATIVE DRIVER)	0	0
CREBBP	ALL	14	0.0858896	AMPLIFICATION	0	0	DEEP DELETION	0	0	mRNA HIGH	6	0.0368098	mRNA LOW	1	0.00613497	FUSION	1	0.00613497	MISSENSE, INFRAME, TRUNCATING MUTATIONS (PUTATIVE DRIVER)	6	0.0368098
CUL2	ALL	31	0.190184	AMPLIFICATION	6	0.0368098	DEEP DELETION	0	0	mRNA HIGH	23	0.141104	mRNA LOW	2	0.0122699	FUSION	0	0	MISSENSE, INFRAME, TRUNCATING MUTATIONS (PUTATIVE DRIVER)	0	0
CXCR4	ALL	4	0.0245399	AMPLIFICATION	1	0.00613497	DEEP DELETION	0	0	mRNA HIGH	3	0.0184049	mRNA LOW	0	0	FUSION	0	0	MISSENSE, INFRAME, TRUNCATING MUTATIONS (PUTATIVE DRIVER)	0	0
CYBB	ALL	13	0.0797546	AMPLIFICATION	1	0.00613497	DEEP DELETION	6	0.0368098	mRNA HIGH	6	0.0368098	mRNA LOW	0	0	FUSION	0	0	MISSENSE, INFRAME, TRUNCATING MUTATIONS (PUTATIVE DRIVER)	0	0
CYP1A1	ALL	4	0.0245399	AMPLIFICATION	2	0.0122699	DEEP DELETION	1	0.00613497	mRNA HIGH	1	0.00613497	mRNA LOW	0	0	FUSION	0	0	MISSENSE, INFRAME, TRUNCATING MUTATIONS (PUTATIVE DRIVER)	0	0
DDIT4	ALL	8	0.0490798	AMPLIFICATION	1	0.00613497	DEEP DELETION	1	0.00613497	mRNA HIGH	6	0.0368098	mRNA LOW	0	0	FUSION	0	0	MISSENSE, INFRAME, TRUNCATING MUTATIONS (PUTATIVE DRIVER)	0	0
DPP4	ALL	8	0.0490798	AMPLIFICATION	1	0.00613497	DEEP DELETION	0	0	mRNA HIGH	7	0.0429448	mRNA LOW	0	0	FUSION	0	0	MISSENSE, INFRAME, TRUNCATING MUTATIONS (PUTATIVE DRIVER)	0	0
E2F1	ALL	17	0.104294	AMPLIFICATION	3	0.0184049	DEEP DELETION	0	0	mRNA HIGH	14	0.0858896	mRNA LOW	0	0	FUSION	0	0	MISSENSE, INFRAME, TRUNCATING MUTATIONS (PUTATIVE DRIVER)	0	0
EDN1	ALL	9	0.0552147	AMPLIFICATION	3	0.0184049	DEEP DELETION	2	0.0122699	mRNA HIGH	4	0.0245399	mRNA LOW	0	0	FUSION	0	0	MISSENSE, INFRAME, TRUNCATING MUTATIONS (PUTATIVE DRIVER)	0	0
EDNRA	ALL	14	0.0858896	AMPLIFICATION	3	0.0184049	DEEP DELETION	0	0	mRNA HIGH	11	0.0674847	mRNA LOW	0	0	FUSION	0	0	MISSENSE, INFRAME, TRUNCATING MUTATIONS (PUTATIVE DRIVER)	0	0
EDNRB	ALL	15	0.0920245	AMPLIFICATION	1	0.00613497	DEEP DELETION	0	0	mRNA HIGH	14	0.0858896	mRNA LOW	0	0	FUSION	0	0	MISSENSE, INFRAME, TRUNCATING MUTATIONS (PUTATIVE DRIVER)	0	0
EGF	ALL	2	0.0122699	AMPLIFICATION	0	0	DEEP DELETION	0	0	mRNA HIGH	2	0.0122699	mRNA LOW	0	0	FUSION	0	0	MISSENSE, INFRAME, TRUNCATING MUTATIONS (PUTATIVE DRIVER)	0	0
EGFR	ALL	51	0.312883	AMPLIFICATION	21	0.128834	DEEP DELETION	1	0.00613497	mRNA HIGH	29	0.177914	mRNA LOW	0	0	FUSION	0	0	MISSENSE, INFRAME, TRUNCATING MUTATIONS (PUTATIVE DRIVER)	0	0
EGLN1	ALL	24	0.147239	AMPLIFICATION	3	0.0184049	DEEP DELETION	0	0	mRNA HIGH	19	0.116564	mRNA LOW	2	0.0122699	FUSION	0	0	MISSENSE, INFRAME, TRUNCATING MUTATIONS (PUTATIVE DRIVER)	0	0
EGLN2	ALL	17	0.104294	AMPLIFICATION	1	0.00613497	DEEP DELETION	0	0	mRNA HIGH	11	0.0674847	mRNA LOW	5	0.0306748	FUSION	0	0	MISSENSE, INFRAME, TRUNCATING MUTATIONS (PUTATIVE DRIVER)	0	0
EGLN3	ALL	17	0.104294	AMPLIFICATION	4	0.0245399	DEEP DELETION	0	0	mRNA HIGH	13	0.0797546	mRNA LOW	0	0	FUSION	0	0	MISSENSE, INFRAME, TRUNCATING MUTATIONS (PUTATIVE DRIVER)	0	0
EIF4E	ALL	11	0.0674847	AMPLIFICATION	0	0	DEEP DELETION	0	0	mRNA HIGH	6	0.0368098	mRNA LOW	5	0.0306748	FUSION	0	0	MISSENSE, INFRAME, TRUNCATING MUTATIONS (PUTATIVE DRIVER)	0	0
EIF4E1B	ALL	0	0	AMPLIFICATION	0	0	DEEP DELETION	0	0	mRNA HIGH	0	0	mRNA LOW	0	0	FUSION	0	0	MISSENSE, INFRAME, TRUNCATING MUTATIONS (PUTATIVE DRIVER)	0	0
EIF4E2	ALL	16	0.0981595	AMPLIFICATION	1	0.00613497	DEEP DELETION	4	0.0245399	mRNA HIGH	4	0.0245399	mRNA LOW	7	0.0429448	FUSION	0	0	MISSENSE, INFRAME, TRUNCATING MUTATIONS (PUTATIVE DRIVER)	0	0
EIF4EBP1	ALL	22	0.134969	AMPLIFICATION	11	0.0674847	DEEP DELETION	2	0.0122699	mRNA HIGH	9	0.0552147	mRNA LOW	0	0	FUSION	0	0	MISSENSE, INFRAME, TRUNCATING MUTATIONS (PUTATIVE DRIVER)	0	0
ELF2	ALL	10	0.0613497	AMPLIFICATION	1	0.00613497	DEEP DELETION	0	0	mRNA HIGH	7	0.0429448	mRNA LOW	2	0.0122699	FUSION	0	0	MISSENSE, INFRAME, TRUNCATING MUTATIONS (PUTATIVE DRIVER)	0	0
ELOB	ALL	14	0.0858896	AMPLIFICATION	1	0.00613497	DEEP DELETION	2	0.0122699	mRNA HIGH	11	0.0674847	mRNA LOW	0	0	FUSION	0	0	MISSENSE, INFRAME, TRUNCATING MUTATIONS (PUTATIVE DRIVER)	0	0
ELOC	ALL	25	0.153374	AMPLIFICATION	3	0.0184049	DEEP DELETION	0	0	mRNA HIGH	22	0.134969	mRNA LOW	0	0	FUSION	0	0	MISSENSE, INFRAME, TRUNCATING MUTATIONS (PUTATIVE DRIVER)	0	0
ENG	ALL	10	0.0613497	AMPLIFICATION	3	0.0184049	DEEP DELETION	0	0	mRNA HIGH	7	0.0429448	mRNA LOW	0	0	FUSION	0	0	MISSENSE, INFRAME, TRUNCATING MUTATIONS (PUTATIVE DRIVER)	0	0
ENO1	ALL	10	0.0613497	AMPLIFICATION	4	0.0245399	DEEP DELETION	1	0.00613497	mRNA HIGH	5	0.0306748	mRNA LOW	0	0	FUSION	0	0	MISSENSE, INFRAME, TRUNCATING MUTATIONS (PUTATIVE DRIVER)	0	0
ENO2	ALL	13	0.0797546	AMPLIFICATION	2	0.0122699	DEEP DELETION	1	0.00613497	mRNA HIGH	10	0.0613497	mRNA LOW	0	0	FUSION	0	0	MISSENSE, INFRAME, TRUNCATING MUTATIONS (PUTATIVE DRIVER)	0	0
ENO3	ALL	9	0.0552147	AMPLIFICATION	0	0	DEEP DELETION	2	0.0122699	mRNA HIGH	7	0.0429448	mRNA LOW	0	0	FUSION	0	0	MISSENSE, INFRAME, TRUNCATING MUTATIONS (PUTATIVE DRIVER)	0	0
ENO4	ALL	0	0	AMPLIFICATION	0	0	DEEP DELETION	0	0	mRNA HIGH	0	0	mRNA LOW	0	0	FUSION	0	0	MISSENSE, INFRAME, TRUNCATING MUTATIONS (PUTATIVE DRIVER)	0	0
EP300	ALL	17	0.104294	AMPLIFICATION	0	0	DEEP DELETION	0	0	mRNA HIGH	10	0.0613497	mRNA LOW	3	0.0184049	FUSION	0	0	MISSENSE, INFRAME, TRUNCATING MUTATIONS (PUTATIVE DRIVER)	4	0.0245399
EPAS1	ALL	5	0.0306748	AMPLIFICATION	0	0	DEEP DELETION	0	0	mRNA HIGH	5	0.0306748	mRNA LOW	0	0	FUSION	0	0	MISSENSE, INFRAME, TRUNCATING MUTATIONS (PUTATIVE DRIVER)	0	0
EPO	ALL	26	0.159509	AMPLIFICATION	15	0.0920245	DEEP DELETION	0	0	mRNA HIGH	11	0.0674847	mRNA LOW	0	0	FUSION	0	0	MISSENSE, INFRAME, TRUNCATING MUTATIONS (PUTATIVE DRIVER)	0	0
ERBB2	ALL	59	0.361963	AMPLIFICATION	24	0.147239	DEEP DELETION	0	0	mRNA HIGH	26	0.159509	mRNA LOW	0	0	FUSION	4	0.0245399	MISSENSE, INFRAME, TRUNCATING MUTATIONS (PUTATIVE DRIVER)	5	0.0306748
ETS1	ALL	6	0.0368098	AMPLIFICATION	2	0.0122699	DEEP DELETION	1	0.00613497	mRNA HIGH	3	0.0184049	mRNA LOW	0	0	FUSION	0	0	MISSENSE, INFRAME, TRUNCATING MUTATIONS (PUTATIVE DRIVER)	0	0
FLT1	ALL	16	0.0981595	AMPLIFICATION	4	0.0245399	DEEP DELETION	0	0	mRNA HIGH	12	0.0736196	mRNA LOW	0	0	FUSION	0	0	MISSENSE, INFRAME, TRUNCATING MUTATIONS (PUTATIVE DRIVER)	0	0
GAPDH	ALL	18	0.110429	AMPLIFICATION	2	0.0122699	DEEP DELETION	0	0	mRNA HIGH	16	0.0981595	mRNA LOW	0	0	FUSION	0	0	MISSENSE, INFRAME, TRUNCATING MUTATIONS (PUTATIVE DRIVER)	0	0
GATA6	ALL	35	0.214724	AMPLIFICATION	16	0.0981595	DEEP DELETION	2	0.0122699	mRNA HIGH	17	0.104294	mRNA LOW	0	0	FUSION	0	0	MISSENSE, INFRAME, TRUNCATING MUTATIONS (PUTATIVE DRIVER)	0	0
HBB	ALL	2	0.0122699	AMPLIFICATION	0	0	DEEP DELETION	0	0	mRNA HIGH	2	0.0122699	mRNA LOW	0	0	FUSION	0	0	MISSENSE, INFRAME, TRUNCATING MUTATIONS (PUTATIVE DRIVER)	0	0
HBG2	ALL	3	0.0184049	AMPLIFICATION	0	0	DEEP DELETION	0	0	mRNA HIGH	3	0.0184049	mRNA LOW	0	0	FUSION	0	0	MISSENSE, INFRAME, TRUNCATING MUTATIONS (PUTATIVE DRIVER)	0	0
HIF1A	ALL	4	0.0245399	AMPLIFICATION	1	0.00613497	DEEP DELETION	0	0	mRNA HIGH	3	0.0184049	mRNA LOW	0	0	FUSION	0	0	MISSENSE, INFRAME, TRUNCATING MUTATIONS (PUTATIVE DRIVER)	0	0
HIF3A	ALL	13	0.0797546	AMPLIFICATION	0	0	DEEP DELETION	0	0	mRNA HIGH	13	0.0797546	mRNA LOW	0	0	FUSION	0	0	MISSENSE, INFRAME, TRUNCATING MUTATIONS (PUTATIVE DRIVER)	0	0
HK1	ALL	9	0.0552147	AMPLIFICATION	1	0.00613497	DEEP DELETION	1	0.00613497	mRNA HIGH	7	0.0429448	mRNA LOW	0	0	FUSION	0	0	MISSENSE, INFRAME, TRUNCATING MUTATIONS (PUTATIVE DRIVER)	0	0
HK2	ALL	13	0.0797546	AMPLIFICATION	1	0.00613497	DEEP DELETION	0	0	mRNA HIGH	11	0.0674847	mRNA LOW	0	0	FUSION	1	0.00613497	MISSENSE, INFRAME, TRUNCATING MUTATIONS (PUTATIVE DRIVER)	0	0
HK3	ALL	6	0.0368098	AMPLIFICATION	1	0.00613497	DEEP DELETION	0	0	mRNA HIGH	5	0.0306748	mRNA LOW	0	0	FUSION	0	0	MISSENSE, INFRAME, TRUNCATING MUTATIONS (PUTATIVE DRIVER)	0	0
HKDC1	ALL	8	0.0490798	AMPLIFICATION	0	0	DEEP DELETION	1	0.00613497	mRNA HIGH	7	0.0429448	mRNA LOW	0	0	FUSION	0	0	MISSENSE, INFRAME, TRUNCATING MUTATIONS (PUTATIVE DRIVER)	0	0
HMBS	ALL	16	0.0981595	AMPLIFICATION	0	0	DEEP DELETION	1	0.00613497	mRNA HIGH	13	0.0797546	mRNA LOW	2	0.0122699	FUSION	0	0	MISSENSE, INFRAME, TRUNCATING MUTATIONS (PUTATIVE DRIVER)	0	0
HMOX1	ALL	10	0.0613497	AMPLIFICATION	1	0.00613497	DEEP DELETION	0	0	mRNA HIGH	9	0.0552147	mRNA LOW	0	0	FUSION	0	0	MISSENSE, INFRAME, TRUNCATING MUTATIONS (PUTATIVE DRIVER)	0	0
HMOX2	ALL	6	0.0368098	AMPLIFICATION	0	0	DEEP DELETION	0	0	mRNA HIGH	6	0.0368098	mRNA LOW	0	0	FUSION	0	0	MISSENSE, INFRAME, TRUNCATING MUTATIONS (PUTATIVE DRIVER)	0	0
HSP90B1	ALL	17	0.104294	AMPLIFICATION	1	0.00613497	DEEP DELETION	0	0	mRNA HIGH	13	0.0797546	mRNA LOW	3	0.0184049	FUSION	0	0	MISSENSE, INFRAME, TRUNCATING MUTATIONS (PUTATIVE DRIVER)	0	0
HYOU1	ALL	14	0.0858896	AMPLIFICATION	0	0	DEEP DELETION	1	0.00613497	mRNA HIGH	13	0.0797546	mRNA LOW	0	0	FUSION	0	0	MISSENSE, INFRAME, TRUNCATING MUTATIONS (PUTATIVE DRIVER)	0	0
IFNG	ALL	13	0.0797546	AMPLIFICATION	6	0.0368098	DEEP DELETION	0	0	mRNA HIGH	7	0.0429448	mRNA LOW	0	0	FUSION	0	0	MISSENSE, INFRAME, TRUNCATING MUTATIONS (PUTATIVE DRIVER)	0	0
IFNGR1	ALL	12	0.0736196	AMPLIFICATION	4	0.0245399	DEEP DELETION	0	0	mRNA HIGH	8	0.0490798	mRNA LOW	0	0	FUSION	0	0	MISSENSE, INFRAME, TRUNCATING MUTATIONS (PUTATIVE DRIVER)	0	0
IFNGR2	ALL	5	0.0306748	AMPLIFICATION	0	0	DEEP DELETION	0	0	mRNA HIGH	5	0.0306748	mRNA LOW	0	0	FUSION	0	0	MISSENSE, INFRAME, TRUNCATING MUTATIONS (PUTATIVE DRIVER)	0	0
IGF1	ALL	6	0.0368098	AMPLIFICATION	1	0.00613497	DEEP DELETION	0	0	mRNA HIGH	5	0.0306748	mRNA LOW	0	0	FUSION	0	0	MISSENSE, INFRAME, TRUNCATING MUTATIONS (PUTATIVE DRIVER)	0	0
IGF1R	ALL	12	0.0736196	AMPLIFICATION	4	0.0245399	DEEP DELETION	0	0	mRNA HIGH	8	0.0490798	mRNA LOW	0	0	FUSION	0	0	MISSENSE, INFRAME, TRUNCATING MUTATIONS (PUTATIVE DRIVER)	0	0
IGFBP1	ALL	21	0.128834	AMPLIFICATION	4	0.0245399	DEEP DELETION	1	0.00613497	mRNA HIGH	16	0.0981595	mRNA LOW	0	0	FUSION	0	0	MISSENSE, INFRAME, TRUNCATING MUTATIONS (PUTATIVE DRIVER)	0	0
IGFBP2	ALL	9	0.0552147	AMPLIFICATION	0	0	DEEP DELETION	1	0.00613497	mRNA HIGH	8	0.0490798	mRNA LOW	0	0	FUSION	0	0	MISSENSE, INFRAME, TRUNCATING MUTATIONS (PUTATIVE DRIVER)	0	0
IL1A	ALL	11	0.0674847	AMPLIFICATION	4	0.0245399	DEEP DELETION	0	0	mRNA HIGH	7	0.0429448	mRNA LOW	0	0	FUSION	0	0	MISSENSE, INFRAME, TRUNCATING MUTATIONS (PUTATIVE DRIVER)	0	0
IL1B	ALL	9	0.0552147	AMPLIFICATION	4	0.0245399	DEEP DELETION	0	0	mRNA HIGH	5	0.0306748	mRNA LOW	0	0	FUSION	0	0	MISSENSE, INFRAME, TRUNCATING MUTATIONS (PUTATIVE DRIVER)	0	0
IL6	ALL	10	0.0613497	AMPLIFICATION	7	0.0429448	DEEP DELETION	0	0	mRNA HIGH	3	0.0184049	mRNA LOW	0	0	FUSION	0	0	MISSENSE, INFRAME, TRUNCATING MUTATIONS (PUTATIVE DRIVER)	0	0
IL6R	ALL	20	0.122699	AMPLIFICATION	7	0.0429448	DEEP DELETION	1	0.00613497	mRNA HIGH	12	0.0736196	mRNA LOW	0	0	FUSION	0	0	MISSENSE, INFRAME, TRUNCATING MUTATIONS (PUTATIVE DRIVER)	0	0
INS	ALL	3	0.0184049	AMPLIFICATION	0	0	DEEP DELETION	3	0.0184049	mRNA HIGH	0	0	mRNA LOW	0	0	FUSION	0	0	MISSENSE, INFRAME, TRUNCATING MUTATIONS (PUTATIVE DRIVER)	0	0
INSR	ALL	9	0.0552147	AMPLIFICATION	2	0.0122699	DEEP DELETION	4	0.0245399	mRNA HIGH	3	0.0184049	mRNA LOW	0	0	FUSION	0	0	MISSENSE, INFRAME, TRUNCATING MUTATIONS (PUTATIVE DRIVER)	0	0
ITPR1	ALL	12	0.0736196	AMPLIFICATION	0	0	DEEP DELETION	2	0.0122699	mRNA HIGH	10	0.0613497	mRNA LOW	0	0	FUSION	0	0	MISSENSE, INFRAME, TRUNCATING MUTATIONS (PUTATIVE DRIVER)	0	0
ITPR2	ALL	18	0.110429	AMPLIFICATION	8	0.0490798	DEEP DELETION	1	0.00613497	mRNA HIGH	9	0.0552147	mRNA LOW	0	0	FUSION	0	0	MISSENSE, INFRAME, TRUNCATING MUTATIONS (PUTATIVE DRIVER)	0	0
KCNK3	ALL	7	0.0429448	AMPLIFICATION	1	0.00613497	DEEP DELETION	0	0	mRNA HIGH	6	0.0368098	mRNA LOW	0	0	FUSION	0	0	MISSENSE, INFRAME, TRUNCATING MUTATIONS (PUTATIVE DRIVER)	0	0
KCNMA1	ALL	6	0.0368098	AMPLIFICATION	1	0.00613497	DEEP DELETION	1	0.00613497	mRNA HIGH	4	0.0245399	mRNA LOW	0	0	FUSION	0	0	MISSENSE, INFRAME, TRUNCATING MUTATIONS (PUTATIVE DRIVER)	0	0
LDHA	ALL	9	0.0552147	AMPLIFICATION	1	0.00613497	DEEP DELETION	0	0	mRNA HIGH	8	0.0490798	mRNA LOW	0	0	FUSION	0	0	MISSENSE, INFRAME, TRUNCATING MUTATIONS (PUTATIVE DRIVER)	0	0
LDHAL6A	ALL	5	0.0306748	AMPLIFICATION	1	0.00613497	DEEP DELETION	0	0	mRNA HIGH	4	0.0245399	mRNA LOW	0	0	FUSION	0	0	MISSENSE, INFRAME, TRUNCATING MUTATIONS (PUTATIVE DRIVER)	0	0
LDHAL6B	ALL	10	0.0613497	AMPLIFICATION	0	0	DEEP DELETION	1	0.00613497	mRNA HIGH	9	0.0552147	mRNA LOW	0	0	FUSION	0	0	MISSENSE, INFRAME, TRUNCATING MUTATIONS (PUTATIVE DRIVER)	0	0
LDHB	ALL	14	0.0858896	AMPLIFICATION	4	0.0245399	DEEP DELETION	1	0.00613497	mRNA HIGH	9	0.0552147	mRNA LOW	0	0	FUSION	0	0	MISSENSE, INFRAME, TRUNCATING MUTATIONS (PUTATIVE DRIVER)	0	0
LDHC	ALL	13	0.0797546	AMPLIFICATION	1	0.00613497	DEEP DELETION	0	0	mRNA HIGH	12	0.0736196	mRNA LOW	0	0	FUSION	0	0	MISSENSE, INFRAME, TRUNCATING MUTATIONS (PUTATIVE DRIVER)	0	0
LMNA	ALL	14	0.0858896	AMPLIFICATION	4	0.0245399	DEEP DELETION	0	0	mRNA HIGH	10	0.0613497	mRNA LOW	0	0	FUSION	0	0	MISSENSE, INFRAME, TRUNCATING MUTATIONS (PUTATIVE DRIVER)	0	0
LTBR	ALL	16	0.0981595	AMPLIFICATION	2	0.0122699	DEEP DELETION	0	0	mRNA HIGH	13	0.0797546	mRNA LOW	1	0.00613497	FUSION	0	0	MISSENSE, INFRAME, TRUNCATING MUTATIONS (PUTATIVE DRIVER)	0	0
MAP2K1	ALL	9	0.0552147	AMPLIFICATION	0	0	DEEP DELETION	1	0.00613497	mRNA HIGH	8	0.0490798	mRNA LOW	0	0	FUSION	0	0	MISSENSE, INFRAME, TRUNCATING MUTATIONS (PUTATIVE DRIVER)	0	0
MAP2K2	ALL	16	0.0981595	AMPLIFICATION	1	0.00613497	DEEP DELETION	2	0.0122699	mRNA HIGH	10	0.0613497	mRNA LOW	3	0.0184049	FUSION	0	0	MISSENSE, INFRAME, TRUNCATING MUTATIONS (PUTATIVE DRIVER)	0	0
MAPK1	ALL	25	0.153374	AMPLIFICATION	2	0.0122699	DEEP DELETION	1	0.00613497	mRNA HIGH	15	0.0920245	mRNA LOW	5	0.0306748	FUSION	1	0.00613497	MISSENSE, INFRAME, TRUNCATING MUTATIONS (PUTATIVE DRIVER)	1	0.00613497
MAPK3	ALL	10	0.0613497	AMPLIFICATION	2	0.0122699	DEEP DELETION	0	0	mRNA HIGH	8	0.0490798	mRNA LOW	0	0	FUSION	0	0	MISSENSE, INFRAME, TRUNCATING MUTATIONS (PUTATIVE DRIVER)	0	0
MDM2	ALL	17	0.104294	AMPLIFICATION	8	0.0490798	DEEP DELETION	0	0	mRNA HIGH	9	0.0552147	mRNA LOW	0	0	FUSION	0	0	MISSENSE, INFRAME, TRUNCATING MUTATIONS (PUTATIVE DRIVER)	0	0
MDM4	ALL	17	0.104294	AMPLIFICATION	1	0.00613497	DEEP DELETION	0	0	mRNA HIGH	16	0.0981595	mRNA LOW	0	0	FUSION	0	0	MISSENSE, INFRAME, TRUNCATING MUTATIONS (PUTATIVE DRIVER)	0	0
MKNK1	ALL	9	0.0552147	AMPLIFICATION	0	0	DEEP DELETION	0	0	mRNA HIGH	7	0.0429448	mRNA LOW	2	0.0122699	FUSION	0	0	MISSENSE, INFRAME, TRUNCATING MUTATIONS (PUTATIVE DRIVER)	0	0
MKNK2	ALL	6	0.0368098	AMPLIFICATION	0	0	DEEP DELETION	3	0.0184049	mRNA HIGH	3	0.0184049	mRNA LOW	0	0	FUSION	0	0	MISSENSE, INFRAME, TRUNCATING MUTATIONS (PUTATIVE DRIVER)	0	0
MMP14	ALL	19	0.116564	AMPLIFICATION	2	0.0122699	DEEP DELETION	0	0	mRNA HIGH	17	0.104294	mRNA LOW	0	0	FUSION	0	0	MISSENSE, INFRAME, TRUNCATING MUTATIONS (PUTATIVE DRIVER)	0	0
MMP2	ALL	14	0.0858896	AMPLIFICATION	1	0.00613497	DEEP DELETION	1	0.00613497	mRNA HIGH	12	0.0736196	mRNA LOW	0	0	FUSION	0	0	MISSENSE, INFRAME, TRUNCATING MUTATIONS (PUTATIVE DRIVER)	0	0
MMP3	ALL	12	0.0736196	AMPLIFICATION	5	0.0306748	DEEP DELETION	0	0	mRNA HIGH	7	0.0429448	mRNA LOW	0	0	FUSION	0	0	MISSENSE, INFRAME, TRUNCATING MUTATIONS (PUTATIVE DRIVER)	0	0
MT3	ALL	11	0.0674847	AMPLIFICATION	1	0.00613497	DEEP DELETION	1	0.00613497	mRNA HIGH	9	0.0552147	mRNA LOW	0	0	FUSION	0	0	MISSENSE, INFRAME, TRUNCATING MUTATIONS (PUTATIVE DRIVER)	0	0
MTOR	ALL	16	0.0981595	AMPLIFICATION	3	0.0184049	DEEP DELETION	1	0.00613497	mRNA HIGH	11	0.0674847	mRNA LOW	1	0.00613497	FUSION	0	0	MISSENSE, INFRAME, TRUNCATING MUTATIONS (PUTATIVE DRIVER)	0	0
NDRG1	ALL	51	0.312883	AMPLIFICATION	18	0.110429	DEEP DELETION	0	0	mRNA HIGH	32	0.196319	mRNA LOW	0	0	FUSION	1	0.00613497	MISSENSE, INFRAME, TRUNCATING MUTATIONS (PUTATIVE DRIVER)	0	0
NFKB1	ALL	9	0.0552147	AMPLIFICATION	0	0	DEEP DELETION	0	0	mRNA HIGH	6	0.0368098	mRNA LOW	3	0.0184049	FUSION	0	0	MISSENSE, INFRAME, TRUNCATING MUTATIONS (PUTATIVE DRIVER)	0	0
NOS1	ALL	5	0.0306748	AMPLIFICATION	2	0.0122699	DEEP DELETION	0	0	mRNA HIGH	3	0.0184049	mRNA LOW	0	0	FUSION	0	0	MISSENSE, INFRAME, TRUNCATING MUTATIONS (PUTATIVE DRIVER)	0	0
NOS2	ALL	14	0.0858896	AMPLIFICATION	5	0.0306748	DEEP DELETION	0	0	mRNA HIGH	7	0.0429448	mRNA LOW	0	0	FUSION	2	0.0122699	MISSENSE, INFRAME, TRUNCATING MUTATIONS (PUTATIVE DRIVER)	0	0
NOS3	ALL	14	0.0858896	AMPLIFICATION	2	0.0122699	DEEP DELETION	3	0.0184049	mRNA HIGH	9	0.0552147	mRNA LOW	0	0	FUSION	0	0	MISSENSE, INFRAME, TRUNCATING MUTATIONS (PUTATIVE DRIVER)	0	0
NOTCH1	ALL	26	0.159509	AMPLIFICATION	6	0.0368098	DEEP DELETION	0	0	mRNA HIGH	11	0.0674847	mRNA LOW	0	0	FUSION	0	0	MISSENSE, INFRAME, TRUNCATING MUTATIONS (PUTATIVE DRIVER)	9	0.0552147
NPEPPS	ALL	4	0.0245399	AMPLIFICATION	1	0.00613497	DEEP DELETION	0	0	mRNA HIGH	3	0.0184049	mRNA LOW	0	0	FUSION	0	0	MISSENSE, INFRAME, TRUNCATING MUTATIONS (PUTATIVE DRIVER)	0	0
NPPA	ALL	11	0.0674847	AMPLIFICATION	4	0.0245399	DEEP DELETION	0	0	mRNA HIGH	7	0.0429448	mRNA LOW	0	0	FUSION	0	0	MISSENSE, INFRAME, TRUNCATING MUTATIONS (PUTATIVE DRIVER)	0	0
NPPB	ALL	13	0.0797546	AMPLIFICATION	4	0.0245399	DEEP DELETION	0	0	mRNA HIGH	9	0.0552147	mRNA LOW	0	0	FUSION	0	0	MISSENSE, INFRAME, TRUNCATING MUTATIONS (PUTATIVE DRIVER)	0	0
NR4A2	ALL	7	0.0429448	AMPLIFICATION	1	0.00613497	DEEP DELETION	0	0	mRNA HIGH	6	0.0368098	mRNA LOW	0	0	FUSION	0	0	MISSENSE, INFRAME, TRUNCATING MUTATIONS (PUTATIVE DRIVER)	0	0
NRP1	ALL	9	0.0552147	AMPLIFICATION	3	0.0184049	DEEP DELETION	0	0	mRNA HIGH	6	0.0368098	mRNA LOW	0	0	FUSION	0	0	MISSENSE, INFRAME, TRUNCATING MUTATIONS (PUTATIVE DRIVER)	0	0
NRP2	ALL	11	0.0674847	AMPLIFICATION	1	0.00613497	DEEP DELETION	1	0.00613497	mRNA HIGH	8	0.0490798	mRNA LOW	0	0	FUSION	1	0.00613497	MISSENSE, INFRAME, TRUNCATING MUTATIONS (PUTATIVE DRIVER)	0	0
OS9	ALL	10	0.0613497	AMPLIFICATION	1	0.00613497	DEEP DELETION	0	0	mRNA HIGH	9	0.0552147	mRNA LOW	0	0	FUSION	0	0	MISSENSE, INFRAME, TRUNCATING MUTATIONS (PUTATIVE DRIVER)	0	0
PAM	ALL	9	0.0552147	AMPLIFICATION	0	0	DEEP DELETION	3	0.0184049	mRNA HIGH	6	0.0368098	mRNA LOW	0	0	FUSION	0	0	MISSENSE, INFRAME, TRUNCATING MUTATIONS (PUTATIVE DRIVER)	0	0
PDE5A	ALL	3	0.0184049	AMPLIFICATION	0	0	DEEP DELETION	0	0	mRNA HIGH	3	0.0184049	mRNA LOW	0	0	FUSION	0	0	MISSENSE, INFRAME, TRUNCATING MUTATIONS (PUTATIVE DRIVER)	0	0
PDGFB	ALL	10	0.0613497	AMPLIFICATION	1	0.00613497	DEEP DELETION	1	0.00613497	mRNA HIGH	8	0.0490798	mRNA LOW	0	0	FUSION	0	0	MISSENSE, INFRAME, TRUNCATING MUTATIONS (PUTATIVE DRIVER)	0	0
PDHA1	ALL	13	0.0797546	AMPLIFICATION	1	0.00613497	DEEP DELETION	5	0.0306748	mRNA HIGH	7	0.0429448	mRNA LOW	0	0	FUSION	0	0	MISSENSE, INFRAME, TRUNCATING MUTATIONS (PUTATIVE DRIVER)	0	0
PDHA2	ALL	0	0	AMPLIFICATION	0	0	DEEP DELETION	0	0	mRNA HIGH	0	0	mRNA LOW	0	0	FUSION	0	0	MISSENSE, INFRAME, TRUNCATING MUTATIONS (PUTATIVE DRIVER)	0	0
PDHB	ALL	14	0.0858896	AMPLIFICATION	1	0.00613497	DEEP DELETION	4	0.0245399	mRNA HIGH	4	0.0245399	mRNA LOW	5	0.0306748	FUSION	0	0	MISSENSE, INFRAME, TRUNCATING MUTATIONS (PUTATIVE DRIVER)	0	0
PDIA2	ALL	8	0.0490798	AMPLIFICATION	0	0	DEEP DELETION	5	0.0306748	mRNA HIGH	3	0.0184049	mRNA LOW	0	0	FUSION	0	0	MISSENSE, INFRAME, TRUNCATING MUTATIONS (PUTATIVE DRIVER)	0	0
PDK1	ALL	23	0.141104	AMPLIFICATION	4	0.0245399	DEEP DELETION	0	0	mRNA HIGH	19	0.116564	mRNA LOW	0	0	FUSION	0	0	MISSENSE, INFRAME, TRUNCATING MUTATIONS (PUTATIVE DRIVER)	0	0
PFKFB3	ALL	9	0.0552147	AMPLIFICATION	2	0.0122699	DEEP DELETION	2	0.0122699	mRNA HIGH	5	0.0306748	mRNA LOW	0	0	FUSION	0	0	MISSENSE, INFRAME, TRUNCATING MUTATIONS (PUTATIVE DRIVER)	0	0
PFKL	ALL	23	0.141104	AMPLIFICATION	2	0.0122699	DEEP DELETION	3	0.0184049	mRNA HIGH	5	0.0306748	mRNA LOW	13	0.0797546	FUSION	0	0	MISSENSE, INFRAME, TRUNCATING MUTATIONS (PUTATIVE DRIVER)	0	0
PFKM	ALL	12	0.0736196	AMPLIFICATION	1	0.00613497	DEEP DELETION	0	0	mRNA HIGH	8	0.0490798	mRNA LOW	3	0.0184049	FUSION	0	0	MISSENSE, INFRAME, TRUNCATING MUTATIONS (PUTATIVE DRIVER)	0	0
PFKP	ALL	15	0.0920245	AMPLIFICATION	3	0.0184049	DEEP DELETION	2	0.0122699	mRNA HIGH	10	0.0613497	mRNA LOW	0	0	FUSION	0	0	MISSENSE, INFRAME, TRUNCATING MUTATIONS (PUTATIVE DRIVER)	0	0
PGF	ALL	18	0.110429	AMPLIFICATION	0	0	DEEP DELETION	0	0	mRNA HIGH	18	0.110429	mRNA LOW	0	0	FUSION	0	0	MISSENSE, INFRAME, TRUNCATING MUTATIONS (PUTATIVE DRIVER)	0	0
PGK1	ALL	10	0.0613497	AMPLIFICATION	0	0	DEEP DELETION	0	0	mRNA HIGH	10	0.0613497	mRNA LOW	0	0	FUSION	0	0	MISSENSE, INFRAME, TRUNCATING MUTATIONS (PUTATIVE DRIVER)	0	0
PGK2	ALL	9	0.0552147	AMPLIFICATION	9	0.0552147	DEEP DELETION	0	0	mRNA HIGH	0	0	mRNA LOW	0	0	FUSION	0	0	MISSENSE, INFRAME, TRUNCATING MUTATIONS (PUTATIVE DRIVER)	0	0
PIK3CA	ALL	98	0.601227	AMPLIFICATION	30	0.184049	DEEP DELETION	0	0	mRNA HIGH	54	0.331288	mRNA LOW	0	0	FUSION	0	0	MISSENSE, INFRAME, TRUNCATING MUTATIONS (PUTATIVE DRIVER)	14	0.0858896
PIK3CB	ALL	44	0.269939	AMPLIFICATION	10	0.0613497	DEEP DELETION	0	0	mRNA HIGH	33	0.202454	mRNA LOW	1	0.00613497	FUSION	0	0	MISSENSE, INFRAME, TRUNCATING MUTATIONS (PUTATIVE DRIVER)	0	0
PIK3CD	ALL	6	0.0368098	AMPLIFICATION	3	0.0184049	DEEP DELETION	1	0.00613497	mRNA HIGH	2	0.0122699	mRNA LOW	0	0	FUSION	0	0	MISSENSE, INFRAME, TRUNCATING MUTATIONS (PUTATIVE DRIVER)	0	0
PIK3CG	ALL	17	0.104294	AMPLIFICATION	9	0.0552147	DEEP DELETION	0	0	mRNA HIGH	8	0.0490798	mRNA LOW	0	0	FUSION	0	0	MISSENSE, INFRAME, TRUNCATING MUTATIONS (PUTATIVE DRIVER)	0	0
PIK3R1	ALL	7	0.0429448	AMPLIFICATION	0	0	DEEP DELETION	2	0.0122699	mRNA HIGH	4	0.0245399	mRNA LOW	0	0	FUSION	0	0	MISSENSE, INFRAME, TRUNCATING MUTATIONS (PUTATIVE DRIVER)	1	0.00613497
PIK3R2	ALL	16	0.0981595	AMPLIFICATION	2	0.0122699	DEEP DELETION	0	0	mRNA HIGH	14	0.0858896	mRNA LOW	0	0	FUSION	0	0	MISSENSE, INFRAME, TRUNCATING MUTATIONS (PUTATIVE DRIVER)	0	0
PIK3R3	ALL	12	0.0736196	AMPLIFICATION	0	0	DEEP DELETION	0	0	mRNA HIGH	12	0.0736196	mRNA LOW	0	0	FUSION	0	0	MISSENSE, INFRAME, TRUNCATING MUTATIONS (PUTATIVE DRIVER)	0	0
PKLR	ALL	7	0.0429448	AMPLIFICATION	3	0.0184049	DEEP DELETION	0	0	mRNA HIGH	4	0.0245399	mRNA LOW	0	0	FUSION	0	0	MISSENSE, INFRAME, TRUNCATING MUTATIONS (PUTATIVE DRIVER)	0	0
PLCG1	ALL	18	0.110429	AMPLIFICATION	4	0.0245399	DEEP DELETION	0	0	mRNA HIGH	14	0.0858896	mRNA LOW	0	0	FUSION	0	0	MISSENSE, INFRAME, TRUNCATING MUTATIONS (PUTATIVE DRIVER)	0	0
PLCG2	ALL	1	0.00613497	AMPLIFICATION	0	0	DEEP DELETION	0	0	mRNA HIGH	1	0.00613497	mRNA LOW	0	0	FUSION	0	0	MISSENSE, INFRAME, TRUNCATING MUTATIONS (PUTATIVE DRIVER)	0	0
PLOD1	ALL	12	0.0736196	AMPLIFICATION	4	0.0245399	DEEP DELETION	0	0	mRNA HIGH	8	0.0490798	mRNA LOW	0	0	FUSION	0	0	MISSENSE, INFRAME, TRUNCATING MUTATIONS (PUTATIVE DRIVER)	0	0
PLOD2	ALL	42	0.257669	AMPLIFICATION	14	0.0858896	DEEP DELETION	0	0	mRNA HIGH	28	0.171779	mRNA LOW	0	0	FUSION	0	0	MISSENSE, INFRAME, TRUNCATING MUTATIONS (PUTATIVE DRIVER)	0	0
PMAIP1	ALL	14	0.0858896	AMPLIFICATION	0	0	DEEP DELETION	8	0.0490798	mRNA HIGH	6	0.0368098	mRNA LOW	0	0	FUSION	0	0	MISSENSE, INFRAME, TRUNCATING MUTATIONS (PUTATIVE DRIVER)	0	0
PML	ALL	10	0.0613497	AMPLIFICATION	2	0.0122699	DEEP DELETION	1	0.00613497	mRNA HIGH	7	0.0429448	mRNA LOW	0	0	FUSION	0	0	MISSENSE, INFRAME, TRUNCATING MUTATIONS (PUTATIVE DRIVER)	0	0
POLR2A	ALL	9	0.0552147	AMPLIFICATION	1	0.00613497	DEEP DELETION	2	0.0122699	mRNA HIGH	6	0.0368098	mRNA LOW	0	0	FUSION	0	0	MISSENSE, INFRAME, TRUNCATING MUTATIONS (PUTATIVE DRIVER)	0	0
PPARA	ALL	12	0.0736196	AMPLIFICATION	2	0.0122699	DEEP DELETION	1	0.00613497	mRNA HIGH	9	0.0552147	mRNA LOW	0	0	FUSION	0	0	MISSENSE, INFRAME, TRUNCATING MUTATIONS (PUTATIVE DRIVER)	0	0
PRKAA1	ALL	46	0.282209	AMPLIFICATION	15	0.0920245	DEEP DELETION	0	0	mRNA HIGH	31	0.190184	mRNA LOW	0	0	FUSION	0	0	MISSENSE, INFRAME, TRUNCATING MUTATIONS (PUTATIVE DRIVER)	0	0
PRKAA2	ALL	9	0.0552147	AMPLIFICATION	0	0	DEEP DELETION	0	0	mRNA HIGH	9	0.0552147	mRNA LOW	0	0	FUSION	0	0	MISSENSE, INFRAME, TRUNCATING MUTATIONS (PUTATIVE DRIVER)	0	0
PRKCA	ALL	12	0.0736196	AMPLIFICATION	4	0.0245399	DEEP DELETION	1	0.00613497	mRNA HIGH	7	0.0429448	mRNA LOW	0	0	FUSION	0	0	MISSENSE, INFRAME, TRUNCATING MUTATIONS (PUTATIVE DRIVER)	0	0
PRKCB	ALL	2	0.0122699	AMPLIFICATION	0	0	DEEP DELETION	0	0	mRNA HIGH	2	0.0122699	mRNA LOW	0	0	FUSION	0	0	MISSENSE, INFRAME, TRUNCATING MUTATIONS (PUTATIVE DRIVER)	0	0
PRKCG	ALL	6	0.0368098	AMPLIFICATION	1	0.00613497	DEEP DELETION	2	0.0122699	mRNA HIGH	3	0.0184049	mRNA LOW	0	0	FUSION	0	0	MISSENSE, INFRAME, TRUNCATING MUTATIONS (PUTATIVE DRIVER)	0	0
PSEN2	ALL	18	0.110429	AMPLIFICATION	3	0.0184049	DEEP DELETION	0	0	mRNA HIGH	13	0.0797546	mRNA LOW	2	0.0122699	FUSION	0	0	MISSENSE, INFRAME, TRUNCATING MUTATIONS (PUTATIVE DRIVER)	0	0
PSMC3	ALL	9	0.0552147	AMPLIFICATION	0	0	DEEP DELETION	0	0	mRNA HIGH	8	0.0490798	mRNA LOW	1	0.00613497	FUSION	0	0	MISSENSE, INFRAME, TRUNCATING MUTATIONS (PUTATIVE DRIVER)	0	0
RBX1	ALL	9	0.0552147	AMPLIFICATION	1	0.00613497	DEEP DELETION	0	0	mRNA HIGH	8	0.0490798	mRNA LOW	0	0	FUSION	0	0	MISSENSE, INFRAME, TRUNCATING MUTATIONS (PUTATIVE DRIVER)	0	0
RELA	ALL	23	0.141104	AMPLIFICATION	3	0.0184049	DEEP DELETION	1	0.00613497	mRNA HIGH	16	0.0981595	mRNA LOW	3	0.0184049	FUSION	0	0	MISSENSE, INFRAME, TRUNCATING MUTATIONS (PUTATIVE DRIVER)	0	0
RPS6	ALL	12	0.0736196	AMPLIFICATION	1	0.00613497	DEEP DELETION	1	0.00613497	mRNA HIGH	8	0.0490798	mRNA LOW	2	0.0122699	FUSION	0	0	MISSENSE, INFRAME, TRUNCATING MUTATIONS (PUTATIVE DRIVER)	0	0
RPS6KB1	ALL	22	0.134969	AMPLIFICATION	5	0.0306748	DEEP DELETION	1	0.00613497	mRNA HIGH	14	0.0858896	mRNA LOW	2	0.0122699	FUSION	0	0	MISSENSE, INFRAME, TRUNCATING MUTATIONS (PUTATIVE DRIVER)	0	0
RPS6KB2	ALL	29	0.177914	AMPLIFICATION	9	0.0552147	DEEP DELETION	0	0	mRNA HIGH	20	0.122699	mRNA LOW	0	0	FUSION	0	0	MISSENSE, INFRAME, TRUNCATING MUTATIONS (PUTATIVE DRIVER)	0	0
RYR1	ALL	26	0.159509	AMPLIFICATION	6	0.0368098	DEEP DELETION	0	0	mRNA HIGH	20	0.122699	mRNA LOW	0	0	FUSION	0	0	MISSENSE, INFRAME, TRUNCATING MUTATIONS (PUTATIVE DRIVER)	0	0
SATB1	ALL	4	0.0245399	AMPLIFICATION	0	0	DEEP DELETION	1	0.00613497	mRNA HIGH	3	0.0184049	mRNA LOW	0	0	FUSION	0	0	MISSENSE, INFRAME, TRUNCATING MUTATIONS (PUTATIVE DRIVER)	0	0
SCNN1B	ALL	4	0.0245399	AMPLIFICATION	0	0	DEEP DELETION	0	0	mRNA HIGH	4	0.0245399	mRNA LOW	0	0	FUSION	0	0	MISSENSE, INFRAME, TRUNCATING MUTATIONS (PUTATIVE DRIVER)	0	0
SERPINE1	ALL	31	0.190184	AMPLIFICATION	14	0.0858896	DEEP DELETION	0	0	mRNA HIGH	17	0.104294	mRNA LOW	0	0	FUSION	0	0	MISSENSE, INFRAME, TRUNCATING MUTATIONS (PUTATIVE DRIVER)	0	0
SFRP1	ALL	14	0.0858896	AMPLIFICATION	8	0.0490798	DEEP DELETION	2	0.0122699	mRNA HIGH	4	0.0245399	mRNA LOW	0	0	FUSION	0	0	MISSENSE, INFRAME, TRUNCATING MUTATIONS (PUTATIVE DRIVER)	0	0
SHC1	ALL	12	0.0736196	AMPLIFICATION	4	0.0245399	DEEP DELETION	1	0.00613497	mRNA HIGH	7	0.0429448	mRNA LOW	0	0	FUSION	0	0	MISSENSE, INFRAME, TRUNCATING MUTATIONS (PUTATIVE DRIVER)	0	0
SLC29A1	ALL	30	0.184049	AMPLIFICATION	13	0.0797546	DEEP DELETION	0	0	mRNA HIGH	17	0.104294	mRNA LOW	0	0	FUSION	0	0	MISSENSE, INFRAME, TRUNCATING MUTATIONS (PUTATIVE DRIVER)	0	0
SLC2A1	ALL	9	0.0552147	AMPLIFICATION	3	0.0184049	DEEP DELETION	0	0	mRNA HIGH	6	0.0368098	mRNA LOW	0	0	FUSION	0	0	MISSENSE, INFRAME, TRUNCATING MUTATIONS (PUTATIVE DRIVER)	0	0
SLC8A1	ALL	9	0.0552147	AMPLIFICATION	2	0.0122699	DEEP DELETION	0	0	mRNA HIGH	7	0.0429448	mRNA LOW	0	0	FUSION	0	0	MISSENSE, INFRAME, TRUNCATING MUTATIONS (PUTATIVE DRIVER)	0	0
SMAD3	ALL	14	0.0858896	AMPLIFICATION	0	0	DEEP DELETION	1	0.00613497	mRNA HIGH	12	0.0736196	mRNA LOW	0	0	FUSION	0	0	MISSENSE, INFRAME, TRUNCATING MUTATIONS (PUTATIVE DRIVER)	1	0.00613497
SMAD4	ALL	41	0.251534	AMPLIFICATION	0	0	DEEP DELETION	12	0.0736196	mRNA HIGH	4	0.0245399	mRNA LOW	16	0.0981595	FUSION	0	0	MISSENSE, INFRAME, TRUNCATING MUTATIONS (PUTATIVE DRIVER)	9	0.0552147
SNAI3	ALL	4	0.0245399	AMPLIFICATION	1	0.00613497	DEEP DELETION	1	0.00613497	mRNA HIGH	2	0.0122699	mRNA LOW	0	0	FUSION	0	0	MISSENSE, INFRAME, TRUNCATING MUTATIONS (PUTATIVE DRIVER)	0	0
SOD2	ALL	7	0.0429448	AMPLIFICATION	0	0	DEEP DELETION	1	0.00613497	mRNA HIGH	6	0.0368098	mRNA LOW	0	0	FUSION	0	0	MISSENSE, INFRAME, TRUNCATING MUTATIONS (PUTATIVE DRIVER)	0	0
SOD3	ALL	3	0.0184049	AMPLIFICATION	0	0	DEEP DELETION	1	0.00613497	mRNA HIGH	2	0.0122699	mRNA LOW	0	0	FUSION	0	0	MISSENSE, INFRAME, TRUNCATING MUTATIONS (PUTATIVE DRIVER)	0	0
SPRY2	ALL	8	0.0490798	AMPLIFICATION	0	0	DEEP DELETION	1	0.00613497	mRNA HIGH	7	0.0429448	mRNA LOW	0	0	FUSION	0	0	MISSENSE, INFRAME, TRUNCATING MUTATIONS (PUTATIVE DRIVER)	0	0
STAT3	ALL	18	0.110429	AMPLIFICATION	5	0.0306748	DEEP DELETION	0	0	mRNA HIGH	11	0.0674847	mRNA LOW	0	0	FUSION	2	0.0122699	MISSENSE, INFRAME, TRUNCATING MUTATIONS (PUTATIVE DRIVER)	0	0
STAT5B	ALL	16	0.0981595	AMPLIFICATION	5	0.0306748	DEEP DELETION	0	0	mRNA HIGH	9	0.0552147	mRNA LOW	1	0.00613497	FUSION	1	0.00613497	MISSENSE, INFRAME, TRUNCATING MUTATIONS (PUTATIVE DRIVER)	0	0
STC1	ALL	6	0.0368098	AMPLIFICATION	0	0	DEEP DELETION	5	0.0306748	mRNA HIGH	1	0.00613497	mRNA LOW	0	0	FUSION	0	0	MISSENSE, INFRAME, TRUNCATING MUTATIONS (PUTATIVE DRIVER)	0	0
STC2	ALL	7	0.0429448	AMPLIFICATION	0	0	DEEP DELETION	1	0.00613497	mRNA HIGH	6	0.0368098	mRNA LOW	0	0	FUSION	0	0	MISSENSE, INFRAME, TRUNCATING MUTATIONS (PUTATIVE DRIVER)	0	0
TEK	ALL	16	0.0981595	AMPLIFICATION	1	0.00613497	DEEP DELETION	6	0.0368098	mRNA HIGH	9	0.0552147	mRNA LOW	0	0	FUSION	0	0	MISSENSE, INFRAME, TRUNCATING MUTATIONS (PUTATIVE DRIVER)	0	0
TF	ALL	8	0.0490798	AMPLIFICATION	7	0.0429448	DEEP DELETION	0	0	mRNA HIGH	1	0.00613497	mRNA LOW	0	0	FUSION	0	0	MISSENSE, INFRAME, TRUNCATING MUTATIONS (PUTATIVE DRIVER)	0	0
TFRC	ALL	71	0.435583	AMPLIFICATION	31	0.190184	DEEP DELETION	0	0	mRNA HIGH	40	0.245399	mRNA LOW	0	0	FUSION	0	0	MISSENSE, INFRAME, TRUNCATING MUTATIONS (PUTATIVE DRIVER)	0	0
TGFA	ALL	13	0.0797546	AMPLIFICATION	1	0.00613497	DEEP DELETION	1	0.00613497	mRNA HIGH	11	0.0674847	mRNA LOW	0	0	FUSION	0	0	MISSENSE, INFRAME, TRUNCATING MUTATIONS (PUTATIVE DRIVER)	0	0
TGFB1	ALL	10	0.0613497	AMPLIFICATION	1	0.00613497	DEEP DELETION	0	0	mRNA HIGH	9	0.0552147	mRNA LOW	0	0	FUSION	0	0	MISSENSE, INFRAME, TRUNCATING MUTATIONS (PUTATIVE DRIVER)	0	0
TGFB2	ALL	11	0.0674847	AMPLIFICATION	3	0.0184049	DEEP DELETION	1	0.00613497	mRNA HIGH	7	0.0429448	mRNA LOW	0	0	FUSION	0	0	MISSENSE, INFRAME, TRUNCATING MUTATIONS (PUTATIVE DRIVER)	0	0
TGFB3	ALL	12	0.0736196	AMPLIFICATION	0	0	DEEP DELETION	0	0	mRNA HIGH	12	0.0736196	mRNA LOW	0	0	FUSION	0	0	MISSENSE, INFRAME, TRUNCATING MUTATIONS (PUTATIVE DRIVER)	0	0
TGFBR1	ALL	14	0.0858896	AMPLIFICATION	1	0.00613497	DEEP DELETION	0	0	mRNA HIGH	13	0.0797546	mRNA LOW	0	0	FUSION	0	0	MISSENSE, INFRAME, TRUNCATING MUTATIONS (PUTATIVE DRIVER)	0	0
TH	ALL	6	0.0368098	AMPLIFICATION	0	0	DEEP DELETION	3	0.0184049	mRNA HIGH	3	0.0184049	mRNA LOW	0	0	FUSION	0	0	MISSENSE, INFRAME, TRUNCATING MUTATIONS (PUTATIVE DRIVER)	0	0
THBS1	ALL	9	0.0552147	AMPLIFICATION	1	0.00613497	DEEP DELETION	0	0	mRNA HIGH	8	0.0490798	mRNA LOW	0	0	FUSION	0	0	MISSENSE, INFRAME, TRUNCATING MUTATIONS (PUTATIVE DRIVER)	0	0
TIMP1	ALL	10	0.0613497	AMPLIFICATION	2	0.0122699	DEEP DELETION	5	0.0306748	mRNA HIGH	3	0.0184049	mRNA LOW	0	0	FUSION	0	0	MISSENSE, INFRAME, TRUNCATING MUTATIONS (PUTATIVE DRIVER)	0	0
TLR4	ALL	6	0.0368098	AMPLIFICATION	1	0.00613497	DEEP DELETION	0	0	mRNA HIGH	5	0.0306748	mRNA LOW	0	0	FUSION	0	0	MISSENSE, INFRAME, TRUNCATING MUTATIONS (PUTATIVE DRIVER)	0	0
TNC	ALL	15	0.0920245	AMPLIFICATION	2	0.0122699	DEEP DELETION	0	0	mRNA HIGH	13	0.0797546	mRNA LOW	0	0	FUSION	0	0	MISSENSE, INFRAME, TRUNCATING MUTATIONS (PUTATIVE DRIVER)	0	0
TNF	ALL	9	0.0552147	AMPLIFICATION	3	0.0184049	DEEP DELETION	0	0	mRNA HIGH	6	0.0368098	mRNA LOW	0	0	FUSION	0	0	MISSENSE, INFRAME, TRUNCATING MUTATIONS (PUTATIVE DRIVER)	0	0
TP53	ALL	151	0.92638	AMPLIFICATION	1	0.00613497	DEEP DELETION	2	0.0122699	mRNA HIGH	7	0.0429448	mRNA LOW	0	0	FUSION	0	0	MISSENSE, INFRAME, TRUNCATING MUTATIONS (PUTATIVE DRIVER)	141	0.865031
TSC2	ALL	10	0.0613497	AMPLIFICATION	1	0.00613497	DEEP DELETION	3	0.0184049	mRNA HIGH	5	0.0306748	mRNA LOW	0	0	FUSION	0	0	MISSENSE, INFRAME, TRUNCATING MUTATIONS (PUTATIVE DRIVER)	1	0.00613497
UBE2B	ALL	3	0.0184049	AMPLIFICATION	0	0	DEEP DELETION	0	0	mRNA HIGH	3	0.0184049	mRNA LOW	0	0	FUSION	0	0	MISSENSE, INFRAME, TRUNCATING MUTATIONS (PUTATIVE DRIVER)	0	0
UCP2	ALL	18	0.110429	AMPLIFICATION	15	0.0920245	DEEP DELETION	0	0	mRNA HIGH	3	0.0184049	mRNA LOW	0	0	FUSION	0	0	MISSENSE, INFRAME, TRUNCATING MUTATIONS (PUTATIVE DRIVER)	0	0
USF1	ALL	26	0.159509	AMPLIFICATION	7	0.0429448	DEEP DELETION	0	0	mRNA HIGH	19	0.116564	mRNA LOW	0	0	FUSION	0	0	MISSENSE, INFRAME, TRUNCATING MUTATIONS (PUTATIVE DRIVER)	0	0
VCAM1	ALL	2	0.0122699	AMPLIFICATION	0	0	DEEP DELETION	0	0	mRNA HIGH	2	0.0122699	mRNA LOW	0	0	FUSION	0	0	MISSENSE, INFRAME, TRUNCATING MUTATIONS (PUTATIVE DRIVER)	0	0
VEGFA	ALL	34	0.208589	AMPLIFICATION	17	0.104294	DEEP DELETION	0	0	mRNA HIGH	17	0.104294	mRNA LOW	0	0	FUSION	0	0	MISSENSE, INFRAME, TRUNCATING MUTATIONS (PUTATIVE DRIVER)	0	0
VEGFC	ALL	17	0.104294	AMPLIFICATION	3	0.0184049	DEEP DELETION	6	0.0368098	mRNA HIGH	8	0.0490798	mRNA LOW	0	0	FUSION	0	0	MISSENSE, INFRAME, TRUNCATING MUTATIONS (PUTATIVE DRIVER)	0	0
VHL	ALL	23	0.141104	AMPLIFICATION	4	0.0245399	DEEP DELETION	1	0.00613497	mRNA HIGH	8	0.0490798	mRNA LOW	10	0.0613497	FUSION	0	0	MISSENSE, INFRAME, TRUNCATING MUTATIONS (PUTATIVE DRIVER)	0	0
VLDLR	ALL	9	0.0552147	AMPLIFICATION	1	0.00613497	DEEP DELETION	6	0.0368098	mRNA HIGH	2	0.0122699	mRNA LOW	0	0	FUSION	0	0	MISSENSE, INFRAME, TRUNCATING MUTATIONS (PUTATIVE DRIVER)	0	0

## Sheet: ST_7
Supplementary Table 7. Frequency of genetic alterations in the hypoxia-related genes of 431 individuals with head and neck squamous cell carcinoma from the TCGA Pan-Cancer Atlas project (TCGA-HNSC-PanCancer).
GENE	TYPE	TOTAL	FREQUENCY	TYPE	TOTAL	FREQUENCY	TYPE	TOTAL	FREQUENCY	TYPE	TOTAL	FREQUENCY	TYPE	TOTAL	FREQUENCY	TYPE	TOTAL	FREQUENCY	TYPE	TOTAL	FREQUENCY
ACTN4	ALL	43	0.099768	AMPLIFICATION	4	0.00928074	DEEP DELETION	0	0	mRNA HIGH	24	0.0556845	mRNA LOW	15	0.0348028	FUSION	0	0	MISSENSE, INFRAME, TRUNCATING MUTATIONS (PUTATIVE DRIVER)	0	0
ADA	ALL	12	0.0278422	AMPLIFICATION	1	0.00232019	DEEP DELETION	1	0.00232019	mRNA HIGH	10	0.0232019	mRNA LOW	0	0	FUSION	0	0	MISSENSE, INFRAME, TRUNCATING MUTATIONS (PUTATIVE DRIVER)	0	0
ADAM8	ALL	12	0.0278422	AMPLIFICATION	0	0	DEEP DELETION	1	0.00232019	mRNA HIGH	11	0.025522	mRNA LOW	0	0	FUSION	0	0	MISSENSE, INFRAME, TRUNCATING MUTATIONS (PUTATIVE DRIVER)	0	0
ADM	ALL	12	0.0278422	AMPLIFICATION	0	0	DEEP DELETION	0	0	mRNA HIGH	12	0.0278422	mRNA LOW	0	0	FUSION	0	0	MISSENSE, INFRAME, TRUNCATING MUTATIONS (PUTATIVE DRIVER)	0	0
ADORA1	ALL	21	0.0487239	AMPLIFICATION	1	0.00232019	DEEP DELETION	0	0	mRNA HIGH	20	0.0464037	mRNA LOW	0	0	FUSION	0	0	MISSENSE, INFRAME, TRUNCATING MUTATIONS (PUTATIVE DRIVER)	0	0
ADRA1B	ALL	13	0.0301624	AMPLIFICATION	0	0	DEEP DELETION	1	0.00232019	mRNA HIGH	12	0.0278422	mRNA LOW	0	0	FUSION	0	0	MISSENSE, INFRAME, TRUNCATING MUTATIONS (PUTATIVE DRIVER)	0	0
AKT1	ALL	79	0.183295	AMPLIFICATION	5	0.0116009	DEEP DELETION	3	0.00696056	mRNA HIGH	53	0.12297	mRNA LOW	16	0.037123	FUSION	0	0	MISSENSE, INFRAME, TRUNCATING MUTATIONS (PUTATIVE DRIVER)	2	0.00464037
AKT2	ALL	60	0.139211	AMPLIFICATION	4	0.00928074	DEEP DELETION	0	0	mRNA HIGH	31	0.0719258	mRNA LOW	25	0.0580046	FUSION	0	0	MISSENSE, INFRAME, TRUNCATING MUTATIONS (PUTATIVE DRIVER)	0	0
AKT3	ALL	39	0.0904872	AMPLIFICATION	4	0.00928074	DEEP DELETION	1	0.00232019	mRNA HIGH	34	0.0788863	mRNA LOW	0	0	FUSION	0	0	MISSENSE, INFRAME, TRUNCATING MUTATIONS (PUTATIVE DRIVER)	0	0
ALAS2	ALL	19	0.0440835	AMPLIFICATION	6	0.0139211	DEEP DELETION	6	0.0139211	mRNA HIGH	7	0.0162413	mRNA LOW	0	0	FUSION	0	0	MISSENSE, INFRAME, TRUNCATING MUTATIONS (PUTATIVE DRIVER)	0	0
ALDOA	ALL	25	0.0580046	AMPLIFICATION	1	0.00232019	DEEP DELETION	0	0	mRNA HIGH	23	0.0533643	mRNA LOW	1	0.00232019	FUSION	0	0	MISSENSE, INFRAME, TRUNCATING MUTATIONS (PUTATIVE DRIVER)	0	0
ALDOB	ALL	9	0.0208817	AMPLIFICATION	2	0.00464037	DEEP DELETION	0	0	mRNA HIGH	7	0.0162413	mRNA LOW	0	0	FUSION	0	0	MISSENSE, INFRAME, TRUNCATING MUTATIONS (PUTATIVE DRIVER)	0	0
ALDOC	ALL	28	0.0649652	AMPLIFICATION	0	0	DEEP DELETION	0	0	mRNA HIGH	28	0.0649652	mRNA LOW	0	0	FUSION	0	0	MISSENSE, INFRAME, TRUNCATING MUTATIONS (PUTATIVE DRIVER)	0	0
ANG	ALL	23	0.0533643	AMPLIFICATION	5	0.0116009	DEEP DELETION	0	0	mRNA HIGH	18	0.0417633	mRNA LOW	0	0	FUSION	0	0	MISSENSE, INFRAME, TRUNCATING MUTATIONS (PUTATIVE DRIVER)	0	0
ANGPT1	ALL	30	0.0696056	AMPLIFICATION	19	0.0440835	DEEP DELETION	0	0	mRNA HIGH	11	0.025522	mRNA LOW	0	0	FUSION	0	0	MISSENSE, INFRAME, TRUNCATING MUTATIONS (PUTATIVE DRIVER)	0	0
ANGPT2	ALL	34	0.0788863	AMPLIFICATION	0	0	DEEP DELETION	13	0.0301624	mRNA HIGH	21	0.0487239	mRNA LOW	0	0	FUSION	0	0	MISSENSE, INFRAME, TRUNCATING MUTATIONS (PUTATIVE DRIVER)	0	0
ANGPT4	ALL	19	0.0440835	AMPLIFICATION	1	0.00232019	DEEP DELETION	0	0	mRNA HIGH	18	0.0417633	mRNA LOW	0	0	FUSION	0	0	MISSENSE, INFRAME, TRUNCATING MUTATIONS (PUTATIVE DRIVER)	0	0
ANGPTL4	ALL	20	0.0464037	AMPLIFICATION	2	0.00464037	DEEP DELETION	0	0	mRNA HIGH	18	0.0417633	mRNA LOW	0	0	FUSION	0	0	MISSENSE, INFRAME, TRUNCATING MUTATIONS (PUTATIVE DRIVER)	0	0
AQP1	ALL	25	0.0580046	AMPLIFICATION	6	0.0139211	DEEP DELETION	0	0	mRNA HIGH	19	0.0440835	mRNA LOW	0	0	FUSION	0	0	MISSENSE, INFRAME, TRUNCATING MUTATIONS (PUTATIVE DRIVER)	0	0
ARG2	ALL	9	0.0208817	AMPLIFICATION	3	0.00696056	DEEP DELETION	0	0	mRNA HIGH	6	0.0139211	mRNA LOW	0	0	FUSION	0	0	MISSENSE, INFRAME, TRUNCATING MUTATIONS (PUTATIVE DRIVER)	0	0
ARNT	ALL	39	0.0904872	AMPLIFICATION	6	0.0139211	DEEP DELETION	0	0	mRNA HIGH	25	0.0580046	mRNA LOW	8	0.0185615	FUSION	0	0	MISSENSE, INFRAME, TRUNCATING MUTATIONS (PUTATIVE DRIVER)	0	0
ARNT2	ALL	15	0.0348028	AMPLIFICATION	1	0.00232019	DEEP DELETION	1	0.00232019	mRNA HIGH	13	0.0301624	mRNA LOW	0	0	FUSION	0	0	MISSENSE, INFRAME, TRUNCATING MUTATIONS (PUTATIVE DRIVER)	0	0
ASCL2	ALL	14	0.0324826	AMPLIFICATION	1	0.00232019	DEEP DELETION	1	0.00232019	mRNA HIGH	12	0.0278422	mRNA LOW	0	0	FUSION	0	0	MISSENSE, INFRAME, TRUNCATING MUTATIONS (PUTATIVE DRIVER)	0	0
ATP1A1	ALL	29	0.0672854	AMPLIFICATION	0	0	DEEP DELETION	13	0.0301624	mRNA HIGH	11	0.025522	mRNA LOW	5	0.0116009	FUSION	0	0	MISSENSE, INFRAME, TRUNCATING MUTATIONS (PUTATIVE DRIVER)	0	0
ATP1A2	ALL	9	0.0208817	AMPLIFICATION	4	0.00928074	DEEP DELETION	0	0	mRNA HIGH	5	0.0116009	mRNA LOW	0	0	FUSION	0	0	MISSENSE, INFRAME, TRUNCATING MUTATIONS (PUTATIVE DRIVER)	0	0
ATP1B1	ALL	44	0.102088	AMPLIFICATION	2	0.00464037	DEEP DELETION	0	0	mRNA HIGH	42	0.0974478	mRNA LOW	0	0	FUSION	0	0	MISSENSE, INFRAME, TRUNCATING MUTATIONS (PUTATIVE DRIVER)	0	0
BACH1	ALL	14	0.0324826	AMPLIFICATION	0	0	DEEP DELETION	2	0.00464037	mRNA HIGH	11	0.025522	mRNA LOW	0	0	FUSION	1	0.00232019	MISSENSE, INFRAME, TRUNCATING MUTATIONS (PUTATIVE DRIVER)	0	0
BAD	ALL	31	0.0719258	AMPLIFICATION	7	0.0162413	DEEP DELETION	1	0.00232019	mRNA HIGH	22	0.0510441	mRNA LOW	0	0	FUSION	1	0.00232019	MISSENSE, INFRAME, TRUNCATING MUTATIONS (PUTATIVE DRIVER)	0	0
BBC3	ALL	16	0.037123	AMPLIFICATION	0	0	DEEP DELETION	0	0	mRNA HIGH	16	0.037123	mRNA LOW	0	0	FUSION	0	0	MISSENSE, INFRAME, TRUNCATING MUTATIONS (PUTATIVE DRIVER)	0	0
BCL2	ALL	27	0.062645	AMPLIFICATION	0	0	DEEP DELETION	14	0.0324826	mRNA HIGH	13	0.0301624	mRNA LOW	0	0	FUSION	0	0	MISSENSE, INFRAME, TRUNCATING MUTATIONS (PUTATIVE DRIVER)	0	0
BNIP3	ALL	14	0.0324826	AMPLIFICATION	0	0	DEEP DELETION	0	0	mRNA HIGH	14	0.0324826	mRNA LOW	0	0	FUSION	0	0	MISSENSE, INFRAME, TRUNCATING MUTATIONS (PUTATIVE DRIVER)	0	0
CAMK2A	ALL	7	0.0162413	AMPLIFICATION	0	0	DEEP DELETION	1	0.00232019	mRNA HIGH	6	0.0139211	mRNA LOW	0	0	FUSION	0	0	MISSENSE, INFRAME, TRUNCATING MUTATIONS (PUTATIVE DRIVER)	0	0
CAMK2B	ALL	14	0.0324826	AMPLIFICATION	6	0.0139211	DEEP DELETION	0	0	mRNA HIGH	8	0.0185615	mRNA LOW	0	0	FUSION	0	0	MISSENSE, INFRAME, TRUNCATING MUTATIONS (PUTATIVE DRIVER)	0	0
CAMK2D	ALL	23	0.0533643	AMPLIFICATION	1	0.00232019	DEEP DELETION	0	0	mRNA HIGH	22	0.0510441	mRNA LOW	0	0	FUSION	0	0	MISSENSE, INFRAME, TRUNCATING MUTATIONS (PUTATIVE DRIVER)	0	0
CAMK2G	ALL	28	0.0649652	AMPLIFICATION	2	0.00464037	DEEP DELETION	0	0	mRNA HIGH	22	0.0510441	mRNA LOW	4	0.00928074	FUSION	0	0	MISSENSE, INFRAME, TRUNCATING MUTATIONS (PUTATIVE DRIVER)	0	0
CASR	ALL	18	0.0417633	AMPLIFICATION	13	0.0301624	DEEP DELETION	0	0	mRNA HIGH	5	0.0116009	mRNA LOW	0	0	FUSION	0	0	MISSENSE, INFRAME, TRUNCATING MUTATIONS (PUTATIVE DRIVER)	0	0
CAV1	ALL	27	0.062645	AMPLIFICATION	2	0.00464037	DEEP DELETION	0	0	mRNA HIGH	25	0.0580046	mRNA LOW	0	0	FUSION	0	0	MISSENSE, INFRAME, TRUNCATING MUTATIONS (PUTATIVE DRIVER)	0	0
CCL2	ALL	18	0.0417633	AMPLIFICATION	1	0.00232019	DEEP DELETION	0	0	mRNA HIGH	17	0.0394432	mRNA LOW	0	0	FUSION	0	0	MISSENSE, INFRAME, TRUNCATING MUTATIONS (PUTATIVE DRIVER)	0	0
CD24	ALL	0	0	AMPLIFICATION	0	0	DEEP DELETION	0	0	mRNA HIGH	0	0	mRNA LOW	0	0	FUSION	0	0	MISSENSE, INFRAME, TRUNCATING MUTATIONS (PUTATIVE DRIVER)	0	0
CDH1	ALL	26	0.0603248	AMPLIFICATION	0	0	DEEP DELETION	0	0	mRNA HIGH	20	0.0464037	mRNA LOW	6	0.0139211	FUSION	0	0	MISSENSE, INFRAME, TRUNCATING MUTATIONS (PUTATIVE DRIVER)	0	0
CDKN1A	ALL	15	0.0348028	AMPLIFICATION	2	0.00464037	DEEP DELETION	0	0	mRNA HIGH	13	0.0301624	mRNA LOW	0	0	FUSION	0	0	MISSENSE, INFRAME, TRUNCATING MUTATIONS (PUTATIVE DRIVER)	0	0
CDKN1B	ALL	40	0.0928074	AMPLIFICATION	4	0.00928074	DEEP DELETION	2	0.00464037	mRNA HIGH	34	0.0788863	mRNA LOW	0	0	FUSION	0	0	MISSENSE, INFRAME, TRUNCATING MUTATIONS (PUTATIVE DRIVER)	0	0
CHRNA7	ALL	14	0.0324826	AMPLIFICATION	2	0.00464037	DEEP DELETION	0	0	mRNA HIGH	12	0.0278422	mRNA LOW	0	0	FUSION	0	0	MISSENSE, INFRAME, TRUNCATING MUTATIONS (PUTATIVE DRIVER)	0	0
CHRNB2	ALL	11	0.025522	AMPLIFICATION	3	0.00696056	DEEP DELETION	0	0	mRNA HIGH	8	0.0185615	mRNA LOW	0	0	FUSION	0	0	MISSENSE, INFRAME, TRUNCATING MUTATIONS (PUTATIVE DRIVER)	0	0
CIAO3	ALL	25	0.0580046	AMPLIFICATION	1	0.00232019	DEEP DELETION	0	0	mRNA HIGH	24	0.0556845	mRNA LOW	0	0	FUSION	0	0	MISSENSE, INFRAME, TRUNCATING MUTATIONS (PUTATIVE DRIVER)	0	0
CITED2	ALL	20	0.0464037	AMPLIFICATION	1	0.00232019	DEEP DELETION	1	0.00232019	mRNA HIGH	18	0.0417633	mRNA LOW	0	0	FUSION	0	0	MISSENSE, INFRAME, TRUNCATING MUTATIONS (PUTATIVE DRIVER)	0	0
CLDN3	ALL	8	0.0185615	AMPLIFICATION	3	0.00696056	DEEP DELETION	0	0	mRNA HIGH	5	0.0116009	mRNA LOW	0	0	FUSION	0	0	MISSENSE, INFRAME, TRUNCATING MUTATIONS (PUTATIVE DRIVER)	0	0
COPS5	ALL	105	0.243619	AMPLIFICATION	13	0.0301624	DEEP DELETION	0	0	mRNA HIGH	91	0.211137	mRNA LOW	1	0.00232019	FUSION	0	0	MISSENSE, INFRAME, TRUNCATING MUTATIONS (PUTATIVE DRIVER)	0	0
CREBBP	ALL	40	0.0928074	AMPLIFICATION	1	0.00232019	DEEP DELETION	1	0.00232019	mRNA HIGH	20	0.0464037	mRNA LOW	8	0.0185615	FUSION	0	0	MISSENSE, INFRAME, TRUNCATING MUTATIONS (PUTATIVE DRIVER)	10	0.0232019
CUL2	ALL	45	0.104408	AMPLIFICATION	6	0.0139211	DEEP DELETION	2	0.00464037	mRNA HIGH	22	0.0510441	mRNA LOW	15	0.0348028	FUSION	0	0	MISSENSE, INFRAME, TRUNCATING MUTATIONS (PUTATIVE DRIVER)	0	0
CXCR4	ALL	12	0.0278422	AMPLIFICATION	0	0	DEEP DELETION	1	0.00232019	mRNA HIGH	11	0.025522	mRNA LOW	0	0	FUSION	0	0	MISSENSE, INFRAME, TRUNCATING MUTATIONS (PUTATIVE DRIVER)	0	0
CYBB	ALL	25	0.0580046	AMPLIFICATION	0	0	DEEP DELETION	12	0.0278422	mRNA HIGH	13	0.0301624	mRNA LOW	0	0	FUSION	0	0	MISSENSE, INFRAME, TRUNCATING MUTATIONS (PUTATIVE DRIVER)	0	0
CYP1A1	ALL	4	0.00928074	AMPLIFICATION	0	0	DEEP DELETION	0	0	mRNA HIGH	4	0.00928074	mRNA LOW	0	0	FUSION	0	0	MISSENSE, INFRAME, TRUNCATING MUTATIONS (PUTATIVE DRIVER)	0	0
DDIT4	ALL	24	0.0556845	AMPLIFICATION	2	0.00464037	DEEP DELETION	0	0	mRNA HIGH	22	0.0510441	mRNA LOW	0	0	FUSION	0	0	MISSENSE, INFRAME, TRUNCATING MUTATIONS (PUTATIVE DRIVER)	0	0
DPP4	ALL	27	0.062645	AMPLIFICATION	2	0.00464037	DEEP DELETION	1	0.00232019	mRNA HIGH	24	0.0556845	mRNA LOW	0	0	FUSION	0	0	MISSENSE, INFRAME, TRUNCATING MUTATIONS (PUTATIVE DRIVER)	0	0
E2F1	ALL	52	0.12065	AMPLIFICATION	17	0.0394432	DEEP DELETION	0	0	mRNA HIGH	35	0.0812065	mRNA LOW	0	0	FUSION	0	0	MISSENSE, INFRAME, TRUNCATING MUTATIONS (PUTATIVE DRIVER)	0	0
EDN1	ALL	21	0.0487239	AMPLIFICATION	2	0.00464037	DEEP DELETION	0	0	mRNA HIGH	19	0.0440835	mRNA LOW	0	0	FUSION	0	0	MISSENSE, INFRAME, TRUNCATING MUTATIONS (PUTATIVE DRIVER)	0	0
EDNRA	ALL	30	0.0696056	AMPLIFICATION	1	0.00232019	DEEP DELETION	2	0.00464037	mRNA HIGH	27	0.062645	mRNA LOW	0	0	FUSION	0	0	MISSENSE, INFRAME, TRUNCATING MUTATIONS (PUTATIVE DRIVER)	0	0
EDNRB	ALL	20	0.0464037	AMPLIFICATION	3	0.00696056	DEEP DELETION	3	0.00696056	mRNA HIGH	14	0.0324826	mRNA LOW	0	0	FUSION	0	0	MISSENSE, INFRAME, TRUNCATING MUTATIONS (PUTATIVE DRIVER)	0	0
EGF	ALL	21	0.0487239	AMPLIFICATION	0	0	DEEP DELETION	0	0	mRNA HIGH	21	0.0487239	mRNA LOW	0	0	FUSION	0	0	MISSENSE, INFRAME, TRUNCATING MUTATIONS (PUTATIVE DRIVER)	0	0
EGFR	ALL	114	0.264501	AMPLIFICATION	46	0.106729	DEEP DELETION	0	0	mRNA HIGH	63	0.146172	mRNA LOW	0	0	FUSION	2	0.00464037	MISSENSE, INFRAME, TRUNCATING MUTATIONS (PUTATIVE DRIVER)	3	0.00696056
EGLN1	ALL	31	0.0719258	AMPLIFICATION	2	0.00464037	DEEP DELETION	0	0	mRNA HIGH	28	0.0649652	mRNA LOW	0	0	FUSION	1	0.00232019	MISSENSE, INFRAME, TRUNCATING MUTATIONS (PUTATIVE DRIVER)	0	0
EGLN2	ALL	22	0.0510441	AMPLIFICATION	2	0.00464037	DEEP DELETION	0	0	mRNA HIGH	20	0.0464037	mRNA LOW	0	0	FUSION	0	0	MISSENSE, INFRAME, TRUNCATING MUTATIONS (PUTATIVE DRIVER)	0	0
EGLN3	ALL	29	0.0672854	AMPLIFICATION	4	0.00928074	DEEP DELETION	0	0	mRNA HIGH	25	0.0580046	mRNA LOW	0	0	FUSION	0	0	MISSENSE, INFRAME, TRUNCATING MUTATIONS (PUTATIVE DRIVER)	0	0
EIF4E	ALL	13	0.0301624	AMPLIFICATION	0	0	DEEP DELETION	0	0	mRNA HIGH	11	0.025522	mRNA LOW	2	0.00464037	FUSION	0	0	MISSENSE, INFRAME, TRUNCATING MUTATIONS (PUTATIVE DRIVER)	0	0
EIF4E1B	ALL	32	0.0742459	AMPLIFICATION	0	0	DEEP DELETION	1	0.00232019	mRNA HIGH	31	0.0719258	mRNA LOW	0	0	FUSION	0	0	MISSENSE, INFRAME, TRUNCATING MUTATIONS (PUTATIVE DRIVER)	0	0
EIF4E2	ALL	24	0.0556845	AMPLIFICATION	0	0	DEEP DELETION	6	0.0139211	mRNA HIGH	18	0.0417633	mRNA LOW	0	0	FUSION	0	0	MISSENSE, INFRAME, TRUNCATING MUTATIONS (PUTATIVE DRIVER)	0	0
EIF4EBP1	ALL	50	0.116009	AMPLIFICATION	24	0.0556845	DEEP DELETION	7	0.0162413	mRNA HIGH	18	0.0417633	mRNA LOW	0	0	FUSION	1	0.00232019	MISSENSE, INFRAME, TRUNCATING MUTATIONS (PUTATIVE DRIVER)	0	0
ELF2	ALL	18	0.0417633	AMPLIFICATION	0	0	DEEP DELETION	1	0.00232019	mRNA HIGH	16	0.037123	mRNA LOW	1	0.00232019	FUSION	0	0	MISSENSE, INFRAME, TRUNCATING MUTATIONS (PUTATIVE DRIVER)	0	0
ELOB	ALL	18	0.0417633	AMPLIFICATION	1	0.00232019	DEEP DELETION	0	0	mRNA HIGH	17	0.0394432	mRNA LOW	0	0	FUSION	0	0	MISSENSE, INFRAME, TRUNCATING MUTATIONS (PUTATIVE DRIVER)	0	0
ELOC	ALL	73	0.169374	AMPLIFICATION	15	0.0348028	DEEP DELETION	0	0	mRNA HIGH	58	0.134571	mRNA LOW	0	0	FUSION	0	0	MISSENSE, INFRAME, TRUNCATING MUTATIONS (PUTATIVE DRIVER)	0	0
ENG	ALL	21	0.0487239	AMPLIFICATION	3	0.00696056	DEEP DELETION	0	0	mRNA HIGH	17	0.0394432	mRNA LOW	0	0	FUSION	1	0.00232019	MISSENSE, INFRAME, TRUNCATING MUTATIONS (PUTATIVE DRIVER)	0	0
ENO1	ALL	24	0.0556845	AMPLIFICATION	1	0.00232019	DEEP DELETION	2	0.00464037	mRNA HIGH	18	0.0417633	mRNA LOW	3	0.00696056	FUSION	0	0	MISSENSE, INFRAME, TRUNCATING MUTATIONS (PUTATIVE DRIVER)	0	0
ENO2	ALL	34	0.0788863	AMPLIFICATION	5	0.0116009	DEEP DELETION	0	0	mRNA HIGH	29	0.0672854	mRNA LOW	0	0	FUSION	0	0	MISSENSE, INFRAME, TRUNCATING MUTATIONS (PUTATIVE DRIVER)	0	0
ENO3	ALL	11	0.025522	AMPLIFICATION	1	0.00232019	DEEP DELETION	2	0.00464037	mRNA HIGH	8	0.0185615	mRNA LOW	0	0	FUSION	0	0	MISSENSE, INFRAME, TRUNCATING MUTATIONS (PUTATIVE DRIVER)	0	0
ENO4	ALL	0	0	AMPLIFICATION	0	0	DEEP DELETION	0	0	mRNA HIGH	0	0	mRNA LOW	0	0	FUSION	0	0	MISSENSE, INFRAME, TRUNCATING MUTATIONS (PUTATIVE DRIVER)	0	0
EP300	ALL	41	0.0951276	AMPLIFICATION	1	0.00232019	DEEP DELETION	0	0	mRNA HIGH	12	0.0278422	mRNA LOW	9	0.0208817	FUSION	0	0	MISSENSE, INFRAME, TRUNCATING MUTATIONS (PUTATIVE DRIVER)	19	0.0440835
EPAS1	ALL	19	0.0440835	AMPLIFICATION	1	0.00232019	DEEP DELETION	0	0	mRNA HIGH	18	0.0417633	mRNA LOW	0	0	FUSION	0	0	MISSENSE, INFRAME, TRUNCATING MUTATIONS (PUTATIVE DRIVER)	0	0
EPO	ALL	44	0.102088	AMPLIFICATION	15	0.0348028	DEEP DELETION	0	0	mRNA HIGH	29	0.0672854	mRNA LOW	0	0	FUSION	0	0	MISSENSE, INFRAME, TRUNCATING MUTATIONS (PUTATIVE DRIVER)	0	0
ERBB2	ALL	25	0.0580046	AMPLIFICATION	7	0.0162413	DEEP DELETION	0	0	mRNA HIGH	17	0.0394432	mRNA LOW	0	0	FUSION	0	0	MISSENSE, INFRAME, TRUNCATING MUTATIONS (PUTATIVE DRIVER)	1	0.00232019
ETS1	ALL	22	0.0510441	AMPLIFICATION	2	0.00464037	DEEP DELETION	3	0.00696056	mRNA HIGH	17	0.0394432	mRNA LOW	0	0	FUSION	0	0	MISSENSE, INFRAME, TRUNCATING MUTATIONS (PUTATIVE DRIVER)	0	0
FLT1	ALL	20	0.0464037	AMPLIFICATION	0	0	DEEP DELETION	1	0.00232019	mRNA HIGH	19	0.0440835	mRNA LOW	0	0	FUSION	0	0	MISSENSE, INFRAME, TRUNCATING MUTATIONS (PUTATIVE DRIVER)	0	0
GAPDH	ALL	41	0.0951276	AMPLIFICATION	5	0.0116009	DEEP DELETION	0	0	mRNA HIGH	35	0.0812065	mRNA LOW	0	0	FUSION	1	0.00232019	MISSENSE, INFRAME, TRUNCATING MUTATIONS (PUTATIVE DRIVER)	0	0
GATA6	ALL	25	0.0580046	AMPLIFICATION	8	0.0185615	DEEP DELETION	0	0	mRNA HIGH	17	0.0394432	mRNA LOW	0	0	FUSION	0	0	MISSENSE, INFRAME, TRUNCATING MUTATIONS (PUTATIVE DRIVER)	0	0
HBB	ALL	7	0.0162413	AMPLIFICATION	0	0	DEEP DELETION	1	0.00232019	mRNA HIGH	6	0.0139211	mRNA LOW	0	0	FUSION	0	0	MISSENSE, INFRAME, TRUNCATING MUTATIONS (PUTATIVE DRIVER)	0	0
HBG2	ALL	8	0.0185615	AMPLIFICATION	0	0	DEEP DELETION	1	0.00232019	mRNA HIGH	7	0.0162413	mRNA LOW	0	0	FUSION	0	0	MISSENSE, INFRAME, TRUNCATING MUTATIONS (PUTATIVE DRIVER)	0	0
HIF1A	ALL	30	0.0696056	AMPLIFICATION	4	0.00928074	DEEP DELETION	0	0	mRNA HIGH	26	0.0603248	mRNA LOW	0	0	FUSION	0	0	MISSENSE, INFRAME, TRUNCATING MUTATIONS (PUTATIVE DRIVER)	0	0
HIF3A	ALL	12	0.0278422	AMPLIFICATION	0	0	DEEP DELETION	0	0	mRNA HIGH	12	0.0278422	mRNA LOW	0	0	FUSION	0	0	MISSENSE, INFRAME, TRUNCATING MUTATIONS (PUTATIVE DRIVER)	0	0
HK1	ALL	25	0.0580046	AMPLIFICATION	2	0.00464037	DEEP DELETION	0	0	mRNA HIGH	21	0.0487239	mRNA LOW	2	0.00464037	FUSION	0	0	MISSENSE, INFRAME, TRUNCATING MUTATIONS (PUTATIVE DRIVER)	0	0
HK2	ALL	22	0.0510441	AMPLIFICATION	1	0.00232019	DEEP DELETION	0	0	mRNA HIGH	21	0.0487239	mRNA LOW	0	0	FUSION	0	0	MISSENSE, INFRAME, TRUNCATING MUTATIONS (PUTATIVE DRIVER)	0	0
HK3	ALL	20	0.0464037	AMPLIFICATION	0	0	DEEP DELETION	1	0.00232019	mRNA HIGH	19	0.0440835	mRNA LOW	0	0	FUSION	0	0	MISSENSE, INFRAME, TRUNCATING MUTATIONS (PUTATIVE DRIVER)	0	0
HKDC1	ALL	25	0.0580046	AMPLIFICATION	2	0.00464037	DEEP DELETION	0	0	mRNA HIGH	23	0.0533643	mRNA LOW	0	0	FUSION	0	0	MISSENSE, INFRAME, TRUNCATING MUTATIONS (PUTATIVE DRIVER)	0	0
HMBS	ALL	13	0.0301624	AMPLIFICATION	0	0	DEEP DELETION	2	0.00464037	mRNA HIGH	11	0.025522	mRNA LOW	0	0	FUSION	0	0	MISSENSE, INFRAME, TRUNCATING MUTATIONS (PUTATIVE DRIVER)	0	0
HMOX1	ALL	21	0.0487239	AMPLIFICATION	1	0.00232019	DEEP DELETION	1	0.00232019	mRNA HIGH	19	0.0440835	mRNA LOW	0	0	FUSION	0	0	MISSENSE, INFRAME, TRUNCATING MUTATIONS (PUTATIVE DRIVER)	0	0
HMOX2	ALL	20	0.0464037	AMPLIFICATION	1	0.00232019	DEEP DELETION	0	0	mRNA HIGH	19	0.0440835	mRNA LOW	0	0	FUSION	0	0	MISSENSE, INFRAME, TRUNCATING MUTATIONS (PUTATIVE DRIVER)	0	0
HSP90B1	ALL	27	0.062645	AMPLIFICATION	0	0	DEEP DELETION	1	0.00232019	mRNA HIGH	26	0.0603248	mRNA LOW	0	0	FUSION	0	0	MISSENSE, INFRAME, TRUNCATING MUTATIONS (PUTATIVE DRIVER)	0	0
HYOU1	ALL	20	0.0464037	AMPLIFICATION	0	0	DEEP DELETION	2	0.00464037	mRNA HIGH	18	0.0417633	mRNA LOW	0	0	FUSION	0	0	MISSENSE, INFRAME, TRUNCATING MUTATIONS (PUTATIVE DRIVER)	0	0
IFNG	ALL	29	0.0672854	AMPLIFICATION	16	0.037123	DEEP DELETION	1	0.00232019	mRNA HIGH	12	0.0278422	mRNA LOW	0	0	FUSION	0	0	MISSENSE, INFRAME, TRUNCATING MUTATIONS (PUTATIVE DRIVER)	0	0
IFNGR1	ALL	31	0.0719258	AMPLIFICATION	2	0.00464037	DEEP DELETION	1	0.00232019	mRNA HIGH	27	0.062645	mRNA LOW	1	0.00232019	FUSION	0	0	MISSENSE, INFRAME, TRUNCATING MUTATIONS (PUTATIVE DRIVER)	0	0
IFNGR2	ALL	25	0.0580046	AMPLIFICATION	5	0.0116009	DEEP DELETION	0	0	mRNA HIGH	16	0.037123	mRNA LOW	3	0.00696056	FUSION	1	0.00232019	MISSENSE, INFRAME, TRUNCATING MUTATIONS (PUTATIVE DRIVER)	0	0
IGF1	ALL	15	0.0348028	AMPLIFICATION	1	0.00232019	DEEP DELETION	2	0.00464037	mRNA HIGH	12	0.0278422	mRNA LOW	0	0	FUSION	0	0	MISSENSE, INFRAME, TRUNCATING MUTATIONS (PUTATIVE DRIVER)	0	0
IGF1R	ALL	41	0.0951276	AMPLIFICATION	4	0.00928074	DEEP DELETION	1	0.00232019	mRNA HIGH	35	0.0812065	mRNA LOW	0	0	FUSION	1	0.00232019	MISSENSE, INFRAME, TRUNCATING MUTATIONS (PUTATIVE DRIVER)	0	0
IGFBP1	ALL	21	0.0487239	AMPLIFICATION	9	0.0208817	DEEP DELETION	0	0	mRNA HIGH	12	0.0278422	mRNA LOW	0	0	FUSION	0	0	MISSENSE, INFRAME, TRUNCATING MUTATIONS (PUTATIVE DRIVER)	0	0
IGFBP2	ALL	26	0.0603248	AMPLIFICATION	0	0	DEEP DELETION	5	0.0116009	mRNA HIGH	21	0.0487239	mRNA LOW	0	0	FUSION	0	0	MISSENSE, INFRAME, TRUNCATING MUTATIONS (PUTATIVE DRIVER)	0	0
IL1A	ALL	22	0.0510441	AMPLIFICATION	5	0.0116009	DEEP DELETION	0	0	mRNA HIGH	17	0.0394432	mRNA LOW	0	0	FUSION	0	0	MISSENSE, INFRAME, TRUNCATING MUTATIONS (PUTATIVE DRIVER)	0	0
IL1B	ALL	14	0.0324826	AMPLIFICATION	5	0.0116009	DEEP DELETION	0	0	mRNA HIGH	9	0.0208817	mRNA LOW	0	0	FUSION	0	0	MISSENSE, INFRAME, TRUNCATING MUTATIONS (PUTATIVE DRIVER)	0	0
IL6	ALL	19	0.0440835	AMPLIFICATION	6	0.0139211	DEEP DELETION	0	0	mRNA HIGH	13	0.0301624	mRNA LOW	0	0	FUSION	0	0	MISSENSE, INFRAME, TRUNCATING MUTATIONS (PUTATIVE DRIVER)	0	0
IL6R	ALL	26	0.0603248	AMPLIFICATION	3	0.00696056	DEEP DELETION	0	0	mRNA HIGH	23	0.0533643	mRNA LOW	0	0	FUSION	0	0	MISSENSE, INFRAME, TRUNCATING MUTATIONS (PUTATIVE DRIVER)	0	0
INS	ALL	2	0.00464037	AMPLIFICATION	0	0	DEEP DELETION	1	0.00232019	mRNA HIGH	1	0.00232019	mRNA LOW	0	0	FUSION	0	0	MISSENSE, INFRAME, TRUNCATING MUTATIONS (PUTATIVE DRIVER)	0	0
INSR	ALL	18	0.0417633	AMPLIFICATION	0	0	DEEP DELETION	3	0.00696056	mRNA HIGH	15	0.0348028	mRNA LOW	0	0	FUSION	0	0	MISSENSE, INFRAME, TRUNCATING MUTATIONS (PUTATIVE DRIVER)	0	0
ITPR1	ALL	17	0.0394432	AMPLIFICATION	0	0	DEEP DELETION	4	0.00928074	mRNA HIGH	13	0.0301624	mRNA LOW	0	0	FUSION	0	0	MISSENSE, INFRAME, TRUNCATING MUTATIONS (PUTATIVE DRIVER)	0	0
ITPR2	ALL	33	0.0765661	AMPLIFICATION	8	0.0185615	DEEP DELETION	1	0.00232019	mRNA HIGH	24	0.0556845	mRNA LOW	0	0	FUSION	0	0	MISSENSE, INFRAME, TRUNCATING MUTATIONS (PUTATIVE DRIVER)	0	0
KCNK3	ALL	4	0.00928074	AMPLIFICATION	0	0	DEEP DELETION	0	0	mRNA HIGH	4	0.00928074	mRNA LOW	0	0	FUSION	0	0	MISSENSE, INFRAME, TRUNCATING MUTATIONS (PUTATIVE DRIVER)	0	0
KCNMA1	ALL	31	0.0719258	AMPLIFICATION	2	0.00464037	DEEP DELETION	3	0.00696056	mRNA HIGH	26	0.0603248	mRNA LOW	0	0	FUSION	0	0	MISSENSE, INFRAME, TRUNCATING MUTATIONS (PUTATIVE DRIVER)	0	0
LDHA	ALL	23	0.0533643	AMPLIFICATION	1	0.00232019	DEEP DELETION	0	0	mRNA HIGH	21	0.0487239	mRNA LOW	1	0.00232019	FUSION	0	0	MISSENSE, INFRAME, TRUNCATING MUTATIONS (PUTATIVE DRIVER)	0	0
LDHAL6A	ALL	3	0.00696056	AMPLIFICATION	0	0	DEEP DELETION	0	0	mRNA HIGH	3	0.00696056	mRNA LOW	0	0	FUSION	0	0	MISSENSE, INFRAME, TRUNCATING MUTATIONS (PUTATIVE DRIVER)	0	0
LDHAL6B	ALL	14	0.0324826	AMPLIFICATION	0	0	DEEP DELETION	0	0	mRNA HIGH	14	0.0324826	mRNA LOW	0	0	FUSION	0	0	MISSENSE, INFRAME, TRUNCATING MUTATIONS (PUTATIVE DRIVER)	0	0
LDHB	ALL	56	0.12993	AMPLIFICATION	5	0.0116009	DEEP DELETION	1	0.00232019	mRNA HIGH	50	0.116009	mRNA LOW	0	0	FUSION	0	0	MISSENSE, INFRAME, TRUNCATING MUTATIONS (PUTATIVE DRIVER)	0	0
LDHC	ALL	14	0.0324826	AMPLIFICATION	1	0.00232019	DEEP DELETION	0	0	mRNA HIGH	13	0.0301624	mRNA LOW	0	0	FUSION	0	0	MISSENSE, INFRAME, TRUNCATING MUTATIONS (PUTATIVE DRIVER)	0	0
LMNA	ALL	16	0.037123	AMPLIFICATION	4	0.00928074	DEEP DELETION	0	0	mRNA HIGH	12	0.0278422	mRNA LOW	0	0	FUSION	0	0	MISSENSE, INFRAME, TRUNCATING MUTATIONS (PUTATIVE DRIVER)	0	0
LTBR	ALL	43	0.099768	AMPLIFICATION	5	0.0116009	DEEP DELETION	0	0	mRNA HIGH	38	0.0881671	mRNA LOW	0	0	FUSION	0	0	MISSENSE, INFRAME, TRUNCATING MUTATIONS (PUTATIVE DRIVER)	0	0
MAP2K1	ALL	31	0.0719258	AMPLIFICATION	0	0	DEEP DELETION	0	0	mRNA HIGH	27	0.062645	mRNA LOW	3	0.00696056	FUSION	0	0	MISSENSE, INFRAME, TRUNCATING MUTATIONS (PUTATIVE DRIVER)	1	0.00232019
MAP2K2	ALL	22	0.0510441	AMPLIFICATION	1	0.00232019	DEEP DELETION	2	0.00464037	mRNA HIGH	17	0.0394432	mRNA LOW	0	0	FUSION	1	0.00232019	MISSENSE, INFRAME, TRUNCATING MUTATIONS (PUTATIVE DRIVER)	1	0.00232019
MAPK1	ALL	72	0.167053	AMPLIFICATION	9	0.0208817	DEEP DELETION	1	0.00232019	mRNA HIGH	40	0.0928074	mRNA LOW	13	0.0301624	FUSION	2	0.00464037	MISSENSE, INFRAME, TRUNCATING MUTATIONS (PUTATIVE DRIVER)	7	0.0162413
MAPK3	ALL	24	0.0556845	AMPLIFICATION	1	0.00232019	DEEP DELETION	0	0	mRNA HIGH	22	0.0510441	mRNA LOW	1	0.00232019	FUSION	0	0	MISSENSE, INFRAME, TRUNCATING MUTATIONS (PUTATIVE DRIVER)	0	0
MDM2	ALL	41	0.0951276	AMPLIFICATION	14	0.0324826	DEEP DELETION	1	0.00232019	mRNA HIGH	26	0.0603248	mRNA LOW	0	0	FUSION	0	0	MISSENSE, INFRAME, TRUNCATING MUTATIONS (PUTATIVE DRIVER)	0	0
MDM4	ALL	20	0.0464037	AMPLIFICATION	1	0.00232019	DEEP DELETION	0	0	mRNA HIGH	19	0.0440835	mRNA LOW	0	0	FUSION	0	0	MISSENSE, INFRAME, TRUNCATING MUTATIONS (PUTATIVE DRIVER)	0	0
MKNK1	ALL	29	0.0672854	AMPLIFICATION	0	0	DEEP DELETION	0	0	mRNA HIGH	28	0.0649652	mRNA LOW	1	0.00232019	FUSION	0	0	MISSENSE, INFRAME, TRUNCATING MUTATIONS (PUTATIVE DRIVER)	0	0
MKNK2	ALL	18	0.0417633	AMPLIFICATION	0	0	DEEP DELETION	1	0.00232019	mRNA HIGH	17	0.0394432	mRNA LOW	0	0	FUSION	0	0	MISSENSE, INFRAME, TRUNCATING MUTATIONS (PUTATIVE DRIVER)	0	0
MMP14	ALL	25	0.0580046	AMPLIFICATION	4	0.00928074	DEEP DELETION	1	0.00232019	mRNA HIGH	20	0.0464037	mRNA LOW	0	0	FUSION	0	0	MISSENSE, INFRAME, TRUNCATING MUTATIONS (PUTATIVE DRIVER)	0	0
MMP2	ALL	20	0.0464037	AMPLIFICATION	2	0.00464037	DEEP DELETION	0	0	mRNA HIGH	18	0.0417633	mRNA LOW	0	0	FUSION	0	0	MISSENSE, INFRAME, TRUNCATING MUTATIONS (PUTATIVE DRIVER)	0	0
MMP3	ALL	35	0.0812065	AMPLIFICATION	20	0.0464037	DEEP DELETION	2	0.00464037	mRNA HIGH	13	0.0301624	mRNA LOW	0	0	FUSION	0	0	MISSENSE, INFRAME, TRUNCATING MUTATIONS (PUTATIVE DRIVER)	0	0
MT3	ALL	11	0.025522	AMPLIFICATION	2	0.00464037	DEEP DELETION	0	0	mRNA HIGH	9	0.0208817	mRNA LOW	0	0	FUSION	0	0	MISSENSE, INFRAME, TRUNCATING MUTATIONS (PUTATIVE DRIVER)	0	0
MTOR	ALL	33	0.0765661	AMPLIFICATION	0	0	DEEP DELETION	1	0.00232019	mRNA HIGH	22	0.0510441	mRNA LOW	10	0.0232019	FUSION	0	0	MISSENSE, INFRAME, TRUNCATING MUTATIONS (PUTATIVE DRIVER)	0	0
NDRG1	ALL	122	0.283063	AMPLIFICATION	33	0.0765661	DEEP DELETION	0	0	mRNA HIGH	89	0.206497	mRNA LOW	0	0	FUSION	0	0	MISSENSE, INFRAME, TRUNCATING MUTATIONS (PUTATIVE DRIVER)	0	0
NFKB1	ALL	26	0.0603248	AMPLIFICATION	0	0	DEEP DELETION	0	0	mRNA HIGH	14	0.0324826	mRNA LOW	12	0.0278422	FUSION	0	0	MISSENSE, INFRAME, TRUNCATING MUTATIONS (PUTATIVE DRIVER)	0	0
NOS1	ALL	27	0.062645	AMPLIFICATION	2	0.00464037	DEEP DELETION	0	0	mRNA HIGH	25	0.0580046	mRNA LOW	0	0	FUSION	0	0	MISSENSE, INFRAME, TRUNCATING MUTATIONS (PUTATIVE DRIVER)	0	0
NOS2	ALL	8	0.0185615	AMPLIFICATION	2	0.00464037	DEEP DELETION	0	0	mRNA HIGH	6	0.0139211	mRNA LOW	0	0	FUSION	0	0	MISSENSE, INFRAME, TRUNCATING MUTATIONS (PUTATIVE DRIVER)	0	0
NOS3	ALL	19	0.0440835	AMPLIFICATION	1	0.00232019	DEEP DELETION	3	0.00696056	mRNA HIGH	15	0.0348028	mRNA LOW	0	0	FUSION	0	0	MISSENSE, INFRAME, TRUNCATING MUTATIONS (PUTATIVE DRIVER)	0	0
NOTCH1	ALL	78	0.180974	AMPLIFICATION	3	0.00696056	DEEP DELETION	9	0.0208817	mRNA HIGH	21	0.0487239	mRNA LOW	0	0	FUSION	2	0.00464037	MISSENSE, INFRAME, TRUNCATING MUTATIONS (PUTATIVE DRIVER)	43	0.099768
NPEPPS	ALL	30	0.0696056	AMPLIFICATION	1	0.00232019	DEEP DELETION	0	0	mRNA HIGH	29	0.0672854	mRNA LOW	0	0	FUSION	0	0	MISSENSE, INFRAME, TRUNCATING MUTATIONS (PUTATIVE DRIVER)	0	0
NPPA	ALL	7	0.0162413	AMPLIFICATION	0	0	DEEP DELETION	1	0.00232019	mRNA HIGH	6	0.0139211	mRNA LOW	0	0	FUSION	0	0	MISSENSE, INFRAME, TRUNCATING MUTATIONS (PUTATIVE DRIVER)	0	0
NPPB	ALL	6	0.0139211	AMPLIFICATION	0	0	DEEP DELETION	1	0.00232019	mRNA HIGH	5	0.0116009	mRNA LOW	0	0	FUSION	0	0	MISSENSE, INFRAME, TRUNCATING MUTATIONS (PUTATIVE DRIVER)	0	0
NR4A2	ALL	21	0.0487239	AMPLIFICATION	4	0.00928074	DEEP DELETION	0	0	mRNA HIGH	16	0.037123	mRNA LOW	0	0	FUSION	1	0.00232019	MISSENSE, INFRAME, TRUNCATING MUTATIONS (PUTATIVE DRIVER)	0	0
NRP1	ALL	22	0.0510441	AMPLIFICATION	2	0.00464037	DEEP DELETION	0	0	mRNA HIGH	20	0.0464037	mRNA LOW	0	0	FUSION	0	0	MISSENSE, INFRAME, TRUNCATING MUTATIONS (PUTATIVE DRIVER)	0	0
NRP2	ALL	36	0.0835267	AMPLIFICATION	1	0.00232019	DEEP DELETION	6	0.0139211	mRNA HIGH	27	0.062645	mRNA LOW	0	0	FUSION	2	0.00464037	MISSENSE, INFRAME, TRUNCATING MUTATIONS (PUTATIVE DRIVER)	0	0
OS9	ALL	28	0.0649652	AMPLIFICATION	2	0.00464037	DEEP DELETION	0	0	mRNA HIGH	19	0.0440835	mRNA LOW	6	0.0139211	FUSION	1	0.00232019	MISSENSE, INFRAME, TRUNCATING MUTATIONS (PUTATIVE DRIVER)	0	0
PAM	ALL	14	0.0324826	AMPLIFICATION	0	0	DEEP DELETION	4	0.00928074	mRNA HIGH	10	0.0232019	mRNA LOW	0	0	FUSION	0	0	MISSENSE, INFRAME, TRUNCATING MUTATIONS (PUTATIVE DRIVER)	0	0
PDE5A	ALL	4	0.00928074	AMPLIFICATION	0	0	DEEP DELETION	0	0	mRNA HIGH	3	0.00696056	mRNA LOW	0	0	FUSION	1	0.00232019	MISSENSE, INFRAME, TRUNCATING MUTATIONS (PUTATIVE DRIVER)	0	0
PDGFB	ALL	27	0.062645	AMPLIFICATION	0	0	DEEP DELETION	0	0	mRNA HIGH	27	0.062645	mRNA LOW	0	0	FUSION	0	0	MISSENSE, INFRAME, TRUNCATING MUTATIONS (PUTATIVE DRIVER)	0	0
PDHA1	ALL	22	0.0510441	AMPLIFICATION	1	0.00232019	DEEP DELETION	8	0.0185615	mRNA HIGH	13	0.0301624	mRNA LOW	0	0	FUSION	0	0	MISSENSE, INFRAME, TRUNCATING MUTATIONS (PUTATIVE DRIVER)	0	0
PDHA2	ALL	20	0.0464037	AMPLIFICATION	0	0	DEEP DELETION	0	0	mRNA HIGH	20	0.0464037	mRNA LOW	0	0	FUSION	0	0	MISSENSE, INFRAME, TRUNCATING MUTATIONS (PUTATIVE DRIVER)	0	0
PDHB	ALL	14	0.0324826	AMPLIFICATION	0	0	DEEP DELETION	1	0.00232019	mRNA HIGH	8	0.0185615	mRNA LOW	5	0.0116009	FUSION	0	0	MISSENSE, INFRAME, TRUNCATING MUTATIONS (PUTATIVE DRIVER)	0	0
PDIA2	ALL	5	0.0116009	AMPLIFICATION	1	0.00232019	DEEP DELETION	0	0	mRNA HIGH	4	0.00928074	mRNA LOW	0	0	FUSION	0	0	MISSENSE, INFRAME, TRUNCATING MUTATIONS (PUTATIVE DRIVER)	0	0
PDK1	ALL	31	0.0719258	AMPLIFICATION	9	0.0208817	DEEP DELETION	0	0	mRNA HIGH	22	0.0510441	mRNA LOW	0	0	FUSION	0	0	MISSENSE, INFRAME, TRUNCATING MUTATIONS (PUTATIVE DRIVER)	0	0
PFKFB3	ALL	21	0.0487239	AMPLIFICATION	2	0.00464037	DEEP DELETION	2	0.00464037	mRNA HIGH	17	0.0394432	mRNA LOW	0	0	FUSION	0	0	MISSENSE, INFRAME, TRUNCATING MUTATIONS (PUTATIVE DRIVER)	0	0
PFKL	ALL	26	0.0603248	AMPLIFICATION	1	0.00232019	DEEP DELETION	3	0.00696056	mRNA HIGH	17	0.0394432	mRNA LOW	5	0.0116009	FUSION	0	0	MISSENSE, INFRAME, TRUNCATING MUTATIONS (PUTATIVE DRIVER)	0	0
PFKM	ALL	6	0.0139211	AMPLIFICATION	0	0	DEEP DELETION	1	0.00232019	mRNA HIGH	5	0.0116009	mRNA LOW	0	0	FUSION	0	0	MISSENSE, INFRAME, TRUNCATING MUTATIONS (PUTATIVE DRIVER)	0	0
PFKP	ALL	20	0.0464037	AMPLIFICATION	1	0.00232019	DEEP DELETION	2	0.00464037	mRNA HIGH	17	0.0394432	mRNA LOW	0	0	FUSION	0	0	MISSENSE, INFRAME, TRUNCATING MUTATIONS (PUTATIVE DRIVER)	0	0
PGF	ALL	21	0.0487239	AMPLIFICATION	2	0.00464037	DEEP DELETION	0	0	mRNA HIGH	19	0.0440835	mRNA LOW	0	0	FUSION	0	0	MISSENSE, INFRAME, TRUNCATING MUTATIONS (PUTATIVE DRIVER)	0	0
PGK1	ALL	24	0.0556845	AMPLIFICATION	2	0.00464037	DEEP DELETION	2	0.00464037	mRNA HIGH	20	0.0464037	mRNA LOW	0	0	FUSION	0	0	MISSENSE, INFRAME, TRUNCATING MUTATIONS (PUTATIVE DRIVER)	0	0
PGK2	ALL	25	0.0580046	AMPLIFICATION	6	0.0139211	DEEP DELETION	0	0	mRNA HIGH	19	0.0440835	mRNA LOW	0	0	FUSION	0	0	MISSENSE, INFRAME, TRUNCATING MUTATIONS (PUTATIVE DRIVER)	0	0
PIK3CA	ALL	269	0.62413	AMPLIFICATION	68	0.157773	DEEP DELETION	0	0	mRNA HIGH	129	0.299304	mRNA LOW	3	0.00696056	FUSION	0	0	MISSENSE, INFRAME, TRUNCATING MUTATIONS (PUTATIVE DRIVER)	69	0.160093
PIK3CB	ALL	84	0.194896	AMPLIFICATION	24	0.0556845	DEEP DELETION	0	0	mRNA HIGH	59	0.136891	mRNA LOW	0	0	FUSION	0	0	MISSENSE, INFRAME, TRUNCATING MUTATIONS (PUTATIVE DRIVER)	1	0.00232019
PIK3CD	ALL	12	0.0278422	AMPLIFICATION	1	0.00232019	DEEP DELETION	3	0.00696056	mRNA HIGH	8	0.0185615	mRNA LOW	0	0	FUSION	0	0	MISSENSE, INFRAME, TRUNCATING MUTATIONS (PUTATIVE DRIVER)	0	0
PIK3CG	ALL	20	0.0464037	AMPLIFICATION	6	0.0139211	DEEP DELETION	0	0	mRNA HIGH	14	0.0324826	mRNA LOW	0	0	FUSION	0	0	MISSENSE, INFRAME, TRUNCATING MUTATIONS (PUTATIVE DRIVER)	0	0
PIK3R1	ALL	18	0.0417633	AMPLIFICATION	0	0	DEEP DELETION	3	0.00696056	mRNA HIGH	12	0.0278422	mRNA LOW	0	0	FUSION	0	0	MISSENSE, INFRAME, TRUNCATING MUTATIONS (PUTATIVE DRIVER)	3	0.00696056
PIK3R2	ALL	19	0.0440835	AMPLIFICATION	2	0.00464037	DEEP DELETION	0	0	mRNA HIGH	16	0.037123	mRNA LOW	1	0.00232019	FUSION	0	0	MISSENSE, INFRAME, TRUNCATING MUTATIONS (PUTATIVE DRIVER)	0	0
PIK3R3	ALL	14	0.0324826	AMPLIFICATION	0	0	DEEP DELETION	0	0	mRNA HIGH	13	0.0301624	mRNA LOW	0	0	FUSION	1	0.00232019	MISSENSE, INFRAME, TRUNCATING MUTATIONS (PUTATIVE DRIVER)	0	0
PKLR	ALL	20	0.0464037	AMPLIFICATION	3	0.00696056	DEEP DELETION	0	0	mRNA HIGH	17	0.0394432	mRNA LOW	0	0	FUSION	0	0	MISSENSE, INFRAME, TRUNCATING MUTATIONS (PUTATIVE DRIVER)	0	0
PLCG1	ALL	48	0.111369	AMPLIFICATION	1	0.00232019	DEEP DELETION	1	0.00232019	mRNA HIGH	41	0.0951276	mRNA LOW	5	0.0116009	FUSION	0	0	MISSENSE, INFRAME, TRUNCATING MUTATIONS (PUTATIVE DRIVER)	0	0
PLCG2	ALL	17	0.0394432	AMPLIFICATION	0	0	DEEP DELETION	0	0	mRNA HIGH	17	0.0394432	mRNA LOW	0	0	FUSION	0	0	MISSENSE, INFRAME, TRUNCATING MUTATIONS (PUTATIVE DRIVER)	0	0
PLOD1	ALL	24	0.0556845	AMPLIFICATION	0	0	DEEP DELETION	1	0.00232019	mRNA HIGH	23	0.0533643	mRNA LOW	0	0	FUSION	0	0	MISSENSE, INFRAME, TRUNCATING MUTATIONS (PUTATIVE DRIVER)	0	0
PLOD2	ALL	60	0.139211	AMPLIFICATION	30	0.0696056	DEEP DELETION	0	0	mRNA HIGH	30	0.0696056	mRNA LOW	0	0	FUSION	0	0	MISSENSE, INFRAME, TRUNCATING MUTATIONS (PUTATIVE DRIVER)	0	0
PMAIP1	ALL	32	0.0742459	AMPLIFICATION	0	0	DEEP DELETION	16	0.037123	mRNA HIGH	15	0.0348028	mRNA LOW	0	0	FUSION	0	0	MISSENSE, INFRAME, TRUNCATING MUTATIONS (PUTATIVE DRIVER)	1	0.00232019
PML	ALL	29	0.0672854	AMPLIFICATION	0	0	DEEP DELETION	0	0	mRNA HIGH	29	0.0672854	mRNA LOW	0	0	FUSION	0	0	MISSENSE, INFRAME, TRUNCATING MUTATIONS (PUTATIVE DRIVER)	0	0
POLR2A	ALL	18	0.0417633	AMPLIFICATION	1	0.00232019	DEEP DELETION	2	0.00464037	mRNA HIGH	13	0.0301624	mRNA LOW	2	0.00464037	FUSION	0	0	MISSENSE, INFRAME, TRUNCATING MUTATIONS (PUTATIVE DRIVER)	0	0
PPARA	ALL	21	0.0487239	AMPLIFICATION	1	0.00232019	DEEP DELETION	0	0	mRNA HIGH	20	0.0464037	mRNA LOW	0	0	FUSION	0	0	MISSENSE, INFRAME, TRUNCATING MUTATIONS (PUTATIVE DRIVER)	0	0
PRKAA1	ALL	78	0.180974	AMPLIFICATION	17	0.0394432	DEEP DELETION	0	0	mRNA HIGH	55	0.12761	mRNA LOW	6	0.0139211	FUSION	0	0	MISSENSE, INFRAME, TRUNCATING MUTATIONS (PUTATIVE DRIVER)	0	0
PRKAA2	ALL	7	0.0162413	AMPLIFICATION	2	0.00464037	DEEP DELETION	0	0	mRNA HIGH	5	0.0116009	mRNA LOW	0	0	FUSION	0	0	MISSENSE, INFRAME, TRUNCATING MUTATIONS (PUTATIVE DRIVER)	0	0
PRKCA	ALL	29	0.0672854	AMPLIFICATION	0	0	DEEP DELETION	0	0	mRNA HIGH	29	0.0672854	mRNA LOW	0	0	FUSION	0	0	MISSENSE, INFRAME, TRUNCATING MUTATIONS (PUTATIVE DRIVER)	0	0
PRKCB	ALL	13	0.0301624	AMPLIFICATION	0	0	DEEP DELETION	1	0.00232019	mRNA HIGH	12	0.0278422	mRNA LOW	0	0	FUSION	0	0	MISSENSE, INFRAME, TRUNCATING MUTATIONS (PUTATIVE DRIVER)	0	0
PRKCG	ALL	9	0.0208817	AMPLIFICATION	1	0.00232019	DEEP DELETION	0	0	mRNA HIGH	7	0.0162413	mRNA LOW	0	0	FUSION	1	0.00232019	MISSENSE, INFRAME, TRUNCATING MUTATIONS (PUTATIVE DRIVER)	0	0
PSEN2	ALL	28	0.0649652	AMPLIFICATION	1	0.00232019	DEEP DELETION	0	0	mRNA HIGH	27	0.062645	mRNA LOW	0	0	FUSION	0	0	MISSENSE, INFRAME, TRUNCATING MUTATIONS (PUTATIVE DRIVER)	0	0
PSMC3	ALL	30	0.0696056	AMPLIFICATION	4	0.00928074	DEEP DELETION	0	0	mRNA HIGH	26	0.0603248	mRNA LOW	0	0	FUSION	0	0	MISSENSE, INFRAME, TRUNCATING MUTATIONS (PUTATIVE DRIVER)	0	0
RBX1	ALL	31	0.0719258	AMPLIFICATION	1	0.00232019	DEEP DELETION	0	0	mRNA HIGH	29	0.0672854	mRNA LOW	0	0	FUSION	1	0.00232019	MISSENSE, INFRAME, TRUNCATING MUTATIONS (PUTATIVE DRIVER)	0	0
RELA	ALL	67	0.155452	AMPLIFICATION	16	0.037123	DEEP DELETION	0	0	mRNA HIGH	49	0.113689	mRNA LOW	2	0.00464037	FUSION	0	0	MISSENSE, INFRAME, TRUNCATING MUTATIONS (PUTATIVE DRIVER)	0	0
RPS6	ALL	45	0.104408	AMPLIFICATION	5	0.0116009	DEEP DELETION	0	0	mRNA HIGH	40	0.0928074	mRNA LOW	0	0	FUSION	0	0	MISSENSE, INFRAME, TRUNCATING MUTATIONS (PUTATIVE DRIVER)	0	0
RPS6KB1	ALL	11	0.025522	AMPLIFICATION	1	0.00232019	DEEP DELETION	0	0	mRNA HIGH	10	0.0232019	mRNA LOW	0	0	FUSION	0	0	MISSENSE, INFRAME, TRUNCATING MUTATIONS (PUTATIVE DRIVER)	0	0
RPS6KB2	ALL	60	0.139211	AMPLIFICATION	24	0.0556845	DEEP DELETION	0	0	mRNA HIGH	35	0.0812065	mRNA LOW	0	0	FUSION	1	0.00232019	MISSENSE, INFRAME, TRUNCATING MUTATIONS (PUTATIVE DRIVER)	0	0
RYR1	ALL	9	0.0208817	AMPLIFICATION	4	0.00928074	DEEP DELETION	0	0	mRNA HIGH	5	0.0116009	mRNA LOW	0	0	FUSION	0	0	MISSENSE, INFRAME, TRUNCATING MUTATIONS (PUTATIVE DRIVER)	0	0
SATB1	ALL	7	0.0162413	AMPLIFICATION	0	0	DEEP DELETION	0	0	mRNA HIGH	7	0.0162413	mRNA LOW	0	0	FUSION	0	0	MISSENSE, INFRAME, TRUNCATING MUTATIONS (PUTATIVE DRIVER)	0	0
SCNN1B	ALL	21	0.0487239	AMPLIFICATION	0	0	DEEP DELETION	1	0.00232019	mRNA HIGH	20	0.0464037	mRNA LOW	0	0	FUSION	0	0	MISSENSE, INFRAME, TRUNCATING MUTATIONS (PUTATIVE DRIVER)	0	0
SERPINE1	ALL	32	0.0742459	AMPLIFICATION	13	0.0301624	DEEP DELETION	0	0	mRNA HIGH	19	0.0440835	mRNA LOW	0	0	FUSION	0	0	MISSENSE, INFRAME, TRUNCATING MUTATIONS (PUTATIVE DRIVER)	0	0
SFRP1	ALL	35	0.0812065	AMPLIFICATION	17	0.0394432	DEEP DELETION	7	0.0162413	mRNA HIGH	11	0.025522	mRNA LOW	0	0	FUSION	0	0	MISSENSE, INFRAME, TRUNCATING MUTATIONS (PUTATIVE DRIVER)	0	0
SHC1	ALL	24	0.0556845	AMPLIFICATION	3	0.00696056	DEEP DELETION	0	0	mRNA HIGH	20	0.0464037	mRNA LOW	0	0	FUSION	1	0.00232019	MISSENSE, INFRAME, TRUNCATING MUTATIONS (PUTATIVE DRIVER)	0	0
SLC29A1	ALL	34	0.0788863	AMPLIFICATION	4	0.00928074	DEEP DELETION	0	0	mRNA HIGH	30	0.0696056	mRNA LOW	0	0	FUSION	0	0	MISSENSE, INFRAME, TRUNCATING MUTATIONS (PUTATIVE DRIVER)	0	0
SLC2A1	ALL	24	0.0556845	AMPLIFICATION	1	0.00232019	DEEP DELETION	0	0	mRNA HIGH	23	0.0533643	mRNA LOW	0	0	FUSION	0	0	MISSENSE, INFRAME, TRUNCATING MUTATIONS (PUTATIVE DRIVER)	0	0
SLC8A1	ALL	12	0.0278422	AMPLIFICATION	1	0.00232019	DEEP DELETION	0	0	mRNA HIGH	11	0.025522	mRNA LOW	0	0	FUSION	0	0	MISSENSE, INFRAME, TRUNCATING MUTATIONS (PUTATIVE DRIVER)	0	0
SMAD3	ALL	33	0.0765661	AMPLIFICATION	0	0	DEEP DELETION	2	0.00464037	mRNA HIGH	30	0.0696056	mRNA LOW	1	0.00232019	FUSION	0	0	MISSENSE, INFRAME, TRUNCATING MUTATIONS (PUTATIVE DRIVER)	0	0
SMAD4	ALL	61	0.141531	AMPLIFICATION	0	0	DEEP DELETION	15	0.0348028	mRNA HIGH	13	0.0301624	mRNA LOW	24	0.0556845	FUSION	0	0	MISSENSE, INFRAME, TRUNCATING MUTATIONS (PUTATIVE DRIVER)	9	0.0208817
SNAI3	ALL	10	0.0232019	AMPLIFICATION	1	0.00232019	DEEP DELETION	1	0.00232019	mRNA HIGH	8	0.0185615	mRNA LOW	0	0	FUSION	0	0	MISSENSE, INFRAME, TRUNCATING MUTATIONS (PUTATIVE DRIVER)	0	0
SOD2	ALL	23	0.0533643	AMPLIFICATION	0	0	DEEP DELETION	2	0.00464037	mRNA HIGH	21	0.0487239	mRNA LOW	0	0	FUSION	0	0	MISSENSE, INFRAME, TRUNCATING MUTATIONS (PUTATIVE DRIVER)	0	0
SOD3	ALL	17	0.0394432	AMPLIFICATION	3	0.00696056	DEEP DELETION	3	0.00696056	mRNA HIGH	11	0.025522	mRNA LOW	0	0	FUSION	0	0	MISSENSE, INFRAME, TRUNCATING MUTATIONS (PUTATIVE DRIVER)	0	0
SPRY2	ALL	24	0.0556845	AMPLIFICATION	2	0.00464037	DEEP DELETION	3	0.00696056	mRNA HIGH	19	0.0440835	mRNA LOW	0	0	FUSION	0	0	MISSENSE, INFRAME, TRUNCATING MUTATIONS (PUTATIVE DRIVER)	0	0
STAT3	ALL	19	0.0440835	AMPLIFICATION	1	0.00232019	DEEP DELETION	0	0	mRNA HIGH	17	0.0394432	mRNA LOW	0	0	FUSION	0	0	MISSENSE, INFRAME, TRUNCATING MUTATIONS (PUTATIVE DRIVER)	1	0.00232019
STAT5B	ALL	17	0.0394432	AMPLIFICATION	1	0.00232019	DEEP DELETION	0	0	mRNA HIGH	12	0.0278422	mRNA LOW	4	0.00928074	FUSION	0	0	MISSENSE, INFRAME, TRUNCATING MUTATIONS (PUTATIVE DRIVER)	0	0
STC1	ALL	17	0.0394432	AMPLIFICATION	0	0	DEEP DELETION	10	0.0232019	mRNA HIGH	7	0.0162413	mRNA LOW	0	0	FUSION	0	0	MISSENSE, INFRAME, TRUNCATING MUTATIONS (PUTATIVE DRIVER)	0	0
STC2	ALL	12	0.0278422	AMPLIFICATION	0	0	DEEP DELETION	1	0.00232019	mRNA HIGH	11	0.025522	mRNA LOW	0	0	FUSION	0	0	MISSENSE, INFRAME, TRUNCATING MUTATIONS (PUTATIVE DRIVER)	0	0
TEK	ALL	27	0.062645	AMPLIFICATION	2	0.00464037	DEEP DELETION	10	0.0232019	mRNA HIGH	15	0.0348028	mRNA LOW	0	0	FUSION	0	0	MISSENSE, INFRAME, TRUNCATING MUTATIONS (PUTATIVE DRIVER)	0	0
TF	ALL	40	0.0928074	AMPLIFICATION	16	0.037123	DEEP DELETION	0	0	mRNA HIGH	24	0.0556845	mRNA LOW	0	0	FUSION	0	0	MISSENSE, INFRAME, TRUNCATING MUTATIONS (PUTATIVE DRIVER)	0	0
TFRC	ALL	156	0.361949	AMPLIFICATION	59	0.136891	DEEP DELETION	0	0	mRNA HIGH	95	0.220418	mRNA LOW	0	0	FUSION	2	0.00464037	MISSENSE, INFRAME, TRUNCATING MUTATIONS (PUTATIVE DRIVER)	0	0
TGFA	ALL	24	0.0556845	AMPLIFICATION	2	0.00464037	DEEP DELETION	0	0	mRNA HIGH	21	0.0487239	mRNA LOW	0	0	FUSION	1	0.00232019	MISSENSE, INFRAME, TRUNCATING MUTATIONS (PUTATIVE DRIVER)	0	0
TGFB1	ALL	21	0.0487239	AMPLIFICATION	1	0.00232019	DEEP DELETION	0	0	mRNA HIGH	20	0.0464037	mRNA LOW	0	0	FUSION	0	0	MISSENSE, INFRAME, TRUNCATING MUTATIONS (PUTATIVE DRIVER)	0	0
TGFB2	ALL	21	0.0487239	AMPLIFICATION	0	0	DEEP DELETION	0	0	mRNA HIGH	21	0.0487239	mRNA LOW	0	0	FUSION	0	0	MISSENSE, INFRAME, TRUNCATING MUTATIONS (PUTATIVE DRIVER)	0	0
TGFB3	ALL	27	0.062645	AMPLIFICATION	2	0.00464037	DEEP DELETION	0	0	mRNA HIGH	25	0.0580046	mRNA LOW	0	0	FUSION	0	0	MISSENSE, INFRAME, TRUNCATING MUTATIONS (PUTATIVE DRIVER)	0	0
TGFBR1	ALL	24	0.0556845	AMPLIFICATION	2	0.00464037	DEEP DELETION	0	0	mRNA HIGH	22	0.0510441	mRNA LOW	0	0	FUSION	0	0	MISSENSE, INFRAME, TRUNCATING MUTATIONS (PUTATIVE DRIVER)	0	0
TH	ALL	17	0.0394432	AMPLIFICATION	0	0	DEEP DELETION	1	0.00232019	mRNA HIGH	16	0.037123	mRNA LOW	0	0	FUSION	0	0	MISSENSE, INFRAME, TRUNCATING MUTATIONS (PUTATIVE DRIVER)	0	0
THBS1	ALL	23	0.0533643	AMPLIFICATION	0	0	DEEP DELETION	0	0	mRNA HIGH	22	0.0510441	mRNA LOW	0	0	FUSION	1	0.00232019	MISSENSE, INFRAME, TRUNCATING MUTATIONS (PUTATIVE DRIVER)	0	0
TIMP1	ALL	28	0.0649652	AMPLIFICATION	2	0.00464037	DEEP DELETION	9	0.0208817	mRNA HIGH	17	0.0394432	mRNA LOW	0	0	FUSION	0	0	MISSENSE, INFRAME, TRUNCATING MUTATIONS (PUTATIVE DRIVER)	0	0
TLR4	ALL	18	0.0417633	AMPLIFICATION	3	0.00696056	DEEP DELETION	0	0	mRNA HIGH	15	0.0348028	mRNA LOW	0	0	FUSION	0	0	MISSENSE, INFRAME, TRUNCATING MUTATIONS (PUTATIVE DRIVER)	0	0
TNC	ALL	33	0.0765661	AMPLIFICATION	3	0.00696056	DEEP DELETION	0	0	mRNA HIGH	28	0.0649652	mRNA LOW	0	0	FUSION	2	0.00464037	MISSENSE, INFRAME, TRUNCATING MUTATIONS (PUTATIVE DRIVER)	0	0
TNF	ALL	15	0.0348028	AMPLIFICATION	4	0.00928074	DEEP DELETION	0	0	mRNA HIGH	11	0.025522	mRNA LOW	0	0	FUSION	0	0	MISSENSE, INFRAME, TRUNCATING MUTATIONS (PUTATIVE DRIVER)	0	0
TP53	ALL	338	0.784223	AMPLIFICATION	0	0	DEEP DELETION	3	0.00696056	mRNA HIGH	16	0.037123	mRNA LOW	0	0	FUSION	0	0	MISSENSE, INFRAME, TRUNCATING MUTATIONS (PUTATIVE DRIVER)	319	0.740139
TSC2	ALL	14	0.0324826	AMPLIFICATION	1	0.00232019	DEEP DELETION	0	0	mRNA HIGH	13	0.0301624	mRNA LOW	0	0	FUSION	0	0	MISSENSE, INFRAME, TRUNCATING MUTATIONS (PUTATIVE DRIVER)	0	0
UBE2B	ALL	28	0.0649652	AMPLIFICATION	1	0.00232019	DEEP DELETION	1	0.00232019	mRNA HIGH	20	0.0464037	mRNA LOW	6	0.0139211	FUSION	0	0	MISSENSE, INFRAME, TRUNCATING MUTATIONS (PUTATIVE DRIVER)	0	0
UCP2	ALL	32	0.0742459	AMPLIFICATION	17	0.0394432	DEEP DELETION	1	0.00232019	mRNA HIGH	14	0.0324826	mRNA LOW	0	0	FUSION	0	0	MISSENSE, INFRAME, TRUNCATING MUTATIONS (PUTATIVE DRIVER)	0	0
USF1	ALL	23	0.0533643	AMPLIFICATION	3	0.00696056	DEEP DELETION	0	0	mRNA HIGH	20	0.0464037	mRNA LOW	0	0	FUSION	0	0	MISSENSE, INFRAME, TRUNCATING MUTATIONS (PUTATIVE DRIVER)	0	0
VCAM1	ALL	9	0.0208817	AMPLIFICATION	0	0	DEEP DELETION	2	0.00464037	mRNA HIGH	7	0.0162413	mRNA LOW	0	0	FUSION	0	0	MISSENSE, INFRAME, TRUNCATING MUTATIONS (PUTATIVE DRIVER)	0	0
VEGFA	ALL	31	0.0719258	AMPLIFICATION	4	0.00928074	DEEP DELETION	0	0	mRNA HIGH	27	0.062645	mRNA LOW	0	0	FUSION	0	0	MISSENSE, INFRAME, TRUNCATING MUTATIONS (PUTATIVE DRIVER)	0	0
VEGFC	ALL	29	0.0672854	AMPLIFICATION	0	0	DEEP DELETION	10	0.0232019	mRNA HIGH	19	0.0440835	mRNA LOW	0	0	FUSION	0	0	MISSENSE, INFRAME, TRUNCATING MUTATIONS (PUTATIVE DRIVER)	0	0
VHL	ALL	13	0.0301624	AMPLIFICATION	0	0	DEEP DELETION	0	0	mRNA HIGH	5	0.0116009	mRNA LOW	8	0.0185615	FUSION	0	0	MISSENSE, INFRAME, TRUNCATING MUTATIONS (PUTATIVE DRIVER)	0	0
VLDLR	ALL	36	0.0835267	AMPLIFICATION	14	0.0324826	DEEP DELETION	6	0.0139211	mRNA HIGH	16	0.037123	mRNA LOW	0	0	FUSION	0	0	MISSENSE, INFRAME, TRUNCATING MUTATIONS (PUTATIVE DRIVER)	0	0

## Sheet: ST_8
Supplementary Table 8. Frequency of genetic alterations in the hypoxia-related genes of 352 individuals with kidney renal clear cell carcinoma from the TCGA Pan-Cancer Atlas project (TCGA-KIRC-PanCancer).
GENE	TYPE	TOTAL	FREQUENCY	TYPE	TOTAL	FREQUENCY	TYPE	TOTAL	FREQUENCY	TYPE	TOTAL	FREQUENCY	TYPE	TOTAL	FREQUENCY	TYPE	TOTAL	FREQUENCY	TYPE	TOTAL	FREQUENCY
ACTN4	ALL	23	0.0653409	AMPLIFICATION	0	0	DEEP DELETION	0	0	mRNA HIGH	17	0.0482955	mRNA LOW	6	0.0170455	FUSION	0	0	MISSENSE, INFRAME, TRUNCATING MUTATIONS (PUTATIVE DRIVER)	0	0
ADA	ALL	23	0.0653409	AMPLIFICATION	0	0	DEEP DELETION	0	0	mRNA HIGH	23	0.0653409	mRNA LOW	0	0	FUSION	0	0	MISSENSE, INFRAME, TRUNCATING MUTATIONS (PUTATIVE DRIVER)	0	0
ADAM8	ALL	9	0.0255682	AMPLIFICATION	0	0	DEEP DELETION	0	0	mRNA HIGH	9	0.0255682	mRNA LOW	0	0	FUSION	0	0	MISSENSE, INFRAME, TRUNCATING MUTATIONS (PUTATIVE DRIVER)	0	0
ADM	ALL	15	0.0426136	AMPLIFICATION	0	0	DEEP DELETION	0	0	mRNA HIGH	15	0.0426136	mRNA LOW	0	0	FUSION	0	0	MISSENSE, INFRAME, TRUNCATING MUTATIONS (PUTATIVE DRIVER)	0	0
ADORA1	ALL	17	0.0482955	AMPLIFICATION	0	0	DEEP DELETION	0	0	mRNA HIGH	17	0.0482955	mRNA LOW	0	0	FUSION	0	0	MISSENSE, INFRAME, TRUNCATING MUTATIONS (PUTATIVE DRIVER)	0	0
ADRA1B	ALL	46	0.130682	AMPLIFICATION	23	0.0653409	DEEP DELETION	0	0	mRNA HIGH	23	0.0653409	mRNA LOW	0	0	FUSION	0	0	MISSENSE, INFRAME, TRUNCATING MUTATIONS (PUTATIVE DRIVER)	0	0
AKT1	ALL	37	0.105114	AMPLIFICATION	0	0	DEEP DELETION	0	0	mRNA HIGH	9	0.0255682	mRNA LOW	27	0.0767045	FUSION	0	0	MISSENSE, INFRAME, TRUNCATING MUTATIONS (PUTATIVE DRIVER)	1	0.00284091
AKT2	ALL	20	0.0568182	AMPLIFICATION	0	0	DEEP DELETION	0	0	mRNA HIGH	16	0.0454545	mRNA LOW	4	0.0113636	FUSION	0	0	MISSENSE, INFRAME, TRUNCATING MUTATIONS (PUTATIVE DRIVER)	0	0
AKT3	ALL	13	0.0369318	AMPLIFICATION	1	0.00284091	DEEP DELETION	0	0	mRNA HIGH	10	0.0284091	mRNA LOW	2	0.00568182	FUSION	0	0	MISSENSE, INFRAME, TRUNCATING MUTATIONS (PUTATIVE DRIVER)	0	0
ALAS2	ALL	9	0.0255682	AMPLIFICATION	0	0	DEEP DELETION	0	0	mRNA HIGH	9	0.0255682	mRNA LOW	0	0	FUSION	0	0	MISSENSE, INFRAME, TRUNCATING MUTATIONS (PUTATIVE DRIVER)	0	0
ALDOA	ALL	34	0.0965909	AMPLIFICATION	0	0	DEEP DELETION	0	0	mRNA HIGH	31	0.0880682	mRNA LOW	3	0.00852273	FUSION	0	0	MISSENSE, INFRAME, TRUNCATING MUTATIONS (PUTATIVE DRIVER)	0	0
ALDOB	ALL	5	0.0142045	AMPLIFICATION	0	0	DEEP DELETION	0	0	mRNA HIGH	5	0.0142045	mRNA LOW	0	0	FUSION	0	0	MISSENSE, INFRAME, TRUNCATING MUTATIONS (PUTATIVE DRIVER)	0	0
ALDOC	ALL	17	0.0482955	AMPLIFICATION	1	0.00284091	DEEP DELETION	0	0	mRNA HIGH	16	0.0454545	mRNA LOW	0	0	FUSION	0	0	MISSENSE, INFRAME, TRUNCATING MUTATIONS (PUTATIVE DRIVER)	0	0
ANG	ALL	1	0.00284091	AMPLIFICATION	0	0	DEEP DELETION	0	0	mRNA HIGH	1	0.00284091	mRNA LOW	0	0	FUSION	0	0	MISSENSE, INFRAME, TRUNCATING MUTATIONS (PUTATIVE DRIVER)	0	0
ANGPT1	ALL	10	0.0284091	AMPLIFICATION	2	0.00568182	DEEP DELETION	0	0	mRNA HIGH	8	0.0227273	mRNA LOW	0	0	FUSION	0	0	MISSENSE, INFRAME, TRUNCATING MUTATIONS (PUTATIVE DRIVER)	0	0
ANGPT2	ALL	24	0.0681818	AMPLIFICATION	0	0	DEEP DELETION	3	0.00852273	mRNA HIGH	21	0.0596591	mRNA LOW	0	0	FUSION	0	0	MISSENSE, INFRAME, TRUNCATING MUTATIONS (PUTATIVE DRIVER)	0	0
ANGPT4	ALL	14	0.0397727	AMPLIFICATION	0	0	DEEP DELETION	0	0	mRNA HIGH	14	0.0397727	mRNA LOW	0	0	FUSION	0	0	MISSENSE, INFRAME, TRUNCATING MUTATIONS (PUTATIVE DRIVER)	0	0
ANGPTL4	ALL	18	0.0511364	AMPLIFICATION	0	0	DEEP DELETION	1	0.00284091	mRNA HIGH	17	0.0482955	mRNA LOW	0	0	FUSION	0	0	MISSENSE, INFRAME, TRUNCATING MUTATIONS (PUTATIVE DRIVER)	0	0
AQP1	ALL	18	0.0511364	AMPLIFICATION	0	0	DEEP DELETION	0	0	mRNA HIGH	18	0.0511364	mRNA LOW	0	0	FUSION	0	0	MISSENSE, INFRAME, TRUNCATING MUTATIONS (PUTATIVE DRIVER)	0	0
ARG2	ALL	11	0.03125	AMPLIFICATION	0	0	DEEP DELETION	0	0	mRNA HIGH	10	0.0284091	mRNA LOW	0	0	FUSION	1	0.00284091	MISSENSE, INFRAME, TRUNCATING MUTATIONS (PUTATIVE DRIVER)	0	0
ARNT	ALL	29	0.0823864	AMPLIFICATION	1	0.00284091	DEEP DELETION	0	0	mRNA HIGH	16	0.0454545	mRNA LOW	12	0.0340909	FUSION	0	0	MISSENSE, INFRAME, TRUNCATING MUTATIONS (PUTATIVE DRIVER)	0	0
ARNT2	ALL	12	0.0340909	AMPLIFICATION	0	0	DEEP DELETION	0	0	mRNA HIGH	12	0.0340909	mRNA LOW	0	0	FUSION	0	0	MISSENSE, INFRAME, TRUNCATING MUTATIONS (PUTATIVE DRIVER)	0	0
ASCL2	ALL	14	0.0397727	AMPLIFICATION	0	0	DEEP DELETION	0	0	mRNA HIGH	14	0.0397727	mRNA LOW	0	0	FUSION	0	0	MISSENSE, INFRAME, TRUNCATING MUTATIONS (PUTATIVE DRIVER)	0	0
ATP1A1	ALL	14	0.0397727	AMPLIFICATION	0	0	DEEP DELETION	0	0	mRNA HIGH	14	0.0397727	mRNA LOW	0	0	FUSION	0	0	MISSENSE, INFRAME, TRUNCATING MUTATIONS (PUTATIVE DRIVER)	0	0
ATP1A2	ALL	15	0.0426136	AMPLIFICATION	1	0.00284091	DEEP DELETION	0	0	mRNA HIGH	14	0.0397727	mRNA LOW	0	0	FUSION	0	0	MISSENSE, INFRAME, TRUNCATING MUTATIONS (PUTATIVE DRIVER)	0	0
ATP1B1	ALL	16	0.0454545	AMPLIFICATION	1	0.00284091	DEEP DELETION	0	0	mRNA HIGH	15	0.0426136	mRNA LOW	0	0	FUSION	0	0	MISSENSE, INFRAME, TRUNCATING MUTATIONS (PUTATIVE DRIVER)	0	0
BACH1	ALL	16	0.0454545	AMPLIFICATION	0	0	DEEP DELETION	1	0.00284091	mRNA HIGH	14	0.0397727	mRNA LOW	0	0	FUSION	1	0.00284091	MISSENSE, INFRAME, TRUNCATING MUTATIONS (PUTATIVE DRIVER)	0	0
BAD	ALL	17	0.0482955	AMPLIFICATION	0	0	DEEP DELETION	0	0	mRNA HIGH	17	0.0482955	mRNA LOW	0	0	FUSION	0	0	MISSENSE, INFRAME, TRUNCATING MUTATIONS (PUTATIVE DRIVER)	0	0
BBC3	ALL	23	0.0653409	AMPLIFICATION	0	0	DEEP DELETION	1	0.00284091	mRNA HIGH	22	0.0625	mRNA LOW	0	0	FUSION	0	0	MISSENSE, INFRAME, TRUNCATING MUTATIONS (PUTATIVE DRIVER)	0	0
BCL2	ALL	17	0.0482955	AMPLIFICATION	1	0.00284091	DEEP DELETION	0	0	mRNA HIGH	11	0.03125	mRNA LOW	5	0.0142045	FUSION	0	0	MISSENSE, INFRAME, TRUNCATING MUTATIONS (PUTATIVE DRIVER)	0	0
BNIP3	ALL	10	0.0284091	AMPLIFICATION	0	0	DEEP DELETION	0	0	mRNA HIGH	9	0.0255682	mRNA LOW	1	0.00284091	FUSION	0	0	MISSENSE, INFRAME, TRUNCATING MUTATIONS (PUTATIVE DRIVER)	0	0
CAMK2A	ALL	29	0.0823864	AMPLIFICATION	22	0.0625	DEEP DELETION	0	0	mRNA HIGH	6	0.0170455	mRNA LOW	0	0	FUSION	1	0.00284091	MISSENSE, INFRAME, TRUNCATING MUTATIONS (PUTATIVE DRIVER)	0	0
CAMK2B	ALL	11	0.03125	AMPLIFICATION	0	0	DEEP DELETION	0	0	mRNA HIGH	11	0.03125	mRNA LOW	0	0	FUSION	0	0	MISSENSE, INFRAME, TRUNCATING MUTATIONS (PUTATIVE DRIVER)	0	0
CAMK2D	ALL	10	0.0284091	AMPLIFICATION	0	0	DEEP DELETION	0	0	mRNA HIGH	10	0.0284091	mRNA LOW	0	0	FUSION	0	0	MISSENSE, INFRAME, TRUNCATING MUTATIONS (PUTATIVE DRIVER)	0	0
CAMK2G	ALL	28	0.0795455	AMPLIFICATION	0	0	DEEP DELETION	0	0	mRNA HIGH	10	0.0284091	mRNA LOW	18	0.0511364	FUSION	0	0	MISSENSE, INFRAME, TRUNCATING MUTATIONS (PUTATIVE DRIVER)	0	0
CASR	ALL	12	0.0340909	AMPLIFICATION	1	0.00284091	DEEP DELETION	0	0	mRNA HIGH	11	0.03125	mRNA LOW	0	0	FUSION	0	0	MISSENSE, INFRAME, TRUNCATING MUTATIONS (PUTATIVE DRIVER)	0	0
CAV1	ALL	24	0.0681818	AMPLIFICATION	2	0.00568182	DEEP DELETION	0	0	mRNA HIGH	22	0.0625	mRNA LOW	0	0	FUSION	0	0	MISSENSE, INFRAME, TRUNCATING MUTATIONS (PUTATIVE DRIVER)	0	0
CCL2	ALL	15	0.0426136	AMPLIFICATION	1	0.00284091	DEEP DELETION	0	0	mRNA HIGH	14	0.0397727	mRNA LOW	0	0	FUSION	0	0	MISSENSE, INFRAME, TRUNCATING MUTATIONS (PUTATIVE DRIVER)	0	0
CD24	ALL	0	0	AMPLIFICATION	0	0	DEEP DELETION	0	0	mRNA HIGH	0	0	mRNA LOW	0	0	FUSION	0	0	MISSENSE, INFRAME, TRUNCATING MUTATIONS (PUTATIVE DRIVER)	0	0
CDH1	ALL	16	0.0454545	AMPLIFICATION	0	0	DEEP DELETION	0	0	mRNA HIGH	16	0.0454545	mRNA LOW	0	0	FUSION	0	0	MISSENSE, INFRAME, TRUNCATING MUTATIONS (PUTATIVE DRIVER)	0	0
CDKN1A	ALL	11	0.03125	AMPLIFICATION	0	0	DEEP DELETION	0	0	mRNA HIGH	11	0.03125	mRNA LOW	0	0	FUSION	0	0	MISSENSE, INFRAME, TRUNCATING MUTATIONS (PUTATIVE DRIVER)	0	0
CDKN1B	ALL	14	0.0397727	AMPLIFICATION	0	0	DEEP DELETION	0	0	mRNA HIGH	9	0.0255682	mRNA LOW	5	0.0142045	FUSION	0	0	MISSENSE, INFRAME, TRUNCATING MUTATIONS (PUTATIVE DRIVER)	0	0
CHRNA7	ALL	19	0.0539773	AMPLIFICATION	1	0.00284091	DEEP DELETION	0	0	mRNA HIGH	18	0.0511364	mRNA LOW	0	0	FUSION	0	0	MISSENSE, INFRAME, TRUNCATING MUTATIONS (PUTATIVE DRIVER)	0	0
CHRNB2	ALL	7	0.0198864	AMPLIFICATION	1	0.00284091	DEEP DELETION	0	0	mRNA HIGH	6	0.0170455	mRNA LOW	0	0	FUSION	0	0	MISSENSE, INFRAME, TRUNCATING MUTATIONS (PUTATIVE DRIVER)	0	0
CIAO3	ALL	21	0.0596591	AMPLIFICATION	0	0	DEEP DELETION	0	0	mRNA HIGH	19	0.0539773	mRNA LOW	2	0.00568182	FUSION	0	0	MISSENSE, INFRAME, TRUNCATING MUTATIONS (PUTATIVE DRIVER)	0	0
CITED2	ALL	17	0.0482955	AMPLIFICATION	0	0	DEEP DELETION	1	0.00284091	mRNA HIGH	16	0.0454545	mRNA LOW	0	0	FUSION	0	0	MISSENSE, INFRAME, TRUNCATING MUTATIONS (PUTATIVE DRIVER)	0	0
CLDN3	ALL	19	0.0539773	AMPLIFICATION	2	0.00568182	DEEP DELETION	0	0	mRNA HIGH	17	0.0482955	mRNA LOW	0	0	FUSION	0	0	MISSENSE, INFRAME, TRUNCATING MUTATIONS (PUTATIVE DRIVER)	0	0
COPS5	ALL	36	0.102273	AMPLIFICATION	3	0.00852273	DEEP DELETION	0	0	mRNA HIGH	25	0.0710227	mRNA LOW	8	0.0227273	FUSION	0	0	MISSENSE, INFRAME, TRUNCATING MUTATIONS (PUTATIVE DRIVER)	0	0
CREBBP	ALL	18	0.0511364	AMPLIFICATION	0	0	DEEP DELETION	0	0	mRNA HIGH	12	0.0340909	mRNA LOW	6	0.0170455	FUSION	0	0	MISSENSE, INFRAME, TRUNCATING MUTATIONS (PUTATIVE DRIVER)	0	0
CUL2	ALL	21	0.0596591	AMPLIFICATION	0	0	DEEP DELETION	0	0	mRNA HIGH	16	0.0454545	mRNA LOW	5	0.0142045	FUSION	0	0	MISSENSE, INFRAME, TRUNCATING MUTATIONS (PUTATIVE DRIVER)	0	0
CXCR4	ALL	18	0.0511364	AMPLIFICATION	0	0	DEEP DELETION	0	0	mRNA HIGH	18	0.0511364	mRNA LOW	0	0	FUSION	0	0	MISSENSE, INFRAME, TRUNCATING MUTATIONS (PUTATIVE DRIVER)	0	0
CYBB	ALL	12	0.0340909	AMPLIFICATION	2	0.00568182	DEEP DELETION	0	0	mRNA HIGH	10	0.0284091	mRNA LOW	0	0	FUSION	0	0	MISSENSE, INFRAME, TRUNCATING MUTATIONS (PUTATIVE DRIVER)	0	0
CYP1A1	ALL	9	0.0255682	AMPLIFICATION	0	0	DEEP DELETION	0	0	mRNA HIGH	9	0.0255682	mRNA LOW	0	0	FUSION	0	0	MISSENSE, INFRAME, TRUNCATING MUTATIONS (PUTATIVE DRIVER)	0	0
DDIT4	ALL	18	0.0511364	AMPLIFICATION	0	0	DEEP DELETION	0	0	mRNA HIGH	18	0.0511364	mRNA LOW	0	0	FUSION	0	0	MISSENSE, INFRAME, TRUNCATING MUTATIONS (PUTATIVE DRIVER)	0	0
DPP4	ALL	19	0.0539773	AMPLIFICATION	0	0	DEEP DELETION	0	0	mRNA HIGH	19	0.0539773	mRNA LOW	0	0	FUSION	0	0	MISSENSE, INFRAME, TRUNCATING MUTATIONS (PUTATIVE DRIVER)	0	0
E2F1	ALL	28	0.0795455	AMPLIFICATION	0	0	DEEP DELETION	0	0	mRNA HIGH	28	0.0795455	mRNA LOW	0	0	FUSION	0	0	MISSENSE, INFRAME, TRUNCATING MUTATIONS (PUTATIVE DRIVER)	0	0
EDN1	ALL	11	0.03125	AMPLIFICATION	0	0	DEEP DELETION	0	0	mRNA HIGH	11	0.03125	mRNA LOW	0	0	FUSION	0	0	MISSENSE, INFRAME, TRUNCATING MUTATIONS (PUTATIVE DRIVER)	0	0
EDNRA	ALL	21	0.0596591	AMPLIFICATION	0	0	DEEP DELETION	0	0	mRNA HIGH	21	0.0596591	mRNA LOW	0	0	FUSION	0	0	MISSENSE, INFRAME, TRUNCATING MUTATIONS (PUTATIVE DRIVER)	0	0
EDNRB	ALL	15	0.0426136	AMPLIFICATION	0	0	DEEP DELETION	0	0	mRNA HIGH	14	0.0397727	mRNA LOW	0	0	FUSION	1	0.00284091	MISSENSE, INFRAME, TRUNCATING MUTATIONS (PUTATIVE DRIVER)	0	0
EGF	ALL	7	0.0198864	AMPLIFICATION	0	0	DEEP DELETION	0	0	mRNA HIGH	7	0.0198864	mRNA LOW	0	0	FUSION	0	0	MISSENSE, INFRAME, TRUNCATING MUTATIONS (PUTATIVE DRIVER)	0	0
EGFR	ALL	15	0.0426136	AMPLIFICATION	0	0	DEEP DELETION	0	0	mRNA HIGH	15	0.0426136	mRNA LOW	0	0	FUSION	0	0	MISSENSE, INFRAME, TRUNCATING MUTATIONS (PUTATIVE DRIVER)	0	0
EGLN1	ALL	14	0.0397727	AMPLIFICATION	1	0.00284091	DEEP DELETION	0	0	mRNA HIGH	11	0.03125	mRNA LOW	2	0.00568182	FUSION	0	0	MISSENSE, INFRAME, TRUNCATING MUTATIONS (PUTATIVE DRIVER)	0	0
EGLN2	ALL	7	0.0198864	AMPLIFICATION	0	0	DEEP DELETION	0	0	mRNA HIGH	7	0.0198864	mRNA LOW	0	0	FUSION	0	0	MISSENSE, INFRAME, TRUNCATING MUTATIONS (PUTATIVE DRIVER)	0	0
EGLN3	ALL	15	0.0426136	AMPLIFICATION	0	0	DEEP DELETION	0	0	mRNA HIGH	8	0.0227273	mRNA LOW	4	0.0113636	FUSION	3	0.00852273	MISSENSE, INFRAME, TRUNCATING MUTATIONS (PUTATIVE DRIVER)	0	0
EIF4E	ALL	12	0.0340909	AMPLIFICATION	0	0	DEEP DELETION	0	0	mRNA HIGH	12	0.0340909	mRNA LOW	0	0	FUSION	0	0	MISSENSE, INFRAME, TRUNCATING MUTATIONS (PUTATIVE DRIVER)	0	0
EIF4E1B	ALL	29	0.0823864	AMPLIFICATION	26	0.0738636	DEEP DELETION	0	0	mRNA HIGH	3	0.00852273	mRNA LOW	0	0	FUSION	0	0	MISSENSE, INFRAME, TRUNCATING MUTATIONS (PUTATIVE DRIVER)	0	0
EIF4E2	ALL	39	0.110795	AMPLIFICATION	2	0.00568182	DEEP DELETION	1	0.00284091	mRNA HIGH	23	0.0653409	mRNA LOW	13	0.0369318	FUSION	0	0	MISSENSE, INFRAME, TRUNCATING MUTATIONS (PUTATIVE DRIVER)	0	0
EIF4EBP1	ALL	10	0.0284091	AMPLIFICATION	1	0.00284091	DEEP DELETION	3	0.00852273	mRNA HIGH	6	0.0170455	mRNA LOW	0	0	FUSION	0	0	MISSENSE, INFRAME, TRUNCATING MUTATIONS (PUTATIVE DRIVER)	0	0
ELF2	ALL	19	0.0539773	AMPLIFICATION	0	0	DEEP DELETION	0	0	mRNA HIGH	10	0.0284091	mRNA LOW	9	0.0255682	FUSION	0	0	MISSENSE, INFRAME, TRUNCATING MUTATIONS (PUTATIVE DRIVER)	0	0
ELOB	ALL	4	0.0113636	AMPLIFICATION	0	0	DEEP DELETION	0	0	mRNA HIGH	4	0.0113636	mRNA LOW	0	0	FUSION	0	0	MISSENSE, INFRAME, TRUNCATING MUTATIONS (PUTATIVE DRIVER)	0	0
ELOC	ALL	32	0.0909091	AMPLIFICATION	3	0.00852273	DEEP DELETION	0	0	mRNA HIGH	27	0.0767045	mRNA LOW	0	0	FUSION	0	0	MISSENSE, INFRAME, TRUNCATING MUTATIONS (PUTATIVE DRIVER)	2	0.00568182
ENG	ALL	7	0.0198864	AMPLIFICATION	0	0	DEEP DELETION	0	0	mRNA HIGH	7	0.0198864	mRNA LOW	0	0	FUSION	0	0	MISSENSE, INFRAME, TRUNCATING MUTATIONS (PUTATIVE DRIVER)	0	0
ENO1	ALL	35	0.0994318	AMPLIFICATION	0	0	DEEP DELETION	0	0	mRNA HIGH	14	0.0397727	mRNA LOW	21	0.0596591	FUSION	0	0	MISSENSE, INFRAME, TRUNCATING MUTATIONS (PUTATIVE DRIVER)	0	0
ENO2	ALL	22	0.0625	AMPLIFICATION	0	0	DEEP DELETION	0	0	mRNA HIGH	22	0.0625	mRNA LOW	0	0	FUSION	0	0	MISSENSE, INFRAME, TRUNCATING MUTATIONS (PUTATIVE DRIVER)	0	0
ENO3	ALL	4	0.0113636	AMPLIFICATION	0	0	DEEP DELETION	0	0	mRNA HIGH	4	0.0113636	mRNA LOW	0	0	FUSION	0	0	MISSENSE, INFRAME, TRUNCATING MUTATIONS (PUTATIVE DRIVER)	0	0
ENO4	ALL	0	0	AMPLIFICATION	0	0	DEEP DELETION	0	0	mRNA HIGH	0	0	mRNA LOW	0	0	FUSION	0	0	MISSENSE, INFRAME, TRUNCATING MUTATIONS (PUTATIVE DRIVER)	0	0
EP300	ALL	23	0.0653409	AMPLIFICATION	0	0	DEEP DELETION	0	0	mRNA HIGH	12	0.0340909	mRNA LOW	8	0.0227273	FUSION	1	0.00284091	MISSENSE, INFRAME, TRUNCATING MUTATIONS (PUTATIVE DRIVER)	2	0.00568182
EPAS1	ALL	17	0.0482955	AMPLIFICATION	0	0	DEEP DELETION	1	0.00284091	mRNA HIGH	16	0.0454545	mRNA LOW	0	0	FUSION	0	0	MISSENSE, INFRAME, TRUNCATING MUTATIONS (PUTATIVE DRIVER)	0	0
EPO	ALL	15	0.0426136	AMPLIFICATION	3	0.00852273	DEEP DELETION	0	0	mRNA HIGH	12	0.0340909	mRNA LOW	0	0	FUSION	0	0	MISSENSE, INFRAME, TRUNCATING MUTATIONS (PUTATIVE DRIVER)	0	0
ERBB2	ALL	20	0.0568182	AMPLIFICATION	1	0.00284091	DEEP DELETION	0	0	mRNA HIGH	17	0.0482955	mRNA LOW	1	0.00284091	FUSION	0	0	MISSENSE, INFRAME, TRUNCATING MUTATIONS (PUTATIVE DRIVER)	1	0.00284091
ETS1	ALL	17	0.0482955	AMPLIFICATION	0	0	DEEP DELETION	0	0	mRNA HIGH	17	0.0482955	mRNA LOW	0	0	FUSION	0	0	MISSENSE, INFRAME, TRUNCATING MUTATIONS (PUTATIVE DRIVER)	0	0
FLT1	ALL	10	0.0284091	AMPLIFICATION	0	0	DEEP DELETION	1	0.00284091	mRNA HIGH	9	0.0255682	mRNA LOW	0	0	FUSION	0	0	MISSENSE, INFRAME, TRUNCATING MUTATIONS (PUTATIVE DRIVER)	0	0
GAPDH	ALL	37	0.105114	AMPLIFICATION	0	0	DEEP DELETION	0	0	mRNA HIGH	36	0.102273	mRNA LOW	1	0.00284091	FUSION	0	0	MISSENSE, INFRAME, TRUNCATING MUTATIONS (PUTATIVE DRIVER)	0	0
GATA6	ALL	17	0.0482955	AMPLIFICATION	1	0.00284091	DEEP DELETION	0	0	mRNA HIGH	16	0.0454545	mRNA LOW	0	0	FUSION	0	0	MISSENSE, INFRAME, TRUNCATING MUTATIONS (PUTATIVE DRIVER)	0	0
HBB	ALL	8	0.0227273	AMPLIFICATION	0	0	DEEP DELETION	0	0	mRNA HIGH	8	0.0227273	mRNA LOW	0	0	FUSION	0	0	MISSENSE, INFRAME, TRUNCATING MUTATIONS (PUTATIVE DRIVER)	0	0
HBG2	ALL	5	0.0142045	AMPLIFICATION	0	0	DEEP DELETION	0	0	mRNA HIGH	5	0.0142045	mRNA LOW	0	0	FUSION	0	0	MISSENSE, INFRAME, TRUNCATING MUTATIONS (PUTATIVE DRIVER)	0	0
HIF1A	ALL	13	0.0369318	AMPLIFICATION	0	0	DEEP DELETION	0	0	mRNA HIGH	13	0.0369318	mRNA LOW	0	0	FUSION	0	0	MISSENSE, INFRAME, TRUNCATING MUTATIONS (PUTATIVE DRIVER)	0	0
HIF3A	ALL	12	0.0340909	AMPLIFICATION	0	0	DEEP DELETION	1	0.00284091	mRNA HIGH	11	0.03125	mRNA LOW	0	0	FUSION	0	0	MISSENSE, INFRAME, TRUNCATING MUTATIONS (PUTATIVE DRIVER)	0	0
HK1	ALL	16	0.0454545	AMPLIFICATION	0	0	DEEP DELETION	0	0	mRNA HIGH	9	0.0255682	mRNA LOW	7	0.0198864	FUSION	0	0	MISSENSE, INFRAME, TRUNCATING MUTATIONS (PUTATIVE DRIVER)	0	0
HK2	ALL	27	0.0767045	AMPLIFICATION	0	0	DEEP DELETION	0	0	mRNA HIGH	27	0.0767045	mRNA LOW	0	0	FUSION	0	0	MISSENSE, INFRAME, TRUNCATING MUTATIONS (PUTATIVE DRIVER)	0	0
HK3	ALL	38	0.107955	AMPLIFICATION	27	0.0767045	DEEP DELETION	0	0	mRNA HIGH	11	0.03125	mRNA LOW	0	0	FUSION	0	0	MISSENSE, INFRAME, TRUNCATING MUTATIONS (PUTATIVE DRIVER)	0	0
HKDC1	ALL	17	0.0482955	AMPLIFICATION	0	0	DEEP DELETION	0	0	mRNA HIGH	17	0.0482955	mRNA LOW	0	0	FUSION	0	0	MISSENSE, INFRAME, TRUNCATING MUTATIONS (PUTATIVE DRIVER)	0	0
HMBS	ALL	12	0.0340909	AMPLIFICATION	0	0	DEEP DELETION	0	0	mRNA HIGH	12	0.0340909	mRNA LOW	0	0	FUSION	0	0	MISSENSE, INFRAME, TRUNCATING MUTATIONS (PUTATIVE DRIVER)	0	0
HMOX1	ALL	16	0.0454545	AMPLIFICATION	0	0	DEEP DELETION	0	0	mRNA HIGH	16	0.0454545	mRNA LOW	0	0	FUSION	0	0	MISSENSE, INFRAME, TRUNCATING MUTATIONS (PUTATIVE DRIVER)	0	0
HMOX2	ALL	28	0.0795455	AMPLIFICATION	0	0	DEEP DELETION	0	0	mRNA HIGH	26	0.0738636	mRNA LOW	2	0.00568182	FUSION	0	0	MISSENSE, INFRAME, TRUNCATING MUTATIONS (PUTATIVE DRIVER)	0	0
HSP90B1	ALL	27	0.0767045	AMPLIFICATION	0	0	DEEP DELETION	0	0	mRNA HIGH	26	0.0738636	mRNA LOW	1	0.00284091	FUSION	0	0	MISSENSE, INFRAME, TRUNCATING MUTATIONS (PUTATIVE DRIVER)	0	0
HYOU1	ALL	21	0.0596591	AMPLIFICATION	0	0	DEEP DELETION	0	0	mRNA HIGH	21	0.0596591	mRNA LOW	0	0	FUSION	0	0	MISSENSE, INFRAME, TRUNCATING MUTATIONS (PUTATIVE DRIVER)	0	0
IFNG	ALL	19	0.0539773	AMPLIFICATION	0	0	DEEP DELETION	0	0	mRNA HIGH	19	0.0539773	mRNA LOW	0	0	FUSION	0	0	MISSENSE, INFRAME, TRUNCATING MUTATIONS (PUTATIVE DRIVER)	0	0
IFNGR1	ALL	16	0.0454545	AMPLIFICATION	0	0	DEEP DELETION	1	0.00284091	mRNA HIGH	9	0.0255682	mRNA LOW	6	0.0170455	FUSION	0	0	MISSENSE, INFRAME, TRUNCATING MUTATIONS (PUTATIVE DRIVER)	0	0
IFNGR2	ALL	22	0.0625	AMPLIFICATION	0	0	DEEP DELETION	0	0	mRNA HIGH	16	0.0454545	mRNA LOW	6	0.0170455	FUSION	0	0	MISSENSE, INFRAME, TRUNCATING MUTATIONS (PUTATIVE DRIVER)	0	0
IGF1	ALL	12	0.0340909	AMPLIFICATION	0	0	DEEP DELETION	0	0	mRNA HIGH	12	0.0340909	mRNA LOW	0	0	FUSION	0	0	MISSENSE, INFRAME, TRUNCATING MUTATIONS (PUTATIVE DRIVER)	0	0
IGF1R	ALL	17	0.0482955	AMPLIFICATION	0	0	DEEP DELETION	0	0	mRNA HIGH	17	0.0482955	mRNA LOW	0	0	FUSION	0	0	MISSENSE, INFRAME, TRUNCATING MUTATIONS (PUTATIVE DRIVER)	0	0
IGFBP1	ALL	16	0.0454545	AMPLIFICATION	0	0	DEEP DELETION	0	0	mRNA HIGH	16	0.0454545	mRNA LOW	0	0	FUSION	0	0	MISSENSE, INFRAME, TRUNCATING MUTATIONS (PUTATIVE DRIVER)	0	0
IGFBP2	ALL	14	0.0397727	AMPLIFICATION	1	0.00284091	DEEP DELETION	1	0.00284091	mRNA HIGH	12	0.0340909	mRNA LOW	0	0	FUSION	0	0	MISSENSE, INFRAME, TRUNCATING MUTATIONS (PUTATIVE DRIVER)	0	0
IL1A	ALL	3	0.00852273	AMPLIFICATION	0	0	DEEP DELETION	0	0	mRNA HIGH	3	0.00852273	mRNA LOW	0	0	FUSION	0	0	MISSENSE, INFRAME, TRUNCATING MUTATIONS (PUTATIVE DRIVER)	0	0
IL1B	ALL	12	0.0340909	AMPLIFICATION	0	0	DEEP DELETION	0	0	mRNA HIGH	12	0.0340909	mRNA LOW	0	0	FUSION	0	0	MISSENSE, INFRAME, TRUNCATING MUTATIONS (PUTATIVE DRIVER)	0	0
IL6	ALL	4	0.0113636	AMPLIFICATION	0	0	DEEP DELETION	0	0	mRNA HIGH	4	0.0113636	mRNA LOW	0	0	FUSION	0	0	MISSENSE, INFRAME, TRUNCATING MUTATIONS (PUTATIVE DRIVER)	0	0
IL6R	ALL	15	0.0426136	AMPLIFICATION	1	0.00284091	DEEP DELETION	0	0	mRNA HIGH	14	0.0397727	mRNA LOW	0	0	FUSION	0	0	MISSENSE, INFRAME, TRUNCATING MUTATIONS (PUTATIVE DRIVER)	0	0
INS	ALL	2	0.00568182	AMPLIFICATION	0	0	DEEP DELETION	0	0	mRNA HIGH	2	0.00568182	mRNA LOW	0	0	FUSION	0	0	MISSENSE, INFRAME, TRUNCATING MUTATIONS (PUTATIVE DRIVER)	0	0
INSR	ALL	11	0.03125	AMPLIFICATION	0	0	DEEP DELETION	1	0.00284091	mRNA HIGH	10	0.0284091	mRNA LOW	0	0	FUSION	0	0	MISSENSE, INFRAME, TRUNCATING MUTATIONS (PUTATIVE DRIVER)	0	0
ITPR1	ALL	13	0.0369318	AMPLIFICATION	0	0	DEEP DELETION	10	0.0284091	mRNA HIGH	3	0.00852273	mRNA LOW	0	0	FUSION	0	0	MISSENSE, INFRAME, TRUNCATING MUTATIONS (PUTATIVE DRIVER)	0	0
ITPR2	ALL	9	0.0255682	AMPLIFICATION	0	0	DEEP DELETION	0	0	mRNA HIGH	9	0.0255682	mRNA LOW	0	0	FUSION	0	0	MISSENSE, INFRAME, TRUNCATING MUTATIONS (PUTATIVE DRIVER)	0	0
KCNK3	ALL	30	0.0852273	AMPLIFICATION	0	0	DEEP DELETION	0	0	mRNA HIGH	30	0.0852273	mRNA LOW	0	0	FUSION	0	0	MISSENSE, INFRAME, TRUNCATING MUTATIONS (PUTATIVE DRIVER)	0	0
KCNMA1	ALL	13	0.0369318	AMPLIFICATION	0	0	DEEP DELETION	0	0	mRNA HIGH	13	0.0369318	mRNA LOW	0	0	FUSION	0	0	MISSENSE, INFRAME, TRUNCATING MUTATIONS (PUTATIVE DRIVER)	0	0
LDHA	ALL	24	0.0681818	AMPLIFICATION	0	0	DEEP DELETION	0	0	mRNA HIGH	15	0.0426136	mRNA LOW	9	0.0255682	FUSION	0	0	MISSENSE, INFRAME, TRUNCATING MUTATIONS (PUTATIVE DRIVER)	0	0
LDHAL6A	ALL	4	0.0113636	AMPLIFICATION	0	0	DEEP DELETION	0	0	mRNA HIGH	4	0.0113636	mRNA LOW	0	0	FUSION	0	0	MISSENSE, INFRAME, TRUNCATING MUTATIONS (PUTATIVE DRIVER)	0	0
LDHAL6B	ALL	10	0.0284091	AMPLIFICATION	0	0	DEEP DELETION	0	0	mRNA HIGH	10	0.0284091	mRNA LOW	0	0	FUSION	0	0	MISSENSE, INFRAME, TRUNCATING MUTATIONS (PUTATIVE DRIVER)	0	0
LDHB	ALL	25	0.0710227	AMPLIFICATION	0	0	DEEP DELETION	0	0	mRNA HIGH	25	0.0710227	mRNA LOW	0	0	FUSION	0	0	MISSENSE, INFRAME, TRUNCATING MUTATIONS (PUTATIVE DRIVER)	0	0
LDHC	ALL	24	0.0681818	AMPLIFICATION	0	0	DEEP DELETION	0	0	mRNA HIGH	24	0.0681818	mRNA LOW	0	0	FUSION	0	0	MISSENSE, INFRAME, TRUNCATING MUTATIONS (PUTATIVE DRIVER)	0	0
LMNA	ALL	12	0.0340909	AMPLIFICATION	1	0.00284091	DEEP DELETION	0	0	mRNA HIGH	11	0.03125	mRNA LOW	0	0	FUSION	0	0	MISSENSE, INFRAME, TRUNCATING MUTATIONS (PUTATIVE DRIVER)	0	0
LTBR	ALL	43	0.122159	AMPLIFICATION	0	0	DEEP DELETION	0	0	mRNA HIGH	39	0.110795	mRNA LOW	4	0.0113636	FUSION	0	0	MISSENSE, INFRAME, TRUNCATING MUTATIONS (PUTATIVE DRIVER)	0	0
MAP2K1	ALL	22	0.0625	AMPLIFICATION	0	0	DEEP DELETION	0	0	mRNA HIGH	18	0.0511364	mRNA LOW	3	0.00852273	FUSION	1	0.00284091	MISSENSE, INFRAME, TRUNCATING MUTATIONS (PUTATIVE DRIVER)	0	0
MAP2K2	ALL	16	0.0454545	AMPLIFICATION	0	0	DEEP DELETION	2	0.00568182	mRNA HIGH	12	0.0340909	mRNA LOW	2	0.00568182	FUSION	0	0	MISSENSE, INFRAME, TRUNCATING MUTATIONS (PUTATIVE DRIVER)	0	0
MAPK1	ALL	22	0.0625	AMPLIFICATION	0	0	DEEP DELETION	0	0	mRNA HIGH	17	0.0482955	mRNA LOW	5	0.0142045	FUSION	0	0	MISSENSE, INFRAME, TRUNCATING MUTATIONS (PUTATIVE DRIVER)	0	0
MAPK3	ALL	24	0.0681818	AMPLIFICATION	0	0	DEEP DELETION	0	0	mRNA HIGH	15	0.0426136	mRNA LOW	9	0.0255682	FUSION	0	0	MISSENSE, INFRAME, TRUNCATING MUTATIONS (PUTATIVE DRIVER)	0	0
MDM2	ALL	23	0.0653409	AMPLIFICATION	0	0	DEEP DELETION	0	0	mRNA HIGH	23	0.0653409	mRNA LOW	0	0	FUSION	0	0	MISSENSE, INFRAME, TRUNCATING MUTATIONS (PUTATIVE DRIVER)	0	0
MDM4	ALL	16	0.0454545	AMPLIFICATION	1	0.00284091	DEEP DELETION	0	0	mRNA HIGH	15	0.0426136	mRNA LOW	0	0	FUSION	0	0	MISSENSE, INFRAME, TRUNCATING MUTATIONS (PUTATIVE DRIVER)	0	0
MKNK1	ALL	19	0.0539773	AMPLIFICATION	0	0	DEEP DELETION	0	0	mRNA HIGH	13	0.0369318	mRNA LOW	6	0.0170455	FUSION	0	0	MISSENSE, INFRAME, TRUNCATING MUTATIONS (PUTATIVE DRIVER)	0	0
MKNK2	ALL	8	0.0227273	AMPLIFICATION	0	0	DEEP DELETION	2	0.00568182	mRNA HIGH	5	0.0142045	mRNA LOW	1	0.00284091	FUSION	0	0	MISSENSE, INFRAME, TRUNCATING MUTATIONS (PUTATIVE DRIVER)	0	0
MMP14	ALL	11	0.03125	AMPLIFICATION	0	0	DEEP DELETION	0	0	mRNA HIGH	11	0.03125	mRNA LOW	0	0	FUSION	0	0	MISSENSE, INFRAME, TRUNCATING MUTATIONS (PUTATIVE DRIVER)	0	0
MMP2	ALL	11	0.03125	AMPLIFICATION	0	0	DEEP DELETION	0	0	mRNA HIGH	11	0.03125	mRNA LOW	0	0	FUSION	0	0	MISSENSE, INFRAME, TRUNCATING MUTATIONS (PUTATIVE DRIVER)	0	0
MMP3	ALL	2	0.00568182	AMPLIFICATION	0	0	DEEP DELETION	0	0	mRNA HIGH	2	0.00568182	mRNA LOW	0	0	FUSION	0	0	MISSENSE, INFRAME, TRUNCATING MUTATIONS (PUTATIVE DRIVER)	0	0
MT3	ALL	14	0.0397727	AMPLIFICATION	0	0	DEEP DELETION	0	0	mRNA HIGH	14	0.0397727	mRNA LOW	0	0	FUSION	0	0	MISSENSE, INFRAME, TRUNCATING MUTATIONS (PUTATIVE DRIVER)	0	0
MTOR	ALL	39	0.110795	AMPLIFICATION	0	0	DEEP DELETION	0	0	mRNA HIGH	12	0.0340909	mRNA LOW	7	0.0198864	FUSION	0	0	MISSENSE, INFRAME, TRUNCATING MUTATIONS (PUTATIVE DRIVER)	20	0.0568182
NDRG1	ALL	19	0.0539773	AMPLIFICATION	2	0.00568182	DEEP DELETION	0	0	mRNA HIGH	15	0.0426136	mRNA LOW	2	0.00568182	FUSION	0	0	MISSENSE, INFRAME, TRUNCATING MUTATIONS (PUTATIVE DRIVER)	0	0
NFKB1	ALL	22	0.0625	AMPLIFICATION	0	0	DEEP DELETION	0	0	mRNA HIGH	11	0.03125	mRNA LOW	11	0.03125	FUSION	0	0	MISSENSE, INFRAME, TRUNCATING MUTATIONS (PUTATIVE DRIVER)	0	0
NOS1	ALL	8	0.0227273	AMPLIFICATION	0	0	DEEP DELETION	0	0	mRNA HIGH	8	0.0227273	mRNA LOW	0	0	FUSION	0	0	MISSENSE, INFRAME, TRUNCATING MUTATIONS (PUTATIVE DRIVER)	0	0
NOS2	ALL	4	0.0113636	AMPLIFICATION	1	0.00284091	DEEP DELETION	0	0	mRNA HIGH	3	0.00852273	mRNA LOW	0	0	FUSION	0	0	MISSENSE, INFRAME, TRUNCATING MUTATIONS (PUTATIVE DRIVER)	0	0
NOS3	ALL	15	0.0426136	AMPLIFICATION	2	0.00568182	DEEP DELETION	0	0	mRNA HIGH	13	0.0369318	mRNA LOW	0	0	FUSION	0	0	MISSENSE, INFRAME, TRUNCATING MUTATIONS (PUTATIVE DRIVER)	0	0
NOTCH1	ALL	16	0.0454545	AMPLIFICATION	0	0	DEEP DELETION	2	0.00568182	mRNA HIGH	14	0.0397727	mRNA LOW	0	0	FUSION	0	0	MISSENSE, INFRAME, TRUNCATING MUTATIONS (PUTATIVE DRIVER)	0	0
NPEPPS	ALL	27	0.0767045	AMPLIFICATION	1	0.00284091	DEEP DELETION	0	0	mRNA HIGH	23	0.0653409	mRNA LOW	2	0.00568182	FUSION	1	0.00284091	MISSENSE, INFRAME, TRUNCATING MUTATIONS (PUTATIVE DRIVER)	0	0
NPPA	ALL	11	0.03125	AMPLIFICATION	0	0	DEEP DELETION	0	0	mRNA HIGH	11	0.03125	mRNA LOW	0	0	FUSION	0	0	MISSENSE, INFRAME, TRUNCATING MUTATIONS (PUTATIVE DRIVER)	0	0
NPPB	ALL	5	0.0142045	AMPLIFICATION	0	0	DEEP DELETION	0	0	mRNA HIGH	5	0.0142045	mRNA LOW	0	0	FUSION	0	0	MISSENSE, INFRAME, TRUNCATING MUTATIONS (PUTATIVE DRIVER)	0	0
NR4A2	ALL	8	0.0227273	AMPLIFICATION	0	0	DEEP DELETION	0	0	mRNA HIGH	8	0.0227273	mRNA LOW	0	0	FUSION	0	0	MISSENSE, INFRAME, TRUNCATING MUTATIONS (PUTATIVE DRIVER)	0	0
NRP1	ALL	23	0.0653409	AMPLIFICATION	0	0	DEEP DELETION	0	0	mRNA HIGH	10	0.0284091	mRNA LOW	13	0.0369318	FUSION	0	0	MISSENSE, INFRAME, TRUNCATING MUTATIONS (PUTATIVE DRIVER)	0	0
NRP2	ALL	16	0.0454545	AMPLIFICATION	3	0.00852273	DEEP DELETION	1	0.00284091	mRNA HIGH	12	0.0340909	mRNA LOW	0	0	FUSION	0	0	MISSENSE, INFRAME, TRUNCATING MUTATIONS (PUTATIVE DRIVER)	0	0
OS9	ALL	37	0.105114	AMPLIFICATION	0	0	DEEP DELETION	0	0	mRNA HIGH	32	0.0909091	mRNA LOW	5	0.0142045	FUSION	0	0	MISSENSE, INFRAME, TRUNCATING MUTATIONS (PUTATIVE DRIVER)	0	0
PAM	ALL	56	0.159091	AMPLIFICATION	6	0.0170455	DEEP DELETION	0	0	mRNA HIGH	44	0.125	mRNA LOW	6	0.0170455	FUSION	0	0	MISSENSE, INFRAME, TRUNCATING MUTATIONS (PUTATIVE DRIVER)	0	0
PDE5A	ALL	14	0.0397727	AMPLIFICATION	0	0	DEEP DELETION	0	0	mRNA HIGH	14	0.0397727	mRNA LOW	0	0	FUSION	0	0	MISSENSE, INFRAME, TRUNCATING MUTATIONS (PUTATIVE DRIVER)	0	0
PDGFB	ALL	12	0.0340909	AMPLIFICATION	0	0	DEEP DELETION	0	0	mRNA HIGH	12	0.0340909	mRNA LOW	0	0	FUSION	0	0	MISSENSE, INFRAME, TRUNCATING MUTATIONS (PUTATIVE DRIVER)	0	0
PDHA1	ALL	26	0.0738636	AMPLIFICATION	2	0.00568182	DEEP DELETION	0	0	mRNA HIGH	24	0.0681818	mRNA LOW	0	0	FUSION	0	0	MISSENSE, INFRAME, TRUNCATING MUTATIONS (PUTATIVE DRIVER)	0	0
PDHA2	ALL	15	0.0426136	AMPLIFICATION	0	0	DEEP DELETION	0	0	mRNA HIGH	15	0.0426136	mRNA LOW	0	0	FUSION	0	0	MISSENSE, INFRAME, TRUNCATING MUTATIONS (PUTATIVE DRIVER)	0	0
PDHB	ALL	14	0.0397727	AMPLIFICATION	0	0	DEEP DELETION	8	0.0227273	mRNA HIGH	6	0.0170455	mRNA LOW	0	0	FUSION	0	0	MISSENSE, INFRAME, TRUNCATING MUTATIONS (PUTATIVE DRIVER)	0	0
PDIA2	ALL	6	0.0170455	AMPLIFICATION	1	0.00284091	DEEP DELETION	0	0	mRNA HIGH	5	0.0142045	mRNA LOW	0	0	FUSION	0	0	MISSENSE, INFRAME, TRUNCATING MUTATIONS (PUTATIVE DRIVER)	0	0
PDK1	ALL	26	0.0738636	AMPLIFICATION	2	0.00568182	DEEP DELETION	0	0	mRNA HIGH	19	0.0539773	mRNA LOW	4	0.0113636	FUSION	1	0.00284091	MISSENSE, INFRAME, TRUNCATING MUTATIONS (PUTATIVE DRIVER)	0	0
PFKFB3	ALL	15	0.0426136	AMPLIFICATION	0	0	DEEP DELETION	0	0	mRNA HIGH	15	0.0426136	mRNA LOW	0	0	FUSION	0	0	MISSENSE, INFRAME, TRUNCATING MUTATIONS (PUTATIVE DRIVER)	0	0
PFKL	ALL	32	0.0909091	AMPLIFICATION	0	0	DEEP DELETION	0	0	mRNA HIGH	16	0.0454545	mRNA LOW	15	0.0426136	FUSION	1	0.00284091	MISSENSE, INFRAME, TRUNCATING MUTATIONS (PUTATIVE DRIVER)	0	0
PFKM	ALL	19	0.0539773	AMPLIFICATION	0	0	DEEP DELETION	0	0	mRNA HIGH	19	0.0539773	mRNA LOW	0	0	FUSION	0	0	MISSENSE, INFRAME, TRUNCATING MUTATIONS (PUTATIVE DRIVER)	0	0
PFKP	ALL	33	0.09375	AMPLIFICATION	0	0	DEEP DELETION	1	0.00284091	mRNA HIGH	16	0.0454545	mRNA LOW	15	0.0426136	FUSION	1	0.00284091	MISSENSE, INFRAME, TRUNCATING MUTATIONS (PUTATIVE DRIVER)	0	0
PGF	ALL	9	0.0255682	AMPLIFICATION	1	0.00284091	DEEP DELETION	0	0	mRNA HIGH	8	0.0227273	mRNA LOW	0	0	FUSION	0	0	MISSENSE, INFRAME, TRUNCATING MUTATIONS (PUTATIVE DRIVER)	0	0
PGK1	ALL	17	0.0482955	AMPLIFICATION	0	0	DEEP DELETION	0	0	mRNA HIGH	15	0.0426136	mRNA LOW	2	0.00568182	FUSION	0	0	MISSENSE, INFRAME, TRUNCATING MUTATIONS (PUTATIVE DRIVER)	0	0
PGK2	ALL	13	0.0369318	AMPLIFICATION	1	0.00284091	DEEP DELETION	0	0	mRNA HIGH	12	0.0340909	mRNA LOW	0	0	FUSION	0	0	MISSENSE, INFRAME, TRUNCATING MUTATIONS (PUTATIVE DRIVER)	0	0
PIK3CA	ALL	22	0.0625	AMPLIFICATION	7	0.0198864	DEEP DELETION	0	0	mRNA HIGH	9	0.0255682	mRNA LOW	2	0.00568182	FUSION	0	0	MISSENSE, INFRAME, TRUNCATING MUTATIONS (PUTATIVE DRIVER)	4	0.0113636
PIK3CB	ALL	17	0.0482955	AMPLIFICATION	2	0.00568182	DEEP DELETION	1	0.00284091	mRNA HIGH	12	0.0340909	mRNA LOW	1	0.00284091	FUSION	1	0.00284091	MISSENSE, INFRAME, TRUNCATING MUTATIONS (PUTATIVE DRIVER)	0	0
PIK3CD	ALL	17	0.0482955	AMPLIFICATION	0	0	DEEP DELETION	0	0	mRNA HIGH	17	0.0482955	mRNA LOW	0	0	FUSION	0	0	MISSENSE, INFRAME, TRUNCATING MUTATIONS (PUTATIVE DRIVER)	0	0
PIK3CG	ALL	15	0.0426136	AMPLIFICATION	2	0.00568182	DEEP DELETION	0	0	mRNA HIGH	13	0.0369318	mRNA LOW	0	0	FUSION	0	0	MISSENSE, INFRAME, TRUNCATING MUTATIONS (PUTATIVE DRIVER)	0	0
PIK3R1	ALL	16	0.0454545	AMPLIFICATION	0	0	DEEP DELETION	0	0	mRNA HIGH	16	0.0454545	mRNA LOW	0	0	FUSION	0	0	MISSENSE, INFRAME, TRUNCATING MUTATIONS (PUTATIVE DRIVER)	0	0
PIK3R2	ALL	19	0.0539773	AMPLIFICATION	0	0	DEEP DELETION	0	0	mRNA HIGH	16	0.0454545	mRNA LOW	3	0.00852273	FUSION	0	0	MISSENSE, INFRAME, TRUNCATING MUTATIONS (PUTATIVE DRIVER)	0	0
PIK3R3	ALL	12	0.0340909	AMPLIFICATION	0	0	DEEP DELETION	0	0	mRNA HIGH	12	0.0340909	mRNA LOW	0	0	FUSION	0	0	MISSENSE, INFRAME, TRUNCATING MUTATIONS (PUTATIVE DRIVER)	0	0
PKLR	ALL	22	0.0625	AMPLIFICATION	1	0.00284091	DEEP DELETION	0	0	mRNA HIGH	21	0.0596591	mRNA LOW	0	0	FUSION	0	0	MISSENSE, INFRAME, TRUNCATING MUTATIONS (PUTATIVE DRIVER)	0	0
PLCG1	ALL	21	0.0596591	AMPLIFICATION	0	0	DEEP DELETION	0	0	mRNA HIGH	17	0.0482955	mRNA LOW	4	0.0113636	FUSION	0	0	MISSENSE, INFRAME, TRUNCATING MUTATIONS (PUTATIVE DRIVER)	0	0
PLCG2	ALL	8	0.0227273	AMPLIFICATION	0	0	DEEP DELETION	0	0	mRNA HIGH	8	0.0227273	mRNA LOW	0	0	FUSION	0	0	MISSENSE, INFRAME, TRUNCATING MUTATIONS (PUTATIVE DRIVER)	0	0
PLOD1	ALL	11	0.03125	AMPLIFICATION	0	0	DEEP DELETION	0	0	mRNA HIGH	11	0.03125	mRNA LOW	0	0	FUSION	0	0	MISSENSE, INFRAME, TRUNCATING MUTATIONS (PUTATIVE DRIVER)	0	0
PLOD2	ALL	13	0.0369318	AMPLIFICATION	2	0.00568182	DEEP DELETION	0	0	mRNA HIGH	11	0.03125	mRNA LOW	0	0	FUSION	0	0	MISSENSE, INFRAME, TRUNCATING MUTATIONS (PUTATIVE DRIVER)	0	0
PMAIP1	ALL	14	0.0397727	AMPLIFICATION	1	0.00284091	DEEP DELETION	0	0	mRNA HIGH	13	0.0369318	mRNA LOW	0	0	FUSION	0	0	MISSENSE, INFRAME, TRUNCATING MUTATIONS (PUTATIVE DRIVER)	0	0
PML	ALL	20	0.0568182	AMPLIFICATION	0	0	DEEP DELETION	0	0	mRNA HIGH	11	0.03125	mRNA LOW	9	0.0255682	FUSION	0	0	MISSENSE, INFRAME, TRUNCATING MUTATIONS (PUTATIVE DRIVER)	0	0
POLR2A	ALL	27	0.0767045	AMPLIFICATION	0	0	DEEP DELETION	0	0	mRNA HIGH	16	0.0454545	mRNA LOW	11	0.03125	FUSION	0	0	MISSENSE, INFRAME, TRUNCATING MUTATIONS (PUTATIVE DRIVER)	0	0
PPARA	ALL	16	0.0454545	AMPLIFICATION	0	0	DEEP DELETION	0	0	mRNA HIGH	15	0.0426136	mRNA LOW	1	0.00284091	FUSION	0	0	MISSENSE, INFRAME, TRUNCATING MUTATIONS (PUTATIVE DRIVER)	0	0
PRKAA1	ALL	12	0.0340909	AMPLIFICATION	2	0.00568182	DEEP DELETION	0	0	mRNA HIGH	6	0.0170455	mRNA LOW	4	0.0113636	FUSION	0	0	MISSENSE, INFRAME, TRUNCATING MUTATIONS (PUTATIVE DRIVER)	0	0
PRKAA2	ALL	10	0.0284091	AMPLIFICATION	0	0	DEEP DELETION	0	0	mRNA HIGH	10	0.0284091	mRNA LOW	0	0	FUSION	0	0	MISSENSE, INFRAME, TRUNCATING MUTATIONS (PUTATIVE DRIVER)	0	0
PRKCA	ALL	12	0.0340909	AMPLIFICATION	1	0.00284091	DEEP DELETION	1	0.00284091	mRNA HIGH	10	0.0284091	mRNA LOW	0	0	FUSION	0	0	MISSENSE, INFRAME, TRUNCATING MUTATIONS (PUTATIVE DRIVER)	0	0
PRKCB	ALL	16	0.0454545	AMPLIFICATION	1	0.00284091	DEEP DELETION	0	0	mRNA HIGH	15	0.0426136	mRNA LOW	0	0	FUSION	0	0	MISSENSE, INFRAME, TRUNCATING MUTATIONS (PUTATIVE DRIVER)	0	0
PRKCG	ALL	4	0.0113636	AMPLIFICATION	0	0	DEEP DELETION	1	0.00284091	mRNA HIGH	3	0.00852273	mRNA LOW	0	0	FUSION	0	0	MISSENSE, INFRAME, TRUNCATING MUTATIONS (PUTATIVE DRIVER)	0	0
PSEN2	ALL	30	0.0852273	AMPLIFICATION	1	0.00284091	DEEP DELETION	0	0	mRNA HIGH	26	0.0738636	mRNA LOW	3	0.00852273	FUSION	0	0	MISSENSE, INFRAME, TRUNCATING MUTATIONS (PUTATIVE DRIVER)	0	0
PSMC3	ALL	22	0.0625	AMPLIFICATION	0	0	DEEP DELETION	0	0	mRNA HIGH	19	0.0539773	mRNA LOW	3	0.00852273	FUSION	0	0	MISSENSE, INFRAME, TRUNCATING MUTATIONS (PUTATIVE DRIVER)	0	0
RBX1	ALL	10	0.0284091	AMPLIFICATION	0	0	DEEP DELETION	0	0	mRNA HIGH	10	0.0284091	mRNA LOW	0	0	FUSION	0	0	MISSENSE, INFRAME, TRUNCATING MUTATIONS (PUTATIVE DRIVER)	0	0
RELA	ALL	16	0.0454545	AMPLIFICATION	0	0	DEEP DELETION	0	0	mRNA HIGH	8	0.0227273	mRNA LOW	8	0.0227273	FUSION	0	0	MISSENSE, INFRAME, TRUNCATING MUTATIONS (PUTATIVE DRIVER)	0	0
RPS6	ALL	8	0.0227273	AMPLIFICATION	0	0	DEEP DELETION	0	0	mRNA HIGH	8	0.0227273	mRNA LOW	0	0	FUSION	0	0	MISSENSE, INFRAME, TRUNCATING MUTATIONS (PUTATIVE DRIVER)	0	0
RPS6KB1	ALL	13	0.0369318	AMPLIFICATION	1	0.00284091	DEEP DELETION	0	0	mRNA HIGH	8	0.0227273	mRNA LOW	4	0.0113636	FUSION	0	0	MISSENSE, INFRAME, TRUNCATING MUTATIONS (PUTATIVE DRIVER)	0	0
RPS6KB2	ALL	18	0.0511364	AMPLIFICATION	0	0	DEEP DELETION	0	0	mRNA HIGH	15	0.0426136	mRNA LOW	3	0.00852273	FUSION	0	0	MISSENSE, INFRAME, TRUNCATING MUTATIONS (PUTATIVE DRIVER)	0	0
RYR1	ALL	8	0.0227273	AMPLIFICATION	0	0	DEEP DELETION	0	0	mRNA HIGH	8	0.0227273	mRNA LOW	0	0	FUSION	0	0	MISSENSE, INFRAME, TRUNCATING MUTATIONS (PUTATIVE DRIVER)	0	0
SATB1	ALL	11	0.03125	AMPLIFICATION	0	0	DEEP DELETION	9	0.0255682	mRNA HIGH	2	0.00568182	mRNA LOW	0	0	FUSION	0	0	MISSENSE, INFRAME, TRUNCATING MUTATIONS (PUTATIVE DRIVER)	0	0
SCNN1B	ALL	6	0.0170455	AMPLIFICATION	0	0	DEEP DELETION	0	0	mRNA HIGH	6	0.0170455	mRNA LOW	0	0	FUSION	0	0	MISSENSE, INFRAME, TRUNCATING MUTATIONS (PUTATIVE DRIVER)	0	0
SERPINE1	ALL	24	0.0681818	AMPLIFICATION	3	0.00852273	DEEP DELETION	0	0	mRNA HIGH	21	0.0596591	mRNA LOW	0	0	FUSION	0	0	MISSENSE, INFRAME, TRUNCATING MUTATIONS (PUTATIVE DRIVER)	0	0
SFRP1	ALL	12	0.0340909	AMPLIFICATION	1	0.00284091	DEEP DELETION	3	0.00852273	mRNA HIGH	8	0.0227273	mRNA LOW	0	0	FUSION	0	0	MISSENSE, INFRAME, TRUNCATING MUTATIONS (PUTATIVE DRIVER)	0	0
SHC1	ALL	18	0.0511364	AMPLIFICATION	1	0.00284091	DEEP DELETION	0	0	mRNA HIGH	17	0.0482955	mRNA LOW	0	0	FUSION	0	0	MISSENSE, INFRAME, TRUNCATING MUTATIONS (PUTATIVE DRIVER)	0	0
SLC29A1	ALL	19	0.0539773	AMPLIFICATION	1	0.00284091	DEEP DELETION	0	0	mRNA HIGH	17	0.0482955	mRNA LOW	0	0	FUSION	1	0.00284091	MISSENSE, INFRAME, TRUNCATING MUTATIONS (PUTATIVE DRIVER)	0	0
SLC2A1	ALL	14	0.0397727	AMPLIFICATION	0	0	DEEP DELETION	0	0	mRNA HIGH	14	0.0397727	mRNA LOW	0	0	FUSION	0	0	MISSENSE, INFRAME, TRUNCATING MUTATIONS (PUTATIVE DRIVER)	0	0
SLC8A1	ALL	19	0.0539773	AMPLIFICATION	1	0.00284091	DEEP DELETION	1	0.00284091	mRNA HIGH	17	0.0482955	mRNA LOW	0	0	FUSION	0	0	MISSENSE, INFRAME, TRUNCATING MUTATIONS (PUTATIVE DRIVER)	0	0
SMAD3	ALL	16	0.0454545	AMPLIFICATION	0	0	DEEP DELETION	0	0	mRNA HIGH	11	0.03125	mRNA LOW	3	0.00852273	FUSION	2	0.00568182	MISSENSE, INFRAME, TRUNCATING MUTATIONS (PUTATIVE DRIVER)	0	0
SMAD4	ALL	30	0.0852273	AMPLIFICATION	1	0.00284091	DEEP DELETION	0	0	mRNA HIGH	13	0.0369318	mRNA LOW	16	0.0454545	FUSION	0	0	MISSENSE, INFRAME, TRUNCATING MUTATIONS (PUTATIVE DRIVER)	0	0
SNAI3	ALL	17	0.0482955	AMPLIFICATION	0	0	DEEP DELETION	0	0	mRNA HIGH	17	0.0482955	mRNA LOW	0	0	FUSION	0	0	MISSENSE, INFRAME, TRUNCATING MUTATIONS (PUTATIVE DRIVER)	0	0
SOD2	ALL	17	0.0482955	AMPLIFICATION	0	0	DEEP DELETION	1	0.00284091	mRNA HIGH	16	0.0454545	mRNA LOW	0	0	FUSION	0	0	MISSENSE, INFRAME, TRUNCATING MUTATIONS (PUTATIVE DRIVER)	0	0
SOD3	ALL	14	0.0397727	AMPLIFICATION	0	0	DEEP DELETION	0	0	mRNA HIGH	14	0.0397727	mRNA LOW	0	0	FUSION	0	0	MISSENSE, INFRAME, TRUNCATING MUTATIONS (PUTATIVE DRIVER)	0	0
SPRY2	ALL	11	0.03125	AMPLIFICATION	0	0	DEEP DELETION	0	0	mRNA HIGH	11	0.03125	mRNA LOW	0	0	FUSION	0	0	MISSENSE, INFRAME, TRUNCATING MUTATIONS (PUTATIVE DRIVER)	0	0
STAT3	ALL	26	0.0738636	AMPLIFICATION	1	0.00284091	DEEP DELETION	0	0	mRNA HIGH	16	0.0454545	mRNA LOW	9	0.0255682	FUSION	0	0	MISSENSE, INFRAME, TRUNCATING MUTATIONS (PUTATIVE DRIVER)	0	0
STAT5B	ALL	20	0.0568182	AMPLIFICATION	1	0.00284091	DEEP DELETION	0	0	mRNA HIGH	6	0.0170455	mRNA LOW	13	0.0369318	FUSION	0	0	MISSENSE, INFRAME, TRUNCATING MUTATIONS (PUTATIVE DRIVER)	0	0
STC1	ALL	21	0.0596591	AMPLIFICATION	0	0	DEEP DELETION	4	0.0113636	mRNA HIGH	17	0.0482955	mRNA LOW	0	0	FUSION	0	0	MISSENSE, INFRAME, TRUNCATING MUTATIONS (PUTATIVE DRIVER)	0	0
STC2	ALL	54	0.153409	AMPLIFICATION	27	0.0767045	DEEP DELETION	0	0	mRNA HIGH	27	0.0767045	mRNA LOW	0	0	FUSION	0	0	MISSENSE, INFRAME, TRUNCATING MUTATIONS (PUTATIVE DRIVER)	0	0
TEK	ALL	13	0.0369318	AMPLIFICATION	0	0	DEEP DELETION	0	0	mRNA HIGH	13	0.0369318	mRNA LOW	0	0	FUSION	0	0	MISSENSE, INFRAME, TRUNCATING MUTATIONS (PUTATIVE DRIVER)	0	0
TF	ALL	6	0.0170455	AMPLIFICATION	2	0.00568182	DEEP DELETION	0	0	mRNA HIGH	4	0.0113636	mRNA LOW	0	0	FUSION	0	0	MISSENSE, INFRAME, TRUNCATING MUTATIONS (PUTATIVE DRIVER)	0	0
TFRC	ALL	24	0.0681818	AMPLIFICATION	4	0.0113636	DEEP DELETION	0	0	mRNA HIGH	20	0.0568182	mRNA LOW	0	0	FUSION	0	0	MISSENSE, INFRAME, TRUNCATING MUTATIONS (PUTATIVE DRIVER)	0	0
TGFA	ALL	15	0.0426136	AMPLIFICATION	0	0	DEEP DELETION	0	0	mRNA HIGH	15	0.0426136	mRNA LOW	0	0	FUSION	0	0	MISSENSE, INFRAME, TRUNCATING MUTATIONS (PUTATIVE DRIVER)	0	0
TGFB1	ALL	9	0.0255682	AMPLIFICATION	0	0	DEEP DELETION	0	0	mRNA HIGH	9	0.0255682	mRNA LOW	0	0	FUSION	0	0	MISSENSE, INFRAME, TRUNCATING MUTATIONS (PUTATIVE DRIVER)	0	0
TGFB2	ALL	12	0.0340909	AMPLIFICATION	1	0.00284091	DEEP DELETION	0	0	mRNA HIGH	11	0.03125	mRNA LOW	0	0	FUSION	0	0	MISSENSE, INFRAME, TRUNCATING MUTATIONS (PUTATIVE DRIVER)	0	0
TGFB3	ALL	12	0.0340909	AMPLIFICATION	0	0	DEEP DELETION	0	0	mRNA HIGH	12	0.0340909	mRNA LOW	0	0	FUSION	0	0	MISSENSE, INFRAME, TRUNCATING MUTATIONS (PUTATIVE DRIVER)	0	0
TGFBR1	ALL	17	0.0482955	AMPLIFICATION	0	0	DEEP DELETION	0	0	mRNA HIGH	17	0.0482955	mRNA LOW	0	0	FUSION	0	0	MISSENSE, INFRAME, TRUNCATING MUTATIONS (PUTATIVE DRIVER)	0	0
TH	ALL	4	0.0113636	AMPLIFICATION	0	0	DEEP DELETION	0	0	mRNA HIGH	4	0.0113636	mRNA LOW	0	0	FUSION	0	0	MISSENSE, INFRAME, TRUNCATING MUTATIONS (PUTATIVE DRIVER)	0	0
THBS1	ALL	14	0.0397727	AMPLIFICATION	0	0	DEEP DELETION	1	0.00284091	mRNA HIGH	13	0.0369318	mRNA LOW	0	0	FUSION	0	0	MISSENSE, INFRAME, TRUNCATING MUTATIONS (PUTATIVE DRIVER)	0	0
TIMP1	ALL	19	0.0539773	AMPLIFICATION	1	0.00284091	DEEP DELETION	0	0	mRNA HIGH	18	0.0511364	mRNA LOW	0	0	FUSION	0	0	MISSENSE, INFRAME, TRUNCATING MUTATIONS (PUTATIVE DRIVER)	0	0
TLR4	ALL	7	0.0198864	AMPLIFICATION	0	0	DEEP DELETION	0	0	mRNA HIGH	7	0.0198864	mRNA LOW	0	0	FUSION	0	0	MISSENSE, INFRAME, TRUNCATING MUTATIONS (PUTATIVE DRIVER)	0	0
TNC	ALL	20	0.0568182	AMPLIFICATION	0	0	DEEP DELETION	0	0	mRNA HIGH	20	0.0568182	mRNA LOW	0	0	FUSION	0	0	MISSENSE, INFRAME, TRUNCATING MUTATIONS (PUTATIVE DRIVER)	0	0
TNF	ALL	15	0.0426136	AMPLIFICATION	0	0	DEEP DELETION	0	0	mRNA HIGH	15	0.0426136	mRNA LOW	0	0	FUSION	0	0	MISSENSE, INFRAME, TRUNCATING MUTATIONS (PUTATIVE DRIVER)	0	0
TP53	ALL	36	0.102273	AMPLIFICATION	0	0	DEEP DELETION	0	0	mRNA HIGH	16	0.0454545	mRNA LOW	9	0.0255682	FUSION	0	0	MISSENSE, INFRAME, TRUNCATING MUTATIONS (PUTATIVE DRIVER)	11	0.03125
TSC2	ALL	22	0.0625	AMPLIFICATION	0	0	DEEP DELETION	0	0	mRNA HIGH	11	0.03125	mRNA LOW	9	0.0255682	FUSION	0	0	MISSENSE, INFRAME, TRUNCATING MUTATIONS (PUTATIVE DRIVER)	2	0.00568182
UBE2B	ALL	43	0.122159	AMPLIFICATION	19	0.0539773	DEEP DELETION	0	0	mRNA HIGH	24	0.0681818	mRNA LOW	0	0	FUSION	0	0	MISSENSE, INFRAME, TRUNCATING MUTATIONS (PUTATIVE DRIVER)	0	0
UCP2	ALL	16	0.0454545	AMPLIFICATION	0	0	DEEP DELETION	0	0	mRNA HIGH	16	0.0454545	mRNA LOW	0	0	FUSION	0	0	MISSENSE, INFRAME, TRUNCATING MUTATIONS (PUTATIVE DRIVER)	0	0
USF1	ALL	21	0.0596591	AMPLIFICATION	1	0.00284091	DEEP DELETION	0	0	mRNA HIGH	17	0.0482955	mRNA LOW	3	0.00852273	FUSION	0	0	MISSENSE, INFRAME, TRUNCATING MUTATIONS (PUTATIVE DRIVER)	0	0
VCAM1	ALL	17	0.0482955	AMPLIFICATION	0	0	DEEP DELETION	0	0	mRNA HIGH	17	0.0482955	mRNA LOW	0	0	FUSION	0	0	MISSENSE, INFRAME, TRUNCATING MUTATIONS (PUTATIVE DRIVER)	0	0
VEGFA	ALL	16	0.0454545	AMPLIFICATION	2	0.00568182	DEEP DELETION	0	0	mRNA HIGH	14	0.0397727	mRNA LOW	0	0	FUSION	0	0	MISSENSE, INFRAME, TRUNCATING MUTATIONS (PUTATIVE DRIVER)	0	0
VEGFC	ALL	17	0.0482955	AMPLIFICATION	0	0	DEEP DELETION	0	0	mRNA HIGH	17	0.0482955	mRNA LOW	0	0	FUSION	0	0	MISSENSE, INFRAME, TRUNCATING MUTATIONS (PUTATIVE DRIVER)	0	0
VHL	ALL	172	0.488636	AMPLIFICATION	0	0	DEEP DELETION	9	0.0255682	mRNA HIGH	2	0.00568182	mRNA LOW	0	0	FUSION	2	0.00568182	MISSENSE, INFRAME, TRUNCATING MUTATIONS (PUTATIVE DRIVER)	159	0.451705
VLDLR	ALL	24	0.0681818	AMPLIFICATION	1	0.00284091	DEEP DELETION	0	0	mRNA HIGH	22	0.0625	mRNA LOW	0	0	FUSION	1	0.00284091	MISSENSE, INFRAME, TRUNCATING MUTATIONS (PUTATIVE DRIVER)	0	0

## Sheet: ST_9
Supplementary Table 9. Frequency of genetic alterations in the hypoxia-related genes of 345 individuals with liver hepatocellular carcinoma from the TCGA Pan-Cancer Atlas project (TCGA-LIHC-PanCancer).
GENE	TYPE	TOTAL	FREQUENCY	TYPE	TOTAL	FREQUENCY	TYPE	TOTAL	FREQUENCY	TYPE	TOTAL	FREQUENCY	TYPE	TOTAL	FREQUENCY	TYPE	TOTAL	FREQUENCY	TYPE	TOTAL	FREQUENCY
ACTN4	ALL	23	0.0666667	AMPLIFICATION	2	0.0057971	DEEP DELETION	0	0	mRNA HIGH	20	0.057971	mRNA LOW	0	0	FUSION	1	0.00289855	MISSENSE, INFRAME, TRUNCATING MUTATIONS (PUTATIVE DRIVER)	0	0
ADA	ALL	19	0.0550725	AMPLIFICATION	0	0	DEEP DELETION	0	0	mRNA HIGH	19	0.0550725	mRNA LOW	0	0	FUSION	0	0	MISSENSE, INFRAME, TRUNCATING MUTATIONS (PUTATIVE DRIVER)	0	0
ADAM8	ALL	15	0.0434783	AMPLIFICATION	0	0	DEEP DELETION	0	0	mRNA HIGH	15	0.0434783	mRNA LOW	0	0	FUSION	0	0	MISSENSE, INFRAME, TRUNCATING MUTATIONS (PUTATIVE DRIVER)	0	0
ADM	ALL	14	0.0405797	AMPLIFICATION	1	0.00289855	DEEP DELETION	0	0	mRNA HIGH	13	0.0376812	mRNA LOW	0	0	FUSION	0	0	MISSENSE, INFRAME, TRUNCATING MUTATIONS (PUTATIVE DRIVER)	0	0
ADORA1	ALL	39	0.113043	AMPLIFICATION	22	0.0637681	DEEP DELETION	0	0	mRNA HIGH	17	0.0492754	mRNA LOW	0	0	FUSION	0	0	MISSENSE, INFRAME, TRUNCATING MUTATIONS (PUTATIVE DRIVER)	0	0
ADRA1B	ALL	18	0.0521739	AMPLIFICATION	0	0	DEEP DELETION	0	0	mRNA HIGH	18	0.0521739	mRNA LOW	0	0	FUSION	0	0	MISSENSE, INFRAME, TRUNCATING MUTATIONS (PUTATIVE DRIVER)	0	0
AKT1	ALL	48	0.13913	AMPLIFICATION	1	0.00289855	DEEP DELETION	4	0.0115942	mRNA HIGH	19	0.0550725	mRNA LOW	24	0.0695652	FUSION	0	0	MISSENSE, INFRAME, TRUNCATING MUTATIONS (PUTATIVE DRIVER)	0	0
AKT2	ALL	35	0.101449	AMPLIFICATION	4	0.0115942	DEEP DELETION	0	0	mRNA HIGH	26	0.0753623	mRNA LOW	5	0.0144928	FUSION	0	0	MISSENSE, INFRAME, TRUNCATING MUTATIONS (PUTATIVE DRIVER)	0	0
AKT3	ALL	38	0.110145	AMPLIFICATION	22	0.0637681	DEEP DELETION	0	0	mRNA HIGH	16	0.0463768	mRNA LOW	0	0	FUSION	0	0	MISSENSE, INFRAME, TRUNCATING MUTATIONS (PUTATIVE DRIVER)	0	0
ALAS2	ALL	9	0.026087	AMPLIFICATION	2	0.0057971	DEEP DELETION	4	0.0115942	mRNA HIGH	2	0.0057971	mRNA LOW	0	0	FUSION	1	0.00289855	MISSENSE, INFRAME, TRUNCATING MUTATIONS (PUTATIVE DRIVER)	0	0
ALDOA	ALL	20	0.057971	AMPLIFICATION	1	0.00289855	DEEP DELETION	0	0	mRNA HIGH	19	0.0550725	mRNA LOW	0	0	FUSION	0	0	MISSENSE, INFRAME, TRUNCATING MUTATIONS (PUTATIVE DRIVER)	0	0
ALDOB	ALL	19	0.0550725	AMPLIFICATION	0	0	DEEP DELETION	0	0	mRNA HIGH	17	0.0492754	mRNA LOW	0	0	FUSION	2	0.0057971	MISSENSE, INFRAME, TRUNCATING MUTATIONS (PUTATIVE DRIVER)	0	0
ALDOC	ALL	30	0.0869565	AMPLIFICATION	3	0.00869565	DEEP DELETION	0	0	mRNA HIGH	27	0.0782609	mRNA LOW	0	0	FUSION	0	0	MISSENSE, INFRAME, TRUNCATING MUTATIONS (PUTATIVE DRIVER)	0	0
ANG	ALL	17	0.0492754	AMPLIFICATION	2	0.0057971	DEEP DELETION	0	0	mRNA HIGH	15	0.0434783	mRNA LOW	0	0	FUSION	0	0	MISSENSE, INFRAME, TRUNCATING MUTATIONS (PUTATIVE DRIVER)	0	0
ANGPT1	ALL	60	0.173913	AMPLIFICATION	33	0.0956522	DEEP DELETION	1	0.00289855	mRNA HIGH	26	0.0753623	mRNA LOW	0	0	FUSION	0	0	MISSENSE, INFRAME, TRUNCATING MUTATIONS (PUTATIVE DRIVER)	0	0
ANGPT2	ALL	47	0.136232	AMPLIFICATION	0	0	DEEP DELETION	22	0.0637681	mRNA HIGH	25	0.0724638	mRNA LOW	0	0	FUSION	0	0	MISSENSE, INFRAME, TRUNCATING MUTATIONS (PUTATIVE DRIVER)	0	0
ANGPT4	ALL	9	0.026087	AMPLIFICATION	1	0.00289855	DEEP DELETION	0	0	mRNA HIGH	8	0.0231884	mRNA LOW	0	0	FUSION	0	0	MISSENSE, INFRAME, TRUNCATING MUTATIONS (PUTATIVE DRIVER)	0	0
ANGPTL4	ALL	22	0.0637681	AMPLIFICATION	0	0	DEEP DELETION	1	0.00289855	mRNA HIGH	20	0.057971	mRNA LOW	0	0	FUSION	1	0.00289855	MISSENSE, INFRAME, TRUNCATING MUTATIONS (PUTATIVE DRIVER)	0	0
AQP1	ALL	5	0.0144928	AMPLIFICATION	0	0	DEEP DELETION	0	0	mRNA HIGH	5	0.0144928	mRNA LOW	0	0	FUSION	0	0	MISSENSE, INFRAME, TRUNCATING MUTATIONS (PUTATIVE DRIVER)	0	0
ARG2	ALL	5	0.0144928	AMPLIFICATION	0	0	DEEP DELETION	0	0	mRNA HIGH	5	0.0144928	mRNA LOW	0	0	FUSION	0	0	MISSENSE, INFRAME, TRUNCATING MUTATIONS (PUTATIVE DRIVER)	0	0
ARNT	ALL	137	0.397101	AMPLIFICATION	38	0.110145	DEEP DELETION	0	0	mRNA HIGH	98	0.284058	mRNA LOW	1	0.00289855	FUSION	0	0	MISSENSE, INFRAME, TRUNCATING MUTATIONS (PUTATIVE DRIVER)	0	0
ARNT2	ALL	26	0.0753623	AMPLIFICATION	0	0	DEEP DELETION	0	0	mRNA HIGH	26	0.0753623	mRNA LOW	0	0	FUSION	0	0	MISSENSE, INFRAME, TRUNCATING MUTATIONS (PUTATIVE DRIVER)	0	0
ASCL2	ALL	15	0.0434783	AMPLIFICATION	1	0.00289855	DEEP DELETION	0	0	mRNA HIGH	14	0.0405797	mRNA LOW	0	0	FUSION	0	0	MISSENSE, INFRAME, TRUNCATING MUTATIONS (PUTATIVE DRIVER)	0	0
ATP1A1	ALL	12	0.0347826	AMPLIFICATION	0	0	DEEP DELETION	0	0	mRNA HIGH	12	0.0347826	mRNA LOW	0	0	FUSION	0	0	MISSENSE, INFRAME, TRUNCATING MUTATIONS (PUTATIVE DRIVER)	0	0
ATP1A2	ALL	43	0.124638	AMPLIFICATION	34	0.0985507	DEEP DELETION	0	0	mRNA HIGH	9	0.026087	mRNA LOW	0	0	FUSION	0	0	MISSENSE, INFRAME, TRUNCATING MUTATIONS (PUTATIVE DRIVER)	0	0
ATP1B1	ALL	50	0.144928	AMPLIFICATION	30	0.0869565	DEEP DELETION	0	0	mRNA HIGH	20	0.057971	mRNA LOW	0	0	FUSION	0	0	MISSENSE, INFRAME, TRUNCATING MUTATIONS (PUTATIVE DRIVER)	0	0
BACH1	ALL	13	0.0376812	AMPLIFICATION	0	0	DEEP DELETION	1	0.00289855	mRNA HIGH	12	0.0347826	mRNA LOW	0	0	FUSION	0	0	MISSENSE, INFRAME, TRUNCATING MUTATIONS (PUTATIVE DRIVER)	0	0
BAD	ALL	12	0.0347826	AMPLIFICATION	0	0	DEEP DELETION	1	0.00289855	mRNA HIGH	11	0.0318841	mRNA LOW	0	0	FUSION	0	0	MISSENSE, INFRAME, TRUNCATING MUTATIONS (PUTATIVE DRIVER)	0	0
BBC3	ALL	20	0.057971	AMPLIFICATION	1	0.00289855	DEEP DELETION	0	0	mRNA HIGH	19	0.0550725	mRNA LOW	0	0	FUSION	0	0	MISSENSE, INFRAME, TRUNCATING MUTATIONS (PUTATIVE DRIVER)	0	0
BCL2	ALL	11	0.0318841	AMPLIFICATION	0	0	DEEP DELETION	0	0	mRNA HIGH	10	0.0289855	mRNA LOW	0	0	FUSION	1	0.00289855	MISSENSE, INFRAME, TRUNCATING MUTATIONS (PUTATIVE DRIVER)	0	0
BNIP3	ALL	20	0.057971	AMPLIFICATION	0	0	DEEP DELETION	0	0	mRNA HIGH	12	0.0347826	mRNA LOW	8	0.0231884	FUSION	0	0	MISSENSE, INFRAME, TRUNCATING MUTATIONS (PUTATIVE DRIVER)	0	0
CAMK2A	ALL	15	0.0434783	AMPLIFICATION	2	0.0057971	DEEP DELETION	0	0	mRNA HIGH	13	0.0376812	mRNA LOW	0	0	FUSION	0	0	MISSENSE, INFRAME, TRUNCATING MUTATIONS (PUTATIVE DRIVER)	0	0
CAMK2B	ALL	19	0.0550725	AMPLIFICATION	2	0.0057971	DEEP DELETION	0	0	mRNA HIGH	17	0.0492754	mRNA LOW	0	0	FUSION	0	0	MISSENSE, INFRAME, TRUNCATING MUTATIONS (PUTATIVE DRIVER)	0	0
CAMK2D	ALL	15	0.0434783	AMPLIFICATION	1	0.00289855	DEEP DELETION	0	0	mRNA HIGH	13	0.0376812	mRNA LOW	1	0.00289855	FUSION	0	0	MISSENSE, INFRAME, TRUNCATING MUTATIONS (PUTATIVE DRIVER)	0	0
CAMK2G	ALL	19	0.0550725	AMPLIFICATION	3	0.00869565	DEEP DELETION	0	0	mRNA HIGH	14	0.0405797	mRNA LOW	2	0.0057971	FUSION	0	0	MISSENSE, INFRAME, TRUNCATING MUTATIONS (PUTATIVE DRIVER)	0	0
CASR	ALL	13	0.0376812	AMPLIFICATION	0	0	DEEP DELETION	0	0	mRNA HIGH	13	0.0376812	mRNA LOW	0	0	FUSION	0	0	MISSENSE, INFRAME, TRUNCATING MUTATIONS (PUTATIVE DRIVER)	0	0
CAV1	ALL	26	0.0753623	AMPLIFICATION	8	0.0231884	DEEP DELETION	0	0	mRNA HIGH	17	0.0492754	mRNA LOW	0	0	FUSION	1	0.00289855	MISSENSE, INFRAME, TRUNCATING MUTATIONS (PUTATIVE DRIVER)	0	0
CCL2	ALL	19	0.0550725	AMPLIFICATION	4	0.0115942	DEEP DELETION	2	0.0057971	mRNA HIGH	13	0.0376812	mRNA LOW	0	0	FUSION	0	0	MISSENSE, INFRAME, TRUNCATING MUTATIONS (PUTATIVE DRIVER)	0	0
CD24	ALL	0	0	AMPLIFICATION	0	0	DEEP DELETION	0	0	mRNA HIGH	0	0	mRNA LOW	0	0	FUSION	0	0	MISSENSE, INFRAME, TRUNCATING MUTATIONS (PUTATIVE DRIVER)	0	0
CDH1	ALL	18	0.0521739	AMPLIFICATION	0	0	DEEP DELETION	0	0	mRNA HIGH	15	0.0434783	mRNA LOW	0	0	FUSION	0	0	MISSENSE, INFRAME, TRUNCATING MUTATIONS (PUTATIVE DRIVER)	3	0.00869565
CDKN1A	ALL	32	0.0927536	AMPLIFICATION	5	0.0144928	DEEP DELETION	1	0.00289855	mRNA HIGH	22	0.0637681	mRNA LOW	0	0	FUSION	0	0	MISSENSE, INFRAME, TRUNCATING MUTATIONS (PUTATIVE DRIVER)	4	0.0115942
CDKN1B	ALL	23	0.0666667	AMPLIFICATION	1	0.00289855	DEEP DELETION	1	0.00289855	mRNA HIGH	13	0.0376812	mRNA LOW	5	0.0144928	FUSION	0	0	MISSENSE, INFRAME, TRUNCATING MUTATIONS (PUTATIVE DRIVER)	3	0.00869565
CHRNA7	ALL	9	0.026087	AMPLIFICATION	0	0	DEEP DELETION	2	0.0057971	mRNA HIGH	7	0.0202899	mRNA LOW	0	0	FUSION	0	0	MISSENSE, INFRAME, TRUNCATING MUTATIONS (PUTATIVE DRIVER)	0	0
CHRNB2	ALL	64	0.185507	AMPLIFICATION	36	0.104348	DEEP DELETION	0	0	mRNA HIGH	28	0.0811594	mRNA LOW	0	0	FUSION	0	0	MISSENSE, INFRAME, TRUNCATING MUTATIONS (PUTATIVE DRIVER)	0	0
CIAO3	ALL	19	0.0550725	AMPLIFICATION	1	0.00289855	DEEP DELETION	3	0.00869565	mRNA HIGH	14	0.0405797	mRNA LOW	1	0.00289855	FUSION	0	0	MISSENSE, INFRAME, TRUNCATING MUTATIONS (PUTATIVE DRIVER)	0	0
CITED2	ALL	19	0.0550725	AMPLIFICATION	0	0	DEEP DELETION	4	0.0115942	mRNA HIGH	15	0.0434783	mRNA LOW	0	0	FUSION	0	0	MISSENSE, INFRAME, TRUNCATING MUTATIONS (PUTATIVE DRIVER)	0	0
CLDN3	ALL	30	0.0869565	AMPLIFICATION	4	0.0115942	DEEP DELETION	0	0	mRNA HIGH	26	0.0753623	mRNA LOW	0	0	FUSION	0	0	MISSENSE, INFRAME, TRUNCATING MUTATIONS (PUTATIVE DRIVER)	0	0
COPS5	ALL	144	0.417391	AMPLIFICATION	22	0.0637681	DEEP DELETION	0	0	mRNA HIGH	117	0.33913	mRNA LOW	4	0.0115942	FUSION	1	0.00289855	MISSENSE, INFRAME, TRUNCATING MUTATIONS (PUTATIVE DRIVER)	0	0
CREBBP	ALL	16	0.0463768	AMPLIFICATION	0	0	DEEP DELETION	1	0.00289855	mRNA HIGH	12	0.0347826	mRNA LOW	1	0.00289855	FUSION	1	0.00289855	MISSENSE, INFRAME, TRUNCATING MUTATIONS (PUTATIVE DRIVER)	1	0.00289855
CUL2	ALL	34	0.0985507	AMPLIFICATION	6	0.0173913	DEEP DELETION	0	0	mRNA HIGH	24	0.0695652	mRNA LOW	4	0.0115942	FUSION	0	0	MISSENSE, INFRAME, TRUNCATING MUTATIONS (PUTATIVE DRIVER)	0	0
CXCR4	ALL	18	0.0521739	AMPLIFICATION	0	0	DEEP DELETION	1	0.00289855	mRNA HIGH	17	0.0492754	mRNA LOW	0	0	FUSION	0	0	MISSENSE, INFRAME, TRUNCATING MUTATIONS (PUTATIVE DRIVER)	0	0
CYBB	ALL	15	0.0434783	AMPLIFICATION	0	0	DEEP DELETION	4	0.0115942	mRNA HIGH	11	0.0318841	mRNA LOW	0	0	FUSION	0	0	MISSENSE, INFRAME, TRUNCATING MUTATIONS (PUTATIVE DRIVER)	0	0
CYP1A1	ALL	7	0.0202899	AMPLIFICATION	0	0	DEEP DELETION	0	0	mRNA HIGH	7	0.0202899	mRNA LOW	0	0	FUSION	0	0	MISSENSE, INFRAME, TRUNCATING MUTATIONS (PUTATIVE DRIVER)	0	0
DDIT4	ALL	17	0.0492754	AMPLIFICATION	3	0.00869565	DEEP DELETION	0	0	mRNA HIGH	14	0.0405797	mRNA LOW	0	0	FUSION	0	0	MISSENSE, INFRAME, TRUNCATING MUTATIONS (PUTATIVE DRIVER)	0	0
DPP4	ALL	35	0.101449	AMPLIFICATION	3	0.00869565	DEEP DELETION	3	0.00869565	mRNA HIGH	28	0.0811594	mRNA LOW	0	0	FUSION	1	0.00289855	MISSENSE, INFRAME, TRUNCATING MUTATIONS (PUTATIVE DRIVER)	0	0
E2F1	ALL	14	0.0405797	AMPLIFICATION	3	0.00869565	DEEP DELETION	0	0	mRNA HIGH	11	0.0318841	mRNA LOW	0	0	FUSION	0	0	MISSENSE, INFRAME, TRUNCATING MUTATIONS (PUTATIVE DRIVER)	0	0
EDN1	ALL	15	0.0434783	AMPLIFICATION	8	0.0231884	DEEP DELETION	0	0	mRNA HIGH	7	0.0202899	mRNA LOW	0	0	FUSION	0	0	MISSENSE, INFRAME, TRUNCATING MUTATIONS (PUTATIVE DRIVER)	0	0
EDNRA	ALL	13	0.0376812	AMPLIFICATION	0	0	DEEP DELETION	0	0	mRNA HIGH	13	0.0376812	mRNA LOW	0	0	FUSION	0	0	MISSENSE, INFRAME, TRUNCATING MUTATIONS (PUTATIVE DRIVER)	0	0
EDNRB	ALL	13	0.0376812	AMPLIFICATION	2	0.0057971	DEEP DELETION	2	0.0057971	mRNA HIGH	9	0.026087	mRNA LOW	0	0	FUSION	0	0	MISSENSE, INFRAME, TRUNCATING MUTATIONS (PUTATIVE DRIVER)	0	0
EGF	ALL	18	0.0521739	AMPLIFICATION	1	0.00289855	DEEP DELETION	0	0	mRNA HIGH	17	0.0492754	mRNA LOW	0	0	FUSION	0	0	MISSENSE, INFRAME, TRUNCATING MUTATIONS (PUTATIVE DRIVER)	0	0
EGFR	ALL	28	0.0811594	AMPLIFICATION	4	0.0115942	DEEP DELETION	0	0	mRNA HIGH	21	0.0608696	mRNA LOW	0	0	FUSION	1	0.00289855	MISSENSE, INFRAME, TRUNCATING MUTATIONS (PUTATIVE DRIVER)	2	0.0057971
EGLN1	ALL	80	0.231884	AMPLIFICATION	21	0.0608696	DEEP DELETION	0	0	mRNA HIGH	54	0.156522	mRNA LOW	5	0.0144928	FUSION	0	0	MISSENSE, INFRAME, TRUNCATING MUTATIONS (PUTATIVE DRIVER)	0	0
EGLN2	ALL	28	0.0811594	AMPLIFICATION	3	0.00869565	DEEP DELETION	0	0	mRNA HIGH	25	0.0724638	mRNA LOW	0	0	FUSION	0	0	MISSENSE, INFRAME, TRUNCATING MUTATIONS (PUTATIVE DRIVER)	0	0
EGLN3	ALL	9	0.026087	AMPLIFICATION	0	0	DEEP DELETION	0	0	mRNA HIGH	9	0.026087	mRNA LOW	0	0	FUSION	0	0	MISSENSE, INFRAME, TRUNCATING MUTATIONS (PUTATIVE DRIVER)	0	0
EIF4E	ALL	31	0.0898551	AMPLIFICATION	0	0	DEEP DELETION	1	0.00289855	mRNA HIGH	12	0.0347826	mRNA LOW	18	0.0521739	FUSION	0	0	MISSENSE, INFRAME, TRUNCATING MUTATIONS (PUTATIVE DRIVER)	0	0
EIF4E1B	ALL	14	0.0405797	AMPLIFICATION	2	0.0057971	DEEP DELETION	0	0	mRNA HIGH	12	0.0347826	mRNA LOW	0	0	FUSION	0	0	MISSENSE, INFRAME, TRUNCATING MUTATIONS (PUTATIVE DRIVER)	0	0
EIF4E2	ALL	26	0.0753623	AMPLIFICATION	2	0.0057971	DEEP DELETION	0	0	mRNA HIGH	23	0.0666667	mRNA LOW	1	0.00289855	FUSION	0	0	MISSENSE, INFRAME, TRUNCATING MUTATIONS (PUTATIVE DRIVER)	0	0
EIF4EBP1	ALL	38	0.110145	AMPLIFICATION	4	0.0115942	DEEP DELETION	15	0.0434783	mRNA HIGH	18	0.0521739	mRNA LOW	0	0	FUSION	1	0.00289855	MISSENSE, INFRAME, TRUNCATING MUTATIONS (PUTATIVE DRIVER)	0	0
ELF2	ALL	20	0.057971	AMPLIFICATION	0	0	DEEP DELETION	1	0.00289855	mRNA HIGH	13	0.0376812	mRNA LOW	6	0.0173913	FUSION	0	0	MISSENSE, INFRAME, TRUNCATING MUTATIONS (PUTATIVE DRIVER)	0	0
ELOB	ALL	10	0.0289855	AMPLIFICATION	0	0	DEEP DELETION	1	0.00289855	mRNA HIGH	9	0.026087	mRNA LOW	0	0	FUSION	0	0	MISSENSE, INFRAME, TRUNCATING MUTATIONS (PUTATIVE DRIVER)	0	0
ELOC	ALL	133	0.385507	AMPLIFICATION	25	0.0724638	DEEP DELETION	0	0	mRNA HIGH	108	0.313043	mRNA LOW	0	0	FUSION	0	0	MISSENSE, INFRAME, TRUNCATING MUTATIONS (PUTATIVE DRIVER)	0	0
ENG	ALL	16	0.0463768	AMPLIFICATION	2	0.0057971	DEEP DELETION	0	0	mRNA HIGH	14	0.0405797	mRNA LOW	0	0	FUSION	0	0	MISSENSE, INFRAME, TRUNCATING MUTATIONS (PUTATIVE DRIVER)	0	0
ENO1	ALL	25	0.0724638	AMPLIFICATION	3	0.00869565	DEEP DELETION	6	0.0173913	mRNA HIGH	16	0.0463768	mRNA LOW	0	0	FUSION	0	0	MISSENSE, INFRAME, TRUNCATING MUTATIONS (PUTATIVE DRIVER)	0	0
ENO2	ALL	17	0.0492754	AMPLIFICATION	1	0.00289855	DEEP DELETION	1	0.00289855	mRNA HIGH	14	0.0405797	mRNA LOW	0	0	FUSION	1	0.00289855	MISSENSE, INFRAME, TRUNCATING MUTATIONS (PUTATIVE DRIVER)	0	0
ENO3	ALL	13	0.0376812	AMPLIFICATION	0	0	DEEP DELETION	7	0.0202899	mRNA HIGH	6	0.0173913	mRNA LOW	0	0	FUSION	0	0	MISSENSE, INFRAME, TRUNCATING MUTATIONS (PUTATIVE DRIVER)	0	0
ENO4	ALL	1	0.00289855	AMPLIFICATION	1	0.00289855	DEEP DELETION	0	0	mRNA HIGH	0	0	mRNA LOW	0	0	FUSION	0	0	MISSENSE, INFRAME, TRUNCATING MUTATIONS (PUTATIVE DRIVER)	0	0
EP300	ALL	17	0.0492754	AMPLIFICATION	1	0.00289855	DEEP DELETION	0	0	mRNA HIGH	16	0.0463768	mRNA LOW	0	0	FUSION	0	0	MISSENSE, INFRAME, TRUNCATING MUTATIONS (PUTATIVE DRIVER)	0	0
EPAS1	ALL	16	0.0463768	AMPLIFICATION	2	0.0057971	DEEP DELETION	1	0.00289855	mRNA HIGH	11	0.0318841	mRNA LOW	0	0	FUSION	2	0.0057971	MISSENSE, INFRAME, TRUNCATING MUTATIONS (PUTATIVE DRIVER)	0	0
EPO	ALL	17	0.0492754	AMPLIFICATION	2	0.0057971	DEEP DELETION	0	0	mRNA HIGH	15	0.0434783	mRNA LOW	0	0	FUSION	0	0	MISSENSE, INFRAME, TRUNCATING MUTATIONS (PUTATIVE DRIVER)	0	0
ERBB2	ALL	27	0.0782609	AMPLIFICATION	3	0.00869565	DEEP DELETION	1	0.00289855	mRNA HIGH	22	0.0637681	mRNA LOW	0	0	FUSION	1	0.00289855	MISSENSE, INFRAME, TRUNCATING MUTATIONS (PUTATIVE DRIVER)	0	0
ETS1	ALL	14	0.0405797	AMPLIFICATION	0	0	DEEP DELETION	0	0	mRNA HIGH	14	0.0405797	mRNA LOW	0	0	FUSION	0	0	MISSENSE, INFRAME, TRUNCATING MUTATIONS (PUTATIVE DRIVER)	0	0
FLT1	ALL	18	0.0521739	AMPLIFICATION	2	0.0057971	DEEP DELETION	1	0.00289855	mRNA HIGH	15	0.0434783	mRNA LOW	0	0	FUSION	0	0	MISSENSE, INFRAME, TRUNCATING MUTATIONS (PUTATIVE DRIVER)	0	0
GAPDH	ALL	16	0.0463768	AMPLIFICATION	1	0.00289855	DEEP DELETION	1	0.00289855	mRNA HIGH	14	0.0405797	mRNA LOW	0	0	FUSION	0	0	MISSENSE, INFRAME, TRUNCATING MUTATIONS (PUTATIVE DRIVER)	0	0
GATA6	ALL	15	0.0434783	AMPLIFICATION	3	0.00869565	DEEP DELETION	0	0	mRNA HIGH	11	0.0318841	mRNA LOW	0	0	FUSION	1	0.00289855	MISSENSE, INFRAME, TRUNCATING MUTATIONS (PUTATIVE DRIVER)	0	0
HBB	ALL	3	0.00869565	AMPLIFICATION	0	0	DEEP DELETION	0	0	mRNA HIGH	3	0.00869565	mRNA LOW	0	0	FUSION	0	0	MISSENSE, INFRAME, TRUNCATING MUTATIONS (PUTATIVE DRIVER)	0	0
HBG2	ALL	5	0.0144928	AMPLIFICATION	0	0	DEEP DELETION	0	0	mRNA HIGH	5	0.0144928	mRNA LOW	0	0	FUSION	0	0	MISSENSE, INFRAME, TRUNCATING MUTATIONS (PUTATIVE DRIVER)	0	0
HIF1A	ALL	13	0.0376812	AMPLIFICATION	0	0	DEEP DELETION	0	0	mRNA HIGH	13	0.0376812	mRNA LOW	0	0	FUSION	0	0	MISSENSE, INFRAME, TRUNCATING MUTATIONS (PUTATIVE DRIVER)	0	0
HIF3A	ALL	8	0.0231884	AMPLIFICATION	1	0.00289855	DEEP DELETION	0	0	mRNA HIGH	7	0.0202899	mRNA LOW	0	0	FUSION	0	0	MISSENSE, INFRAME, TRUNCATING MUTATIONS (PUTATIVE DRIVER)	0	0
HK1	ALL	18	0.0521739	AMPLIFICATION	2	0.0057971	DEEP DELETION	0	0	mRNA HIGH	16	0.0463768	mRNA LOW	0	0	FUSION	0	0	MISSENSE, INFRAME, TRUNCATING MUTATIONS (PUTATIVE DRIVER)	0	0
HK2	ALL	14	0.0405797	AMPLIFICATION	0	0	DEEP DELETION	0	0	mRNA HIGH	14	0.0405797	mRNA LOW	0	0	FUSION	0	0	MISSENSE, INFRAME, TRUNCATING MUTATIONS (PUTATIVE DRIVER)	0	0
HK3	ALL	15	0.0434783	AMPLIFICATION	2	0.0057971	DEEP DELETION	0	0	mRNA HIGH	13	0.0376812	mRNA LOW	0	0	FUSION	0	0	MISSENSE, INFRAME, TRUNCATING MUTATIONS (PUTATIVE DRIVER)	0	0
HKDC1	ALL	14	0.0405797	AMPLIFICATION	2	0.0057971	DEEP DELETION	0	0	mRNA HIGH	12	0.0347826	mRNA LOW	0	0	FUSION	0	0	MISSENSE, INFRAME, TRUNCATING MUTATIONS (PUTATIVE DRIVER)	0	0
HMBS	ALL	21	0.0608696	AMPLIFICATION	1	0.00289855	DEEP DELETION	0	0	mRNA HIGH	19	0.0550725	mRNA LOW	1	0.00289855	FUSION	0	0	MISSENSE, INFRAME, TRUNCATING MUTATIONS (PUTATIVE DRIVER)	0	0
HMOX1	ALL	2	0.0057971	AMPLIFICATION	1	0.00289855	DEEP DELETION	0	0	mRNA HIGH	1	0.00289855	mRNA LOW	0	0	FUSION	0	0	MISSENSE, INFRAME, TRUNCATING MUTATIONS (PUTATIVE DRIVER)	0	0
HMOX2	ALL	14	0.0405797	AMPLIFICATION	0	0	DEEP DELETION	3	0.00869565	mRNA HIGH	11	0.0318841	mRNA LOW	0	0	FUSION	0	0	MISSENSE, INFRAME, TRUNCATING MUTATIONS (PUTATIVE DRIVER)	0	0
HSP90B1	ALL	16	0.0463768	AMPLIFICATION	1	0.00289855	DEEP DELETION	0	0	mRNA HIGH	15	0.0434783	mRNA LOW	0	0	FUSION	0	0	MISSENSE, INFRAME, TRUNCATING MUTATIONS (PUTATIVE DRIVER)	0	0
HYOU1	ALL	16	0.0463768	AMPLIFICATION	1	0.00289855	DEEP DELETION	0	0	mRNA HIGH	15	0.0434783	mRNA LOW	0	0	FUSION	0	0	MISSENSE, INFRAME, TRUNCATING MUTATIONS (PUTATIVE DRIVER)	0	0
IFNG	ALL	18	0.0521739	AMPLIFICATION	2	0.0057971	DEEP DELETION	0	0	mRNA HIGH	16	0.0463768	mRNA LOW	0	0	FUSION	0	0	MISSENSE, INFRAME, TRUNCATING MUTATIONS (PUTATIVE DRIVER)	0	0
IFNGR1	ALL	15	0.0434783	AMPLIFICATION	0	0	DEEP DELETION	4	0.0115942	mRNA HIGH	11	0.0318841	mRNA LOW	0	0	FUSION	0	0	MISSENSE, INFRAME, TRUNCATING MUTATIONS (PUTATIVE DRIVER)	0	0
IFNGR2	ALL	17	0.0492754	AMPLIFICATION	0	0	DEEP DELETION	0	0	mRNA HIGH	17	0.0492754	mRNA LOW	0	0	FUSION	0	0	MISSENSE, INFRAME, TRUNCATING MUTATIONS (PUTATIVE DRIVER)	0	0
IGF1	ALL	15	0.0434783	AMPLIFICATION	0	0	DEEP DELETION	0	0	mRNA HIGH	15	0.0434783	mRNA LOW	0	0	FUSION	0	0	MISSENSE, INFRAME, TRUNCATING MUTATIONS (PUTATIVE DRIVER)	0	0
IGF1R	ALL	24	0.0695652	AMPLIFICATION	3	0.00869565	DEEP DELETION	2	0.0057971	mRNA HIGH	19	0.0550725	mRNA LOW	0	0	FUSION	0	0	MISSENSE, INFRAME, TRUNCATING MUTATIONS (PUTATIVE DRIVER)	0	0
IGFBP1	ALL	19	0.0550725	AMPLIFICATION	1	0.00289855	DEEP DELETION	0	0	mRNA HIGH	18	0.0521739	mRNA LOW	0	0	FUSION	0	0	MISSENSE, INFRAME, TRUNCATING MUTATIONS (PUTATIVE DRIVER)	0	0
IGFBP2	ALL	17	0.0492754	AMPLIFICATION	1	0.00289855	DEEP DELETION	0	0	mRNA HIGH	15	0.0434783	mRNA LOW	0	0	FUSION	1	0.00289855	MISSENSE, INFRAME, TRUNCATING MUTATIONS (PUTATIVE DRIVER)	0	0
IL1A	ALL	7	0.0202899	AMPLIFICATION	1	0.00289855	DEEP DELETION	0	0	mRNA HIGH	6	0.0173913	mRNA LOW	0	0	FUSION	0	0	MISSENSE, INFRAME, TRUNCATING MUTATIONS (PUTATIVE DRIVER)	0	0
IL1B	ALL	17	0.0492754	AMPLIFICATION	1	0.00289855	DEEP DELETION	0	0	mRNA HIGH	16	0.0463768	mRNA LOW	0	0	FUSION	0	0	MISSENSE, INFRAME, TRUNCATING MUTATIONS (PUTATIVE DRIVER)	0	0
IL6	ALL	9	0.026087	AMPLIFICATION	1	0.00289855	DEEP DELETION	0	0	mRNA HIGH	8	0.0231884	mRNA LOW	0	0	FUSION	0	0	MISSENSE, INFRAME, TRUNCATING MUTATIONS (PUTATIVE DRIVER)	0	0
IL6R	ALL	99	0.286957	AMPLIFICATION	37	0.107246	DEEP DELETION	0	0	mRNA HIGH	61	0.176812	mRNA LOW	0	0	FUSION	1	0.00289855	MISSENSE, INFRAME, TRUNCATING MUTATIONS (PUTATIVE DRIVER)	0	0
INS	ALL	16	0.0463768	AMPLIFICATION	1	0.00289855	DEEP DELETION	0	0	mRNA HIGH	15	0.0434783	mRNA LOW	0	0	FUSION	0	0	MISSENSE, INFRAME, TRUNCATING MUTATIONS (PUTATIVE DRIVER)	0	0
INSR	ALL	16	0.0463768	AMPLIFICATION	0	0	DEEP DELETION	1	0.00289855	mRNA HIGH	15	0.0434783	mRNA LOW	0	0	FUSION	0	0	MISSENSE, INFRAME, TRUNCATING MUTATIONS (PUTATIVE DRIVER)	0	0
ITPR1	ALL	14	0.0405797	AMPLIFICATION	2	0.0057971	DEEP DELETION	0	0	mRNA HIGH	12	0.0347826	mRNA LOW	0	0	FUSION	0	0	MISSENSE, INFRAME, TRUNCATING MUTATIONS (PUTATIVE DRIVER)	0	0
ITPR2	ALL	16	0.0463768	AMPLIFICATION	4	0.0115942	DEEP DELETION	0	0	mRNA HIGH	10	0.0289855	mRNA LOW	0	0	FUSION	2	0.0057971	MISSENSE, INFRAME, TRUNCATING MUTATIONS (PUTATIVE DRIVER)	0	0
KCNK3	ALL	26	0.0753623	AMPLIFICATION	5	0.0144928	DEEP DELETION	0	0	mRNA HIGH	21	0.0608696	mRNA LOW	0	0	FUSION	0	0	MISSENSE, INFRAME, TRUNCATING MUTATIONS (PUTATIVE DRIVER)	0	0
KCNMA1	ALL	17	0.0492754	AMPLIFICATION	3	0.00869565	DEEP DELETION	0	0	mRNA HIGH	13	0.0376812	mRNA LOW	0	0	FUSION	1	0.00289855	MISSENSE, INFRAME, TRUNCATING MUTATIONS (PUTATIVE DRIVER)	0	0
LDHA	ALL	21	0.0608696	AMPLIFICATION	2	0.0057971	DEEP DELETION	0	0	mRNA HIGH	19	0.0550725	mRNA LOW	0	0	FUSION	0	0	MISSENSE, INFRAME, TRUNCATING MUTATIONS (PUTATIVE DRIVER)	0	0
LDHAL6A	ALL	16	0.0463768	AMPLIFICATION	2	0.0057971	DEEP DELETION	0	0	mRNA HIGH	14	0.0405797	mRNA LOW	0	0	FUSION	0	0	MISSENSE, INFRAME, TRUNCATING MUTATIONS (PUTATIVE DRIVER)	0	0
LDHAL6B	ALL	9	0.026087	AMPLIFICATION	2	0.0057971	DEEP DELETION	0	0	mRNA HIGH	7	0.0202899	mRNA LOW	0	0	FUSION	0	0	MISSENSE, INFRAME, TRUNCATING MUTATIONS (PUTATIVE DRIVER)	0	0
LDHB	ALL	14	0.0405797	AMPLIFICATION	1	0.00289855	DEEP DELETION	0	0	mRNA HIGH	13	0.0376812	mRNA LOW	0	0	FUSION	0	0	MISSENSE, INFRAME, TRUNCATING MUTATIONS (PUTATIVE DRIVER)	0	0
LDHC	ALL	11	0.0318841	AMPLIFICATION	2	0.0057971	DEEP DELETION	0	0	mRNA HIGH	9	0.026087	mRNA LOW	0	0	FUSION	0	0	MISSENSE, INFRAME, TRUNCATING MUTATIONS (PUTATIVE DRIVER)	0	0
LMNA	ALL	83	0.24058	AMPLIFICATION	38	0.110145	DEEP DELETION	0	0	mRNA HIGH	45	0.130435	mRNA LOW	0	0	FUSION	0	0	MISSENSE, INFRAME, TRUNCATING MUTATIONS (PUTATIVE DRIVER)	0	0
LTBR	ALL	26	0.0753623	AMPLIFICATION	2	0.0057971	DEEP DELETION	1	0.00289855	mRNA HIGH	20	0.057971	mRNA LOW	3	0.00869565	FUSION	0	0	MISSENSE, INFRAME, TRUNCATING MUTATIONS (PUTATIVE DRIVER)	0	0
MAP2K1	ALL	18	0.0521739	AMPLIFICATION	1	0.00289855	DEEP DELETION	0	0	mRNA HIGH	15	0.0434783	mRNA LOW	1	0.00289855	FUSION	0	0	MISSENSE, INFRAME, TRUNCATING MUTATIONS (PUTATIVE DRIVER)	1	0.00289855
MAP2K2	ALL	31	0.0898551	AMPLIFICATION	4	0.0115942	DEEP DELETION	2	0.0057971	mRNA HIGH	24	0.0695652	mRNA LOW	0	0	FUSION	1	0.00289855	MISSENSE, INFRAME, TRUNCATING MUTATIONS (PUTATIVE DRIVER)	0	0
MAPK1	ALL	30	0.0869565	AMPLIFICATION	1	0.00289855	DEEP DELETION	1	0.00289855	mRNA HIGH	13	0.0376812	mRNA LOW	15	0.0434783	FUSION	0	0	MISSENSE, INFRAME, TRUNCATING MUTATIONS (PUTATIVE DRIVER)	0	0
MAPK3	ALL	24	0.0695652	AMPLIFICATION	1	0.00289855	DEEP DELETION	0	0	mRNA HIGH	22	0.0637681	mRNA LOW	1	0.00289855	FUSION	0	0	MISSENSE, INFRAME, TRUNCATING MUTATIONS (PUTATIVE DRIVER)	0	0
MDM2	ALL	29	0.084058	AMPLIFICATION	4	0.0115942	DEEP DELETION	0	0	mRNA HIGH	25	0.0724638	mRNA LOW	0	0	FUSION	0	0	MISSENSE, INFRAME, TRUNCATING MUTATIONS (PUTATIVE DRIVER)	0	0
MDM4	ALL	92	0.266667	AMPLIFICATION	20	0.057971	DEEP DELETION	0	0	mRNA HIGH	72	0.208696	mRNA LOW	0	0	FUSION	0	0	MISSENSE, INFRAME, TRUNCATING MUTATIONS (PUTATIVE DRIVER)	0	0
MKNK1	ALL	19	0.0550725	AMPLIFICATION	0	0	DEEP DELETION	0	0	mRNA HIGH	17	0.0492754	mRNA LOW	2	0.0057971	FUSION	0	0	MISSENSE, INFRAME, TRUNCATING MUTATIONS (PUTATIVE DRIVER)	0	0
MKNK2	ALL	19	0.0550725	AMPLIFICATION	1	0.00289855	DEEP DELETION	2	0.0057971	mRNA HIGH	15	0.0434783	mRNA LOW	1	0.00289855	FUSION	0	0	MISSENSE, INFRAME, TRUNCATING MUTATIONS (PUTATIVE DRIVER)	0	0
MMP14	ALL	10	0.0289855	AMPLIFICATION	0	0	DEEP DELETION	0	0	mRNA HIGH	10	0.0289855	mRNA LOW	0	0	FUSION	0	0	MISSENSE, INFRAME, TRUNCATING MUTATIONS (PUTATIVE DRIVER)	0	0
MMP2	ALL	6	0.0173913	AMPLIFICATION	0	0	DEEP DELETION	1	0.00289855	mRNA HIGH	5	0.0144928	mRNA LOW	0	0	FUSION	0	0	MISSENSE, INFRAME, TRUNCATING MUTATIONS (PUTATIVE DRIVER)	0	0
MMP3	ALL	7	0.0202899	AMPLIFICATION	2	0.0057971	DEEP DELETION	0	0	mRNA HIGH	5	0.0144928	mRNA LOW	0	0	FUSION	0	0	MISSENSE, INFRAME, TRUNCATING MUTATIONS (PUTATIVE DRIVER)	0	0
MT3	ALL	9	0.026087	AMPLIFICATION	0	0	DEEP DELETION	1	0.00289855	mRNA HIGH	8	0.0231884	mRNA LOW	0	0	FUSION	0	0	MISSENSE, INFRAME, TRUNCATING MUTATIONS (PUTATIVE DRIVER)	0	0
MTOR	ALL	11	0.0318841	AMPLIFICATION	3	0.00869565	DEEP DELETION	2	0.0057971	mRNA HIGH	5	0.0144928	mRNA LOW	0	0	FUSION	0	0	MISSENSE, INFRAME, TRUNCATING MUTATIONS (PUTATIVE DRIVER)	1	0.00289855
NDRG1	ALL	70	0.202899	AMPLIFICATION	37	0.107246	DEEP DELETION	1	0.00289855	mRNA HIGH	32	0.0927536	mRNA LOW	0	0	FUSION	0	0	MISSENSE, INFRAME, TRUNCATING MUTATIONS (PUTATIVE DRIVER)	0	0
NFKB1	ALL	18	0.0521739	AMPLIFICATION	0	0	DEEP DELETION	2	0.0057971	mRNA HIGH	9	0.026087	mRNA LOW	7	0.0202899	FUSION	0	0	MISSENSE, INFRAME, TRUNCATING MUTATIONS (PUTATIVE DRIVER)	0	0
NOS1	ALL	5	0.0144928	AMPLIFICATION	1	0.00289855	DEEP DELETION	0	0	mRNA HIGH	4	0.0115942	mRNA LOW	0	0	FUSION	0	0	MISSENSE, INFRAME, TRUNCATING MUTATIONS (PUTATIVE DRIVER)	0	0
NOS2	ALL	9	0.026087	AMPLIFICATION	3	0.00869565	DEEP DELETION	0	0	mRNA HIGH	6	0.0173913	mRNA LOW	0	0	FUSION	0	0	MISSENSE, INFRAME, TRUNCATING MUTATIONS (PUTATIVE DRIVER)	0	0
NOS3	ALL	17	0.0492754	AMPLIFICATION	3	0.00869565	DEEP DELETION	1	0.00289855	mRNA HIGH	13	0.0376812	mRNA LOW	0	0	FUSION	0	0	MISSENSE, INFRAME, TRUNCATING MUTATIONS (PUTATIVE DRIVER)	0	0
NOTCH1	ALL	26	0.0753623	AMPLIFICATION	3	0.00869565	DEEP DELETION	2	0.0057971	mRNA HIGH	21	0.0608696	mRNA LOW	0	0	FUSION	0	0	MISSENSE, INFRAME, TRUNCATING MUTATIONS (PUTATIVE DRIVER)	0	0
NPEPPS	ALL	30	0.0869565	AMPLIFICATION	3	0.00869565	DEEP DELETION	0	0	mRNA HIGH	27	0.0782609	mRNA LOW	0	0	FUSION	0	0	MISSENSE, INFRAME, TRUNCATING MUTATIONS (PUTATIVE DRIVER)	0	0
NPPA	ALL	14	0.0405797	AMPLIFICATION	2	0.0057971	DEEP DELETION	2	0.0057971	mRNA HIGH	10	0.0289855	mRNA LOW	0	0	FUSION	0	0	MISSENSE, INFRAME, TRUNCATING MUTATIONS (PUTATIVE DRIVER)	0	0
NPPB	ALL	19	0.0550725	AMPLIFICATION	2	0.0057971	DEEP DELETION	2	0.0057971	mRNA HIGH	15	0.0434783	mRNA LOW	0	0	FUSION	0	0	MISSENSE, INFRAME, TRUNCATING MUTATIONS (PUTATIVE DRIVER)	0	0
NR4A2	ALL	14	0.0405797	AMPLIFICATION	2	0.0057971	DEEP DELETION	3	0.00869565	mRNA HIGH	9	0.026087	mRNA LOW	0	0	FUSION	0	0	MISSENSE, INFRAME, TRUNCATING MUTATIONS (PUTATIVE DRIVER)	0	0
NRP1	ALL	23	0.0666667	AMPLIFICATION	5	0.0144928	DEEP DELETION	0	0	mRNA HIGH	18	0.0521739	mRNA LOW	0	0	FUSION	0	0	MISSENSE, INFRAME, TRUNCATING MUTATIONS (PUTATIVE DRIVER)	0	0
NRP2	ALL	7	0.0202899	AMPLIFICATION	1	0.00289855	DEEP DELETION	0	0	mRNA HIGH	5	0.0144928	mRNA LOW	0	0	FUSION	1	0.00289855	MISSENSE, INFRAME, TRUNCATING MUTATIONS (PUTATIVE DRIVER)	0	0
OS9	ALL	29	0.084058	AMPLIFICATION	4	0.0115942	DEEP DELETION	0	0	mRNA HIGH	22	0.0637681	mRNA LOW	3	0.00869565	FUSION	0	0	MISSENSE, INFRAME, TRUNCATING MUTATIONS (PUTATIVE DRIVER)	0	0
PAM	ALL	22	0.0637681	AMPLIFICATION	0	0	DEEP DELETION	1	0.00289855	mRNA HIGH	21	0.0608696	mRNA LOW	0	0	FUSION	0	0	MISSENSE, INFRAME, TRUNCATING MUTATIONS (PUTATIVE DRIVER)	0	0
PDE5A	ALL	6	0.0173913	AMPLIFICATION	0	0	DEEP DELETION	1	0.00289855	mRNA HIGH	5	0.0144928	mRNA LOW	0	0	FUSION	0	0	MISSENSE, INFRAME, TRUNCATING MUTATIONS (PUTATIVE DRIVER)	0	0
PDGFB	ALL	9	0.026087	AMPLIFICATION	2	0.0057971	DEEP DELETION	1	0.00289855	mRNA HIGH	6	0.0173913	mRNA LOW	0	0	FUSION	0	0	MISSENSE, INFRAME, TRUNCATING MUTATIONS (PUTATIVE DRIVER)	0	0
PDHA1	ALL	23	0.0666667	AMPLIFICATION	1	0.00289855	DEEP DELETION	5	0.0144928	mRNA HIGH	17	0.0492754	mRNA LOW	0	0	FUSION	0	0	MISSENSE, INFRAME, TRUNCATING MUTATIONS (PUTATIVE DRIVER)	0	0
PDHA2	ALL	12	0.0347826	AMPLIFICATION	0	0	DEEP DELETION	1	0.00289855	mRNA HIGH	11	0.0318841	mRNA LOW	0	0	FUSION	0	0	MISSENSE, INFRAME, TRUNCATING MUTATIONS (PUTATIVE DRIVER)	0	0
PDHB	ALL	16	0.0463768	AMPLIFICATION	2	0.0057971	DEEP DELETION	0	0	mRNA HIGH	11	0.0318841	mRNA LOW	2	0.0057971	FUSION	1	0.00289855	MISSENSE, INFRAME, TRUNCATING MUTATIONS (PUTATIVE DRIVER)	0	0
PDIA2	ALL	8	0.0231884	AMPLIFICATION	0	0	DEEP DELETION	3	0.00869565	mRNA HIGH	5	0.0144928	mRNA LOW	0	0	FUSION	0	0	MISSENSE, INFRAME, TRUNCATING MUTATIONS (PUTATIVE DRIVER)	0	0
PDK1	ALL	19	0.0550725	AMPLIFICATION	2	0.0057971	DEEP DELETION	2	0.0057971	mRNA HIGH	15	0.0434783	mRNA LOW	0	0	FUSION	0	0	MISSENSE, INFRAME, TRUNCATING MUTATIONS (PUTATIVE DRIVER)	0	0
PFKFB3	ALL	31	0.0898551	AMPLIFICATION	5	0.0144928	DEEP DELETION	2	0.0057971	mRNA HIGH	24	0.0695652	mRNA LOW	0	0	FUSION	0	0	MISSENSE, INFRAME, TRUNCATING MUTATIONS (PUTATIVE DRIVER)	0	0
PFKL	ALL	31	0.0898551	AMPLIFICATION	1	0.00289855	DEEP DELETION	1	0.00289855	mRNA HIGH	19	0.0550725	mRNA LOW	10	0.0289855	FUSION	0	0	MISSENSE, INFRAME, TRUNCATING MUTATIONS (PUTATIVE DRIVER)	0	0
PFKM	ALL	14	0.0405797	AMPLIFICATION	0	0	DEEP DELETION	0	0	mRNA HIGH	14	0.0405797	mRNA LOW	0	0	FUSION	0	0	MISSENSE, INFRAME, TRUNCATING MUTATIONS (PUTATIVE DRIVER)	0	0
PFKP	ALL	21	0.0608696	AMPLIFICATION	3	0.00869565	DEEP DELETION	2	0.0057971	mRNA HIGH	16	0.0463768	mRNA LOW	0	0	FUSION	0	0	MISSENSE, INFRAME, TRUNCATING MUTATIONS (PUTATIVE DRIVER)	0	0
PGF	ALL	3	0.00869565	AMPLIFICATION	0	0	DEEP DELETION	2	0.0057971	mRNA HIGH	1	0.00289855	mRNA LOW	0	0	FUSION	0	0	MISSENSE, INFRAME, TRUNCATING MUTATIONS (PUTATIVE DRIVER)	0	0
PGK1	ALL	21	0.0608696	AMPLIFICATION	1	0.00289855	DEEP DELETION	0	0	mRNA HIGH	20	0.057971	mRNA LOW	0	0	FUSION	0	0	MISSENSE, INFRAME, TRUNCATING MUTATIONS (PUTATIVE DRIVER)	0	0
PGK2	ALL	14	0.0405797	AMPLIFICATION	5	0.0144928	DEEP DELETION	0	0	mRNA HIGH	9	0.026087	mRNA LOW	0	0	FUSION	0	0	MISSENSE, INFRAME, TRUNCATING MUTATIONS (PUTATIVE DRIVER)	0	0
PIK3CA	ALL	32	0.0927536	AMPLIFICATION	4	0.0115942	DEEP DELETION	0	0	mRNA HIGH	20	0.057971	mRNA LOW	2	0.0057971	FUSION	0	0	MISSENSE, INFRAME, TRUNCATING MUTATIONS (PUTATIVE DRIVER)	6	0.0173913
PIK3CB	ALL	26	0.0753623	AMPLIFICATION	1	0.00289855	DEEP DELETION	0	0	mRNA HIGH	24	0.0695652	mRNA LOW	0	0	FUSION	0	0	MISSENSE, INFRAME, TRUNCATING MUTATIONS (PUTATIVE DRIVER)	1	0.00289855
PIK3CD	ALL	15	0.0434783	AMPLIFICATION	2	0.0057971	DEEP DELETION	4	0.0115942	mRNA HIGH	9	0.026087	mRNA LOW	0	0	FUSION	0	0	MISSENSE, INFRAME, TRUNCATING MUTATIONS (PUTATIVE DRIVER)	0	0
PIK3CG	ALL	19	0.0550725	AMPLIFICATION	4	0.0115942	DEEP DELETION	0	0	mRNA HIGH	15	0.0434783	mRNA LOW	0	0	FUSION	0	0	MISSENSE, INFRAME, TRUNCATING MUTATIONS (PUTATIVE DRIVER)	0	0
PIK3R1	ALL	17	0.0492754	AMPLIFICATION	1	0.00289855	DEEP DELETION	1	0.00289855	mRNA HIGH	12	0.0347826	mRNA LOW	0	0	FUSION	0	0	MISSENSE, INFRAME, TRUNCATING MUTATIONS (PUTATIVE DRIVER)	3	0.00869565
PIK3R2	ALL	33	0.0956522	AMPLIFICATION	7	0.0202899	DEEP DELETION	1	0.00289855	mRNA HIGH	24	0.0695652	mRNA LOW	0	0	FUSION	0	0	MISSENSE, INFRAME, TRUNCATING MUTATIONS (PUTATIVE DRIVER)	1	0.00289855
PIK3R3	ALL	9	0.026087	AMPLIFICATION	1	0.00289855	DEEP DELETION	0	0	mRNA HIGH	8	0.0231884	mRNA LOW	0	0	FUSION	0	0	MISSENSE, INFRAME, TRUNCATING MUTATIONS (PUTATIVE DRIVER)	0	0
PKLR	ALL	80	0.231884	AMPLIFICATION	38	0.110145	DEEP DELETION	0	0	mRNA HIGH	42	0.121739	mRNA LOW	0	0	FUSION	0	0	MISSENSE, INFRAME, TRUNCATING MUTATIONS (PUTATIVE DRIVER)	0	0
PLCG1	ALL	26	0.0753623	AMPLIFICATION	1	0.00289855	DEEP DELETION	0	0	mRNA HIGH	25	0.0724638	mRNA LOW	0	0	FUSION	0	0	MISSENSE, INFRAME, TRUNCATING MUTATIONS (PUTATIVE DRIVER)	0	0
PLCG2	ALL	5	0.0144928	AMPLIFICATION	0	0	DEEP DELETION	0	0	mRNA HIGH	5	0.0144928	mRNA LOW	0	0	FUSION	0	0	MISSENSE, INFRAME, TRUNCATING MUTATIONS (PUTATIVE DRIVER)	0	0
PLOD1	ALL	20	0.057971	AMPLIFICATION	2	0.0057971	DEEP DELETION	1	0.00289855	mRNA HIGH	17	0.0492754	mRNA LOW	0	0	FUSION	0	0	MISSENSE, INFRAME, TRUNCATING MUTATIONS (PUTATIVE DRIVER)	0	0
PLOD2	ALL	18	0.0521739	AMPLIFICATION	1	0.00289855	DEEP DELETION	0	0	mRNA HIGH	17	0.0492754	mRNA LOW	0	0	FUSION	0	0	MISSENSE, INFRAME, TRUNCATING MUTATIONS (PUTATIVE DRIVER)	0	0
PMAIP1	ALL	5	0.0144928	AMPLIFICATION	0	0	DEEP DELETION	0	0	mRNA HIGH	5	0.0144928	mRNA LOW	0	0	FUSION	0	0	MISSENSE, INFRAME, TRUNCATING MUTATIONS (PUTATIVE DRIVER)	0	0
PML	ALL	18	0.0521739	AMPLIFICATION	0	0	DEEP DELETION	0	0	mRNA HIGH	18	0.0521739	mRNA LOW	0	0	FUSION	0	0	MISSENSE, INFRAME, TRUNCATING MUTATIONS (PUTATIVE DRIVER)	0	0
POLR2A	ALL	16	0.0463768	AMPLIFICATION	0	0	DEEP DELETION	8	0.0231884	mRNA HIGH	7	0.0202899	mRNA LOW	1	0.00289855	FUSION	0	0	MISSENSE, INFRAME, TRUNCATING MUTATIONS (PUTATIVE DRIVER)	0	0
PPARA	ALL	19	0.0550725	AMPLIFICATION	1	0.00289855	DEEP DELETION	1	0.00289855	mRNA HIGH	16	0.0463768	mRNA LOW	0	0	FUSION	1	0.00289855	MISSENSE, INFRAME, TRUNCATING MUTATIONS (PUTATIVE DRIVER)	0	0
PRKAA1	ALL	28	0.0811594	AMPLIFICATION	3	0.00869565	DEEP DELETION	0	0	mRNA HIGH	25	0.0724638	mRNA LOW	0	0	FUSION	0	0	MISSENSE, INFRAME, TRUNCATING MUTATIONS (PUTATIVE DRIVER)	0	0
PRKAA2	ALL	23	0.0666667	AMPLIFICATION	4	0.0115942	DEEP DELETION	0	0	mRNA HIGH	19	0.0550725	mRNA LOW	0	0	FUSION	0	0	MISSENSE, INFRAME, TRUNCATING MUTATIONS (PUTATIVE DRIVER)	0	0
PRKCA	ALL	45	0.130435	AMPLIFICATION	13	0.0376812	DEEP DELETION	0	0	mRNA HIGH	27	0.0782609	mRNA LOW	0	0	FUSION	5	0.0144928	MISSENSE, INFRAME, TRUNCATING MUTATIONS (PUTATIVE DRIVER)	0	0
PRKCB	ALL	20	0.057971	AMPLIFICATION	1	0.00289855	DEEP DELETION	0	0	mRNA HIGH	19	0.0550725	mRNA LOW	0	0	FUSION	0	0	MISSENSE, INFRAME, TRUNCATING MUTATIONS (PUTATIVE DRIVER)	0	0
PRKCG	ALL	11	0.0318841	AMPLIFICATION	1	0.00289855	DEEP DELETION	0	0	mRNA HIGH	10	0.0289855	mRNA LOW	0	0	FUSION	0	0	MISSENSE, INFRAME, TRUNCATING MUTATIONS (PUTATIVE DRIVER)	0	0
PSEN2	ALL	78	0.226087	AMPLIFICATION	19	0.0550725	DEEP DELETION	0	0	mRNA HIGH	59	0.171014	mRNA LOW	0	0	FUSION	0	0	MISSENSE, INFRAME, TRUNCATING MUTATIONS (PUTATIVE DRIVER)	0	0
PSMC3	ALL	25	0.0724638	AMPLIFICATION	0	0	DEEP DELETION	0	0	mRNA HIGH	24	0.0695652	mRNA LOW	1	0.00289855	FUSION	0	0	MISSENSE, INFRAME, TRUNCATING MUTATIONS (PUTATIVE DRIVER)	0	0
RBX1	ALL	24	0.0695652	AMPLIFICATION	1	0.00289855	DEEP DELETION	0	0	mRNA HIGH	23	0.0666667	mRNA LOW	0	0	FUSION	0	0	MISSENSE, INFRAME, TRUNCATING MUTATIONS (PUTATIVE DRIVER)	0	0
RELA	ALL	29	0.084058	AMPLIFICATION	2	0.0057971	DEEP DELETION	2	0.0057971	mRNA HIGH	14	0.0405797	mRNA LOW	11	0.0318841	FUSION	0	0	MISSENSE, INFRAME, TRUNCATING MUTATIONS (PUTATIVE DRIVER)	0	0
RPS6	ALL	19	0.0550725	AMPLIFICATION	0	0	DEEP DELETION	0	0	mRNA HIGH	19	0.0550725	mRNA LOW	0	0	FUSION	0	0	MISSENSE, INFRAME, TRUNCATING MUTATIONS (PUTATIVE DRIVER)	0	0
RPS6KB1	ALL	61	0.176812	AMPLIFICATION	17	0.0492754	DEEP DELETION	0	0	mRNA HIGH	41	0.118841	mRNA LOW	2	0.0057971	FUSION	1	0.00289855	MISSENSE, INFRAME, TRUNCATING MUTATIONS (PUTATIVE DRIVER)	0	0
RPS6KB2	ALL	38	0.110145	AMPLIFICATION	9	0.026087	DEEP DELETION	0	0	mRNA HIGH	28	0.0811594	mRNA LOW	1	0.00289855	FUSION	0	0	MISSENSE, INFRAME, TRUNCATING MUTATIONS (PUTATIVE DRIVER)	0	0
RYR1	ALL	19	0.0550725	AMPLIFICATION	2	0.0057971	DEEP DELETION	0	0	mRNA HIGH	16	0.0463768	mRNA LOW	0	0	FUSION	1	0.00289855	MISSENSE, INFRAME, TRUNCATING MUTATIONS (PUTATIVE DRIVER)	0	0
SATB1	ALL	13	0.0376812	AMPLIFICATION	0	0	DEEP DELETION	0	0	mRNA HIGH	13	0.0376812	mRNA LOW	0	0	FUSION	0	0	MISSENSE, INFRAME, TRUNCATING MUTATIONS (PUTATIVE DRIVER)	0	0
SCNN1B	ALL	1	0.00289855	AMPLIFICATION	0	0	DEEP DELETION	0	0	mRNA HIGH	1	0.00289855	mRNA LOW	0	0	FUSION	0	0	MISSENSE, INFRAME, TRUNCATING MUTATIONS (PUTATIVE DRIVER)	0	0
SERPINE1	ALL	15	0.0434783	AMPLIFICATION	2	0.0057971	DEEP DELETION	0	0	mRNA HIGH	13	0.0376812	mRNA LOW	0	0	FUSION	0	0	MISSENSE, INFRAME, TRUNCATING MUTATIONS (PUTATIVE DRIVER)	0	0
SFRP1	ALL	29	0.084058	AMPLIFICATION	5	0.0144928	DEEP DELETION	14	0.0405797	mRNA HIGH	10	0.0289855	mRNA LOW	0	0	FUSION	0	0	MISSENSE, INFRAME, TRUNCATING MUTATIONS (PUTATIVE DRIVER)	0	0
SHC1	ALL	69	0.2	AMPLIFICATION	38	0.110145	DEEP DELETION	0	0	mRNA HIGH	30	0.0869565	mRNA LOW	0	0	FUSION	1	0.00289855	MISSENSE, INFRAME, TRUNCATING MUTATIONS (PUTATIVE DRIVER)	0	0
SLC29A1	ALL	54	0.156522	AMPLIFICATION	11	0.0318841	DEEP DELETION	0	0	mRNA HIGH	42	0.121739	mRNA LOW	0	0	FUSION	1	0.00289855	MISSENSE, INFRAME, TRUNCATING MUTATIONS (PUTATIVE DRIVER)	0	0
SLC2A1	ALL	12	0.0347826	AMPLIFICATION	2	0.0057971	DEEP DELETION	0	0	mRNA HIGH	10	0.0289855	mRNA LOW	0	0	FUSION	0	0	MISSENSE, INFRAME, TRUNCATING MUTATIONS (PUTATIVE DRIVER)	0	0
SLC8A1	ALL	24	0.0695652	AMPLIFICATION	2	0.0057971	DEEP DELETION	1	0.00289855	mRNA HIGH	19	0.0550725	mRNA LOW	0	0	FUSION	2	0.0057971	MISSENSE, INFRAME, TRUNCATING MUTATIONS (PUTATIVE DRIVER)	0	0
SMAD3	ALL	23	0.0666667	AMPLIFICATION	1	0.00289855	DEEP DELETION	2	0.0057971	mRNA HIGH	20	0.057971	mRNA LOW	0	0	FUSION	0	0	MISSENSE, INFRAME, TRUNCATING MUTATIONS (PUTATIVE DRIVER)	0	0
SMAD4	ALL	26	0.0753623	AMPLIFICATION	0	0	DEEP DELETION	1	0.00289855	mRNA HIGH	7	0.0202899	mRNA LOW	15	0.0434783	FUSION	0	0	MISSENSE, INFRAME, TRUNCATING MUTATIONS (PUTATIVE DRIVER)	3	0.00869565
SNAI3	ALL	24	0.0695652	AMPLIFICATION	0	0	DEEP DELETION	2	0.0057971	mRNA HIGH	22	0.0637681	mRNA LOW	0	0	FUSION	0	0	MISSENSE, INFRAME, TRUNCATING MUTATIONS (PUTATIVE DRIVER)	0	0
SOD2	ALL	18	0.0521739	AMPLIFICATION	1	0.00289855	DEEP DELETION	5	0.0144928	mRNA HIGH	12	0.0347826	mRNA LOW	0	0	FUSION	0	0	MISSENSE, INFRAME, TRUNCATING MUTATIONS (PUTATIVE DRIVER)	0	0
SOD3	ALL	3	0.00869565	AMPLIFICATION	0	0	DEEP DELETION	0	0	mRNA HIGH	3	0.00869565	mRNA LOW	0	0	FUSION	0	0	MISSENSE, INFRAME, TRUNCATING MUTATIONS (PUTATIVE DRIVER)	0	0
SPRY2	ALL	17	0.0492754	AMPLIFICATION	3	0.00869565	DEEP DELETION	2	0.0057971	mRNA HIGH	12	0.0347826	mRNA LOW	0	0	FUSION	0	0	MISSENSE, INFRAME, TRUNCATING MUTATIONS (PUTATIVE DRIVER)	0	0
STAT3	ALL	25	0.0724638	AMPLIFICATION	3	0.00869565	DEEP DELETION	1	0.00289855	mRNA HIGH	17	0.0492754	mRNA LOW	0	0	FUSION	1	0.00289855	MISSENSE, INFRAME, TRUNCATING MUTATIONS (PUTATIVE DRIVER)	3	0.00869565
STAT5B	ALL	46	0.133333	AMPLIFICATION	3	0.00869565	DEEP DELETION	1	0.00289855	mRNA HIGH	34	0.0985507	mRNA LOW	8	0.0231884	FUSION	0	0	MISSENSE, INFRAME, TRUNCATING MUTATIONS (PUTATIVE DRIVER)	0	0
STC1	ALL	32	0.0927536	AMPLIFICATION	0	0	DEEP DELETION	20	0.057971	mRNA HIGH	12	0.0347826	mRNA LOW	0	0	FUSION	0	0	MISSENSE, INFRAME, TRUNCATING MUTATIONS (PUTATIVE DRIVER)	0	0
STC2	ALL	15	0.0434783	AMPLIFICATION	1	0.00289855	DEEP DELETION	0	0	mRNA HIGH	14	0.0405797	mRNA LOW	0	0	FUSION	0	0	MISSENSE, INFRAME, TRUNCATING MUTATIONS (PUTATIVE DRIVER)	0	0
TEK	ALL	10	0.0289855	AMPLIFICATION	0	0	DEEP DELETION	0	0	mRNA HIGH	10	0.0289855	mRNA LOW	0	0	FUSION	0	0	MISSENSE, INFRAME, TRUNCATING MUTATIONS (PUTATIVE DRIVER)	0	0
TF	ALL	27	0.0782609	AMPLIFICATION	3	0.00869565	DEEP DELETION	0	0	mRNA HIGH	20	0.057971	mRNA LOW	0	0	FUSION	4	0.0115942	MISSENSE, INFRAME, TRUNCATING MUTATIONS (PUTATIVE DRIVER)	0	0
TFRC	ALL	26	0.0753623	AMPLIFICATION	5	0.0144928	DEEP DELETION	0	0	mRNA HIGH	20	0.057971	mRNA LOW	0	0	FUSION	1	0.00289855	MISSENSE, INFRAME, TRUNCATING MUTATIONS (PUTATIVE DRIVER)	0	0
TGFA	ALL	14	0.0405797	AMPLIFICATION	0	0	DEEP DELETION	1	0.00289855	mRNA HIGH	13	0.0376812	mRNA LOW	0	0	FUSION	0	0	MISSENSE, INFRAME, TRUNCATING MUTATIONS (PUTATIVE DRIVER)	0	0
TGFB1	ALL	23	0.0666667	AMPLIFICATION	1	0.00289855	DEEP DELETION	0	0	mRNA HIGH	22	0.0637681	mRNA LOW	0	0	FUSION	0	0	MISSENSE, INFRAME, TRUNCATING MUTATIONS (PUTATIVE DRIVER)	0	0
TGFB2	ALL	33	0.0956522	AMPLIFICATION	19	0.0550725	DEEP DELETION	0	0	mRNA HIGH	14	0.0405797	mRNA LOW	0	0	FUSION	0	0	MISSENSE, INFRAME, TRUNCATING MUTATIONS (PUTATIVE DRIVER)	0	0
TGFB3	ALL	15	0.0434783	AMPLIFICATION	0	0	DEEP DELETION	2	0.0057971	mRNA HIGH	13	0.0376812	mRNA LOW	0	0	FUSION	0	0	MISSENSE, INFRAME, TRUNCATING MUTATIONS (PUTATIVE DRIVER)	0	0
TGFBR1	ALL	12	0.0347826	AMPLIFICATION	0	0	DEEP DELETION	2	0.0057971	mRNA HIGH	9	0.026087	mRNA LOW	0	0	FUSION	1	0.00289855	MISSENSE, INFRAME, TRUNCATING MUTATIONS (PUTATIVE DRIVER)	0	0
TH	ALL	7	0.0202899	AMPLIFICATION	1	0.00289855	DEEP DELETION	0	0	mRNA HIGH	6	0.0173913	mRNA LOW	0	0	FUSION	0	0	MISSENSE, INFRAME, TRUNCATING MUTATIONS (PUTATIVE DRIVER)	0	0
THBS1	ALL	14	0.0405797	AMPLIFICATION	0	0	DEEP DELETION	2	0.0057971	mRNA HIGH	12	0.0347826	mRNA LOW	0	0	FUSION	0	0	MISSENSE, INFRAME, TRUNCATING MUTATIONS (PUTATIVE DRIVER)	0	0
TIMP1	ALL	21	0.0608696	AMPLIFICATION	2	0.0057971	DEEP DELETION	4	0.0115942	mRNA HIGH	15	0.0434783	mRNA LOW	0	0	FUSION	0	0	MISSENSE, INFRAME, TRUNCATING MUTATIONS (PUTATIVE DRIVER)	0	0
TLR4	ALL	16	0.0463768	AMPLIFICATION	1	0.00289855	DEEP DELETION	0	0	mRNA HIGH	15	0.0434783	mRNA LOW	0	0	FUSION	0	0	MISSENSE, INFRAME, TRUNCATING MUTATIONS (PUTATIVE DRIVER)	0	0
TNC	ALL	8	0.0231884	AMPLIFICATION	2	0.0057971	DEEP DELETION	0	0	mRNA HIGH	6	0.0173913	mRNA LOW	0	0	FUSION	0	0	MISSENSE, INFRAME, TRUNCATING MUTATIONS (PUTATIVE DRIVER)	0	0
TNF	ALL	21	0.0608696	AMPLIFICATION	7	0.0202899	DEEP DELETION	0	0	mRNA HIGH	14	0.0405797	mRNA LOW	0	0	FUSION	0	0	MISSENSE, INFRAME, TRUNCATING MUTATIONS (PUTATIVE DRIVER)	0	0
TP53	ALL	145	0.42029	AMPLIFICATION	0	0	DEEP DELETION	8	0.0231884	mRNA HIGH	12	0.0347826	mRNA LOW	18	0.0521739	FUSION	0	0	MISSENSE, INFRAME, TRUNCATING MUTATIONS (PUTATIVE DRIVER)	107	0.310145
TSC2	ALL	51	0.147826	AMPLIFICATION	3	0.00869565	DEEP DELETION	3	0.00869565	mRNA HIGH	17	0.0492754	mRNA LOW	17	0.0492754	FUSION	0	0	MISSENSE, INFRAME, TRUNCATING MUTATIONS (PUTATIVE DRIVER)	11	0.0318841
UBE2B	ALL	55	0.15942	AMPLIFICATION	2	0.0057971	DEEP DELETION	1	0.00289855	mRNA HIGH	43	0.124638	mRNA LOW	8	0.0231884	FUSION	1	0.00289855	MISSENSE, INFRAME, TRUNCATING MUTATIONS (PUTATIVE DRIVER)	0	0
UCP2	ALL	21	0.0608696	AMPLIFICATION	1	0.00289855	DEEP DELETION	1	0.00289855	mRNA HIGH	19	0.0550725	mRNA LOW	0	0	FUSION	0	0	MISSENSE, INFRAME, TRUNCATING MUTATIONS (PUTATIVE DRIVER)	0	0
USF1	ALL	104	0.301449	AMPLIFICATION	34	0.0985507	DEEP DELETION	0	0	mRNA HIGH	70	0.202899	mRNA LOW	0	0	FUSION	0	0	MISSENSE, INFRAME, TRUNCATING MUTATIONS (PUTATIVE DRIVER)	0	0
VCAM1	ALL	21	0.0608696	AMPLIFICATION	4	0.0115942	DEEP DELETION	0	0	mRNA HIGH	17	0.0492754	mRNA LOW	0	0	FUSION	0	0	MISSENSE, INFRAME, TRUNCATING MUTATIONS (PUTATIVE DRIVER)	0	0
VEGFA	ALL	46	0.133333	AMPLIFICATION	22	0.0637681	DEEP DELETION	0	0	mRNA HIGH	24	0.0695652	mRNA LOW	0	0	FUSION	0	0	MISSENSE, INFRAME, TRUNCATING MUTATIONS (PUTATIVE DRIVER)	0	0
VEGFC	ALL	17	0.0492754	AMPLIFICATION	1	0.00289855	DEEP DELETION	7	0.0202899	mRNA HIGH	9	0.026087	mRNA LOW	0	0	FUSION	0	0	MISSENSE, INFRAME, TRUNCATING MUTATIONS (PUTATIVE DRIVER)	0	0
VHL	ALL	23	0.0666667	AMPLIFICATION	4	0.0115942	DEEP DELETION	0	0	mRNA HIGH	19	0.0550725	mRNA LOW	0	0	FUSION	0	0	MISSENSE, INFRAME, TRUNCATING MUTATIONS (PUTATIVE DRIVER)	0	0
VLDLR	ALL	14	0.0405797	AMPLIFICATION	2	0.0057971	DEEP DELETION	2	0.0057971	mRNA HIGH	10	0.0289855	mRNA LOW	0	0	FUSION	0	0	MISSENSE, INFRAME, TRUNCATING MUTATIONS (PUTATIVE DRIVER)	0	0

## Sheet: ST_10
Supplementary Table 10. Frequency of genetic alterations in the hypoxia-related genes of 501 individuals with lung adenocarcinoma from the TCGA Pan-Cancer Atlas project (TCGA-LUAD-PanCancer).
GENE	TYPE	TOTAL	FREQUENCY	TYPE	TOTAL	FREQUENCY	TYPE	TOTAL	FREQUENCY	TYPE	TOTAL	FREQUENCY	TYPE	TOTAL	FREQUENCY	TYPE	TOTAL	FREQUENCY	TYPE	TOTAL	FREQUENCY
ACTN4	ALL	57	0.113772	AMPLIFICATION	9	0.0179641	DEEP DELETION	0	0	mRNA HIGH	43	0.0858283	mRNA LOW	4	0.00798403	FUSION	1	0.00199601	MISSENSE, INFRAME, TRUNCATING MUTATIONS (PUTATIVE DRIVER)	0	0
ADA	ALL	19	0.0379242	AMPLIFICATION	4	0.00798403	DEEP DELETION	1	0.00199601	mRNA HIGH	14	0.0279441	mRNA LOW	0	0	FUSION	0	0	MISSENSE, INFRAME, TRUNCATING MUTATIONS (PUTATIVE DRIVER)	0	0
ADAM8	ALL	18	0.0359281	AMPLIFICATION	1	0.00199601	DEEP DELETION	4	0.00798403	mRNA HIGH	13	0.0259481	mRNA LOW	0	0	FUSION	0	0	MISSENSE, INFRAME, TRUNCATING MUTATIONS (PUTATIVE DRIVER)	0	0
ADM	ALL	29	0.0578842	AMPLIFICATION	3	0.00598802	DEEP DELETION	4	0.00798403	mRNA HIGH	22	0.0439122	mRNA LOW	0	0	FUSION	0	0	MISSENSE, INFRAME, TRUNCATING MUTATIONS (PUTATIVE DRIVER)	0	0
ADORA1	ALL	59	0.117764	AMPLIFICATION	18	0.0359281	DEEP DELETION	0	0	mRNA HIGH	41	0.0818363	mRNA LOW	0	0	FUSION	0	0	MISSENSE, INFRAME, TRUNCATING MUTATIONS (PUTATIVE DRIVER)	0	0
ADRA1B	ALL	26	0.0518962	AMPLIFICATION	5	0.00998004	DEEP DELETION	2	0.00399202	mRNA HIGH	19	0.0379242	mRNA LOW	0	0	FUSION	0	0	MISSENSE, INFRAME, TRUNCATING MUTATIONS (PUTATIVE DRIVER)	0	0
AKT1	ALL	69	0.137725	AMPLIFICATION	5	0.00998004	DEEP DELETION	2	0.00399202	mRNA HIGH	44	0.0878244	mRNA LOW	15	0.0299401	FUSION	0	0	MISSENSE, INFRAME, TRUNCATING MUTATIONS (PUTATIVE DRIVER)	3	0.00598802
AKT2	ALL	71	0.141717	AMPLIFICATION	6	0.011976	DEEP DELETION	0	0	mRNA HIGH	55	0.10978	mRNA LOW	10	0.0199601	FUSION	0	0	MISSENSE, INFRAME, TRUNCATING MUTATIONS (PUTATIVE DRIVER)	0	0
AKT3	ALL	53	0.105788	AMPLIFICATION	25	0.0499002	DEEP DELETION	0	0	mRNA HIGH	28	0.0558882	mRNA LOW	0	0	FUSION	0	0	MISSENSE, INFRAME, TRUNCATING MUTATIONS (PUTATIVE DRIVER)	0	0
ALAS2	ALL	18	0.0359281	AMPLIFICATION	3	0.00598802	DEEP DELETION	1	0.00199601	mRNA HIGH	14	0.0279441	mRNA LOW	0	0	FUSION	0	0	MISSENSE, INFRAME, TRUNCATING MUTATIONS (PUTATIVE DRIVER)	0	0
ALDOA	ALL	53	0.105788	AMPLIFICATION	5	0.00998004	DEEP DELETION	0	0	mRNA HIGH	48	0.0958084	mRNA LOW	0	0	FUSION	0	0	MISSENSE, INFRAME, TRUNCATING MUTATIONS (PUTATIVE DRIVER)	0	0
ALDOB	ALL	9	0.0179641	AMPLIFICATION	2	0.00399202	DEEP DELETION	4	0.00798403	mRNA HIGH	3	0.00598802	mRNA LOW	0	0	FUSION	0	0	MISSENSE, INFRAME, TRUNCATING MUTATIONS (PUTATIVE DRIVER)	0	0
ALDOC	ALL	34	0.0678643	AMPLIFICATION	5	0.00998004	DEEP DELETION	0	0	mRNA HIGH	29	0.0578842	mRNA LOW	0	0	FUSION	0	0	MISSENSE, INFRAME, TRUNCATING MUTATIONS (PUTATIVE DRIVER)	0	0
ANG	ALL	27	0.0538922	AMPLIFICATION	9	0.0179641	DEEP DELETION	0	0	mRNA HIGH	18	0.0359281	mRNA LOW	0	0	FUSION	0	0	MISSENSE, INFRAME, TRUNCATING MUTATIONS (PUTATIVE DRIVER)	0	0
ANGPT1	ALL	44	0.0878244	AMPLIFICATION	20	0.0399202	DEEP DELETION	1	0.00199601	mRNA HIGH	22	0.0439122	mRNA LOW	0	0	FUSION	1	0.00199601	MISSENSE, INFRAME, TRUNCATING MUTATIONS (PUTATIVE DRIVER)	0	0
ANGPT2	ALL	30	0.0598802	AMPLIFICATION	1	0.00199601	DEEP DELETION	25	0.0499002	mRNA HIGH	4	0.00798403	mRNA LOW	0	0	FUSION	0	0	MISSENSE, INFRAME, TRUNCATING MUTATIONS (PUTATIVE DRIVER)	0	0
ANGPT4	ALL	18	0.0359281	AMPLIFICATION	3	0.00598802	DEEP DELETION	5	0.00998004	mRNA HIGH	10	0.0199601	mRNA LOW	0	0	FUSION	0	0	MISSENSE, INFRAME, TRUNCATING MUTATIONS (PUTATIVE DRIVER)	0	0
ANGPTL4	ALL	22	0.0439122	AMPLIFICATION	0	0	DEEP DELETION	2	0.00399202	mRNA HIGH	20	0.0399202	mRNA LOW	0	0	FUSION	0	0	MISSENSE, INFRAME, TRUNCATING MUTATIONS (PUTATIVE DRIVER)	0	0
AQP1	ALL	32	0.0638723	AMPLIFICATION	6	0.011976	DEEP DELETION	3	0.00598802	mRNA HIGH	23	0.0459082	mRNA LOW	0	0	FUSION	0	0	MISSENSE, INFRAME, TRUNCATING MUTATIONS (PUTATIVE DRIVER)	0	0
ARG2	ALL	37	0.0738523	AMPLIFICATION	1	0.00199601	DEEP DELETION	0	0	mRNA HIGH	36	0.0718563	mRNA LOW	0	0	FUSION	0	0	MISSENSE, INFRAME, TRUNCATING MUTATIONS (PUTATIVE DRIVER)	0	0
ARNT	ALL	174	0.347305	AMPLIFICATION	54	0.107784	DEEP DELETION	0	0	mRNA HIGH	115	0.229541	mRNA LOW	4	0.00798403	FUSION	1	0.00199601	MISSENSE, INFRAME, TRUNCATING MUTATIONS (PUTATIVE DRIVER)	0	0
ARNT2	ALL	17	0.0339321	AMPLIFICATION	2	0.00399202	DEEP DELETION	0	0	mRNA HIGH	14	0.0279441	mRNA LOW	0	0	FUSION	1	0.00199601	MISSENSE, INFRAME, TRUNCATING MUTATIONS (PUTATIVE DRIVER)	0	0
ASCL2	ALL	18	0.0359281	AMPLIFICATION	1	0.00199601	DEEP DELETION	3	0.00598802	mRNA HIGH	14	0.0279441	mRNA LOW	0	0	FUSION	0	0	MISSENSE, INFRAME, TRUNCATING MUTATIONS (PUTATIVE DRIVER)	0	0
ATP1A1	ALL	29	0.0578842	AMPLIFICATION	2	0.00399202	DEEP DELETION	9	0.0179641	mRNA HIGH	18	0.0359281	mRNA LOW	0	0	FUSION	0	0	MISSENSE, INFRAME, TRUNCATING MUTATIONS (PUTATIVE DRIVER)	0	0
ATP1A2	ALL	47	0.0938124	AMPLIFICATION	35	0.0698603	DEEP DELETION	0	0	mRNA HIGH	12	0.0239521	mRNA LOW	0	0	FUSION	0	0	MISSENSE, INFRAME, TRUNCATING MUTATIONS (PUTATIVE DRIVER)	0	0
ATP1B1	ALL	126	0.251497	AMPLIFICATION	24	0.0479042	DEEP DELETION	1	0.00199601	mRNA HIGH	100	0.199601	mRNA LOW	0	0	FUSION	1	0.00199601	MISSENSE, INFRAME, TRUNCATING MUTATIONS (PUTATIVE DRIVER)	0	0
BACH1	ALL	22	0.0439122	AMPLIFICATION	3	0.00598802	DEEP DELETION	2	0.00399202	mRNA HIGH	17	0.0339321	mRNA LOW	0	0	FUSION	0	0	MISSENSE, INFRAME, TRUNCATING MUTATIONS (PUTATIVE DRIVER)	0	0
BAD	ALL	39	0.0778443	AMPLIFICATION	1	0.00199601	DEEP DELETION	1	0.00199601	mRNA HIGH	32	0.0638723	mRNA LOW	4	0.00798403	FUSION	1	0.00199601	MISSENSE, INFRAME, TRUNCATING MUTATIONS (PUTATIVE DRIVER)	0	0
BBC3	ALL	16	0.0319361	AMPLIFICATION	0	0	DEEP DELETION	0	0	mRNA HIGH	16	0.0319361	mRNA LOW	0	0	FUSION	0	0	MISSENSE, INFRAME, TRUNCATING MUTATIONS (PUTATIVE DRIVER)	0	0
BCL2	ALL	32	0.0638723	AMPLIFICATION	3	0.00598802	DEEP DELETION	6	0.011976	mRNA HIGH	23	0.0459082	mRNA LOW	0	0	FUSION	0	0	MISSENSE, INFRAME, TRUNCATING MUTATIONS (PUTATIVE DRIVER)	0	0
BNIP3	ALL	30	0.0598802	AMPLIFICATION	1	0.00199601	DEEP DELETION	4	0.00798403	mRNA HIGH	25	0.0499002	mRNA LOW	0	0	FUSION	0	0	MISSENSE, INFRAME, TRUNCATING MUTATIONS (PUTATIVE DRIVER)	0	0
CAMK2A	ALL	9	0.0179641	AMPLIFICATION	4	0.00798403	DEEP DELETION	3	0.00598802	mRNA HIGH	2	0.00399202	mRNA LOW	0	0	FUSION	0	0	MISSENSE, INFRAME, TRUNCATING MUTATIONS (PUTATIVE DRIVER)	0	0
CAMK2B	ALL	27	0.0538922	AMPLIFICATION	9	0.0179641	DEEP DELETION	2	0.00399202	mRNA HIGH	15	0.0299401	mRNA LOW	0	0	FUSION	1	0.00199601	MISSENSE, INFRAME, TRUNCATING MUTATIONS (PUTATIVE DRIVER)	0	0
CAMK2D	ALL	20	0.0399202	AMPLIFICATION	0	0	DEEP DELETION	0	0	mRNA HIGH	20	0.0399202	mRNA LOW	0	0	FUSION	0	0	MISSENSE, INFRAME, TRUNCATING MUTATIONS (PUTATIVE DRIVER)	0	0
CAMK2G	ALL	28	0.0558882	AMPLIFICATION	1	0.00199601	DEEP DELETION	1	0.00199601	mRNA HIGH	25	0.0499002	mRNA LOW	1	0.00199601	FUSION	0	0	MISSENSE, INFRAME, TRUNCATING MUTATIONS (PUTATIVE DRIVER)	0	0
CASR	ALL	12	0.0239521	AMPLIFICATION	2	0.00399202	DEEP DELETION	0	0	mRNA HIGH	9	0.0179641	mRNA LOW	0	0	FUSION	1	0.00199601	MISSENSE, INFRAME, TRUNCATING MUTATIONS (PUTATIVE DRIVER)	0	0
CAV1	ALL	33	0.0658683	AMPLIFICATION	9	0.0179641	DEEP DELETION	3	0.00598802	mRNA HIGH	21	0.0419162	mRNA LOW	0	0	FUSION	0	0	MISSENSE, INFRAME, TRUNCATING MUTATIONS (PUTATIVE DRIVER)	0	0
CCL2	ALL	20	0.0399202	AMPLIFICATION	1	0.00199601	DEEP DELETION	0	0	mRNA HIGH	19	0.0379242	mRNA LOW	0	0	FUSION	0	0	MISSENSE, INFRAME, TRUNCATING MUTATIONS (PUTATIVE DRIVER)	0	0
CD24	ALL	0	0	AMPLIFICATION	0	0	DEEP DELETION	0	0	mRNA HIGH	0	0	mRNA LOW	0	0	FUSION	0	0	MISSENSE, INFRAME, TRUNCATING MUTATIONS (PUTATIVE DRIVER)	0	0
CDH1	ALL	40	0.0798403	AMPLIFICATION	1	0.00199601	DEEP DELETION	1	0.00199601	mRNA HIGH	32	0.0638723	mRNA LOW	3	0.00598802	FUSION	2	0.00399202	MISSENSE, INFRAME, TRUNCATING MUTATIONS (PUTATIVE DRIVER)	1	0.00199601
CDKN1A	ALL	16	0.0319361	AMPLIFICATION	4	0.00798403	DEEP DELETION	0	0	mRNA HIGH	12	0.0239521	mRNA LOW	0	0	FUSION	0	0	MISSENSE, INFRAME, TRUNCATING MUTATIONS (PUTATIVE DRIVER)	0	0
CDKN1B	ALL	49	0.0978044	AMPLIFICATION	2	0.00399202	DEEP DELETION	8	0.0159681	mRNA HIGH	24	0.0479042	mRNA LOW	11	0.0219561	FUSION	0	0	MISSENSE, INFRAME, TRUNCATING MUTATIONS (PUTATIVE DRIVER)	4	0.00798403
CHRNA7	ALL	28	0.0558882	AMPLIFICATION	1	0.00199601	DEEP DELETION	13	0.0259481	mRNA HIGH	14	0.0279441	mRNA LOW	0	0	FUSION	0	0	MISSENSE, INFRAME, TRUNCATING MUTATIONS (PUTATIVE DRIVER)	0	0
CHRNB2	ALL	57	0.113772	AMPLIFICATION	49	0.0978044	DEEP DELETION	0	0	mRNA HIGH	8	0.0159681	mRNA LOW	0	0	FUSION	0	0	MISSENSE, INFRAME, TRUNCATING MUTATIONS (PUTATIVE DRIVER)	0	0
CIAO3	ALL	60	0.11976	AMPLIFICATION	3	0.00598802	DEEP DELETION	1	0.00199601	mRNA HIGH	50	0.0998004	mRNA LOW	6	0.011976	FUSION	0	0	MISSENSE, INFRAME, TRUNCATING MUTATIONS (PUTATIVE DRIVER)	0	0
CITED2	ALL	26	0.0518962	AMPLIFICATION	3	0.00598802	DEEP DELETION	2	0.00399202	mRNA HIGH	21	0.0419162	mRNA LOW	0	0	FUSION	0	0	MISSENSE, INFRAME, TRUNCATING MUTATIONS (PUTATIVE DRIVER)	0	0
CLDN3	ALL	36	0.0718563	AMPLIFICATION	3	0.00598802	DEEP DELETION	2	0.00399202	mRNA HIGH	31	0.0618762	mRNA LOW	0	0	FUSION	0	0	MISSENSE, INFRAME, TRUNCATING MUTATIONS (PUTATIVE DRIVER)	0	0
COPS5	ALL	98	0.195609	AMPLIFICATION	14	0.0279441	DEEP DELETION	1	0.00199601	mRNA HIGH	83	0.165669	mRNA LOW	0	0	FUSION	0	0	MISSENSE, INFRAME, TRUNCATING MUTATIONS (PUTATIVE DRIVER)	0	0
CREBBP	ALL	54	0.107784	AMPLIFICATION	3	0.00598802	DEEP DELETION	2	0.00399202	mRNA HIGH	34	0.0678643	mRNA LOW	8	0.0159681	FUSION	2	0.00399202	MISSENSE, INFRAME, TRUNCATING MUTATIONS (PUTATIVE DRIVER)	5	0.00998004
CUL2	ALL	63	0.125749	AMPLIFICATION	10	0.0199601	DEEP DELETION	0	0	mRNA HIGH	52	0.103792	mRNA LOW	0	0	FUSION	1	0.00199601	MISSENSE, INFRAME, TRUNCATING MUTATIONS (PUTATIVE DRIVER)	0	0
CXCR4	ALL	15	0.0299401	AMPLIFICATION	2	0.00399202	DEEP DELETION	0	0	mRNA HIGH	13	0.0259481	mRNA LOW	0	0	FUSION	0	0	MISSENSE, INFRAME, TRUNCATING MUTATIONS (PUTATIVE DRIVER)	0	0
CYBB	ALL	25	0.0499002	AMPLIFICATION	4	0.00798403	DEEP DELETION	3	0.00598802	mRNA HIGH	18	0.0359281	mRNA LOW	0	0	FUSION	0	0	MISSENSE, INFRAME, TRUNCATING MUTATIONS (PUTATIVE DRIVER)	0	0
CYP1A1	ALL	8	0.0159681	AMPLIFICATION	4	0.00798403	DEEP DELETION	0	0	mRNA HIGH	4	0.00798403	mRNA LOW	0	0	FUSION	0	0	MISSENSE, INFRAME, TRUNCATING MUTATIONS (PUTATIVE DRIVER)	0	0
DDIT4	ALL	21	0.0419162	AMPLIFICATION	2	0.00399202	DEEP DELETION	1	0.00199601	mRNA HIGH	18	0.0359281	mRNA LOW	0	0	FUSION	0	0	MISSENSE, INFRAME, TRUNCATING MUTATIONS (PUTATIVE DRIVER)	0	0
DPP4	ALL	24	0.0479042	AMPLIFICATION	2	0.00399202	DEEP DELETION	0	0	mRNA HIGH	22	0.0439122	mRNA LOW	0	0	FUSION	0	0	MISSENSE, INFRAME, TRUNCATING MUTATIONS (PUTATIVE DRIVER)	0	0
E2F1	ALL	72	0.143713	AMPLIFICATION	3	0.00598802	DEEP DELETION	0	0	mRNA HIGH	69	0.137725	mRNA LOW	0	0	FUSION	0	0	MISSENSE, INFRAME, TRUNCATING MUTATIONS (PUTATIVE DRIVER)	0	0
EDN1	ALL	31	0.0618762	AMPLIFICATION	5	0.00998004	DEEP DELETION	1	0.00199601	mRNA HIGH	25	0.0499002	mRNA LOW	0	0	FUSION	0	0	MISSENSE, INFRAME, TRUNCATING MUTATIONS (PUTATIVE DRIVER)	0	0
EDNRA	ALL	24	0.0479042	AMPLIFICATION	1	0.00199601	DEEP DELETION	1	0.00199601	mRNA HIGH	22	0.0439122	mRNA LOW	0	0	FUSION	0	0	MISSENSE, INFRAME, TRUNCATING MUTATIONS (PUTATIVE DRIVER)	0	0
EDNRB	ALL	15	0.0299401	AMPLIFICATION	2	0.00399202	DEEP DELETION	3	0.00598802	mRNA HIGH	10	0.0199601	mRNA LOW	0	0	FUSION	0	0	MISSENSE, INFRAME, TRUNCATING MUTATIONS (PUTATIVE DRIVER)	0	0
EGF	ALL	8	0.0159681	AMPLIFICATION	1	0.00199601	DEEP DELETION	0	0	mRNA HIGH	7	0.0139721	mRNA LOW	0	0	FUSION	0	0	MISSENSE, INFRAME, TRUNCATING MUTATIONS (PUTATIVE DRIVER)	0	0
EGFR	ALL	165	0.329341	AMPLIFICATION	26	0.0518962	DEEP DELETION	3	0.00598802	mRNA HIGH	81	0.161677	mRNA LOW	0	0	FUSION	0	0	MISSENSE, INFRAME, TRUNCATING MUTATIONS (PUTATIVE DRIVER)	55	0.10978
EGLN1	ALL	67	0.133733	AMPLIFICATION	16	0.0319361	DEEP DELETION	0	0	mRNA HIGH	51	0.101796	mRNA LOW	0	0	FUSION	0	0	MISSENSE, INFRAME, TRUNCATING MUTATIONS (PUTATIVE DRIVER)	0	0
EGLN2	ALL	40	0.0798403	AMPLIFICATION	5	0.00998004	DEEP DELETION	0	0	mRNA HIGH	32	0.0638723	mRNA LOW	2	0.00399202	FUSION	1	0.00199601	MISSENSE, INFRAME, TRUNCATING MUTATIONS (PUTATIVE DRIVER)	0	0
EGLN3	ALL	82	0.163673	AMPLIFICATION	42	0.0838323	DEEP DELETION	1	0.00199601	mRNA HIGH	39	0.0778443	mRNA LOW	0	0	FUSION	0	0	MISSENSE, INFRAME, TRUNCATING MUTATIONS (PUTATIVE DRIVER)	0	0
EIF4E	ALL	14	0.0279441	AMPLIFICATION	0	0	DEEP DELETION	0	0	mRNA HIGH	14	0.0279441	mRNA LOW	0	0	FUSION	0	0	MISSENSE, INFRAME, TRUNCATING MUTATIONS (PUTATIVE DRIVER)	0	0
EIF4E1B	ALL	28	0.0558882	AMPLIFICATION	8	0.0159681	DEEP DELETION	6	0.011976	mRNA HIGH	14	0.0279441	mRNA LOW	0	0	FUSION	0	0	MISSENSE, INFRAME, TRUNCATING MUTATIONS (PUTATIVE DRIVER)	0	0
EIF4E2	ALL	27	0.0538922	AMPLIFICATION	4	0.00798403	DEEP DELETION	0	0	mRNA HIGH	23	0.0459082	mRNA LOW	0	0	FUSION	0	0	MISSENSE, INFRAME, TRUNCATING MUTATIONS (PUTATIVE DRIVER)	0	0
EIF4EBP1	ALL	86	0.171657	AMPLIFICATION	15	0.0299401	DEEP DELETION	12	0.0239521	mRNA HIGH	59	0.117764	mRNA LOW	0	0	FUSION	0	0	MISSENSE, INFRAME, TRUNCATING MUTATIONS (PUTATIVE DRIVER)	0	0
ELF2	ALL	38	0.0758483	AMPLIFICATION	1	0.00199601	DEEP DELETION	0	0	mRNA HIGH	21	0.0419162	mRNA LOW	16	0.0319361	FUSION	0	0	MISSENSE, INFRAME, TRUNCATING MUTATIONS (PUTATIVE DRIVER)	0	0
ELOB	ALL	35	0.0698603	AMPLIFICATION	2	0.00399202	DEEP DELETION	1	0.00199601	mRNA HIGH	32	0.0638723	mRNA LOW	0	0	FUSION	0	0	MISSENSE, INFRAME, TRUNCATING MUTATIONS (PUTATIVE DRIVER)	0	0
ELOC	ALL	103	0.205589	AMPLIFICATION	17	0.0339321	DEEP DELETION	1	0.00199601	mRNA HIGH	85	0.169661	mRNA LOW	0	0	FUSION	0	0	MISSENSE, INFRAME, TRUNCATING MUTATIONS (PUTATIVE DRIVER)	0	0
ENG	ALL	20	0.0399202	AMPLIFICATION	0	0	DEEP DELETION	1	0.00199601	mRNA HIGH	19	0.0379242	mRNA LOW	0	0	FUSION	0	0	MISSENSE, INFRAME, TRUNCATING MUTATIONS (PUTATIVE DRIVER)	0	0
ENO1	ALL	30	0.0598802	AMPLIFICATION	2	0.00399202	DEEP DELETION	2	0.00399202	mRNA HIGH	26	0.0518962	mRNA LOW	0	0	FUSION	0	0	MISSENSE, INFRAME, TRUNCATING MUTATIONS (PUTATIVE DRIVER)	0	0
ENO2	ALL	37	0.0738523	AMPLIFICATION	6	0.011976	DEEP DELETION	4	0.00798403	mRNA HIGH	27	0.0538922	mRNA LOW	0	0	FUSION	0	0	MISSENSE, INFRAME, TRUNCATING MUTATIONS (PUTATIVE DRIVER)	0	0
ENO3	ALL	25	0.0499002	AMPLIFICATION	0	0	DEEP DELETION	6	0.011976	mRNA HIGH	18	0.0359281	mRNA LOW	0	0	FUSION	1	0.00199601	MISSENSE, INFRAME, TRUNCATING MUTATIONS (PUTATIVE DRIVER)	0	0
ENO4	ALL	2	0.00399202	AMPLIFICATION	1	0.00199601	DEEP DELETION	1	0.00199601	mRNA HIGH	0	0	mRNA LOW	0	0	FUSION	0	0	MISSENSE, INFRAME, TRUNCATING MUTATIONS (PUTATIVE DRIVER)	0	0
EP300	ALL	35	0.0698603	AMPLIFICATION	1	0.00199601	DEEP DELETION	2	0.00399202	mRNA HIGH	18	0.0359281	mRNA LOW	12	0.0239521	FUSION	0	0	MISSENSE, INFRAME, TRUNCATING MUTATIONS (PUTATIVE DRIVER)	2	0.00399202
EPAS1	ALL	23	0.0459082	AMPLIFICATION	3	0.00598802	DEEP DELETION	0	0	mRNA HIGH	20	0.0399202	mRNA LOW	0	0	FUSION	0	0	MISSENSE, INFRAME, TRUNCATING MUTATIONS (PUTATIVE DRIVER)	0	0
EPO	ALL	27	0.0538922	AMPLIFICATION	12	0.0239521	DEEP DELETION	0	0	mRNA HIGH	15	0.0299401	mRNA LOW	0	0	FUSION	0	0	MISSENSE, INFRAME, TRUNCATING MUTATIONS (PUTATIVE DRIVER)	0	0
ERBB2	ALL	70	0.139721	AMPLIFICATION	9	0.0179641	DEEP DELETION	0	0	mRNA HIGH	55	0.10978	mRNA LOW	0	0	FUSION	1	0.00199601	MISSENSE, INFRAME, TRUNCATING MUTATIONS (PUTATIVE DRIVER)	5	0.00998004
ETS1	ALL	23	0.0459082	AMPLIFICATION	5	0.00998004	DEEP DELETION	4	0.00798403	mRNA HIGH	14	0.0279441	mRNA LOW	0	0	FUSION	0	0	MISSENSE, INFRAME, TRUNCATING MUTATIONS (PUTATIVE DRIVER)	0	0
FLT1	ALL	24	0.0479042	AMPLIFICATION	1	0.00199601	DEEP DELETION	3	0.00598802	mRNA HIGH	20	0.0399202	mRNA LOW	0	0	FUSION	0	0	MISSENSE, INFRAME, TRUNCATING MUTATIONS (PUTATIVE DRIVER)	0	0
GAPDH	ALL	44	0.0878244	AMPLIFICATION	5	0.00998004	DEEP DELETION	4	0.00798403	mRNA HIGH	34	0.0678643	mRNA LOW	0	0	FUSION	1	0.00199601	MISSENSE, INFRAME, TRUNCATING MUTATIONS (PUTATIVE DRIVER)	0	0
GATA6	ALL	35	0.0698603	AMPLIFICATION	12	0.0239521	DEEP DELETION	0	0	mRNA HIGH	22	0.0439122	mRNA LOW	0	0	FUSION	1	0.00199601	MISSENSE, INFRAME, TRUNCATING MUTATIONS (PUTATIVE DRIVER)	0	0
HBB	ALL	15	0.0299401	AMPLIFICATION	1	0.00199601	DEEP DELETION	2	0.00399202	mRNA HIGH	12	0.0239521	mRNA LOW	0	0	FUSION	0	0	MISSENSE, INFRAME, TRUNCATING MUTATIONS (PUTATIVE DRIVER)	0	0
HBG2	ALL	12	0.0239521	AMPLIFICATION	1	0.00199601	DEEP DELETION	2	0.00399202	mRNA HIGH	9	0.0179641	mRNA LOW	0	0	FUSION	0	0	MISSENSE, INFRAME, TRUNCATING MUTATIONS (PUTATIVE DRIVER)	0	0
HIF1A	ALL	34	0.0678643	AMPLIFICATION	5	0.00998004	DEEP DELETION	1	0.00199601	mRNA HIGH	27	0.0538922	mRNA LOW	0	0	FUSION	1	0.00199601	MISSENSE, INFRAME, TRUNCATING MUTATIONS (PUTATIVE DRIVER)	0	0
HIF3A	ALL	34	0.0678643	AMPLIFICATION	3	0.00598802	DEEP DELETION	0	0	mRNA HIGH	31	0.0618762	mRNA LOW	0	0	FUSION	0	0	MISSENSE, INFRAME, TRUNCATING MUTATIONS (PUTATIVE DRIVER)	0	0
HK1	ALL	42	0.0838323	AMPLIFICATION	3	0.00598802	DEEP DELETION	1	0.00199601	mRNA HIGH	21	0.0419162	mRNA LOW	17	0.0339321	FUSION	0	0	MISSENSE, INFRAME, TRUNCATING MUTATIONS (PUTATIVE DRIVER)	0	0
HK2	ALL	24	0.0479042	AMPLIFICATION	2	0.00399202	DEEP DELETION	0	0	mRNA HIGH	22	0.0439122	mRNA LOW	0	0	FUSION	0	0	MISSENSE, INFRAME, TRUNCATING MUTATIONS (PUTATIVE DRIVER)	0	0
HK3	ALL	29	0.0578842	AMPLIFICATION	8	0.0159681	DEEP DELETION	6	0.011976	mRNA HIGH	15	0.0299401	mRNA LOW	0	0	FUSION	0	0	MISSENSE, INFRAME, TRUNCATING MUTATIONS (PUTATIVE DRIVER)	0	0
HKDC1	ALL	26	0.0518962	AMPLIFICATION	3	0.00598802	DEEP DELETION	1	0.00199601	mRNA HIGH	22	0.0439122	mRNA LOW	0	0	FUSION	0	0	MISSENSE, INFRAME, TRUNCATING MUTATIONS (PUTATIVE DRIVER)	0	0
HMBS	ALL	34	0.0678643	AMPLIFICATION	4	0.00798403	DEEP DELETION	2	0.00399202	mRNA HIGH	27	0.0538922	mRNA LOW	0	0	FUSION	1	0.00199601	MISSENSE, INFRAME, TRUNCATING MUTATIONS (PUTATIVE DRIVER)	0	0
HMOX1	ALL	15	0.0299401	AMPLIFICATION	3	0.00598802	DEEP DELETION	2	0.00399202	mRNA HIGH	10	0.0199601	mRNA LOW	0	0	FUSION	0	0	MISSENSE, INFRAME, TRUNCATING MUTATIONS (PUTATIVE DRIVER)	0	0
HMOX2	ALL	58	0.115768	AMPLIFICATION	5	0.00998004	DEEP DELETION	1	0.00199601	mRNA HIGH	50	0.0998004	mRNA LOW	1	0.00199601	FUSION	1	0.00199601	MISSENSE, INFRAME, TRUNCATING MUTATIONS (PUTATIVE DRIVER)	0	0
HSP90B1	ALL	40	0.0798403	AMPLIFICATION	0	0	DEEP DELETION	2	0.00399202	mRNA HIGH	38	0.0758483	mRNA LOW	0	0	FUSION	0	0	MISSENSE, INFRAME, TRUNCATING MUTATIONS (PUTATIVE DRIVER)	0	0
HYOU1	ALL	50	0.0998004	AMPLIFICATION	4	0.00798403	DEEP DELETION	2	0.00399202	mRNA HIGH	44	0.0878244	mRNA LOW	0	0	FUSION	0	0	MISSENSE, INFRAME, TRUNCATING MUTATIONS (PUTATIVE DRIVER)	0	0
IFNG	ALL	46	0.0918164	AMPLIFICATION	21	0.0419162	DEEP DELETION	0	0	mRNA HIGH	25	0.0499002	mRNA LOW	0	0	FUSION	0	0	MISSENSE, INFRAME, TRUNCATING MUTATIONS (PUTATIVE DRIVER)	0	0
IFNGR1	ALL	20	0.0399202	AMPLIFICATION	2	0.00399202	DEEP DELETION	2	0.00399202	mRNA HIGH	16	0.0319361	mRNA LOW	0	0	FUSION	0	0	MISSENSE, INFRAME, TRUNCATING MUTATIONS (PUTATIVE DRIVER)	0	0
IFNGR2	ALL	37	0.0738523	AMPLIFICATION	3	0.00598802	DEEP DELETION	0	0	mRNA HIGH	34	0.0678643	mRNA LOW	0	0	FUSION	0	0	MISSENSE, INFRAME, TRUNCATING MUTATIONS (PUTATIVE DRIVER)	0	0
IGF1	ALL	18	0.0359281	AMPLIFICATION	0	0	DEEP DELETION	2	0.00399202	mRNA HIGH	16	0.0319361	mRNA LOW	0	0	FUSION	0	0	MISSENSE, INFRAME, TRUNCATING MUTATIONS (PUTATIVE DRIVER)	0	0
IGF1R	ALL	37	0.0738523	AMPLIFICATION	5	0.00998004	DEEP DELETION	4	0.00798403	mRNA HIGH	28	0.0558882	mRNA LOW	0	0	FUSION	0	0	MISSENSE, INFRAME, TRUNCATING MUTATIONS (PUTATIVE DRIVER)	0	0
IGFBP1	ALL	19	0.0379242	AMPLIFICATION	10	0.0199601	DEEP DELETION	2	0.00399202	mRNA HIGH	7	0.0139721	mRNA LOW	0	0	FUSION	0	0	MISSENSE, INFRAME, TRUNCATING MUTATIONS (PUTATIVE DRIVER)	0	0
IGFBP2	ALL	27	0.0538922	AMPLIFICATION	2	0.00399202	DEEP DELETION	0	0	mRNA HIGH	25	0.0499002	mRNA LOW	0	0	FUSION	0	0	MISSENSE, INFRAME, TRUNCATING MUTATIONS (PUTATIVE DRIVER)	0	0
IL1A	ALL	22	0.0439122	AMPLIFICATION	1	0.00199601	DEEP DELETION	0	0	mRNA HIGH	21	0.0419162	mRNA LOW	0	0	FUSION	0	0	MISSENSE, INFRAME, TRUNCATING MUTATIONS (PUTATIVE DRIVER)	0	0
IL1B	ALL	21	0.0419162	AMPLIFICATION	1	0.00199601	DEEP DELETION	0	0	mRNA HIGH	20	0.0399202	mRNA LOW	0	0	FUSION	0	0	MISSENSE, INFRAME, TRUNCATING MUTATIONS (PUTATIVE DRIVER)	0	0
IL6	ALL	33	0.0658683	AMPLIFICATION	13	0.0259481	DEEP DELETION	3	0.00598802	mRNA HIGH	17	0.0339321	mRNA LOW	0	0	FUSION	0	0	MISSENSE, INFRAME, TRUNCATING MUTATIONS (PUTATIVE DRIVER)	0	0
IL6R	ALL	105	0.209581	AMPLIFICATION	49	0.0978044	DEEP DELETION	0	0	mRNA HIGH	56	0.111776	mRNA LOW	0	0	FUSION	0	0	MISSENSE, INFRAME, TRUNCATING MUTATIONS (PUTATIVE DRIVER)	0	0
INS	ALL	5	0.00998004	AMPLIFICATION	1	0.00199601	DEEP DELETION	3	0.00598802	mRNA HIGH	1	0.00199601	mRNA LOW	0	0	FUSION	0	0	MISSENSE, INFRAME, TRUNCATING MUTATIONS (PUTATIVE DRIVER)	0	0
INSR	ALL	29	0.0578842	AMPLIFICATION	0	0	DEEP DELETION	2	0.00399202	mRNA HIGH	26	0.0518962	mRNA LOW	0	0	FUSION	1	0.00199601	MISSENSE, INFRAME, TRUNCATING MUTATIONS (PUTATIVE DRIVER)	0	0
ITPR1	ALL	18	0.0359281	AMPLIFICATION	0	0	DEEP DELETION	3	0.00598802	mRNA HIGH	15	0.0299401	mRNA LOW	0	0	FUSION	0	0	MISSENSE, INFRAME, TRUNCATING MUTATIONS (PUTATIVE DRIVER)	0	0
ITPR2	ALL	58	0.115768	AMPLIFICATION	28	0.0558882	DEEP DELETION	1	0.00199601	mRNA HIGH	26	0.0518962	mRNA LOW	0	0	FUSION	3	0.00598802	MISSENSE, INFRAME, TRUNCATING MUTATIONS (PUTATIVE DRIVER)	0	0
KCNK3	ALL	24	0.0479042	AMPLIFICATION	3	0.00598802	DEEP DELETION	0	0	mRNA HIGH	21	0.0419162	mRNA LOW	0	0	FUSION	0	0	MISSENSE, INFRAME, TRUNCATING MUTATIONS (PUTATIVE DRIVER)	0	0
KCNMA1	ALL	23	0.0459082	AMPLIFICATION	2	0.00399202	DEEP DELETION	1	0.00199601	mRNA HIGH	20	0.0399202	mRNA LOW	0	0	FUSION	0	0	MISSENSE, INFRAME, TRUNCATING MUTATIONS (PUTATIVE DRIVER)	0	0
LDHA	ALL	26	0.0518962	AMPLIFICATION	2	0.00399202	DEEP DELETION	1	0.00199601	mRNA HIGH	23	0.0459082	mRNA LOW	0	0	FUSION	0	0	MISSENSE, INFRAME, TRUNCATING MUTATIONS (PUTATIVE DRIVER)	0	0
LDHAL6A	ALL	16	0.0319361	AMPLIFICATION	1	0.00199601	DEEP DELETION	1	0.00199601	mRNA HIGH	14	0.0279441	mRNA LOW	0	0	FUSION	0	0	MISSENSE, INFRAME, TRUNCATING MUTATIONS (PUTATIVE DRIVER)	0	0
LDHAL6B	ALL	19	0.0379242	AMPLIFICATION	0	0	DEEP DELETION	3	0.00598802	mRNA HIGH	16	0.0319361	mRNA LOW	0	0	FUSION	0	0	MISSENSE, INFRAME, TRUNCATING MUTATIONS (PUTATIVE DRIVER)	0	0
LDHB	ALL	69	0.137725	AMPLIFICATION	20	0.0399202	DEEP DELETION	3	0.00598802	mRNA HIGH	46	0.0918164	mRNA LOW	0	0	FUSION	0	0	MISSENSE, INFRAME, TRUNCATING MUTATIONS (PUTATIVE DRIVER)	0	0
LDHC	ALL	32	0.0638723	AMPLIFICATION	2	0.00399202	DEEP DELETION	1	0.00199601	mRNA HIGH	29	0.0578842	mRNA LOW	0	0	FUSION	0	0	MISSENSE, INFRAME, TRUNCATING MUTATIONS (PUTATIVE DRIVER)	0	0
LMNA	ALL	65	0.129741	AMPLIFICATION	40	0.0798403	DEEP DELETION	0	0	mRNA HIGH	24	0.0479042	mRNA LOW	1	0.00199601	FUSION	0	0	MISSENSE, INFRAME, TRUNCATING MUTATIONS (PUTATIVE DRIVER)	0	0
LTBR	ALL	64	0.127745	AMPLIFICATION	5	0.00998004	DEEP DELETION	4	0.00798403	mRNA HIGH	55	0.10978	mRNA LOW	0	0	FUSION	0	0	MISSENSE, INFRAME, TRUNCATING MUTATIONS (PUTATIVE DRIVER)	0	0
MAP2K1	ALL	29	0.0578842	AMPLIFICATION	1	0.00199601	DEEP DELETION	0	0	mRNA HIGH	23	0.0459082	mRNA LOW	0	0	FUSION	0	0	MISSENSE, INFRAME, TRUNCATING MUTATIONS (PUTATIVE DRIVER)	5	0.00998004
MAP2K2	ALL	22	0.0439122	AMPLIFICATION	0	0	DEEP DELETION	3	0.00598802	mRNA HIGH	14	0.0279441	mRNA LOW	5	0.00998004	FUSION	0	0	MISSENSE, INFRAME, TRUNCATING MUTATIONS (PUTATIVE DRIVER)	0	0
MAPK1	ALL	64	0.127745	AMPLIFICATION	7	0.0139721	DEEP DELETION	0	0	mRNA HIGH	40	0.0798403	mRNA LOW	15	0.0299401	FUSION	2	0.00399202	MISSENSE, INFRAME, TRUNCATING MUTATIONS (PUTATIVE DRIVER)	0	0
MAPK3	ALL	30	0.0598802	AMPLIFICATION	5	0.00998004	DEEP DELETION	0	0	mRNA HIGH	25	0.0499002	mRNA LOW	0	0	FUSION	0	0	MISSENSE, INFRAME, TRUNCATING MUTATIONS (PUTATIVE DRIVER)	0	0
MDM2	ALL	70	0.139721	AMPLIFICATION	25	0.0499002	DEEP DELETION	0	0	mRNA HIGH	44	0.0878244	mRNA LOW	0	0	FUSION	1	0.00199601	MISSENSE, INFRAME, TRUNCATING MUTATIONS (PUTATIVE DRIVER)	0	0
MDM4	ALL	82	0.163673	AMPLIFICATION	20	0.0399202	DEEP DELETION	0	0	mRNA HIGH	62	0.123752	mRNA LOW	0	0	FUSION	0	0	MISSENSE, INFRAME, TRUNCATING MUTATIONS (PUTATIVE DRIVER)	0	0
MKNK1	ALL	24	0.0479042	AMPLIFICATION	3	0.00598802	DEEP DELETION	1	0.00199601	mRNA HIGH	18	0.0359281	mRNA LOW	2	0.00399202	FUSION	0	0	MISSENSE, INFRAME, TRUNCATING MUTATIONS (PUTATIVE DRIVER)	0	0
MKNK2	ALL	29	0.0578842	AMPLIFICATION	0	0	DEEP DELETION	4	0.00798403	mRNA HIGH	15	0.0299401	mRNA LOW	10	0.0199601	FUSION	0	0	MISSENSE, INFRAME, TRUNCATING MUTATIONS (PUTATIVE DRIVER)	0	0
MMP14	ALL	32	0.0638723	AMPLIFICATION	11	0.0219561	DEEP DELETION	1	0.00199601	mRNA HIGH	20	0.0399202	mRNA LOW	0	0	FUSION	0	0	MISSENSE, INFRAME, TRUNCATING MUTATIONS (PUTATIVE DRIVER)	0	0
MMP2	ALL	19	0.0379242	AMPLIFICATION	1	0.00199601	DEEP DELETION	1	0.00199601	mRNA HIGH	17	0.0339321	mRNA LOW	0	0	FUSION	0	0	MISSENSE, INFRAME, TRUNCATING MUTATIONS (PUTATIVE DRIVER)	0	0
MMP3	ALL	25	0.0499002	AMPLIFICATION	8	0.0159681	DEEP DELETION	1	0.00199601	mRNA HIGH	16	0.0319361	mRNA LOW	0	0	FUSION	0	0	MISSENSE, INFRAME, TRUNCATING MUTATIONS (PUTATIVE DRIVER)	0	0
MT3	ALL	23	0.0459082	AMPLIFICATION	1	0.00199601	DEEP DELETION	2	0.00399202	mRNA HIGH	20	0.0399202	mRNA LOW	0	0	FUSION	0	0	MISSENSE, INFRAME, TRUNCATING MUTATIONS (PUTATIVE DRIVER)	0	0
MTOR	ALL	54	0.107784	AMPLIFICATION	2	0.00399202	DEEP DELETION	3	0.00598802	mRNA HIGH	33	0.0658683	mRNA LOW	13	0.0259481	FUSION	1	0.00199601	MISSENSE, INFRAME, TRUNCATING MUTATIONS (PUTATIVE DRIVER)	2	0.00399202
NDRG1	ALL	90	0.179641	AMPLIFICATION	26	0.0518962	DEEP DELETION	0	0	mRNA HIGH	62	0.123752	mRNA LOW	0	0	FUSION	2	0.00399202	MISSENSE, INFRAME, TRUNCATING MUTATIONS (PUTATIVE DRIVER)	0	0
NFKB1	ALL	22	0.0439122	AMPLIFICATION	1	0.00199601	DEEP DELETION	0	0	mRNA HIGH	15	0.0299401	mRNA LOW	6	0.011976	FUSION	0	0	MISSENSE, INFRAME, TRUNCATING MUTATIONS (PUTATIVE DRIVER)	0	0
NOS1	ALL	11	0.0219561	AMPLIFICATION	1	0.00199601	DEEP DELETION	2	0.00399202	mRNA HIGH	8	0.0159681	mRNA LOW	0	0	FUSION	0	0	MISSENSE, INFRAME, TRUNCATING MUTATIONS (PUTATIVE DRIVER)	0	0
NOS2	ALL	21	0.0419162	AMPLIFICATION	8	0.0159681	DEEP DELETION	0	0	mRNA HIGH	13	0.0259481	mRNA LOW	0	0	FUSION	0	0	MISSENSE, INFRAME, TRUNCATING MUTATIONS (PUTATIVE DRIVER)	0	0
NOS3	ALL	31	0.0618762	AMPLIFICATION	9	0.0179641	DEEP DELETION	0	0	mRNA HIGH	21	0.0419162	mRNA LOW	0	0	FUSION	1	0.00199601	MISSENSE, INFRAME, TRUNCATING MUTATIONS (PUTATIVE DRIVER)	0	0
NOTCH1	ALL	22	0.0439122	AMPLIFICATION	2	0.00399202	DEEP DELETION	1	0.00199601	mRNA HIGH	13	0.0259481	mRNA LOW	0	0	FUSION	1	0.00199601	MISSENSE, INFRAME, TRUNCATING MUTATIONS (PUTATIVE DRIVER)	5	0.00998004
NPEPPS	ALL	78	0.155689	AMPLIFICATION	2	0.00399202	DEEP DELETION	0	0	mRNA HIGH	74	0.147705	mRNA LOW	0	0	FUSION	2	0.00399202	MISSENSE, INFRAME, TRUNCATING MUTATIONS (PUTATIVE DRIVER)	0	0
NPPA	ALL	4	0.00798403	AMPLIFICATION	2	0.00399202	DEEP DELETION	0	0	mRNA HIGH	2	0.00399202	mRNA LOW	0	0	FUSION	0	0	MISSENSE, INFRAME, TRUNCATING MUTATIONS (PUTATIVE DRIVER)	0	0
NPPB	ALL	12	0.0239521	AMPLIFICATION	2	0.00399202	DEEP DELETION	0	0	mRNA HIGH	10	0.0199601	mRNA LOW	0	0	FUSION	0	0	MISSENSE, INFRAME, TRUNCATING MUTATIONS (PUTATIVE DRIVER)	0	0
NR4A2	ALL	32	0.0638723	AMPLIFICATION	2	0.00399202	DEEP DELETION	0	0	mRNA HIGH	29	0.0578842	mRNA LOW	0	0	FUSION	1	0.00199601	MISSENSE, INFRAME, TRUNCATING MUTATIONS (PUTATIVE DRIVER)	0	0
NRP1	ALL	27	0.0538922	AMPLIFICATION	6	0.011976	DEEP DELETION	0	0	mRNA HIGH	20	0.0399202	mRNA LOW	0	0	FUSION	1	0.00199601	MISSENSE, INFRAME, TRUNCATING MUTATIONS (PUTATIVE DRIVER)	0	0
NRP2	ALL	29	0.0578842	AMPLIFICATION	3	0.00598802	DEEP DELETION	0	0	mRNA HIGH	26	0.0518962	mRNA LOW	0	0	FUSION	0	0	MISSENSE, INFRAME, TRUNCATING MUTATIONS (PUTATIVE DRIVER)	0	0
OS9	ALL	76	0.151697	AMPLIFICATION	26	0.0518962	DEEP DELETION	0	0	mRNA HIGH	45	0.0898204	mRNA LOW	3	0.00598802	FUSION	2	0.00399202	MISSENSE, INFRAME, TRUNCATING MUTATIONS (PUTATIVE DRIVER)	0	0
PAM	ALL	26	0.0518962	AMPLIFICATION	0	0	DEEP DELETION	2	0.00399202	mRNA HIGH	24	0.0479042	mRNA LOW	0	0	FUSION	0	0	MISSENSE, INFRAME, TRUNCATING MUTATIONS (PUTATIVE DRIVER)	0	0
PDE5A	ALL	17	0.0339321	AMPLIFICATION	0	0	DEEP DELETION	1	0.00199601	mRNA HIGH	16	0.0319361	mRNA LOW	0	0	FUSION	0	0	MISSENSE, INFRAME, TRUNCATING MUTATIONS (PUTATIVE DRIVER)	0	0
PDGFB	ALL	23	0.0459082	AMPLIFICATION	1	0.00199601	DEEP DELETION	1	0.00199601	mRNA HIGH	21	0.0419162	mRNA LOW	0	0	FUSION	0	0	MISSENSE, INFRAME, TRUNCATING MUTATIONS (PUTATIVE DRIVER)	0	0
PDHA1	ALL	33	0.0658683	AMPLIFICATION	2	0.00399202	DEEP DELETION	2	0.00399202	mRNA HIGH	29	0.0578842	mRNA LOW	0	0	FUSION	0	0	MISSENSE, INFRAME, TRUNCATING MUTATIONS (PUTATIVE DRIVER)	0	0
PDHA2	ALL	33	0.0658683	AMPLIFICATION	0	0	DEEP DELETION	0	0	mRNA HIGH	33	0.0658683	mRNA LOW	0	0	FUSION	0	0	MISSENSE, INFRAME, TRUNCATING MUTATIONS (PUTATIVE DRIVER)	0	0
PDHB	ALL	22	0.0439122	AMPLIFICATION	1	0.00199601	DEEP DELETION	0	0	mRNA HIGH	17	0.0339321	mRNA LOW	4	0.00798403	FUSION	0	0	MISSENSE, INFRAME, TRUNCATING MUTATIONS (PUTATIVE DRIVER)	0	0
PDIA2	ALL	28	0.0558882	AMPLIFICATION	3	0.00598802	DEEP DELETION	2	0.00399202	mRNA HIGH	23	0.0459082	mRNA LOW	0	0	FUSION	0	0	MISSENSE, INFRAME, TRUNCATING MUTATIONS (PUTATIVE DRIVER)	0	0
PDK1	ALL	30	0.0598802	AMPLIFICATION	3	0.00598802	DEEP DELETION	0	0	mRNA HIGH	27	0.0538922	mRNA LOW	0	0	FUSION	0	0	MISSENSE, INFRAME, TRUNCATING MUTATIONS (PUTATIVE DRIVER)	0	0
PFKFB3	ALL	32	0.0638723	AMPLIFICATION	4	0.00798403	DEEP DELETION	2	0.00399202	mRNA HIGH	26	0.0518962	mRNA LOW	0	0	FUSION	0	0	MISSENSE, INFRAME, TRUNCATING MUTATIONS (PUTATIVE DRIVER)	0	0
PFKL	ALL	59	0.117764	AMPLIFICATION	3	0.00598802	DEEP DELETION	1	0.00199601	mRNA HIGH	37	0.0738523	mRNA LOW	17	0.0339321	FUSION	1	0.00199601	MISSENSE, INFRAME, TRUNCATING MUTATIONS (PUTATIVE DRIVER)	0	0
PFKM	ALL	34	0.0678643	AMPLIFICATION	3	0.00598802	DEEP DELETION	2	0.00399202	mRNA HIGH	29	0.0578842	mRNA LOW	0	0	FUSION	0	0	MISSENSE, INFRAME, TRUNCATING MUTATIONS (PUTATIVE DRIVER)	0	0
PFKP	ALL	40	0.0798403	AMPLIFICATION	3	0.00598802	DEEP DELETION	3	0.00598802	mRNA HIGH	34	0.0678643	mRNA LOW	0	0	FUSION	0	0	MISSENSE, INFRAME, TRUNCATING MUTATIONS (PUTATIVE DRIVER)	0	0
PGF	ALL	9	0.0179641	AMPLIFICATION	4	0.00798403	DEEP DELETION	1	0.00199601	mRNA HIGH	4	0.00798403	mRNA LOW	0	0	FUSION	0	0	MISSENSE, INFRAME, TRUNCATING MUTATIONS (PUTATIVE DRIVER)	0	0
PGK1	ALL	18	0.0359281	AMPLIFICATION	1	0.00199601	DEEP DELETION	0	0	mRNA HIGH	17	0.0339321	mRNA LOW	0	0	FUSION	0	0	MISSENSE, INFRAME, TRUNCATING MUTATIONS (PUTATIVE DRIVER)	0	0
PGK2	ALL	24	0.0479042	AMPLIFICATION	5	0.00998004	DEEP DELETION	0	0	mRNA HIGH	19	0.0379242	mRNA LOW	0	0	FUSION	0	0	MISSENSE, INFRAME, TRUNCATING MUTATIONS (PUTATIVE DRIVER)	0	0
PIK3CA	ALL	94	0.187625	AMPLIFICATION	9	0.0179641	DEEP DELETION	2	0.00399202	mRNA HIGH	57	0.113772	mRNA LOW	5	0.00998004	FUSION	0	0	MISSENSE, INFRAME, TRUNCATING MUTATIONS (PUTATIVE DRIVER)	21	0.0419162
PIK3CB	ALL	48	0.0958084	AMPLIFICATION	4	0.00798403	DEEP DELETION	0	0	mRNA HIGH	41	0.0818363	mRNA LOW	3	0.00598802	FUSION	0	0	MISSENSE, INFRAME, TRUNCATING MUTATIONS (PUTATIVE DRIVER)	0	0
PIK3CD	ALL	24	0.0479042	AMPLIFICATION	2	0.00399202	DEEP DELETION	2	0.00399202	mRNA HIGH	19	0.0379242	mRNA LOW	0	0	FUSION	1	0.00199601	MISSENSE, INFRAME, TRUNCATING MUTATIONS (PUTATIVE DRIVER)	0	0
PIK3CG	ALL	34	0.0678643	AMPLIFICATION	7	0.0139721	DEEP DELETION	2	0.00399202	mRNA HIGH	25	0.0499002	mRNA LOW	0	0	FUSION	0	0	MISSENSE, INFRAME, TRUNCATING MUTATIONS (PUTATIVE DRIVER)	0	0
PIK3R1	ALL	21	0.0419162	AMPLIFICATION	0	0	DEEP DELETION	4	0.00798403	mRNA HIGH	14	0.0279441	mRNA LOW	0	0	FUSION	0	0	MISSENSE, INFRAME, TRUNCATING MUTATIONS (PUTATIVE DRIVER)	3	0.00598802
PIK3R2	ALL	23	0.0459082	AMPLIFICATION	1	0.00199601	DEEP DELETION	1	0.00199601	mRNA HIGH	20	0.0399202	mRNA LOW	0	0	FUSION	0	0	MISSENSE, INFRAME, TRUNCATING MUTATIONS (PUTATIVE DRIVER)	1	0.00199601
PIK3R3	ALL	35	0.0698603	AMPLIFICATION	2	0.00399202	DEEP DELETION	0	0	mRNA HIGH	33	0.0658683	mRNA LOW	0	0	FUSION	0	0	MISSENSE, INFRAME, TRUNCATING MUTATIONS (PUTATIVE DRIVER)	0	0
PKLR	ALL	50	0.0998004	AMPLIFICATION	45	0.0898204	DEEP DELETION	0	0	mRNA HIGH	4	0.00798403	mRNA LOW	0	0	FUSION	1	0.00199601	MISSENSE, INFRAME, TRUNCATING MUTATIONS (PUTATIVE DRIVER)	0	0
PLCG1	ALL	48	0.0958084	AMPLIFICATION	3	0.00598802	DEEP DELETION	1	0.00199601	mRNA HIGH	42	0.0838323	mRNA LOW	2	0.00399202	FUSION	0	0	MISSENSE, INFRAME, TRUNCATING MUTATIONS (PUTATIVE DRIVER)	0	0
PLCG2	ALL	24	0.0479042	AMPLIFICATION	0	0	DEEP DELETION	3	0.00598802	mRNA HIGH	20	0.0399202	mRNA LOW	0	0	FUSION	1	0.00199601	MISSENSE, INFRAME, TRUNCATING MUTATIONS (PUTATIVE DRIVER)	0	0
PLOD1	ALL	25	0.0499002	AMPLIFICATION	2	0.00399202	DEEP DELETION	0	0	mRNA HIGH	23	0.0459082	mRNA LOW	0	0	FUSION	0	0	MISSENSE, INFRAME, TRUNCATING MUTATIONS (PUTATIVE DRIVER)	0	0
PLOD2	ALL	35	0.0698603	AMPLIFICATION	5	0.00998004	DEEP DELETION	0	0	mRNA HIGH	30	0.0598802	mRNA LOW	0	0	FUSION	0	0	MISSENSE, INFRAME, TRUNCATING MUTATIONS (PUTATIVE DRIVER)	0	0
PMAIP1	ALL	41	0.0818363	AMPLIFICATION	0	0	DEEP DELETION	10	0.0199601	mRNA HIGH	31	0.0618762	mRNA LOW	0	0	FUSION	0	0	MISSENSE, INFRAME, TRUNCATING MUTATIONS (PUTATIVE DRIVER)	0	0
PML	ALL	17	0.0339321	AMPLIFICATION	2	0.00399202	DEEP DELETION	1	0.00199601	mRNA HIGH	14	0.0279441	mRNA LOW	0	0	FUSION	0	0	MISSENSE, INFRAME, TRUNCATING MUTATIONS (PUTATIVE DRIVER)	0	0
POLR2A	ALL	21	0.0419162	AMPLIFICATION	0	0	DEEP DELETION	6	0.011976	mRNA HIGH	10	0.0199601	mRNA LOW	4	0.00798403	FUSION	1	0.00199601	MISSENSE, INFRAME, TRUNCATING MUTATIONS (PUTATIVE DRIVER)	0	0
PPARA	ALL	32	0.0638723	AMPLIFICATION	1	0.00199601	DEEP DELETION	3	0.00598802	mRNA HIGH	28	0.0558882	mRNA LOW	0	0	FUSION	0	0	MISSENSE, INFRAME, TRUNCATING MUTATIONS (PUTATIVE DRIVER)	0	0
PRKAA1	ALL	97	0.193613	AMPLIFICATION	40	0.0798403	DEEP DELETION	0	0	mRNA HIGH	56	0.111776	mRNA LOW	0	0	FUSION	1	0.00199601	MISSENSE, INFRAME, TRUNCATING MUTATIONS (PUTATIVE DRIVER)	0	0
PRKAA2	ALL	36	0.0718563	AMPLIFICATION	4	0.00798403	DEEP DELETION	1	0.00199601	mRNA HIGH	31	0.0618762	mRNA LOW	0	0	FUSION	0	0	MISSENSE, INFRAME, TRUNCATING MUTATIONS (PUTATIVE DRIVER)	0	0
PRKCA	ALL	52	0.103792	AMPLIFICATION	11	0.0219561	DEEP DELETION	0	0	mRNA HIGH	39	0.0778443	mRNA LOW	0	0	FUSION	2	0.00399202	MISSENSE, INFRAME, TRUNCATING MUTATIONS (PUTATIVE DRIVER)	0	0
PRKCB	ALL	16	0.0319361	AMPLIFICATION	1	0.00199601	DEEP DELETION	2	0.00399202	mRNA HIGH	13	0.0259481	mRNA LOW	0	0	FUSION	0	0	MISSENSE, INFRAME, TRUNCATING MUTATIONS (PUTATIVE DRIVER)	0	0
PRKCG	ALL	14	0.0279441	AMPLIFICATION	3	0.00598802	DEEP DELETION	0	0	mRNA HIGH	11	0.0219561	mRNA LOW	0	0	FUSION	0	0	MISSENSE, INFRAME, TRUNCATING MUTATIONS (PUTATIVE DRIVER)	0	0
PSEN2	ALL	122	0.243513	AMPLIFICATION	14	0.0279441	DEEP DELETION	0	0	mRNA HIGH	104	0.207585	mRNA LOW	4	0.00798403	FUSION	0	0	MISSENSE, INFRAME, TRUNCATING MUTATIONS (PUTATIVE DRIVER)	0	0
PSMC3	ALL	38	0.0758483	AMPLIFICATION	3	0.00598802	DEEP DELETION	1	0.00199601	mRNA HIGH	34	0.0678643	mRNA LOW	0	0	FUSION	0	0	MISSENSE, INFRAME, TRUNCATING MUTATIONS (PUTATIVE DRIVER)	0	0
RBX1	ALL	29	0.0578842	AMPLIFICATION	1	0.00199601	DEEP DELETION	1	0.00199601	mRNA HIGH	27	0.0538922	mRNA LOW	0	0	FUSION	0	0	MISSENSE, INFRAME, TRUNCATING MUTATIONS (PUTATIVE DRIVER)	0	0
RELA	ALL	64	0.127745	AMPLIFICATION	1	0.00199601	DEEP DELETION	1	0.00199601	mRNA HIGH	43	0.0858283	mRNA LOW	19	0.0379242	FUSION	0	0	MISSENSE, INFRAME, TRUNCATING MUTATIONS (PUTATIVE DRIVER)	0	0
RPS6	ALL	13	0.0259481	AMPLIFICATION	0	0	DEEP DELETION	2	0.00399202	mRNA HIGH	11	0.0219561	mRNA LOW	0	0	FUSION	0	0	MISSENSE, INFRAME, TRUNCATING MUTATIONS (PUTATIVE DRIVER)	0	0
RPS6KB1	ALL	113	0.225549	AMPLIFICATION	12	0.0239521	DEEP DELETION	0	0	mRNA HIGH	99	0.197605	mRNA LOW	1	0.00199601	FUSION	1	0.00199601	MISSENSE, INFRAME, TRUNCATING MUTATIONS (PUTATIVE DRIVER)	0	0
RPS6KB2	ALL	55	0.10978	AMPLIFICATION	7	0.0139721	DEEP DELETION	0	0	mRNA HIGH	45	0.0898204	mRNA LOW	3	0.00598802	FUSION	0	0	MISSENSE, INFRAME, TRUNCATING MUTATIONS (PUTATIVE DRIVER)	0	0
RYR1	ALL	33	0.0658683	AMPLIFICATION	9	0.0179641	DEEP DELETION	0	0	mRNA HIGH	24	0.0479042	mRNA LOW	0	0	FUSION	0	0	MISSENSE, INFRAME, TRUNCATING MUTATIONS (PUTATIVE DRIVER)	0	0
SATB1	ALL	19	0.0379242	AMPLIFICATION	1	0.00199601	DEEP DELETION	2	0.00399202	mRNA HIGH	16	0.0319361	mRNA LOW	0	0	FUSION	0	0	MISSENSE, INFRAME, TRUNCATING MUTATIONS (PUTATIVE DRIVER)	0	0
SCNN1B	ALL	25	0.0499002	AMPLIFICATION	1	0.00199601	DEEP DELETION	1	0.00199601	mRNA HIGH	22	0.0439122	mRNA LOW	0	0	FUSION	1	0.00199601	MISSENSE, INFRAME, TRUNCATING MUTATIONS (PUTATIVE DRIVER)	0	0
SERPINE1	ALL	28	0.0558882	AMPLIFICATION	10	0.0199601	DEEP DELETION	1	0.00199601	mRNA HIGH	17	0.0339321	mRNA LOW	0	0	FUSION	0	0	MISSENSE, INFRAME, TRUNCATING MUTATIONS (PUTATIVE DRIVER)	0	0
SFRP1	ALL	47	0.0938124	AMPLIFICATION	18	0.0359281	DEEP DELETION	7	0.0139721	mRNA HIGH	21	0.0419162	mRNA LOW	0	0	FUSION	1	0.00199601	MISSENSE, INFRAME, TRUNCATING MUTATIONS (PUTATIVE DRIVER)	0	0
SHC1	ALL	114	0.227545	AMPLIFICATION	50	0.0998004	DEEP DELETION	0	0	mRNA HIGH	63	0.125749	mRNA LOW	0	0	FUSION	1	0.00199601	MISSENSE, INFRAME, TRUNCATING MUTATIONS (PUTATIVE DRIVER)	0	0
SLC29A1	ALL	53	0.105788	AMPLIFICATION	14	0.0279441	DEEP DELETION	0	0	mRNA HIGH	39	0.0778443	mRNA LOW	0	0	FUSION	0	0	MISSENSE, INFRAME, TRUNCATING MUTATIONS (PUTATIVE DRIVER)	0	0
SLC2A1	ALL	27	0.0538922	AMPLIFICATION	5	0.00998004	DEEP DELETION	0	0	mRNA HIGH	21	0.0419162	mRNA LOW	0	0	FUSION	1	0.00199601	MISSENSE, INFRAME, TRUNCATING MUTATIONS (PUTATIVE DRIVER)	0	0
SLC8A1	ALL	16	0.0319361	AMPLIFICATION	1	0.00199601	DEEP DELETION	0	0	mRNA HIGH	15	0.0299401	mRNA LOW	0	0	FUSION	0	0	MISSENSE, INFRAME, TRUNCATING MUTATIONS (PUTATIVE DRIVER)	0	0
SMAD3	ALL	19	0.0379242	AMPLIFICATION	1	0.00199601	DEEP DELETION	1	0.00199601	mRNA HIGH	15	0.0299401	mRNA LOW	0	0	FUSION	0	0	MISSENSE, INFRAME, TRUNCATING MUTATIONS (PUTATIVE DRIVER)	2	0.00399202
SMAD4	ALL	95	0.189621	AMPLIFICATION	0	0	DEEP DELETION	10	0.0199601	mRNA HIGH	20	0.0399202	mRNA LOW	47	0.0938124	FUSION	0	0	MISSENSE, INFRAME, TRUNCATING MUTATIONS (PUTATIVE DRIVER)	18	0.0359281
SNAI3	ALL	24	0.0479042	AMPLIFICATION	1	0.00199601	DEEP DELETION	9	0.0179641	mRNA HIGH	14	0.0279441	mRNA LOW	0	0	FUSION	0	0	MISSENSE, INFRAME, TRUNCATING MUTATIONS (PUTATIVE DRIVER)	0	0
SOD2	ALL	22	0.0439122	AMPLIFICATION	1	0.00199601	DEEP DELETION	4	0.00798403	mRNA HIGH	17	0.0339321	mRNA LOW	0	0	FUSION	0	0	MISSENSE, INFRAME, TRUNCATING MUTATIONS (PUTATIVE DRIVER)	0	0
SOD3	ALL	13	0.0259481	AMPLIFICATION	2	0.00399202	DEEP DELETION	0	0	mRNA HIGH	11	0.0219561	mRNA LOW	0	0	FUSION	0	0	MISSENSE, INFRAME, TRUNCATING MUTATIONS (PUTATIVE DRIVER)	0	0
SPRY2	ALL	18	0.0359281	AMPLIFICATION	0	0	DEEP DELETION	4	0.00798403	mRNA HIGH	14	0.0279441	mRNA LOW	0	0	FUSION	0	0	MISSENSE, INFRAME, TRUNCATING MUTATIONS (PUTATIVE DRIVER)	0	0
STAT3	ALL	35	0.0698603	AMPLIFICATION	2	0.00399202	DEEP DELETION	0	0	mRNA HIGH	27	0.0538922	mRNA LOW	5	0.00998004	FUSION	0	0	MISSENSE, INFRAME, TRUNCATING MUTATIONS (PUTATIVE DRIVER)	1	0.00199601
STAT5B	ALL	31	0.0618762	AMPLIFICATION	2	0.00399202	DEEP DELETION	0	0	mRNA HIGH	25	0.0499002	mRNA LOW	4	0.00798403	FUSION	0	0	MISSENSE, INFRAME, TRUNCATING MUTATIONS (PUTATIVE DRIVER)	0	0
STC1	ALL	35	0.0698603	AMPLIFICATION	1	0.00199601	DEEP DELETION	28	0.0558882	mRNA HIGH	6	0.011976	mRNA LOW	0	0	FUSION	0	0	MISSENSE, INFRAME, TRUNCATING MUTATIONS (PUTATIVE DRIVER)	0	0
STC2	ALL	30	0.0598802	AMPLIFICATION	8	0.0159681	DEEP DELETION	6	0.011976	mRNA HIGH	16	0.0319361	mRNA LOW	0	0	FUSION	0	0	MISSENSE, INFRAME, TRUNCATING MUTATIONS (PUTATIVE DRIVER)	0	0
TEK	ALL	22	0.0439122	AMPLIFICATION	0	0	DEEP DELETION	12	0.0239521	mRNA HIGH	10	0.0199601	mRNA LOW	0	0	FUSION	0	0	MISSENSE, INFRAME, TRUNCATING MUTATIONS (PUTATIVE DRIVER)	0	0
TF	ALL	4	0.00798403	AMPLIFICATION	1	0.00199601	DEEP DELETION	0	0	mRNA HIGH	3	0.00598802	mRNA LOW	0	0	FUSION	0	0	MISSENSE, INFRAME, TRUNCATING MUTATIONS (PUTATIVE DRIVER)	0	0
TFRC	ALL	70	0.139721	AMPLIFICATION	10	0.0199601	DEEP DELETION	7	0.0139721	mRNA HIGH	53	0.105788	mRNA LOW	0	0	FUSION	0	0	MISSENSE, INFRAME, TRUNCATING MUTATIONS (PUTATIVE DRIVER)	0	0
TGFA	ALL	36	0.0718563	AMPLIFICATION	3	0.00598802	DEEP DELETION	0	0	mRNA HIGH	33	0.0658683	mRNA LOW	0	0	FUSION	0	0	MISSENSE, INFRAME, TRUNCATING MUTATIONS (PUTATIVE DRIVER)	0	0
TGFB1	ALL	21	0.0419162	AMPLIFICATION	3	0.00598802	DEEP DELETION	0	0	mRNA HIGH	17	0.0339321	mRNA LOW	0	0	FUSION	1	0.00199601	MISSENSE, INFRAME, TRUNCATING MUTATIONS (PUTATIVE DRIVER)	0	0
TGFB2	ALL	45	0.0898204	AMPLIFICATION	15	0.0299401	DEEP DELETION	0	0	mRNA HIGH	30	0.0598802	mRNA LOW	0	0	FUSION	0	0	MISSENSE, INFRAME, TRUNCATING MUTATIONS (PUTATIVE DRIVER)	0	0
TGFB3	ALL	21	0.0419162	AMPLIFICATION	3	0.00598802	DEEP DELETION	1	0.00199601	mRNA HIGH	17	0.0339321	mRNA LOW	0	0	FUSION	0	0	MISSENSE, INFRAME, TRUNCATING MUTATIONS (PUTATIVE DRIVER)	0	0
TGFBR1	ALL	14	0.0279441	AMPLIFICATION	0	0	DEEP DELETION	4	0.00798403	mRNA HIGH	9	0.0179641	mRNA LOW	0	0	FUSION	0	0	MISSENSE, INFRAME, TRUNCATING MUTATIONS (PUTATIVE DRIVER)	1	0.00199601
TH	ALL	26	0.0518962	AMPLIFICATION	1	0.00199601	DEEP DELETION	3	0.00598802	mRNA HIGH	22	0.0439122	mRNA LOW	0	0	FUSION	0	0	MISSENSE, INFRAME, TRUNCATING MUTATIONS (PUTATIVE DRIVER)	0	0
THBS1	ALL	29	0.0578842	AMPLIFICATION	0	0	DEEP DELETION	12	0.0239521	mRNA HIGH	17	0.0339321	mRNA LOW	0	0	FUSION	0	0	MISSENSE, INFRAME, TRUNCATING MUTATIONS (PUTATIVE DRIVER)	0	0
TIMP1	ALL	26	0.0518962	AMPLIFICATION	6	0.011976	DEEP DELETION	2	0.00399202	mRNA HIGH	18	0.0359281	mRNA LOW	0	0	FUSION	0	0	MISSENSE, INFRAME, TRUNCATING MUTATIONS (PUTATIVE DRIVER)	0	0
TLR4	ALL	25	0.0499002	AMPLIFICATION	1	0.00199601	DEEP DELETION	0	0	mRNA HIGH	24	0.0479042	mRNA LOW	0	0	FUSION	0	0	MISSENSE, INFRAME, TRUNCATING MUTATIONS (PUTATIVE DRIVER)	0	0
TNC	ALL	27	0.0538922	AMPLIFICATION	1	0.00199601	DEEP DELETION	1	0.00199601	mRNA HIGH	25	0.0499002	mRNA LOW	0	0	FUSION	0	0	MISSENSE, INFRAME, TRUNCATING MUTATIONS (PUTATIVE DRIVER)	0	0
TNF	ALL	13	0.0259481	AMPLIFICATION	6	0.011976	DEEP DELETION	1	0.00199601	mRNA HIGH	6	0.011976	mRNA LOW	0	0	FUSION	0	0	MISSENSE, INFRAME, TRUNCATING MUTATIONS (PUTATIVE DRIVER)	0	0
TP53	ALL	275	0.548902	AMPLIFICATION	0	0	DEEP DELETION	6	0.011976	mRNA HIGH	10	0.0199601	mRNA LOW	0	0	FUSION	0	0	MISSENSE, INFRAME, TRUNCATING MUTATIONS (PUTATIVE DRIVER)	259	0.516966
TSC2	ALL	63	0.125749	AMPLIFICATION	2	0.00399202	DEEP DELETION	1	0.00199601	mRNA HIGH	45	0.0898204	mRNA LOW	12	0.0239521	FUSION	0	0	MISSENSE, INFRAME, TRUNCATING MUTATIONS (PUTATIVE DRIVER)	3	0.00598802
UBE2B	ALL	48	0.0958084	AMPLIFICATION	0	0	DEEP DELETION	4	0.00798403	mRNA HIGH	32	0.0638723	mRNA LOW	12	0.0239521	FUSION	0	0	MISSENSE, INFRAME, TRUNCATING MUTATIONS (PUTATIVE DRIVER)	0	0
UCP2	ALL	51	0.101796	AMPLIFICATION	10	0.0199601	DEEP DELETION	2	0.00399202	mRNA HIGH	39	0.0778443	mRNA LOW	0	0	FUSION	0	0	MISSENSE, INFRAME, TRUNCATING MUTATIONS (PUTATIVE DRIVER)	0	0
USF1	ALL	95	0.189621	AMPLIFICATION	33	0.0658683	DEEP DELETION	0	0	mRNA HIGH	62	0.123752	mRNA LOW	0	0	FUSION	0	0	MISSENSE, INFRAME, TRUNCATING MUTATIONS (PUTATIVE DRIVER)	0	0
[truncated: 5 more rows]

[truncated: 21 more sheets: ST_11, ST_12, ST_13, ST_14, ST_15, ST_16, ST_17, ST_18, ST_19, ST_20, ST_21, ST_22, ST_23, ST_24, ST_25, ST_26, ST_27, ST_28, ST_29, ST_30 …]
